# Supplementary material for: The effect of circulating proteins and their role in mediating adiposity’s effect on endometrioid and non-endometrioid endometrial cancer risk: Mendelian randomisation and colocalization analyses
Source: Research Square preprint supplement (doi:10.21203/rs.3.rs-5815826/v1), 2025-02-04
Supplement: Supplementary file 1 [file ea15ae37cccf12e8200cc589.xlsx]

## Sheet: Table of Contents
Supplementary tables
ST1	Details of genetic variants used to instrument adiposity measures
ST2	Details of genetic variants used to instrument Olink plasma proteins
ST3	Details of genetic variants used to instrument SomaScan aptamers
ST4	Details of genetic variants used to instrument endometrial cancers
ST5	Association between plasma proteins and endometrial cancer risk - Univariable MR and colocalization
ST6	Association between endometrial cancer risk and plasma proteins - Univariable MR (reverse MR)
ST7	Association between adiposity measures and endometrial cancer risk - Univariable MR
ST8	Association between endometrial cancer risk and adiposity - Univariable MR (reverse MR)
ST9	Association between adiposity and plasma proteins - Univariable MR
ST10	Association between plasma proteins and adiposity - Univariable MR (reverse MR)
ST11	Results from multivariable MR mediation analysis
ST12	Pathway enrichment analysis results for endometrioid cancer subtype
ST13	Pathway enrichment analysis results for non-endometrioid cancer subtype
ST14	Overlaps between pQTL associated with endometrial cancer risk and eQTL in various tissues

## Sheet: ST1
GWAS	Trait	SNP	Chromosome	Position (build 37)	Effect Allele	Non-Effect Allele	Effect Allele Frequency	Effect	Standard Error	P-value	Sample size
Pulit	BMI_female_GIANT-UKB	rs79113395	1	1590521	A	G	0.2668	-0.021	0.003	1.45e-12	262817
Pulit	BMI_female_GIANT-UKB	rs112646560	1	39560250	T	C	0.212	0.0196	0.0032	1.137e-09	262817
Pulit	BMI_female_GIANT-UKB	rs2984618	1	47690438	T	G	0.4426	0.0167	0.0022	2.206e-14	434550
Pulit	BMI_female_GIANT-UKB	rs657452	1	49589847	A	G	0.4045	0.0203	0.0022	1.143e-19	430417
Pulit	BMI_female_GIANT-UKB	rs12140153	1	62579891	T	G	0.0905	-0.0326	0.0047	2.873e-12	262817
Pulit	BMI_female_GIANT-UKB	rs2568958	1	72765116	A	G	0.6187	0.0227	0.0022	1.321e-24	431755
Pulit	BMI_female_GIANT-UKB	rs6669189	1	75011358	T	C	0.4051	0.021	0.0022	4.685e-21	434507
Pulit	BMI_female_GIANT-UKB	rs34517439	1	78450517	A	C	0.1173	0.039	0.0041	2.002e-21	262817
Pulit	BMI_female_GIANT-UKB	rs11165643	1	96924097	T	C	0.5793	0.0181	0.0022	1.714e-16	434133
Pulit	BMI_female_GIANT-UKB	rs4421623	1	98316285	T	G	0.2103	0.0184	0.0027	1.132e-11	394828
Pulit	BMI_female_GIANT-UKB	rs7550711	1	110082886	T	C	0.0283	0.0641	0.0068	3.368e-21	422979
Pulit	BMI_female_GIANT-UKB	rs197374	1	112289983	T	C	0.405	0.0171	0.0023	2.822e-13	394904
Pulit	BMI_female_GIANT-UKB	rs61813324	1	156049877	T	C	0.1308	0.0298	0.0039	3.598e-14	262817
Pulit	BMI_female_GIANT-UKB	rs12564992	1	174478100	A	G	0.8875	-0.0207	0.0035	2.367e-09	434785
Pulit	BMI_female_GIANT-UKB	rs543874	1	177889480	A	G	0.7768	-0.0576	0.0027	8.7e-100	434718
Pulit	BMI_female_GIANT-UKB	rs10920678	1	190239907	A	G	0.4244	0.0163	0.0022	7.46e-14	434469
Pulit	BMI_female_GIANT-UKB	rs4474229	1	195037001	A	G	0.3694	-0.0173	0.0027	1.64e-10	262817
Pulit	BMI_female_GIANT-UKB	rs2820295	1	201800868	A	G	0.3253	0.0214	0.0024	8.025e-19	394857
Pulit	BMI_female_GIANT-UKB	rs12042959	1	243533273	A	G	0.8646	0.0194	0.0032	2.325e-09	394909
Pulit	BMI_female_GIANT-UKB	rs62106258	2	417167	T	C	0.9532	0.0989	0.0062	8.722e-58	262817
Pulit	BMI_female_GIANT-UKB	rs6548237	2	621461	A	C	0.1598	-0.0576	0.0029	4.43e-89	431436
Pulit	BMI_female_GIANT-UKB	rs10182181	2	25150296	A	G	0.5049	-0.0362	0.0022	5.002e-63	434580
Pulit	BMI_female_GIANT-UKB	rs10048652	2	35449306	T	C	0.4495	0.0135	0.0023	3.471e-09	394916
Pulit	BMI_female_GIANT-UKB	rs35722922	2	47002226	A	G	0.6255	0.0188	0.0027	3.649e-12	262817
Pulit	BMI_female_GIANT-UKB	rs1421598	2	50264710	A	C	0.8411	-0.0192	0.0031	6.783e-10	394735
Pulit	BMI_female_GIANT-UKB	rs7601895	2	55281901	C	G	0.6892	0.0161	0.0025	9.613e-11	391703
Pulit	BMI_female_GIANT-UKB	rs1861412	2	58893065	A	G	0.4233	-0.0215	0.0023	9.126e-21	394912
Pulit	BMI_female_GIANT-UKB	rs6728037	2	59297346	A	G	0.3856	0.0207	0.0023	6.486e-19	394906
Pulit	BMI_female_GIANT-UKB	rs2861685	2	67837553	T	C	0.5861	0.018	0.0026	1.052e-11	262817
Pulit	BMI_female_GIANT-UKB	rs12714199	2	86812549	T	C	0.6145	-0.0146	0.0023	5.124e-10	394916
Pulit	BMI_female_GIANT-UKB	rs11677607	2	100751150	T	C	0.246	-0.024	0.0027	2.873e-19	394858
Pulit	BMI_female_GIANT-UKB	rs1457457	2	104340148	A	T	0.5319	0.0142	0.0023	3.786e-10	394924
Pulit	BMI_female_GIANT-UKB	rs6739199	2	105452326	T	C	0.2695	0.0159	0.0025	3.199e-10	394818
Pulit	BMI_female_GIANT-UKB	rs13002158	2	144021712	A	G	0.8125	-0.0208	0.0029	1.152e-12	394912
Pulit	BMI_female_GIANT-UKB	rs12692596	2	161265910	T	C	0.3605	0.0146	0.0023	9.742e-11	434752
Pulit	BMI_female_GIANT-UKB	rs12692738	2	165558252	T	C	0.7641	-0.0162	0.0026	2.824e-10	434675
Pulit	BMI_female_GIANT-UKB	rs7588437	2	181575281	A	G	0.3672	-0.0176	0.0023	8.38e-15	434545
Pulit	BMI_female_GIANT-UKB	rs4482463	2	205375909	A	C	0.9169	-0.0365	0.0042	5.207e-18	368904
Pulit	BMI_female_GIANT-UKB	rs11692326	2	208263279	T	C	0.2295	0.0156	0.0026	2.035e-09	431766
Pulit	BMI_female_GIANT-UKB	rs4673553	2	211608379	T	G	0.5552	-0.0153	0.0023	2.589e-11	394839
Pulit	BMI_female_GIANT-UKB	rs12612009	2	228982603	T	G	0.6627	-0.0141	0.0024	3.776e-09	394922
Pulit	BMI_female_GIANT-UKB	rs6720868	2	230663576	T	C	0.3063	0.0169	0.0024	4.646e-12	394828
Pulit	BMI_female_GIANT-UKB	rs4858223	3	20581149	T	C	0.3263	-0.0161	0.0025	8.26e-11	394322
Pulit	BMI_female_GIANT-UKB	rs1799923	3	42306294	A	G	0.1108	-0.0243	0.0035	5.098e-12	394912
Pulit	BMI_female_GIANT-UKB	rs6446187	3	49907111	A	C	0.505	0.0278	0.0026	1.215e-26	262817
Pulit	BMI_female_GIANT-UKB	rs1916801	3	61187046	A	T	0.6199	0.017	0.0022	1.752e-14	430006
Pulit	BMI_female_GIANT-UKB	rs1452075	3	62481063	T	C	0.7318	0.0159	0.0025	1.469e-10	428309
Pulit	BMI_female_GIANT-UKB	rs925018	3	62713143	C	G	0.6652	-0.0142	0.0023	9.811e-10	434715
Pulit	BMI_female_GIANT-UKB	rs7647242	3	82642734	T	C	0.3941	0.0145	0.0023	3.917e-10	394872
Pulit	BMI_female_GIANT-UKB	rs13068138	3	85809425	T	C	0.1915	0.0231	0.0027	3.602e-17	433973
Pulit	BMI_female_GIANT-UKB	rs1949197	3	86273850	A	G	0.4013	0.0139	0.0023	3.039e-09	394884
Pulit	BMI_female_GIANT-UKB	rs1492014	3	94071481	T	C	0.5681	-0.0145	0.0023	2.841e-10	394714
Pulit	BMI_female_GIANT-UKB	rs1289736	3	107950892	T	C	0.5434	0.0139	0.0023	1.43e-09	394668
Pulit	BMI_female_GIANT-UKB	rs7428670	3	131579810	C	G	0.2691	0.0202	0.0026	3.09e-15	394927
Pulit	BMI_female_GIANT-UKB	rs7621025	3	136272246	T	C	0.2608	-0.02	0.0025	1.622e-15	434707
Pulit	BMI_female_GIANT-UKB	rs16851483	3	141275436	T	G	0.0728	0.0363	0.0046	2.278e-15	394844
Pulit	BMI_female_GIANT-UKB	rs355754	3	154024165	T	C	0.6041	-0.0142	0.0023	4.264e-10	416234
Pulit	BMI_female_GIANT-UKB	rs247975	3	173107443	T	C	0.4659	-0.0182	0.0023	3.622e-15	388425
Pulit	BMI_female_GIANT-UKB	rs10513801	3	185822353	T	G	0.8778	0.0352	0.0032	1.259e-27	428353
Pulit	BMI_female_GIANT-UKB	rs994596	4	18459828	T	C	0.3254	0.015	0.0025	1.021e-09	394816
Pulit	BMI_female_GIANT-UKB	rs34811474	4	25408838	A	G	0.222	-0.0317	0.0031	5.19e-24	262817
Pulit	BMI_female_GIANT-UKB	rs73213484	4	28489339	A	T	0.8566	0.025	0.0037	2.278e-11	262817
Pulit	BMI_female_GIANT-UKB	rs10938397	4	45182527	A	G	0.5712	-0.0315	0.0022	1.66e-45	434203
Pulit	BMI_female_GIANT-UKB	rs11727273	4	55509748	T	C	0.5549	-0.0169	0.0026	1.282e-10	262817
Pulit	BMI_female_GIANT-UKB	rs10002111	4	67815504	A	G	0.2244	0.0169	0.0028	9.261e-10	394914
Pulit	BMI_female_GIANT-UKB	rs12645001	4	96018337	A	G	0.3556	-0.0141	0.0024	4.109e-09	394771
Pulit	BMI_female_GIANT-UKB	rs13107325	4	103188709	T	C	0.0826	0.0452	0.0044	9.328e-25	434263
Pulit	BMI_female_GIANT-UKB	rs4834272	4	113313986	T	C	0.6866	-0.0143	0.0023	8.239e-10	434681
Pulit	BMI_female_GIANT-UKB	rs57800857	4	140863365	A	C	0.6334	0.0186	0.0027	1.069e-11	262817
Pulit	BMI_female_GIANT-UKB	rs750090	4	152931436	T	C	0.6237	0.0156	0.0024	7.401e-11	394917
Pulit	BMI_female_GIANT-UKB	rs13110266	4	162129844	A	G	0.4027	-0.0142	0.0022	1.546e-10	434749
Pulit	BMI_female_GIANT-UKB	rs6890310	5	27193573	A	G	0.294	-0.0154	0.0025	1.381e-09	394897
Pulit	BMI_female_GIANT-UKB	rs782971	5	43124688	A	G	0.7544	-0.0172	0.0025	4.89e-12	434760
Pulit	BMI_female_GIANT-UKB	rs10471636	5	63979856	A	G	0.5248	-0.017	0.0024	4.662e-13	394170
Pulit	BMI_female_GIANT-UKB	rs2112347	5	75015242	T	G	0.6296	0.0309	0.0023	2.128e-42	434716
Pulit	BMI_female_GIANT-UKB	rs6870983	5	87697533	T	C	0.2063	-0.0212	0.0026	9.605e-16	434772
Pulit	BMI_female_GIANT-UKB	rs141729694	5	87999371	T	C	0.0732	0.0386	0.0051	2.525e-14	262817
Pulit	BMI_female_GIANT-UKB	rs158186	5	107440856	A	G	0.166	-0.0287	0.0031	3.229e-20	391129
Pulit	BMI_female_GIANT-UKB	rs4895231	5	119388659	C	G	0.4684	0.0143	0.0023	9.262e-10	393536
Pulit	BMI_female_GIANT-UKB	rs13174863	5	139080745	A	G	0.8543	-0.027	0.0031	4.533e-18	427624
Pulit	BMI_female_GIANT-UKB	rs4569924	5	153540025	T	C	0.4354	0.0158	0.0022	7.439e-13	434782
Pulit	BMI_female_GIANT-UKB	rs2053682	5	170599327	A	C	0.6776	0.0183	0.0025	1.888e-13	394072
Pulit	BMI_female_GIANT-UKB	rs2228213	6	12124855	A	G	0.3374	-0.0148	0.0023	9.209e-11	434761
Pulit	BMI_female_GIANT-UKB	rs9367369	6	13189941	A	G	0.7095	0.0173	0.0029	2.322e-09	262817
Pulit	BMI_female_GIANT-UKB	rs3806114	6	20482335	A	G	0.6943	-0.0141	0.0024	4.485e-09	433865
Pulit	BMI_female_GIANT-UKB	rs2178899	6	31606756	A	T	0.8853	0.0248	0.0033	7.162e-14	429283
Pulit	BMI_female_GIANT-UKB	rs2814992	6	34617144	A	G	0.6666	-0.0287	0.0023	1.249e-35	433826
Pulit	BMI_female_GIANT-UKB	rs1579557	6	40371918	T	C	0.288	0.0212	0.0025	3.089e-17	394832
Pulit	BMI_female_GIANT-UKB	rs943005	6	50865820	T	C	0.1472	0.0398	0.0029	1.992e-43	434779
Pulit	BMI_female_GIANT-UKB	rs2465043	6	51180765	A	G	0.3512	-0.0142	0.0024	3.22e-09	394819
Pulit	BMI_female_GIANT-UKB	rs209416	6	83534729	A	T	0.3236	0.0166	0.0024	8.705e-12	394745
Pulit	BMI_female_GIANT-UKB	rs12202969	6	98576223	A	G	0.4789	-0.0145	0.0023	1.93e-10	394832
Pulit	BMI_female_GIANT-UKB	rs1417665	6	104816944	T	C	0.8017	0.0199	0.0029	5.683e-12	394891
Pulit	BMI_female_GIANT-UKB	rs768023	6	108876002	A	G	0.6025	0.0185	0.0022	1.38e-16	434713
Pulit	BMI_female_GIANT-UKB	rs2357760	6	120213880	A	G	0.6732	0.0159	0.0023	1.091e-11	434770
Pulit	BMI_female_GIANT-UKB	rs198665	6	143154886	A	C	0.3936	0.0134	0.0023	4.417e-09	434741
Pulit	BMI_female_GIANT-UKB	rs2185027	6	153381622	A	C	0.6977	-0.0154	0.0024	1.106e-10	432984
Pulit	BMI_female_GIANT-UKB	rs13213408	6	162998049	A	T	0.8471	0.0197	0.0033	4.334e-09	394851
Pulit	BMI_female_GIANT-UKB	rs6973700	7	1856669	A	G	0.7887	0.0193	0.0032	1.771e-09	262817
Pulit	BMI_female_GIANT-UKB	rs4307239	7	24354300	A	G	0.5357	-0.0141	0.0023	1.311e-09	394329
Pulit	BMI_female_GIANT-UKB	rs10499694	7	50614173	A	G	0.4938	0.0136	0.0022	3.986e-10	434721
Pulit	BMI_female_GIANT-UKB	rs10237317	7	70045941	A	G	0.588	-0.0138	0.0022	6.824e-10	434342
Pulit	BMI_female_GIANT-UKB	rs2267812	7	74138121	A	C	0.8071	-0.0172	0.0029	1.74e-09	382619
Pulit	BMI_female_GIANT-UKB	rs1167800	7	75176196	A	G	0.5534	0.02	0.0022	3.655e-19	420845
Pulit	BMI_female_GIANT-UKB	rs7805441	7	78121458	T	C	0.5471	0.0146	0.0023	2.013e-10	394912
Pulit	BMI_female_GIANT-UKB	rs2528531	7	93236510	A	C	0.6506	-0.0145	0.0024	1.347e-09	394445
Pulit	BMI_female_GIANT-UKB	rs2299383	7	103418846	T	C	0.3952	0.0182	0.0022	2.728e-16	431775
Pulit	BMI_female_GIANT-UKB	rs7788008	7	112972483	A	G	0.4299	-0.0171	0.0023	1.088e-13	394887
Pulit	BMI_female_GIANT-UKB	rs2045293	7	114350102	T	C	0.417	0.0189	0.0023	4.064e-16	394894
Pulit	BMI_female_GIANT-UKB	rs2968864	7	150622162	T	C	0.7563	0.0163	0.0027	9.345e-10	394656
Pulit	BMI_female_GIANT-UKB	rs4240673	8	10787612	T	C	0.4555	0.0176	0.0022	1.029e-15	434734
Pulit	BMI_female_GIANT-UKB	rs2959592	8	17002725	T	C	0.8094	0.017	0.0028	6.259e-10	422363
Pulit	BMI_female_GIANT-UKB	rs1362910	8	30856464	A	G	0.4125	0.0134	0.0023	3.026e-09	416212
Pulit	BMI_female_GIANT-UKB	rs12681792	8	62054463	A	C	0.2036	0.0183	0.0029	2.609e-10	394464
Pulit	BMI_female_GIANT-UKB	rs7827848	8	64790774	A	T	0.5104	0.0153	0.0023	1.877e-11	394914
Pulit	BMI_female_GIANT-UKB	rs1808629	8	73435964	A	G	0.6744	-0.0226	0.0028	5.76e-16	262817
Pulit	BMI_female_GIANT-UKB	rs17405819	8	76806584	T	C	0.683	0.0218	0.0024	7.812e-20	434761
Pulit	BMI_female_GIANT-UKB	rs2721965	8	116662038	A	C	0.669	0.0186	0.0024	2.096e-14	394920
Pulit	BMI_female_GIANT-UKB	rs10124645	9	11321119	A	G	0.592	0.0136	0.0023	4.984e-09	394895
Pulit	BMI_female_GIANT-UKB	rs10756714	9	15885041	A	G	0.5545	0.0208	0.0023	1.461e-19	394831
Pulit	BMI_female_GIANT-UKB	rs10962550	9	16720329	C	G	0.1739	0.0192	0.003	1.699e-10	394595
Pulit	BMI_female_GIANT-UKB	rs16912921	9	28413461	A	C	0.3133	0.0249	0.0023	1.563e-26	433055
Pulit	BMI_female_GIANT-UKB	rs973345	9	29713169	T	C	0.6107	0.0142	0.0023	1.09e-09	394832
Pulit	BMI_female_GIANT-UKB	rs563132	9	37245476	A	T	0.605	0.018	0.0024	1.963e-14	394922
Pulit	BMI_female_GIANT-UKB	rs10797115	9	92191256	T	C	0.5321	0.016	0.0023	4.07e-12	394671
Pulit	BMI_female_GIANT-UKB	rs10992867	9	96461013	A	G	0.2692	0.0185	0.0026	8.885e-13	394886
Pulit	BMI_female_GIANT-UKB	rs10118701	9	103061366	A	G	0.6718	-0.0176	0.0024	2.2e-13	394775
Pulit	BMI_female_GIANT-UKB	rs7024334	9	109072075	T	G	0.226	0.0159	0.0026	1.63e-09	432154
Pulit	BMI_female_GIANT-UKB	rs1928295	9	120378483	T	C	0.5711	0.016	0.0022	2.848e-13	434694
Pulit	BMI_female_GIANT-UKB	rs3829849	9	129390800	T	C	0.3503	0.0136	0.0023	1.925e-09	434748
Pulit	BMI_female_GIANT-UKB	rs10733682	9	129460914	A	G	0.4583	0.0158	0.0022	1.852e-12	434078
Pulit	BMI_female_GIANT-UKB	rs2267958	9	131015279	A	G	0.5097	-0.0161	0.0024	1.878e-11	390569
Pulit	BMI_female_GIANT-UKB	rs7084454	10	21821274	A	G	0.3064	0.0225	0.0025	7.426e-20	388449
Pulit	BMI_female_GIANT-UKB	rs34930419	10	33987329	T	C	0.9682	-0.0458	0.0076	1.371e-09	262817
Pulit	BMI_female_GIANT-UKB	rs10823893	10	53677313	A	G	0.4056	0.0175	0.0027	5.215e-11	262817
Pulit	BMI_female_GIANT-UKB	rs10761785	10	65318766	T	G	0.5139	-0.0172	0.0022	4.17e-15	434558
Pulit	BMI_female_GIANT-UKB	rs10824347	10	77645229	A	T	0.7707	0.0176	0.0027	5.465e-11	394912
Pulit	BMI_female_GIANT-UKB	rs7899106	10	87410904	A	G	0.9495	-0.0375	0.005	7.649e-14	434528
Pulit	BMI_female_GIANT-UKB	rs563296	10	99772404	A	G	0.5578	0.0175	0.0024	8.846e-14	369147
Pulit	BMI_female_GIANT-UKB	rs6585198	10	114762237	A	G	0.4436	-0.0154	0.0022	1.216e-12	433840
Pulit	BMI_female_GIANT-UKB	rs1561589	10	126695673	A	G	0.3609	0.0158	0.0023	4.238e-12	434602
Pulit	BMI_female_GIANT-UKB	rs4880341	10	133992689	T	C	0.5716	-0.0143	0.0023	4.526e-10	394699
Pulit	BMI_female_GIANT-UKB	rs4929923	11	8639200	T	C	0.3365	-0.0221	0.0023	2.507e-22	434437
Pulit	BMI_female_GIANT-UKB	rs11022762	11	13335926	T	C	0.3677	-0.0154	0.0024	5.561e-11	394744
Pulit	BMI_female_GIANT-UKB	rs6265	11	27679916	T	C	0.1829	-0.0368	0.0028	7.952e-40	434768
Pulit	BMI_female_GIANT-UKB	rs2862961	11	43656535	A	G	0.6991	-0.0239	0.0025	5.299e-22	393989
Pulit	BMI_female_GIANT-UKB	rs10742752	11	45438374	T	C	0.3753	-0.0132	0.0022	3.984e-09	434728
Pulit	BMI_female_GIANT-UKB	rs7124681	11	47529947	A	C	0.4175	0.0247	0.0022	9.267e-29	434712
Pulit	BMI_female_GIANT-UKB	rs893006	11	64365796	A	C	0.721	0.0173	0.0024	4.046e-13	433304
Pulit	BMI_female_GIANT-UKB	rs625652	11	65641931	A	T	0.6403	-0.0195	0.0027	9.051e-13	262817
Pulit	BMI_female_GIANT-UKB	rs2605603	11	93221105	A	G	0.4805	-0.0132	0.0022	1.396e-09	434718
Pulit	BMI_female_GIANT-UKB	rs7105462	11	112912048	A	G	0.5808	0.0144	0.0023	4.403e-10	394851
Pulit	BMI_female_GIANT-UKB	rs1048932	11	115044850	A	C	0.4397	-0.0182	0.0022	2.523e-16	434552
Pulit	BMI_female_GIANT-UKB	rs1003081	11	118913993	T	C	0.4349	0.0144	0.0022	6.268e-11	434157
Pulit	BMI_female_GIANT-UKB	rs4459316	11	130756176	T	C	0.5508	-0.0154	0.0023	2.329e-11	394919
Pulit	BMI_female_GIANT-UKB	rs4936175	11	132641959	T	C	0.5588	-0.0158	0.0023	6.687e-12	394908
Pulit	BMI_female_GIANT-UKB	rs329651	11	133767622	T	G	0.8054	0.0181	0.0028	1.959e-10	432259
Pulit	BMI_female_GIANT-UKB	rs12364470	11	134601012	T	G	0.855	-0.02	0.003	2.537e-11	431037
Pulit	BMI_female_GIANT-UKB	rs11611246	12	939480	T	G	0.1991	0.0212	0.0027	1.266e-14	428828
Pulit	BMI_female_GIANT-UKB	rs7976757	12	19207948	T	C	0.1768	-0.0192	0.003	2.937e-10	394397
Pulit	BMI_female_GIANT-UKB	rs16926778	12	24002125	C	G	0.0771	0.026	0.0043	1.409e-09	394675
Pulit	BMI_female_GIANT-UKB	rs7138803	12	50247468	A	G	0.3881	0.0291	0.0023	9.701e-38	434762
Pulit	BMI_female_GIANT-UKB	rs2271189	12	56494991	A	G	0.3958	-0.0146	0.0024	6.353e-10	388396
Pulit	BMI_female_GIANT-UKB	rs11173522	12	60953472	A	C	0.2325	0.0169	0.0028	9.007e-10	394880
Pulit	BMI_female_GIANT-UKB	rs645026	12	69757931	A	G	0.7435	-0.016	0.0026	4.793e-10	394929
Pulit	BMI_female_GIANT-UKB	rs2279574	12	89745477	A	C	0.5485	-0.0165	0.0023	1.956e-12	372012
Pulit	BMI_female_GIANT-UKB	rs2712643	12	99638276	A	C	0.239	-0.0154	0.0025	1.47e-09	434413
Pulit	BMI_female_GIANT-UKB	rs17033633	12	103656343	T	C	0.1692	-0.0209	0.003	7.257e-12	394802
Pulit	BMI_female_GIANT-UKB	rs6606686	12	110903380	C	G	0.6981	-0.0178	0.0023	2.502e-14	434711
Pulit	BMI_female_GIANT-UKB	rs17508240	12	117577358	A	G	0.2135	0.0191	0.0032	2.83e-09	262817
Pulit	BMI_female_GIANT-UKB	rs6489156	12	123100397	T	C	0.7336	0.0222	0.0026	9.972e-18	394897
Pulit	BMI_female_GIANT-UKB	rs7133378	12	124409502	A	G	0.334	0.0158	0.0024	1.85e-11	433002
Pulit	BMI_female_GIANT-UKB	rs9579775	13	20616557	A	C	0.8669	-0.0252	0.004	3.657e-10	262817
Pulit	BMI_female_GIANT-UKB	rs12872889	13	28674628	T	C	0.76	-0.0209	0.0031	1.517e-11	262817
Pulit	BMI_female_GIANT-UKB	rs9595630	13	33065443	T	G	0.6552	0.0145	0.0023	2.044e-10	432099
Pulit	BMI_female_GIANT-UKB	rs12429545	13	54102206	A	G	0.1204	0.0291	0.0033	1.086e-18	429577
Pulit	BMI_female_GIANT-UKB	rs6561937	13	58257667	A	T	0.7668	-0.0197	0.0027	5.951e-13	387825
Pulit	BMI_female_GIANT-UKB	rs4055791	13	59266053	T	C	0.4142	-0.017	0.0027	1.767e-10	262817
Pulit	BMI_female_GIANT-UKB	rs9571687	13	67472713	A	C	0.3417	-0.0145	0.0024	3.236e-09	394895
Pulit	BMI_female_GIANT-UKB	rs1441264	13	79580919	A	G	0.5828	0.0171	0.0023	5.19e-14	428335
Pulit	BMI_female_GIANT-UKB	rs77432547	13	86494817	A	G	0.7236	-0.0175	0.0029	2.284e-09	262817
Pulit	BMI_female_GIANT-UKB	rs1927790	13	96922191	T	C	0.6083	-0.0135	0.0022	1.27e-09	434716
Pulit	BMI_female_GIANT-UKB	rs7335249	13	109962579	T	C	0.5578	0.0135	0.0023	4.906e-09	394619
Pulit	BMI_female_GIANT-UKB	rs2754079	14	25886140	A	G	0.5713	-0.0156	0.0023	2.311e-11	394582
Pulit	BMI_female_GIANT-UKB	rs1569979	14	29681294	A	G	0.774	0.023	0.0027	1.565e-17	394921
Pulit	BMI_female_GIANT-UKB	rs17522122	14	33302882	T	G	0.4667	0.0167	0.0022	6.455e-14	430166
Pulit	BMI_female_GIANT-UKB	rs35020117	14	73341655	T	G	0.5464	0.0165	0.0027	1.23e-09	262817
Pulit	BMI_female_GIANT-UKB	rs7141420	14	79899454	T	C	0.5493	0.021	0.0022	7.842e-22	434698
Pulit	BMI_female_GIANT-UKB	rs1285997	14	91513029	C	G	0.2884	-0.015	0.0025	3.184e-09	391489
Pulit	BMI_female_GIANT-UKB	rs942066	14	94031914	A	G	0.3742	-0.0202	0.0027	1.044e-13	262817
Pulit	BMI_female_GIANT-UKB	rs3803286	14	103246470	A	G	0.3412	0.0172	0.0024	8.286e-13	394757
Pulit	BMI_female_GIANT-UKB	rs709400	14	104149475	A	G	0.6212	0.0184	0.0023	4.409e-16	434772
Pulit	BMI_female_GIANT-UKB	rs8038522	15	46585105	T	G	0.4126	-0.014	0.0023	1.27e-09	394897
Pulit	BMI_female_GIANT-UKB	rs6493498	15	51754451	T	C	0.4455	0.0163	0.0022	1.528e-13	434352
Pulit	BMI_female_GIANT-UKB	rs4776982	15	68114974	A	G	0.7694	0.0311	0.0026	4.248e-33	431574
Pulit	BMI_female_GIANT-UKB	rs12914489	15	74187937	A	G	0.0809	0.0227	0.0036	1.641e-10	434581
Pulit	BMI_female_GIANT-UKB	rs62007782	15	78029797	A	G	0.2585	-0.0179	0.003	1.938e-09	262817
Pulit	BMI_female_GIANT-UKB	rs12593036	15	81058652	A	G	0.6899	0.0154	0.0025	6.645e-10	394723
Pulit	BMI_female_GIANT-UKB	rs11073383	15	95274349	A	G	0.4798	-0.0159	0.0023	3.256e-12	394794
Pulit	BMI_female_GIANT-UKB	rs214249	16	348687	T	G	0.6068	0.0167	0.0024	1.369e-12	394841
Pulit	BMI_female_GIANT-UKB	rs879620	16	4015729	T	C	0.5962	0.0247	0.0023	5.449e-26	394843
Pulit	BMI_female_GIANT-UKB	rs9926784	16	19941968	T	C	0.7995	0.0252	0.0028	6.013e-20	431428
Pulit	BMI_female_GIANT-UKB	rs7498665	16	28883241	A	G	0.6194	-0.0264	0.0022	1.939e-32	433713
Pulit	BMI_female_GIANT-UKB	rs2289292	16	30097630	T	C	0.3315	-0.019	0.0025	1.132e-14	394149
Pulit	BMI_female_GIANT-UKB	rs4889606	16	31011183	A	G	0.6307	0.0268	0.0023	1.251e-32	434665
Pulit	BMI_female_GIANT-UKB	rs9937053	16	53799507	A	G	0.4367	0.0675	0.0022	1e-200	434260
Pulit	BMI_female_GIANT-UKB	rs4783718	16	69547741	T	C	0.4186	0.0204	0.0023	1.772e-19	434771
Pulit	BMI_female_GIANT-UKB	rs811054	16	72251132	T	C	0.5331	0.0162	0.0022	3.178e-13	433837
Pulit	BMI_female_GIANT-UKB	rs2012502	16	81728081	A	C	0.3841	0.0153	0.0023	2.966e-11	433338
Pulit	BMI_female_GIANT-UKB	rs4790292	17	1824305	A	C	0.1474	-0.0263	0.0033	1.654e-15	382930
Pulit	BMI_female_GIANT-UKB	rs1075901	17	15943910	T	C	0.4523	-0.0144	0.0022	4.356e-11	434779
Pulit	BMI_female_GIANT-UKB	rs4986044	17	21261560	T	C	0.4533	-0.0173	0.0022	2.201e-15	432663
Pulit	BMI_female_GIANT-UKB	rs12150665	17	34914787	T	C	0.5916	0.0167	0.0022	5.923e-14	434717
Pulit	BMI_female_GIANT-UKB	rs56161855	17	46288649	A	T	0.8674	-0.0261	0.0039	1.482e-11	262817
Pulit	BMI_female_GIANT-UKB	rs9906944	17	47091420	T	C	0.355	-0.019	0.0024	7.254e-15	394129
Pulit	BMI_female_GIANT-UKB	rs7211966	17	54374611	T	C	0.0287	-0.047	0.008	4.885e-09	387308
Pulit	BMI_female_GIANT-UKB	rs8075273	17	61728881	A	C	0.2895	-0.016	0.0024	5.559e-11	434633
Pulit	BMI_female_GIANT-UKB	rs2619976	17	71754545	T	C	0.3993	0.0146	0.0024	6.174e-10	393654
Pulit	BMI_female_GIANT-UKB	rs12949279	17	78558411	T	C	0.5626	0.0179	0.0022	6.086e-16	434341
Pulit	BMI_female_GIANT-UKB	rs9955276	18	1839339	T	C	0.1441	0.0222	0.0032	8.021e-12	394212
Pulit	BMI_female_GIANT-UKB	rs1808579	18	21104888	T	C	0.4805	-0.0198	0.0022	9.438e-20	434711
Pulit	BMI_female_GIANT-UKB	rs16975921	18	39914870	A	T	0.6949	-0.0163	0.0025	3.87e-11	394906
Pulit	BMI_female_GIANT-UKB	rs1518159	18	40760146	T	C	0.2502	-0.0189	0.0026	6.664e-13	394806
Pulit	BMI_female_GIANT-UKB	rs7239114	18	45921214	A	G	0.5415	0.0155	0.0022	3.897e-12	428092
Pulit	BMI_female_GIANT-UKB	rs6567160	18	57829135	T	C	0.7509	-0.0567	0.0026	8.74e-108	434692
Pulit	BMI_female_GIANT-UKB	rs17066856	18	58049656	T	C	0.8905	0.0398	0.0037	1.393e-27	433877
Pulit	BMI_female_GIANT-UKB	rs12981256	19	1865901	A	G	0.5271	0.0182	0.0023	3.928e-15	393177
Pulit	BMI_female_GIANT-UKB	rs895330	19	4060707	C	G	0.807	0.0181	0.0029	6.645e-10	392069
Pulit	BMI_female_GIANT-UKB	rs273504	19	18215247	A	G	0.5763	-0.0151	0.0023	1.27e-10	394593
Pulit	BMI_female_GIANT-UKB	rs17724992	19	18454825	A	G	0.7186	0.017	0.0025	6.654e-12	433546
Pulit	BMI_female_GIANT-UKB	rs11880870	19	18830704	A	G	0.5189	0.0197	0.0023	3.313e-18	407563
Pulit	BMI_female_GIANT-UKB	rs12462975	19	30272202	A	G	0.3247	0.0203	0.0025	2.629e-16	394254
Pulit	BMI_female_GIANT-UKB	rs7250833	19	33937277	T	C	0.3107	0.0149	0.0024	7.223e-10	434693
Pulit	BMI_female_GIANT-UKB	rs429358	19	45411941	T	C	0.8459	0.0276	0.0036	3.172e-14	262817
Pulit	BMI_female_GIANT-UKB	rs11672660	19	46180184	T	C	0.1867	-0.0321	0.0028	5.932e-31	426392
Pulit	BMI_female_GIANT-UKB	rs9304665	19	47602577	A	T	0.7404	0.0204	0.0027	1.841e-14	394214
Pulit	BMI_female_GIANT-UKB	rs1884389	20	1410582	T	C	0.4397	-0.014	0.0023	1.201e-09	394805
Pulit	BMI_female_GIANT-UKB	rs1884897	20	6612832	A	G	0.3749	-0.0169	0.0023	9.056e-14	434720
Pulit	BMI_female_GIANT-UKB	rs1409818	20	21381121	T	C	0.1082	0.0252	0.0037	1.584e-11	394872
Pulit	BMI_female_GIANT-UKB	rs6142096	20	32686658	A	G	0.5198	0.0134	0.0023	4.17e-09	394896
Pulit	BMI_female_GIANT-UKB	rs17806224	20	51065854	A	G	0.1809	-0.0289	0.003	3.521e-22	394929
Pulit	BMI_female_GIANT-UKB	rs2836754	21	40291740	T	C	0.3691	-0.0149	0.0022	3.727e-11	433845
Pulit	BMI_female_GIANT-UKB	rs427943	21	46570896	A	C	0.4277	-0.0177	0.0023	1.369e-14	405392
Pulit	BMI_female_GIANT-UKB	rs28489620	22	41804716	A	G	0.2821	-0.0181	0.0029	6.903e-10	262817
Pulit	BMI_female_GIANT-UKB	rs13053342	22	48871624	A	G	0.3997	0.0153	0.0024	1.324e-10	393967

## Sheet: ST2
GWAS	Trait	SNP	Chromosome	Position (build 37)	Effect Allele	Non-Effect Allele	Effect Allele Frequency	Effect	Standard Error	P-value	Sample size
Sun	A1BG_P04217_OID30771	rs145144275	19	58861808	G	A	0.0087658	-2.14131	0.0309958	0	52363
Sun	AAMDC_Q9H7C9_OID30236	rs2186564	11	77583266	A	G	0.107993	-1.07303	0.00992227	0	52363
Sun	AARSD1_Q9BTE6_OID21311	rs71359594	17	41130727	TA	T	0.699702	-0.130006	0.00650004	2.70981e-89	52363
Sun	ABCA2_Q9BZC7_OID30146	-	9	139916879	T	C	0.0709978	-0.112139	0.0120404	6.18084e-21	52363
Sun	ABHD14B_Q96IU4_OID20921	rs373373105	3	52004097	CG	C	0.0110181	-1.43287	0.0303803	0	52363
Sun	ABL1_P00519_OID21280	rs2229067	9	133760592	T	C	0.0155478	-0.171464	0.0244444	1.15428e-12	52363
Sun	ABO_P16442_OID30675	rs505922	9	136149229	C	T	0.322838	1.16889	0.00659061	0	52363
Sun	ACAA1_P09110_OID21269	rs156265	3	38170810	G	C	0.140072	-0.133131	0.00893818	1.78543e-50	52363
Sun	ACADM_P11310_OID31277	rs143191741	1	76212891	CT	C	0.299708	0.140966	0.00681186	1.95325e-95	52363
Sun	ACADSB_P45954_OID30356	rs7913063	10	124798683	T	A	0.0860494	0.368378	0.0109878	1.00435e-246	52363
Sun	ACAN_P16112_OID20159	rs11073804	15	89252012	A	T	0.194785	0.130746	0.00721246	9.61579e-74	52363
Sun	ACE_P12821_OID30696	rs4343	17	61566031	A	G	0.49022	-0.46045	0.00615178	0	52363
Sun	ACE2_Q9BYF1_OID20105	rs5934255	X	15664386	A	G	0.291733	0.146135	0.00500302	7.37516e-188	52363
Sun	ACHE_P22303_OID30585	rs6976053	7	100512119	T	C	0.463753	0.305918	0.00592904	0	52363
Sun	ACOT13_Q9NPJ3_OID31522	rs143667676	6	24698187	T	G	0.00209826	-1.0437	0.0670758	6.80407e-55	52363
Sun	ACOX1_Q15067_OID20124	rs10852766	17	73951864	C	T	0.643964	0.0770189	0.0065907	7.51528e-32	52363
Sun	ACP1_P24666_OID30524	rs7605824	2	280819	A	G	0.345941	-0.376199	0.00646661	0	52363
Sun	ACP5_P13686_OID20314	rs2305799	19	11687351	T	C	0.120452	-0.500785	0.00896189	0	52363
Sun	ACP6_Q9NPH0_OID21432	rs2153463	1	147124310	G	T	0.700475	1.01463	0.00676501	0	52363
Sun	ACRBP_Q8NEB7_OID31385	rs7959658	12	6754191	G	A	0.348387	0.155897	0.00645704	4.34519e-129	52363
Sun	ACRV1_P26436_OID30513	rs113811036	11	125573435	C	CTT	0.19407	0.0720635	0.00506575	3.17635e-46	52363
Sun	ACTA2_P62736_OID20079	rs5786849	10	90753549	TAA	T	0.504426	-0.0516438	0.00551571	3.87383e-21	52363
Sun	ACVRL1_P37023_OID20999	rs77709482	12	52308021	C	T	0.0800646	0.5323	0.0107799	0	52363
Sun	ACY1_Q03154_OID20137	rs121912698	3	52022837	T	C	0.00427283	-1.65048	0.0442499	8.49618e-305	52363
Sun	ACY3_Q96HD9_OID30086	rs3758938	11	67402362	G	T	0.302434	0.264076	0.00669214	0	52363
Sun	ACYP1_P07311_OID30642	rs72734290	14	75519285	T	C	0.0104194	-1.24697	0.0297809	0	52363
Sun	ADA_P00813_OID20645	rs11555566	20	43255220	C	T	0.0627654	1.28967	0.0125069	0	52363
Sun	ADA2_Q9NZK5_OID20394	rs737963	22	17709771	C	T	0.623941	0.208994	0.00619434	7.6179e-250	52363
Sun	ADAM12_O43184_OID30491	rs35835884	10	127708468	A	G	0.403881	0.117298	0.00627075	2.22938e-78	52363
Sun	ADAM15_Q13444_OID20109	rs11589479	1	155033308	A	G	0.159395	1.01185	0.00836908	0	52363
Sun	ADAM22_Q9P0K1_OID21001	rs2279542	7	87564497	G	C	0.515937	-0.549271	0.00614914	0	52363
Sun	ADAM23_O75077_OID20651	rs1448903	2	207308961	G	A	0.0927326	0.900129	0.0105521	0	52363
Sun	ADAM8_P78325_OID21039	rs2995310	10	135082810	T	C	0.894364	-0.71037	0.00991364	0	52363
Sun	ADAM9_Q13443_OID31488	rs61753672	8	38869207	A	G	0.00541643	0.876234	0.0406704	2.96451e-103	52363
Sun	ADAMTS1_Q9UHI8_OID30528	rs400852	21	28216059	G	A	0.253162	0.0525499	0.00723457	1.88292e-13	52363
Sun	ADAMTS13_Q76LX8_OID20249	rs74715985	9	136304114	G	A	0.0164841	-1.47068	0.0236665	0	52363
Sun	ADAMTS15_Q8TE58_OID21275	rs73044885	11	130344063	A	G	0.053378	0.177943	0.0142331	3.6373e-36	52363
Sun	ADAMTS16_Q8TE57_OID20089	rs40468	5	4982814	G	A	0.3523	-0.125441	0.00601961	9.64533e-97	52363
Sun	ADAMTS4_O75173_OID30471	rs4564157	1	161178155	A	G	0.592708	-0.119001	0.00624891	3.72067e-81	52363
Sun	ADAMTS8_Q9UP79_OID21502	rs2131535	11	130281488	A	G	0.729207	0.493851	0.00688962	0	52363
Sun	ADAMTSL2_Q86TH1_OID30370	rs1008250	9	136397834	G	A	0.282015	0.106931	0.00693197	5.49156e-54	52363
Sun	ADAMTSL4_Q6UY14_OID30275	rs758689051	1	150755869	T	G	0.00179703	-2.53707	0.079435	3.84684e-224	52363
Sun	ADAMTSL5_Q6ZMM2_OID30355	rs791461	19	1507535	C	T	0.534976	0.400536	0.00667042	0	52363
Sun	ADD1_P35611_OID30655	rs1012365	4	2917608	A	G	0.185978	-0.179751	0.00757067	6.47722e-125	52363
Sun	ADGRB3_O60242_OID20974	rs3798969	6	69671585	G	A	0.626409	-0.916029	0.00633819	0	52363
Sun	ADGRD1_Q6QNK2_OID30588	rs4759533	12	131456252	A	G	0.927172	0.758144	0.0116242	0	52363
Sun	ADGRE1_Q14246_OID31483	rs59055395	19	6873522	C	T	0.122821	0.447772	0.00931493	0	52363
Sun	ADGRE2_Q9UHX3_OID20755	rs7251607	19	14506991	C	A	0.758047	0.278481	0.0068724	0	52363
Sun	ADGRE5_P48960_OID20260	rs139113505	19	14499616	T	C	0.0182814	-0.683543	0.0219068	4.95474e-214	52363
Sun	ADGRG1_Q9Y653_OID21294	rs8059267	16	57680860	C	T	0.407058	0.0763991	0.00592241	2.25043e-38	52363
Sun	ADGRG2_Q8IZP9_OID20189	rs5955525	X	19155322	A	C	0.00902899	0.278619	0.0305784	4.05775e-20	52363
Sun	ADH1B_P00325_OID30612	rs2066702	4	100229017	A	G	0.0067907	-0.92209	0.0403998	1.32092e-115	52363
Sun	ADH4_P08319_OID20117	rs1800759	4	100065509	G	T	0.604001	0.130724	0.00610556	5.31613e-102	52363
Sun	ADIPOQ_Q15848_OID30748	rs76786086	3	186559808	T	C	0.0256836	-0.613204	0.0165594	1.84524e-300	52363
Sun	ADM_P35318_OID21467	rs2403310	11	10363271	C	G	0.466599	0.150038	0.00560945	6.6256e-158	52363
Sun	AFAP1_Q8N556_OID30569	rs41264705	4	7780582	T	C	0.283144	1.08271	0.00688319	0	52363
Sun	AFM_P43652_OID30741	rs553977556	4	74257793	A	G	0.0012578	-2.13994	0.0907732	3.51371e-123	52363
Sun	AFP_P02771_OID20978	rs16849384	4	74302870	C	T	0.398368	-0.18758	0.00579288	2.53025e-230	52363
Sun	AGR2_O95994_OID20896	rs7807123	7	16856549	T	C	0.557238	0.100779	0.0062937	5.21116e-58	52363
Sun	AGRN_O00468_OID20786	rs3121560	1	968226	A	C	0.334492	-0.363801	0.0063232	0	52363
Sun	AGRP_O00253_OID20658	rs142099452	16	67929068	T	C	0.000562078	1.67192	0.1286	6.04298e-39	52363
Sun	AGT_P01019_OID30709	rs4762	1	230845977	A	G	0.116396	0.710977	0.00950971	0	52363
Sun	AGXT_P21549_OID20139	rs55649245	2	241793545	A	G	0.31933	-0.280817	0.00655098	0	52363
Sun	AHCY_P23526_OID20199	rs13043752	20	32883308	A	G	0.0156801	-1.36144	0.0245445	0	52363
Sun	AHNAK_Q09666_OID30260	rs145590149	11	62303555	TCTC	T	0.0348602	-0.495879	0.0168474	1.02188e-190	52363
Sun	AHNAK2_Q8IVF2_OID30244	rs10873552	14	105433129	G	A	0.638829	0.210924	0.00641107	1.10007e-237	52363
Sun	AHSG_P02765_OID30706	rs1900618	3	186338135	T	C	0.648754	0.668328	0.00649751	0	52363
Sun	AHSP_Q9NZD4_OID21078	rs530834027	16	31586949	T	C	0.000542122	-1.47102	0.143328	5.15541e-25	52363
Sun	AIF1L_Q9BQI0_OID30204	-	9	133931427	T	TA	0.700599	-0.315342	0.00693772	0	52363
Sun	AK1_P00568_OID20122	rs116977475	9	130627752	T	C	0.0402652	0.114196	0.0153494	5.04305e-14	52363
Sun	AK2_P54819_OID31142	rs138577419	1	33502381	C	G	0.00264179	-0.769464	0.0596813	2.46818e-38	52363
Sun	AKR1B1_P15121_OID21244	rs2229542	7	134135621	C	T	0.0135848	-0.599759	0.0270697	4.55533e-109	52363
Sun	AKR1C4_P17516_OID20062	-	10	5325577	A	AC	0.166441	-0.0740477	0.00853025	1.96841e-18	52363
Sun	AKR7L_Q8NHP1_OID30488	rs61764920	1	19611978	G	A	0.0909815	-0.314245	0.0107731	2.36994e-187	52363
Sun	AKT3_Q9Y243_OID21197	rs320339	1	243870910	T	G	0.196877	0.06989	0.00795907	8.08866e-19	52363
Sun	ALCAM_Q13740_OID20273	rs34926152	3	105264176	T	G	0.047466	-0.288336	0.0131804	2.1931e-106	52363
Sun	ALDH1A1_P00352_OID21128	rs348463	9	75547612	C	T	0.27399	0.0891548	0.00655244	1.8356e-42	52363
Sun	ALDH3A1_P30838_OID20512	rs4646787	17	19649249	G	A	0.659576	0.473504	0.00631295	0	52363
Sun	ALDH5A1_P51649_OID31047	rs2744581	6	24502484	G	A	0.518509	-0.147127	0.00622242	6.69755e-124	52363
Sun	ALPP_P05187_OID21383	rs12478529	2	233286654	T	C	0.238271	0.491871	0.00708386	0	52363
Sun	AMBN_Q9NP70_OID20437	-	4	71378930	T	TA	0.754986	0.080219	0.00731138	2.61111e-28	52363
Sun	AMBP_P02760_OID21413	rs147941577	9	116831989	G	A	0.00287149	-1.63311	0.0530616	2.61127e-208	52363
Sun	AMIGO1_Q86WK6_OID30881	rs546446390	1	110095966	TA	T	0.487814	-0.0430416	0.00632343	4.99364e-12	52363
Sun	AMIGO2_Q86SJ2_OID21370	rs215384	12	47760201	G	C	0.40602	0.146494	0.00621161	2.81923e-123	52363
Sun	AMN_Q9BXJ7_OID20492	rs2295829	14	103389003	C	G	0.392728	0.752122	0.00694275	0	52363
Sun	AMOTL2_Q9Y2J4_OID31351	rs1353778	3	134088443	T	A	0.626487	0.0525225	0.00641344	1.31219e-16	52363
Sun	AMPD3_Q01432_OID31139	rs117706710	11	10508903	T	G	0.00847127	-1.73077	0.0322761	0	52363
Sun	AMY1A_AMY1B_AMY1C_P0DUB6_P0DTE7_P0DTE8_OID30707	rs72694438	1	104364878	A	G	0.205271	0.389475	0.00769089	0	52363
Sun	AMY2A_P04746_OID20333	rs12075086	1	104310838	T	C	0.0931105	0.594301	0.0107057	0	52363
Sun	AMY2B_P19961_OID20340	rs12080068	1	104329823	A	C	0.0931026	0.653726	0.010919	0	52363
Sun	ANG_P03950_OID20403	rs4982325	14	21156836	T	C	0.11822	0.651891	0.00916531	0	52363
Sun	ANGPT1_Q15389_OID20740	rs6993770	8	106581528	T	A	0.292053	-0.18664	0.00665145	1.50614e-173	52363
Sun	ANGPT2_O15123_OID21463	rs1968586	8	6279511	T	C	0.33842	-0.148882	0.00644547	2.3855e-118	52363
Sun	ANGPTL1_O95841_OID20211	rs4511075	1	178518636	A	G	0.520914	-0.281562	0.00613433	0	52363
Sun	ANGPTL2_Q9UKU9_OID20726	rs2789512	9	129855105	G	T	0.718716	-0.0607776	0.00662196	2.19201e-20	52363
Sun	ANGPTL3_Q9Y5C1_OID20407	rs775677524	1	63070537	A	AGTTAATGTG	0.353976	-0.281674	0.00587845	0	52363
Sun	ANGPTL4_Q9BY76_OID20703	rs2278236	19	8431581	A	G	0.510742	0.271103	0.00605509	0	52363
Sun	ANGPTL7_O43827_OID21412	rs28991009	1	11253684	T	G	0.00757178	-2.16169	0.0341375	0	52363
Sun	ANKMY2_Q8IV38_OID30518	rs3807505	7	16684247	C	G	0.371245	0.0835655	0.00687786	2.87083e-34	52363
Sun	ANKRD54_Q6NXT1_OID21162	rs35496925	22	38424607	G	A	0.0557565	0.145081	0.0135064	3.24378e-27	52363
Sun	ANPEP_P15144_OID20350	rs1042499	15	90328305	C	T	0.0582743	0.816673	0.0130104	0	52363
Sun	ANXA1_P04083_OID30617	rs2795108	9	75765478	C	T	0.144999	0.0627552	0.0086842	2.48046e-13	52363
Sun	ANXA10_Q9UJ72_OID20886	rs2319713	4	169081189	G	A	0.594999	0.0456899	0.00624513	1.27655e-13	52363
Sun	ANXA11_P50995_OID20583	rs2784773	10	81919800	C	T	0.643704	0.0631049	0.00646051	7.73964e-23	52363
Sun	ANXA2_P07355_OID30263	rs8033800	15	60689179	A	T	0.595339	-0.453807	0.00628663	0	52363
Sun	ANXA3_P12429_OID21036	rs146728751	4	79500235	A	G	0.0016352	-1.25223	0.074332	5.57063e-64	52363
Sun	ANXA4_P09525_OID20123	rs13429773	2	69969133	A	G	0.00336695	0.937063	0.0585103	4.99207e-58	52363
Sun	ANXA5_P08758_OID20810	rs73844249	4	122595981	A	C	0.282577	-0.110117	0.00696719	1.43511e-56	52363
Sun	AOC1_P19801_OID20452	rs1049742	7	150554553	T	C	0.0784498	0.50754	0.011632	0	52363
Sun	AOC3_Q16853_OID20389	rs33986943	17	41004637	A	G	0.105303	-0.85493	0.00954739	0	52363
Sun	AP1G2_O75843_OID31348	rs28403575	14	24025340	T	C	0.0895054	-0.201208	0.0106229	2.62126e-80	52363
Sun	AP3B1_O00203_OID31478	rs11746090	5	77339846	A	G	0.295311	-0.0562521	0.00672314	2.95672e-17	52363
Sun	APBB1IP_Q7Z5R6_OID21359	rs4749125	10	26727636	C	G	0.604913	-0.216061	0.00621318	2.94218e-265	52363
Sun	APCS_P02743_OID30778	rs36126250	1	159563701	G	T	0.0233531	-0.543398	0.0189832	1.63179e-180	52363
Sun	APEX1_P27695_OID21434	rs1130409	14	20925154	G	T	0.469463	-0.392344	0.00591177	0	52363
Sun	APOA1_P02647_OID30769	rs2727784	11	116711141	T	C	0.624961	-0.065997	0.00611128	1.73588e-27	52363
Sun	APOA2_P02652_OID30686	rs4073054	1	161200487	A	C	0.635283	0.0648035	0.00615291	3.07009e-26	52363
Sun	APOA4_P06727_OID30733	rs1729405	11	116678760	T	C	0.523936	0.136455	0.00617791	2.08109e-108	52363
Sun	APOBR_Q0VD83_OID30246	rs180744	16	28508048	G	A	0.403634	-1.1181	0.00634593	0	52363
Sun	APOC1_P02654_OID30749	rs5112	19	45430280	G	C	0.535752	0.333144	0.00621954	0	52363
Sun	APOD_P05090_OID30746	rs139828053	3	195298892	C	T	0.0297869	-0.523587	0.0182911	1.6305e-180	52363
Sun	APOE_P02649_OID30727	rs429358	19	45411941	C	T	0.15891	-0.989696	0.00828304	0	52363
Sun	APOF_Q13790_OID30701	rs4301822	12	56755058	G	A	0.0188808	-1.18089	0.0319452	2.00646e-299	52363
Sun	APOH_P02749_OID21072	rs1801689	17	64210580	C	A	0.029825	-1.4779	0.0180798	0	52363
Sun	APOL1_O14791_OID30708	rs2239785	22	36661330	A	G	0.797158	-0.306075	0.00684398	0	52363
Sun	APP_P05067_OID21070	rs8131895	21	27503527	A	C	0.643152	-0.0689126	0.00642245	3.6816e-27	52363
Sun	APPL2_Q8NEU8_OID30590	rs759167654	12	105618649	A	AAAGTACTTTT	0.188021	0.162304	0.00785655	4.09922e-95	52363
Sun	APRT_P07741_OID20927	rs8191470	16	88878176	A	C	0.00240408	-0.99133	0.0657092	9.91668e-52	52363
Sun	AREG_P15514_OID21357	rs1691273	4	75323645	T	C	0.695218	-0.163436	0.00665519	1.79047e-133	52363
Sun	ARFIP1_P53367_OID31024	rs4619875	4	153701130	T	C	0.398124	0.154976	0.00624402	2.73317e-136	52363
Sun	ARG1_P05089_OID21445	rs2781668	6	131897278	T	C	0.165166	-0.235855	0.00804544	3.30388e-189	52363
Sun	ARG2_P78540_OID31339	rs140881784	14	68132084	C	G	0.0072743	-0.401997	0.0397018	2.13095e-24	52363
Sun	ARHGAP25_P42331_OID21255	rs13413887	2	68996668	G	A	0.753955	0.103302	0.00722515	1.13312e-46	52363
Sun	ARHGAP45_Q92619_OID30653	rs34593562	19	1083556	G	A	0.43246	-0.0710844	0.0062259	1.70905e-30	52363
Sun	ARHGEF10_O15013_OID30994	rs13281104	8	1811923	G	A	0.238632	0.310055	0.00712143	0	52363
Sun	ARHGEF5_Q12774_OID30871	rs1635893	7	143877476	G	A	0.204795	-0.517837	0.00792238	0	52363
Sun	ARL2BP_Q9Y2Y0_OID30121	rs7198865	16	57283730	A	G	0.0338084	-0.723174	0.0172853	0	52363
Sun	ARSA_P15289_OID21138	rs873697	22	51064169	A	G	0.04551	1.4197	0.014226	0	52363
Sun	ARSB_P15848_OID21331	rs35632995	5	78197418	TA	T	0.428287	-0.300222	0.00627473	0	52363
Sun	ART3_Q13508_OID20346	-	4	77030398	C	CT	0.426429	0.259187	0.00566889	0	52363
Sun	ART5_Q96L15_OID30828	rs75902876	11	3663021	A	G	0.0821994	0.351966	0.01248	2.73191e-175	52363
Sun	ASAH1_Q13510_OID30415	rs2472205	8	17924739	T	A	0.0406917	-1.11127	0.0155068	0	52363
Sun	ASAH2_Q9NR71_OID20996	rs1877558	10	51992580	T	C	0.249055	-0.672661	0.0074049	0	52363
Sun	ASGR1_P07306_OID20990	rs55714927	17	7080316	T	C	0.188601	-0.187713	0.00763674	1.02724e-133	52363
Sun	ASGR2_P07307_OID30679	rs2304980	17	7012073	T	G	0.283642	0.31605	0.00660745	0	52363
Sun	ASPN_Q9BXN1_OID30315	-	9	95054463	C	CTTTT	0.340015	-0.238922	0.00645475	3.29598e-300	52363
Sun	ASPSCR1_Q9BZE9_OID31055	rs8074498	17	79954544	A	T	0.56708	-0.209913	0.00617954	3.19365e-253	52363
Sun	ASRGL1_Q7L266_OID30283	rs2302361	11	62158051	A	T	0.286709	-0.370779	0.00665742	0	52363
Sun	ASS1_P00966_OID30170	rs12352216	9	133319388	A	G	0.00288961	-0.438684	0.0597188	1.02245e-13	52363
Sun	ATG4A_Q8WYN0_OID21246	rs717711	X	107385105	T	C	0.462437	0.0781289	0.0050516	2.93489e-54	52363
Sun	ATOX1_O00244_OID21476	rs111445645	5	151154491	CT	C	0.424667	-0.0725575	0.00618222	4.14321e-32	52363
Sun	ATP5IF1_Q9UII2_OID20760	rs510379	1	28535233	C	T	0.363501	0.108612	0.0064113	1.12686e-64	52363
Sun	ATRAID_Q6UW56_OID31451	rs1659701	2	27414877	C	T	0.691717	-0.27557	0.00654181	0	52363
Sun	ATRN_O75882-2_OID30735	rs180821996	20	3535672	T	C	0.0507104	-1.29486	0.013707	0	52363
Sun	ATXN10_Q9UBB4_OID20865	rs9626183	22	46041194	G	C	0.290647	0.096121	0.00686044	6.68415e-45	52363
Sun	ATXN3_P54252_OID31149	rs7153193	14	92536694	A	C	0.253706	-0.303414	0.0068448	0	52363
Sun	AXIN1_O15169_OID20582	rs6600211	16	358773	A	G	0.47896	0.0442542	0.00602418	1.0204e-13	52363
Sun	AXL_P30530_OID20363	rs74816457	19	41739534	C	G	0.394658	-0.165694	0.0061459	2.17232e-160	52363
Sun	AZU1_P20160_OID20309	-	19	831815	G	GT	0.0106727	-1.18622	0.0296014	0	52363
Sun	B3GNT7_Q8NFL0_OID30281	rs2290130	2	232263127	A	G	0.230128	-0.731028	0.00703726	0	52363
Sun	B4GALT1_P15291_OID20780	rs7019909	9	33113322	T	C	0.109582	0.314188	0.00947984	3.60126e-241	52363
Sun	B4GAT1_O43505_OID21127	rs10896113	11	66117111	T	C	0.216753	-0.300333	0.0071531	0	52363
Sun	BACH1_O14867_OID20505	rs368322	21	30717151	T	C	0.606625	0.0461415	0.00621598	5.72289e-14	52363
Sun	BAG3_O95817_OID20972	rs35434411	10	121429394	A	G	0.0288718	0.18797	0.018257	3.68114e-25	52363
Sun	BAIAP2_Q9UQB8_OID21250	rs56239087	17	78970499	T	C	0.180745	0.0861511	0.00802937	3.6999e-27	52363
Sun	BAMBI_Q13145_OID21267	rs1034086	10	28934523	C	A	0.565873	-0.0422395	0.00625476	7.23213e-12	52363
Sun	BANK1_Q8NDB2_OID20594	rs3113676	4	102965043	C	T	0.98581	0.457074	0.0254331	1.62542e-72	52363
Sun	BAP18_Q8IXM2_OID31150	rs2307215	17	6902459	C	T	0.0682305	-0.101415	0.011934	9.64517e-18	52363
Sun	BCAM_P50895_OID21076	rs28399657	19	45318351	G	A	0.0320067	-0.617966	0.0165689	9.26629e-305	52363
Sun	BCAN_Q96GW7_OID20998	rs2365715	1	156615114	G	A	0.386126	-0.233989	0.0064181	2.59974e-291	52363
Sun	BCAT1_P54687_OID30312	rs11047635	12	24948166	C	T	0.28856	0.284731	0.00669721	0	52363
Sun	BCHE_P06276_OID30717	rs1803274	3	165491280	T	C	0.20708	-0.573252	0.00728685	0	52363
Sun	BCL2_P10415_OID31454	rs1800477	18	60985773	T	C	0.00224465	-1.91768	0.0695444	1.11288e-167	52363
Sun	BCL2L15_Q5TBC7_OID30498	rs17464525	1	114443899	A	G	0.181609	0.203246	0.00785738	7.85501e-148	52363
Sun	BCR_P11274_OID20558	rs149005797	22	23485100	C	T	0.00405451	-0.532827	0.0552474	2.59616e-22	52363
Sun	BDNF_P23560_OID30373	rs79637814	11	27779741	C	T	0.0424613	0.142852	0.0150209	9.51337e-22	52363
Sun	BGLAP_P02818_OID30389	rs369453512	1	156293105	GA	G	0.542224	0.124765	0.00597892	5.28809e-97	52363
Sun	BID_P55957_OID20517	rs183393610	22	18252442	A	G	0.00679037	-0.37687	0.0400231	2.33605e-21	52363
Sun	BIN2_Q9UBW5_OID21067	-	12	51695791	G	GT	0.101872	-0.179861	0.0100388	4.37709e-72	52363
Sun	BIRC2_Q13490_OID21217	rs61754131	11	102248406	G	A	0.00209692	-0.696158	0.0672672	2.1112e-25	52363
Sun	BLMH_Q13867_OID20336	rs1050565	17	28576076	C	T	0.324719	0.583245	0.00637589	0	52363
Sun	BLNK_Q8WV28_OID30541	rs1902708	10	98004532	T	C	0.962757	0.140918	0.0165279	7.57031e-18	52363
Sun	BLVRB_P30043_OID21141	rs149698066	19	40964064	A	G	0.00584668	-1.39845	0.0432288	6.94536e-230	52363
Sun	BMP10_O95393_OID30575	rs34008398	2	69093413	A	G	0.0124496	-2.03542	0.0265978	0	52363
Sun	BMP6_P22004_OID20111	rs12198986	6	7720059	A	G	0.469514	0.137951	0.00612706	1.47836e-112	52363
Sun	BMPER_Q8N8U9_OID30615	rs201897458	7	33783208	T	C	0.0792127	-0.334532	0.0114747	3.73005e-187	52363
Sun	BNIP3L_O60238_OID30525	-	8	26267455	G	GT	0.629602	0.0518692	0.00644318	4.13131e-16	52363
Sun	BOC_Q9BWV1_OID20116	rs3856718	3	112996218	A	G	0.173905	0.200916	0.00806666	3.12699e-137	52363
Sun	BOLA1_Q9Y3E2_OID30837	rs1376675	1	149871002	A	G	0.0754286	-0.192013	0.0115501	2.32156e-62	52363
Sun	BOLA2_BOLA2B_Q9H3K6_OID30267	rs144009214	16	30355080	T	C	0.0181193	-0.244124	0.0232284	3.89619e-26	52363
Sun	BPIFA2_Q96DR5_OID30279	rs6059134	20	31754236	A	T	0.043347	-0.431683	0.0144871	2.08885e-195	52363
Sun	BPIFB1_Q8TDL5_OID20308	rs2424957	20	31693553	C	T	0.57562	-0.418115	0.00599532	0	52363
Sun	BPIFB2_Q8N4F0_OID30311	rs2377736	20	31582444	C	T	0.411283	0.273512	0.0060641	0	52363
Sun	BRSK2_Q8IWQ3_OID31042	rs7395567	11	1413056	C	T	0.719154	-0.589435	0.00692281	0	52363
Sun	BSG_P35613_OID20626	rs56101188	19	586745	C	T	0.0925856	0.218461	0.0102111	7.52262e-102	52363
Sun	BST1_Q10588_OID21051	rs2302465	4	15709192	A	G	0.123615	-1.51571	0.0093205	0	52363
Sun	BST2_Q10589_OID21029	rs4808628	19	17487620	A	G	0.953873	-0.322674	0.0145489	2.76459e-109	52363
Sun	BTC_P35070_OID21199	rs28549760	4	75719517	C	A	0.147136	-0.600832	0.00890642	0	52363
Sun	BTD_P43251_OID30754	rs13078881	3	15686693	C	G	0.0422661	-1.63555	0.0151461	0	52363
Sun	C19orf12_Q9NSK7_OID20804	rs146170087	19	30193654	C	T	0.00110353	-1.01736	0.0927867	2.83055e-28	52363
Sun	C1GALT1C1_Q96EU7_OID30180	rs149340486	X	119760720	T	C	0.00949787	-0.694178	0.0267133	3.54338e-149	52363
Sun	C1QA_P02745_OID20654	rs12058824	1	22963050	A	G	0.0808357	-0.621184	0.0109855	0	52363
Sun	C1QL2_Q7Z5L3_OID30515	rs34171180	2	119917240	C	T	0.202705	-0.269463	0.00736913	4.88224e-293	52363
Sun	C1QTNF1_Q9BXJ1_OID20367	rs116539064	17	77018400	T	C	0.095826	0.387251	0.0104858	7.3531e-299	52363
Sun	C1QTNF5_Q9BXJ0_OID30618	rs2509656	11	119208576	A	G	0.14329	0.154688	0.00849736	2.38808e-74	52363
Sun	C1QTNF6_Q9BXI9_OID31049	rs535685845	22	37584323	AGGAGGGAGAGAGGAGGGGAT	A	0.0597969	-0.16856	0.0139138	4.42019e-34	52363
Sun	C1QTNF9_P0C862_OID30620	rs1961993	13	24891017	A	C	0.799198	1.12877	0.00779773	0	52363
Sun	C1R_P00736_OID30753	rs12146727	12	7170336	A	G	0.132419	-0.4481	0.00900864	0	52363
Sun	C1RL_Q9NZP8_OID30721	rs191448232	12	7254686	C	G	0.0117152	-2.1851	0.0285753	0	52363
Sun	C1S_P09871_OID30731	rs12371227	12	7176978	T	C	0.134847	-0.652131	0.00895256	0	52363
Sun	C2CD2L_O14523_OID20864	rs2509049	11	118966521	T	C	0.422917	-0.0526992	0.00637451	6.85843e-17	52363
Sun	C2orf69_Q8N8R5_OID30883	rs75214378	2	200785658	A	G	0.0419644	0.222852	0.0155757	9.79827e-47	52363
Sun	C3_P01024_OID30776	rs5826945	19	6697088	T	A	0.140648	-0.156771	0.00902516	6.90813e-68	52363
Sun	C4BPB_P20851_OID21481	rs3813948	1	207269858	C	T	0.0750244	-0.294784	0.0109798	4.46851e-159	52363
Sun	C5_P01031_OID30744	rs7030849	9	123969834	T	C	0.573469	-0.14421	0.00629543	1.97415e-116	52363
Sun	C7_P10643_OID30766	rs74480769	5	40972211	G	A	0.0289784	-1.45256	0.01867	0	52363
Sun	C7orf50_Q9BRJ6_OID31095	rs200169409	7	1037382	G	GC	0.0275779	-0.95113	0.0186985	0	52363
Sun	C8B_P07358_OID30719	rs626457	1	57407484	T	C	0.330216	0.504495	0.00642252	0	52363
Sun	C9_P02748_OID30698	rs34000044	5	39342214	T	G	0.00140829	-1.38391	0.0807994	4.60939e-66	52363
Sun	CA1_P00915_OID20409	rs1532424	8	86268192	T	G	0.555414	-0.0814351	0.00596433	9.59576e-43	52363
Sun	CA11_O75493_OID21195	-	19	49115918	C	CAA	0.208848	0.0705704	0.00775215	4.38008e-20	52363
Sun	CA12_O43570_OID21344	rs12916532	15	63674171	C	T	0.272546	-0.28211	0.00685875	0	52363
Sun	CA13_Q8N1Q1_OID20225	rs60087251	8	86202523	C	A	0.0648466	-0.515256	0.0124904	0	52363
Sun	CA14_Q9ULX7_OID21401	rs140320147	1	150230578	T	G	0.00170098	-2.00344	0.0704526	3.55772e-178	52363
Sun	CA2_P00918_OID21149	rs2980370	8	86860127	G	A	0.500991	0.0970206	0.00596493	8.71913e-60	52363
Sun	CA3_P07451_OID20271	rs2072696	8	86351051	C	G	0.241161	-0.170325	0.00679479	5.69741e-139	52363
Sun	CA4_P22748_OID20241	rs117154637	17	58234154	T	A	0.0360973	-0.816211	0.0162941	0	52363
Sun	CA5A_P35218_OID20075	rs55870502	16	87927222	C	T	0.199163	0.808502	0.00759786	0	52363
Sun	CA6_P23280_OID21096	rs3765963	1	9034598	G	A	0.422834	0.671305	0.00592092	0	52363
Sun	CA9_Q16790_OID21417	rs183985235	9	35677780	A	C	0.00224107	-1.42617	0.0710186	5.34042e-90	52363
Sun	CACNB3_P54284_OID31039	rs7975385	12	49190992	C	T	0.24475	0.121035	0.00718065	4.76235e-64	52363
Sun	CACYBP_Q9HB71_OID30649	rs76088187	1	174845008	G	A	0.115735	-0.176524	0.00962466	1.95487e-75	52363
Sun	CALB1_P05937_OID21306	rs143241372	8	91123583	G	A	0.00864311	0.648179	0.0336951	9.14153e-83	52363
Sun	CALB2_P22676_OID20801	-	16	71170669	C	CA	0.288571	-0.0690214	0.00686678	4.52424e-24	52363
Sun	CALCA_P01258_OID20983	rs782744846	11	14930225	T	TTCTAAG	0.443707	-0.102922	0.00506004	2.83752e-92	52363
Sun	CALCB_P10092_OID31100	rs4757282	11	15126744	T	G	0.757294	-0.131509	0.00712083	1.86104e-76	52363
Sun	CALCOCO1_Q9P1Z2_OID21387	rs17102261	12	54126732	G	T	0.163728	0.13264	0.00815729	9.44023e-60	52363
Sun	CALCOCO2_Q13137_OID30249	rs606911	17	46908228	A	G	0.15827	0.0734897	0.00833167	5.69624e-19	52363
Sun	CAMKK1_Q8N5S9_OID21182	rs753513	17	3793472	T	C	0.277526	-0.285649	0.00694816	0	52363
Sun	CANT1_Q8WVQ1_OID20181	rs80269200	17	76996508	A	C	0.117308	-0.209308	0.00941308	7.72761e-110	52363
Sun	CAPG_P40121_OID21431	rs6886	2	85622059	C	T	0.661686	-0.852877	0.0063691	0	52363
Sun	CAPS_Q13938_OID31126	rs147363394	19	5915300	A	C	0.00146224	-2.16441	0.0752865	4.66387e-182	52363
Sun	CARHSP1_Q9Y2V2_OID20859	rs12597479	16	8903589	T	G	0.513319	-0.0813992	0.00605601	1.7371e-41	52363
Sun	CASP1_P29466_OID20854	rs67513506	11	104911713	A	G	0.16994	-0.0596786	0.00813888	1.12922e-13	52363
Sun	CASP10_Q92851_OID20893	rs2881930	2	202075752	C	T	0.483335	0.179192	0.00624206	1.55152e-181	52363
Sun	CASP3_P42574_OID20305	-	4	185573560	G	GA	0.714373	0.130451	0.00684875	3.45123e-81	52363
Sun	CASP7_P55210_OID31135	rs141266925	10	115485285	C	T	0.0028855	-1.16787	0.0570547	2.02177e-93	52363
Sun	CASP8_Q14790_OID21414	rs1045485	2	202149589	C	G	0.130712	0.313694	0.00890371	3.25606e-272	52363
Sun	CASP9_P55211_OID30530	rs544033162	1	15856841	CA	C	0.528957	-0.0808273	0.00629422	4.79909e-38	52363
Sun	CAT_P04040_OID30712	rs1408035	11	34475749	T	A	0.220945	-0.181901	0.00701394	1.37021e-148	52363
Sun	CBLIF_P27352_OID20179	rs1787909	11	60970043	C	G	0.343643	-0.219878	0.00608077	1.31602e-286	52363
Sun	CBLN4_Q9NTU7_OID21386	rs12624596	20	54290016	A	G	0.283689	0.18563	0.00680289	3.03111e-164	52363
Sun	CBS_P35520_OID30200	rs6586281	21	44478393	A	G	0.175619	0.155972	0.00809659	5.39544e-83	52363
Sun	CC2D1A_Q6P1N0_OID20958	rs61740117	19	14024269	T	C	0.012738	-0.325775	0.026645	1.12205e-34	52363
Sun	CCDC134_Q9H6E4_OID31413	rs139565	22	42199047	G	A	0.574927	0.0590989	0.00625689	1.77005e-21	52363
Sun	CCDC50_Q8IVM0_OID31001	rs35380043	3	191087740	T	A	0.0469337	-0.403099	0.0145621	5.8505e-169	52363
Sun	CCDC80_Q76M96_OID20226	rs6438087	3	112366816	A	G	0.632787	-0.0644059	0.00577241	3.28931e-29	52363
Sun	CCER2_I3L3R5_OID30221	rs190921775	19	39402296	T	G	0.00446305	-0.919951	0.0455067	3.55948e-91	52363
Sun	CCL11_P51671_OID20668	rs144327946	17	32515530	T	C	0.222548	-0.113055	0.00693379	4.55174e-60	52363
Sun	CCL13_Q99616_OID20655	rs3136674	17	32682616	C	T	0.0569167	-0.473716	0.0128854	3.50177e-296	52363
Sun	CCL14_Q16627_OID20401	rs9903158	17	34312337	C	T	0.0550921	-0.997107	0.0131363	0	52363
Sun	CCL15_Q16663_OID20328	-	17	34328646	C	CAGGGCAG	0.911443	-1.50011	0.0106946	0	52363
Sun	CCL16_O15467_OID20334	rs112689088	17	34307457	C	T	0.101443	-1.20262	0.00983445	0	52363
Sun	CCL17_Q92583_OID20745	rs9302690	16	57442968	A	G	0.0960569	0.378907	0.010507	4.41777e-285	52363
Sun	CCL18_P55774_OID20395	rs2015086	17	34391617	G	A	0.143424	0.679921	0.00867538	0	52363
Sun	CCL19_Q99731_OID21030	rs11574915	9	34710084	C	A	0.123535	0.106145	0.00906913	6.07998e-32	52363
Sun	CCL2_P13500_OID21004	rs12601658	17	32533423	A	T	0.233007	-0.0693641	0.00679114	8.58986e-25	52363
Sun	CCL20_P78556_OID20671	rs1395338	2	228648323	A	G	0.586238	0.0855181	0.00619461	1.18485e-43	52363
Sun	CCL21_O00585_OID20686	rs2812378	9	34710260	A	G	0.655999	0.100692	0.00627116	2.57979e-58	52363
Sun	CCL22_O00626_OID20765	rs41398344	16	57394393	C	T	0.00919067	-0.797515	0.0318973	2.865e-138	52363
Sun	CCL23_P55773_OID20693	rs712048	17	34326215	C	A	0.84335	0.535187	0.00853659	0	52363
Sun	CCL24_O00175_OID20772	rs2868169	7	75464349	T	C	0.899267	-1.37335	0.0100273	0	52363
Sun	CCL25_O15444_OID20674	rs2032887	19	8121360	G	A	0.235959	0.75923	0.00694788	0	52363
Sun	CCL26_Q9Y258_OID20546	rs41463245	7	75401263	T	C	0.00878295	-0.974693	0.0322546	6.72166e-201	52363
Sun	CCL27_Q9Y4X3_OID20121	rs2070074	9	34649442	G	A	0.0961584	-0.311544	0.0098317	1.14748e-220	52363
Sun	CCL28_Q9NRJ3_OID20569	-	5	44399046	G	GT	0.381481	-0.0515209	0.00614479	2.54741e-17	52363
Sun	CCL3_P10147_OID20610	rs1634486	17	34410091	C	A	0.219564	0.419724	0.00711565	0	52363
Sun	CCL4_P13236_OID20695	rs1015673	17	34477386	T	C	0.443496	-0.303626	0.00683074	0	52363
Sun	CCL5_P13501_OID20412	rs2107538	17	34207780	T	C	0.193322	-0.230746	0.00769727	9.60089e-198	52363
Sun	CCL7_P80098_OID20523	rs9907136	17	32516245	T	C	0.649458	0.0967573	0.00609417	4.57049e-57	52363
Sun	CCL8_P80075_OID21466	rs1133763	17	32647831	C	A	0.158406	-1.06584	0.00831238	0	52363
Sun	CCN1_O00622_OID21368	rs4949912	1	86063089	A	G	0.266095	-0.129618	0.00676716	4.48384e-82	52363
Sun	CCN2_P29279_OID20709	rs7767139	6	132292781	G	C	0.226593	-0.342748	0.00737134	0	52363
Sun	CCN3_P48745_OID20299	rs2279112	8	120429024	A	G	0.271667	-0.26405	0.00640919	0	52363
Sun	CCN4_O95388_OID21444	rs12156037	8	134204458	G	A	0.348082	-0.440484	0.00637839	0	52363
Sun	CCN5_O76076_OID21068	rs6065746	20	43322002	C	G	0.546937	0.189054	0.00566166	8.96435e-245	52363
Sun	CCND2_P30279_OID31316	rs76895963	12	4384844	G	T	0.020038	0.168971	0.0245577	2.98065e-12	52363
Sun	CCS_O14618_OID20973	rs498045	11	66362997	G	A	0.511968	0.466453	0.00607796	0	52363
Sun	CD101_Q93033_OID31480	rs12130298	1	117544331	C	A	0.0708137	-1.28982	0.0120079	0	52363
Sun	CD109_Q6YHK3_OID21108	rs9447027	6	74501170	G	C	0.356368	0.844712	0.00629714	0	52363
Sun	CD14_P08571_OID20378	rs5744441	5	140016847	A	G	0.227735	-0.312667	0.00719978	0	52363
Sun	CD160_O95971_OID20647	rs3753437	1	145718124	C	G	0.450638	-0.388869	0.00606893	0	52363
Sun	CD163_Q86VB7_OID20360	rs11054859	12	7769776	A	G	0.114215	-0.175013	0.0091671	1.48771e-81	52363
Sun	CD164_Q04900_OID21080	rs12197114	6	109735498	C	T	0.329015	-0.148743	0.00649522	2.30297e-116	52363
Sun	CD164L2_Q6UWJ8_OID30922	rs734725	1	27709858	T	G	0.0841527	0.781571	0.0113769	0	52363
Sun	CD177_Q8N6Q3_OID21119	rs79338083	19	43826203	T	C	0.0178468	1.81153	0.0236198	0	52363
Sun	CD1C_P29017_OID21483	rs115248892	1	158262619	T	G	0.00261872	-1.56245	0.0564336	5.07334e-169	52363
Sun	CD2_P06729_OID30097	rs142374557	1	117297327	G	C	0.0104426	0.219424	0.030768	4.96169e-13	52363
Sun	CD200_P41217_OID20603	rs2399420	3	112069765	A	C	0.904371	0.267743	0.010099	3.53991e-155	52363
Sun	CD200R1_Q8TD46_OID20595	rs72491121	3	112643952	T	C	0.0410094	1.80202	0.0155758	0	52363
Sun	CD207_Q9UJ71_OID21298	rs17718987	2	71060936	C	G	0.310536	0.465194	0.00661296	0	52363
Sun	CD209_Q9NNX6_OID20262	rs4804774	19	7772173	C	G	0.245024	-0.418699	0.00612323	0	52363
Sun	CD22_P20273_OID20637	rs10411704	19	35800662	T	G	0.796822	-0.291387	0.00722285	0	52363
Sun	CD226_Q15762_OID30556	rs4891780	18	67524383	T	C	0.469716	-0.259478	0.00619285	0	52363
Sun	CD244_Q9BZW8_OID20628	rs115868021	1	160811374	G	C	0.00544859	-2.20125	0.0408136	0	52363
Sun	CD248_Q9HCU0_OID30394	rs182547559	11	66082215	G	C	0.00400562	-0.745722	0.0479963	9.73375e-55	52363
Sun	CD27_P26842_OID21527	rs25680	12	6554628	A	G	0.236193	0.288069	0.00698128	0	52363
Sun	CD274_Q9NZQ7_OID20966	rs822341	9	5453396	C	T	0.748606	0.339916	0.00697956	0	52363
Sun	CD276_Q5ZPR3_OID20680	rs2291014	15	73996359	A	G	0.107245	-1.29687	0.00975926	0	52363
Sun	CD28_P10747_OID21265	rs768558350	2	204633829	A	AG	0.163289	-0.24663	0.00828884	7.59093e-195	52363
Sun	CD2AP_Q9Y5K6_OID20177	rs9463335	6	47479136	A	G	0.266683	0.306247	0.0067187	0	52363
Sun	CD300A_Q9UGN4_OID30576	rs62087200	17	72459776	A	G	0.0538212	-0.580515	0.0127087	0	52363
Sun	CD300C_Q08708_OID21010	rs2293188	17	72537878	A	G	0.0990536	0.675368	0.00965531	0	52363
Sun	CD300E_Q496F6_OID21418	rs520733	17	72595825	A	G	0.672595	-0.351058	0.00620973	0	52363
Sun	CD300LF_Q8TDQ1_OID21469	rs35489971	17	72700943	G	A	0.795776	1.23758	0.00747382	0	52363
Sun	CD300LG_Q6UXG3_OID21130	rs72836561	17	41926126	T	C	0.0297564	-1.05367	0.0169585	0	52363
Sun	CD302_Q8IX05_OID21328	rs2556106	2	160654524	T	G	0.864338	-0.378822	0.00843645	0	52363
Sun	CD33_P20138_OID21472	rs2455069	19	51728641	G	A	0.421829	1.17569	0.00628534	0	52363
Sun	CD34_P28906_OID21025	rs6671850	1	208057800	T	C	0.0664444	0.139753	0.012038	1.8477e-31	52363
Sun	CD36_P16671_OID30485	rs13236689	7	80236014	G	T	0.417067	0.265993	0.00610637	0	52363
Sun	CD38_P28907_OID21316	rs7681718	4	15786408	T	C	0.223043	-0.409486	0.0060457	0	52363
Sun	CD4_P01730_OID20584	rs73053728	12	6896546	G	A	0.292272	-0.348333	0.0066075	0	52363
Sun	CD40_P25942_OID20724	rs1883832	20	44746982	C	T	0.756255	0.420751	0.0071451	0	52363
Sun	CD40LG_P29965_OID20616	rs36206512	X	135730217	C	A	0.0333673	-0.549965	0.0144882	0	52363
Sun	CD46_P15529_OID20380	rs7550273	1	207912179	C	G	0.400023	0.0786795	0.00620121	3.45649e-37	52363
Sun	CD48_P09326_OID20692	rs2295615	1	160654758	G	C	0.133977	-0.933125	0.00890844	0	52363
Sun	CD5_P06127_OID21449	rs34383631	11	60793330	T	C	0.396343	-0.128109	0.00611002	6.55954e-98	52363
Sun	CD55_P08174_OID20377	rs61822669	1	207421214	A	G	0.224806	-0.457063	0.00725752	0	52363
Sun	CD58_P19256_OID20716	rs6677309	1	117080166	C	A	0.14177	-0.251159	0.00874088	7.21124e-182	52363
Sun	CD59_P13987_OID20339	rs831636	11	33739598	A	G	0.323543	-0.228706	0.00611117	7.87841e-307	52363
Sun	CD5L_O43866_OID30775	rs2765501	1	157804648	A	G	0.389581	0.19908	0.00619679	9.46235e-227	52363
Sun	CD6_P30203_OID20649	rs11230563	11	60776209	T	C	0.348424	-0.807665	0.00624972	0	52363
Sun	CD63_P08962_OID20988	rs187372065	12	56191879	G	C	0.00264219	-0.714885	0.0637648	1.79483e-29	52363
Sun	CD69_Q07108_OID20206	rs3176787	12	9913134	A	G	0.451952	-0.0512959	0.00616866	4.56577e-17	52363
Sun	CD7_P09564_OID30543	rs3176831	17	80272491	T	C	0.0404252	-1.10539	0.0158315	0	52363
Sun	CD70_P32970_OID20599	rs7254538	19	6611336	C	G	0.546339	0.738612	0.00589662	0	52363
Sun	CD72_P21854_OID30641	rs869487	9	35615896	G	C	0.217733	-0.161179	0.00736279	1.5817e-106	52363
Sun	CD74_P04233_OID21040	rs55796634	5	149792337	T	C	0.104839	-0.0872103	0.00931147	3.77023e-21	52363
Sun	CD79B_P40259_OID20635	rs12603821	17	62006432	A	G	0.382291	-0.160358	0.00607644	8.8946e-154	52363
Sun	CD80_P33681_OID30291	rs150475322	3	119286056	G	A	0.11824	0.594143	0.00914126	0	52363
Sun	CD83_Q01151_OID20565	rs111804875	6	14118034	A	G	0.211863	0.196675	0.00727005	1.77162e-161	52363
Sun	CD84_Q9UIB8_OID20607	rs200682634	1	160560109	C	CAT	0.902865	-0.210812	0.0105179	1.15783e-89	52363
Sun	CD86_P42081_OID31500	rs59331099	3	121824624	C	T	0.00215355	1.95298	0.0687241	6.11338e-178	52363
Sun	CD8A_P01732_OID21018	rs3020726	2	87016506	G	A	0.15488	0.344802	0.00822367	0	52363
Sun	CD93_Q9NPY3_OID20397	rs184054831	20	23085382	T	C	0.000539645	1.42363	0.136122	6.69898e-26	52363
Sun	CD99L2_Q8TCZ2_OID21122	rs7058184	X	150068138	C	T	0.142709	-0.198402	0.00725868	8.58353e-165	52363
Sun	CDA_P32320_OID30345	rs2072671	1	20915701	C	A	0.333587	-0.48871	0.0063034	0	52363
Sun	CDC27_P30260_OID21238	rs79702286	17	45296616	G	A	0.0999641	0.132243	0.0103606	1.30188e-37	52363
Sun	CDCP1_Q9H5V8_OID20940	rs2276862	3	45187785	G	C	0.168847	-0.295394	0.00714724	0	52363
Sun	CDH1_P12830_OID20353	rs2011779	16	68837496	G	A	0.377742	-0.047254	0.0060808	3.89292e-15	52363
Sun	CDH15_P55291_OID21005	rs11646135	16	89199108	A	G	0.145372	0.431503	0.00745862	0	52363
Sun	CDH17_Q12864_OID20134	rs11786049	8	95204067	C	G	0.469891	-0.266905	0.00543882	0	52363
Sun	CDH2_P19022_OID20170	rs12457737	18	25686372	C	T	0.300557	-0.0958369	0.00609007	4.24524e-56	52363
Sun	CDH23_Q9H251_OID31074	rs2166631	10	73472882	T	C	0.234269	-0.157211	0.00750317	8.88109e-98	52363
Sun	CDH3_P22223_OID21008	rs138190335	16	68719119	C	T	0.00361488	0.753248	0.0494511	1.08131e-52	52363
Sun	CDH5_P33151_OID20243	rs16956504	16	66432381	C	T	0.100403	0.295865	0.00911988	3.53877e-231	52363
Sun	CDH6_P55285_OID20157	rs4626350	5	30839451	A	G	0.537918	0.498155	0.00613721	0	52363
Sun	CDHR1_Q96JP9_OID20808	rs7916271	10	85954220	T	C	0.504842	0.227428	0.00631533	2.7091e-284	52363
Sun	CDHR2_Q9BYE9_OID21282	rs2913909	5	175945908	G	C	0.497941	-0.100331	0.00521648	9.7099e-83	52363
Sun	CDHR5_Q9HBB8_OID20193	rs12360820	11	620927	C	A	0.82236	0.639082	0.00798501	0	52363
Sun	CDKN1A_P38936_OID21319	rs1801270	6	36651971	A	C	0.0749227	-0.266448	0.0116746	1.35898e-115	52363
Sun	CDNF_Q49AH0_OID21318	rs61738953	10	14862082	G	C	0.0332903	-1.09402	0.0176823	0	52363
Sun	CDON_Q4KMG0_OID20754	rs138087778	11	125887165	A	G	0.000509185	-2.0767	0.132044	4.91316e-56	52363
Sun	CEACAM1_P13688_OID21528	rs10412463	19	43021011	C	G	0.0984897	-0.516813	0.0103666	0	52363
Sun	CEACAM16_Q2WEN9_OID31495	rs17715069	19	45209443	C	G	0.390337	-0.336285	0.00621724	0	52363
Sun	CEACAM19_Q7Z692_OID31443	rs62119321	19	45172785	C	T	0.0276276	0.602436	0.0184131	4.36103e-235	52363
Sun	CEACAM20_Q6UY09_OID31308	rs10414398	19	45021210	A	G	0.0883237	-0.270074	0.0109537	1.5882e-134	52363
Sun	CEACAM21_Q3KPI0_OID20548	rs714106	19	42083849	A	C	0.72923	-1.17179	0.00704693	0	52363
Sun	CEACAM5_P06731_OID21171	rs9621	19	42231159	A	G	0.0398487	0.97492	0.0155968	0	52363
Sun	CEACAM6_P40199_OID30362	rs12459454	19	42263143	G	A	0.287787	-0.12862	0.00657517	1.64716e-85	52363
Sun	CEACAM8_P31997_OID20102	rs12459454	19	42263143	G	A	0.288065	-0.130695	0.00643636	5.72134e-92	52363
Sun	CEBPB_P17676_OID20052	rs6063502	20	48955595	G	A	0.367148	-0.055927	0.00644794	2.09292e-18	52363
Sun	CELA2A_P08217_OID30411	rs188524036	1	15798603	G	T	0.0106594	-0.520086	0.0297615	1.10825e-68	52363
Sun	CELA3A_P09093_OID20298	rs34262568	1	22313371	A	G	0.225953	0.230764	0.00706745	3.79458e-234	52363
Sun	CELSR2_Q9HCU4_OID30593	rs12740374	1	109817590	T	G	0.221591	0.450722	0.0073725	0	52363
Sun	CEMIP2_Q9UHN6_OID30499	rs191912523	9	74346987	G	T	0.0838946	0.238308	0.0113906	1.70743e-97	52363
Sun	CENPF_P49454_OID31329	rs3790646	1	214818846	G	A	0.0547636	-0.131513	0.0131009	5.16314e-24	52363
Sun	CEP112_Q8N8E3_OID30115	rs12938334	17	63934200	C	A	0.439742	-0.230425	0.00646352	1.17481e-278	52363
Sun	CEP152_O94986_OID31249	rs77379665	15	49082509	T	C	0.0315123	0.13155	0.0180736	1.68686e-13	52363
Sun	CEP170_Q5SW79_OID30240	rs12741781	1	243428152	G	T	0.330313	0.0652587	0.00652897	7.99401e-24	52363
Sun	CEP20_Q96NB1_OID21209	rs7204850	16	15966822	C	T	0.0571682	-0.213702	0.0134277	2.49289e-57	52363
Sun	CEP43_O95684_OID20084	rs6904946	6	167433948	C	T	0.445505	0.073672	0.00619605	6.6579e-33	52363
Sun	CEP85_Q6P2H3_OID21241	rs7542844	1	26618467	A	G	0.92109	0.140246	0.0115727	4.20446e-34	52363
Sun	CERT_Q9Y5P4_OID20857	rs577344407	5	74700841	AAAC	A	0.0880178	0.0845525	0.011051	9.96201e-15	52363
Sun	CES1_P23141_OID20244	rs28547561	16	55860775	A	G	0.0543905	-1.13641	0.0133821	0	52363
Sun	CES2_O00748_OID21366	rs140461033	16	66971964	A	G	0.00332815	-1.02741	0.0521533	1.08219e-86	52363
Sun	CES3_Q6UWW8_OID21340	rs71647892	16	66997756	C	T	0.0117765	-0.892058	0.0280525	3.27903e-222	52363
Sun	CETN3_O15182_OID31525	rs4873	5	89703641	G	C	0.272417	-0.177234	0.00690788	1.77578e-145	52363
Sun	CFC1_P0CG37_OID21261	rs7580681	2	131157129	C	G	0.0109491	-0.259635	0.0377612	3.08413e-12	52363
Sun	CFD_P00746_OID30738	rs71335276	19	859368	T	G	0.225696	-0.1814	0.00741679	2.0674e-132	52363
Sun	CFH_P08603_OID30790	rs33915960	1	196676713	T	G	0.202563	0.42054	0.00769177	0	52363
Sun	CFHR2_P36980_OID30720	rs4085749	1	196920148	T	C	0.227347	-1.03409	0.00739803	0	52363
Sun	CFHR4_Q92496_OID30758	rs10922147	1	196877689	G	C	0.236715	-0.784669	0.00729817	0	52363
Sun	CFHR5_Q9BXR6_OID30716	rs72732234	1	196303889	C	T	0.0166127	-1.566	0.0245789	0	52363
Sun	CFI_P05156_OID30772	rs10033900	4	110659067	C	T	0.514309	0.199403	0.00595735	6.2089e-246	52363
Sun	CFP_P27918_OID30784	rs61737993	X	47486217	T	C	0.00156907	-1.29013	0.0628851	7.80011e-94	52363
Sun	CGA_P01215_OID21069	rs2031367	6	87807180	G	A	0.293596	0.0403068	0.00492528	1.37679e-16	52363
Sun	CGB3_CGB5_CGB8_P0DN86_OID30671	rs1056914	19	49519855	G	T	0.502536	-0.0553682	0.00571595	1.71868e-22	52363
Sun	CGREF1_Q99674_OID20152	rs2384572	2	27324751	T	G	0.616083	-0.547683	0.00620557	0	52363
Sun	CHAC2_Q8WUX2_OID21230	rs78694551	2	53978813	G	A	0.260535	-0.154781	0.00705896	7.19764e-107	52363
Sun	CHAD_O15335_OID30660	rs144030994	17	48542714	T	G	0.00529158	-1.62159	0.0409607	0	52363
Sun	CHCHD10_Q8WYQ3_OID31116	rs62240638	22	24063486	A	G	0.0713629	-0.128078	0.0110289	1.77103e-31	52363
Sun	CHCHD6_Q9BRQ6_OID31426	rs9874911	3	126407080	G	A	0.175277	-0.292988	0.00798099	2.46173e-295	52363
Sun	CHGA_P10645_OID30403	rs729940	14	93399101	T	C	0.149576	-0.242407	0.00836594	6.70522e-185	52363
Sun	CHGB_P05060_OID21038	rs236153	20	5903894	G	A	0.380882	-0.59736	0.00614814	0	52363
Sun	CHI3L1_P36222_OID20399	rs4950928	1	203155882	C	G	0.790648	0.670303	0.00725933	0	52363
Sun	CHIT1_Q13231_OID20312	rs2486950	1	203174670	C	G	0.204768	-1.07368	0.00729506	0	52363
Sun	CHL1_O00533_OID20366	rs931679	3	259525	A	T	0.0885274	0.534743	0.0108405	0	52363
Sun	CHMP1A_Q9HD42_OID20930	rs460879	16	89712889	T	C	0.425703	-0.0908033	0.00627512	9.3235e-48	52363
Sun	CHMP6_Q96FZ7_OID30327	rs9989475	17	78971176	G	A	0.181141	0.200769	0.00797111	2.77466e-140	52363
Sun	CHRDL1_Q9BU40_OID20771	rs5942957	X	109778405	A	C	0.394585	-0.293712	0.00461408	0	52363
Sun	CHRDL2_Q6WN34_OID20223	rs551789974	11	74432192	G	A	0.0401071	-0.655462	0.0152089	0	52363
Sun	CIAPIN1_Q6FI81_OID21501	rs477025	16	57508960	C	T	0.5207	0.0473783	0.00612979	5.41173e-15	52363
Sun	CILP_O75339_OID30399	rs2585035	15	65496475	G	T	0.627367	-0.28777	0.00610297	0	52363
Sun	CIT_O14578_OID30970	rs74653672	12	120245843	C	T	0.0167911	-0.209126	0.0238178	8.15631e-19	52363
Sun	CKAP4_Q07065_OID20617	rs1215741	12	106634872	T	A	0.264123	0.196107	0.00659229	9.22129e-195	52363
Sun	CKMT1A_CKMT1B_P12532_OID20721	rs2288768	15	43996898	C	G	0.107087	-0.270332	0.0100134	8.00859e-161	52363
Sun	CLC_Q05315_OID20126	rs143121234	19	40226530	G	C	0.00182263	-1.32199	0.0768092	1.09142e-66	52363
Sun	CLEC10A_Q8IUN9_OID20928	rs90951	17	6981397	G	A	0.351953	0.531697	0.00646017	0	52363
Sun	CLEC11A_Q9Y240_OID21112	rs141369989	19	51226507	A	G	0.0287637	0.785594	0.0184279	0	52363
Sun	CLEC12A_Q5QGZ9_OID30552	rs12230629	12	10117783	C	T	0.273425	0.485235	0.00707327	0	52363
Sun	CLEC14A_Q86T13_OID21090	rs10151239	14	38972370	A	C	0.400629	0.0775119	0.00588351	6.15757e-40	52363
Sun	CLEC1A_Q8NC01_OID20099	rs7961483	12	10230460	T	C	0.600238	-0.303074	0.00613701	0	52363
Sun	CLEC1B_Q9P126_OID21061	rs11379994	12	10151762	TC	T	0.735289	-0.16385	0.00696921	1.59055e-122	52363
Sun	CLEC3B_P05452_OID30756	rs13065490	3	45057108	T	A	0.253123	0.225631	0.00697483	7.09131e-230	52363
Sun	CLEC4A_Q9UMR7_OID20573	rs117213717	12	8278195	A	G	0.0128653	-1.97525	0.0265899	0	52363
Sun	CLEC4C_Q8WTT0_OID20547	rs11055602	12	7904111	G	T	0.403144	0.845825	0.00616926	0	52363
Sun	CLEC4D_Q8WXI8_OID20609	rs4242896	12	8688999	C	A	0.569056	0.497343	0.00593428	0	52363
Sun	CLEC4G_Q6UXB4_OID20590	rs117133715	19	7801560	T	C	0.0687366	0.37262	0.0117894	1.50968e-219	52363
Sun	CLEC4M_Q9H2X3_OID30405	rs4804774	19	7772173	C	G	0.245513	-0.372548	0.00604972	0	52363
Sun	CLEC5A_Q9NY25_OID20165	rs1726867	7	141660700	G	A	0.6935	-0.27901	0.00633665	0	52363
Sun	CLEC6A_Q6EIG7_OID21228	rs4420350	12	8606973	A	G	0.779728	0.611453	0.00737719	0	52363
Sun	CLEC7A_Q9BXN2_OID20636	rs16910526	12	10271087	C	A	0.0826498	-1.55637	0.0109509	0	52363
Sun	CLGN_O14967_OID30957	rs6852397	4	141348748	T	G	0.0934855	1.16858	0.0107489	0	52363
Sun	CLIC5_Q9NZA1_OID30890	rs2022423	6	46046859	G	A	0.358838	-0.123898	0.00654816	3.82644e-80	52363
Sun	CLIP2_Q9UDT6_OID20559	rs73131317	7	73702715	A	G	0.0651317	0.230783	0.01239	9.78644e-78	52363
Sun	CLMP_Q9H6B4_OID21419	rs2302605	11	123065683	T	C	0.543431	0.321728	0.00564137	0	52363
Sun	CLPS_P04118_OID21156	rs2766588	6	35753227	C	T	0.603149	0.522485	0.00645428	0	52363
Sun	CLSTN2_Q9H4D0_OID20664	rs41265459	3	140167490	A	T	0.00646656	2.30343	0.0378391	0	52363
Sun	CLSTN3_Q9BQT9_OID31092	rs2167285	12	7284301	T	C	0.567741	-0.46683	0.00610872	0	52363
Sun	CLU_P10909_OID30732	rs9331938	8	27457479	T	C	0.00130977	-2.14108	0.0869953	4.76362e-134	52363
Sun	CLUL1_Q15846_OID20198	rs12957470	18	591690	C	G	0.280453	0.61028	0.00668652	0	52363
Sun	CMC1_Q7Z7K0_OID30360	rs370517451	3	28283101	A	G	0.014378	-0.310605	0.0276437	1.3568e-29	52363
Sun	CNDP1_Q96KN2_OID20347	rs17817077	18	72209543	A	G	0.384158	0.281301	0.00624637	0	52363
Sun	CNP_P09543_OID30285	-	17	40102154	C	CA	0.72175	0.0908657	0.0068632	2.59283e-40	52363
Sun	CNPY4_Q8N129_OID21317	rs7457787	7	99777869	C	A	0.115366	-0.262996	0.00966385	2.19288e-163	52363
Sun	CNTN1_Q12860_OID20307	rs11177604	12	41045385	A	C	0.377846	0.20209	0.00577585	1.66584e-268	52363
Sun	CNTN2_Q02246_OID21426	rs2071533	1	205012198	G	T	0.869731	-1.18498	0.00894521	0	52363
Sun	CNTN3_Q9P232_OID21092	rs7427367	3	74595819	A	G	0.927047	-0.505516	0.0108181	0	52363
Sun	CNTN4_Q8IWV2_OID21117	rs163352	3	3098041	C	G	0.804178	-0.314865	0.00759936	0	52363
Sun	CNTN5_O94779_OID21006	rs7108717	11	99055652	A	C	0.925527	-0.787782	0.0109757	0	52363
Sun	CNTNAP2_Q9UHC6_OID20556	rs850460	7	145333369	G	A	0.718554	-0.543808	0.00663297	0	52363
Sun	CNTNAP4_Q9C0A0_OID30911	-	16	76429633	G	GT	0.456471	0.0568999	0.0063824	2.43631e-19	52363
Sun	COCH_O43405_OID30305	rs28400019	14	31343494	A	G	0.111367	0.506571	0.00992839	0	52363
Sun	COL15A1_P39059_OID30396	rs10819566	9	101763477	C	T	0.376562	0.178284	0.00618244	3.67086e-183	52363
Sun	COL18A1_P39060_OID20332	rs36182034	21	46903982	C	T	0.386841	-0.152795	0.00603401	9.07492e-142	52363
Sun	COL1A1_P02452_OID20335	rs147266928	17	48263206	C	T	0.00109643	1.36241	0.0963339	1.03765e-45	52363
Sun	COL24A1_Q17RW2_OID31464	rs148644471	1	86600011	G	T	0.0909847	-0.28048	0.010637	1.58152e-153	52363
Sun	COL28A1_Q2UY09_OID30969	rs7810134	7	7542265	A	G	0.246277	0.871103	0.00733394	0	52363
Sun	COL2A1_P02458_OID30286	rs10875723	12	48417537	G	A	0.399404	-0.733736	0.00629807	0	52363
Sun	COL3A1_P02461_OID30379	rs540608250	2	189857452	G	A	0.00257227	1.38693	0.0666078	1.35808e-96	52363
Sun	COL4A1_P02462_OID20208	rs3742207	13	110818598	G	T	0.337995	-0.183892	0.00629927	1.20414e-187	52363
Sun	COL5A1_P20908_OID30587	rs12002679	9	137533634	G	C	0.294166	0.221088	0.00692077	3.11156e-224	52363
Sun	COL6A3_P12111_OID20292	rs1050785	2	238232752	A	C	0.610132	0.090355	0.00617689	9.32112e-49	52363
Sun	COL9A1_P20849_OID20550	rs543674622	6	70987126	G	A	0.00284091	1.47426	0.0606656	9.46945e-131	52363
Sun	COLEC12_Q5KU26_OID20738	rs149622251	18	331717	T	C	0.00552199	-0.87143	0.0381225	5.98998e-116	52363
Sun	COMMD1_Q8N668_OID30222	rs55677935	2	62228013	T	C	0.0166329	-0.686011	0.0246793	2.35642e-170	52363
Sun	COMP_P49747_OID20405	rs12974746	19	18906548	G	A	0.0283567	-0.570247	0.0181601	9.77504e-217	52363
Sun	COMT_P21964_OID20086	rs4680	22	19951271	A	G	0.508173	-0.450944	0.00619299	0	52363
Sun	COQ7_Q99807_OID30217	rs11074359	16	19085298	T	C	0.629246	-0.130136	0.00633628	4.90322e-94	52363
Sun	CPA1_P15085_OID20280	rs13226219	7	130019491	C	T	0.126557	0.252326	0.0090073	5.56352e-173	52363
Sun	CPA2_P48052_OID21060	rs10257530	7	129913520	C	T	0.346079	-0.371035	0.00655357	0	52363
Sun	CPA4_Q9UI42_OID30606	rs34587586	7	129938598	T	G	0.394555	-0.535276	0.006353	0	52363
Sun	CPB1_P15086_OID20289	rs2331406	3	148565482	A	G	0.238233	0.12698	0.00699752	6.85122e-74	52363
Sun	CPB2_Q96IY4_OID30734	rs6561283	13	46640837	G	A	0.738991	0.661614	0.00692416	0	52363
Sun	CPE_P16870_OID21392	rs1550270	4	166261800	C	T	0.304581	0.243524	0.00671451	2.55572e-288	52363
Sun	CPM_P14384_OID21054	rs7978197	12	69326547	T	C	0.030965	-0.511236	0.0193805	1.19694e-153	52363
Sun	CPOX_P36551_OID30495	rs1729988	3	98318393	T	C	0.140251	-0.151462	0.00906166	5.13052e-63	52363
Sun	CPPED1_Q9BRF8_OID21053	rs61664415	16	12888077	CA	C	0.195573	0.813809	0.00787936	0	52363
Sun	CPQ_Q9Y646_OID30406	rs148684432	8	98041637	A	G	0.00840393	-1.88492	0.0316487	0	52363
Sun	CPTP_Q5TA50_OID30106	rs150789461	1	1284490	A	G	0.912817	-0.0806698	0.0116567	2.2508e-12	52363
Sun	CPVL_Q9H3G5_OID21435	rs34219043	7	29160604	T	C	0.191629	-0.841561	0.0075109	0	52363
Sun	CPXM1_Q96SM3_OID21479	rs215545	20	2782015	C	T	0.761164	0.36502	0.00711344	0	52363
Sun	CPXM2_Q8N436_OID30322	rs28741041	10	125650709	C	G	0.381214	-0.455618	0.00611374	0	52363
Sun	CR1_P17927_OID30697	rs679515	1	207750568	C	T	0.83068	-0.545222	0.00803023	0	52363
Sun	CR2_P20023_OID20393	rs61821108	1	207590852	A	G	0.108331	-0.281538	0.00949022	1.05077e-193	52363
Sun	CRACR2A_Q9BSW2_OID21249	rs6489498	12	3902269	G	A	0.352759	-0.134914	0.00641367	1.55627e-98	52363
Sun	CRADD_P78560_OID20923	rs56944668	12	94243853	T	C	0.15847	-0.0970322	0.00844221	7.09534e-31	52363
Sun	CREG1_O75629_OID21515	rs7513428	1	167515272	C	T	0.837914	-0.240816	0.0079907	7.93124e-200	52363
Sun	CRELD1_Q96HD1_OID30619	rs9878047	3	9985457	C	T	0.261956	0.816216	0.00702865	0	52363
Sun	CRELD2_Q6UXH1_OID20751	rs74510325	22	50315382	G	C	0.0324261	-0.82748	0.017009	0	52363
Sun	CRH_P06850_OID21257	rs59104426	8	67172949	A	T	0.0348704	-0.657053	0.0164535	0	52363
Sun	CRHBP_P24387_OID20747	rs1700657	5	76211261	T	C	0.638001	-0.569263	0.00624021	0	52363
Sun	CRIM1_Q9NZV1_OID20701	rs201258494	2	36583342	TGCG	T	0.197356	-0.139386	0.00742255	5.63812e-79	52363
Sun	CRIP2_P52943_OID20901	rs80324969	14	105917816	C	G	0.169995	0.185034	0.00818086	1.44403e-113	52363
Sun	CRISP2_P16562_OID21456	rs555247	6	49710105	A	G	0.462367	0.486541	0.00526679	0	52363
Sun	CRISP3_P54108_OID30715	rs1025347	6	49652977	A	G	0.493865	-0.555847	0.00592899	0	52363
Sun	CRNN_Q9UBG3_OID21427	rs10494275	1	152391567	A	G	0.0713142	-1.18996	0.0117122	0	52363
Sun	CRTAC1_Q9NQ79_OID20279	rs56007204	10	99625319	T	C	0.203517	-0.781652	0.00683691	0	52363
Sun	CRTAM_O95727_OID20914	rs2370794	11	122714782	G	A	0.338771	0.316242	0.00634766	0	52363
Sun	CRYBB1_P53674_OID30319	rs4822754	22	27012894	G	A	0.535288	-0.152485	0.00607804	3.37411e-139	52363
Sun	CRYBB2_P43320_OID31081	rs16986565	22	25625121	T	C	0.0112638	0.217476	0.0283409	8.36343e-15	52363
Sun	CRYGD_P07320_OID31144	rs34570682	2	208978937	A	G	0.298769	-0.711417	0.00672293	0	52363
Sun	CRYM_Q14894_OID30815	rs2733910	16	21285281	T	C	0.255128	-0.412489	0.00720371	0	52363
Sun	CRYZL1_O95825_OID30272	rs13050238	21	34997018	T	C	0.03007	-0.368532	0.017924	3.07966e-94	52363
Sun	CSF1_P09603_OID20719	rs2225767	1	110503078	C	T	0.507389	-0.177399	0.00608305	2.87156e-187	52363
Sun	CSF1R_P07333_OID30681	rs56048668	5	149460542	C	A	0.0058371	-1.50454	0.0384358	0	52363
Sun	CSF2_P04141_OID30072	rs25882	5	131411460	C	T	0.213396	0.243184	0.00759459	2.80979e-225	52363
Sun	CSF2RB_P32927_OID30553	rs2239749	22	37331305	G	A	0.453461	-1.11173	0.00628264	0	52363
Sun	CSF3_P09919_OID20491	rs9898547	17	38136026	T	G	0.456805	-0.0756909	0.00605601	3.80477e-36	52363
Sun	CSF3R_Q99062_OID30527	rs3917999	1	36933317	T	C	0.0122489	1.09206	0.0285048	0	52363
Sun	CSPG4_Q6UVK1_OID30397	rs77237106	15	75969335	T	C	0.166735	-0.135924	0.00772361	1.26453e-69	52363
Sun	CST1_P01037_OID30581	rs4549181	20	23728873	T	C	0.307582	-0.570915	0.00687166	0	52363
Sun	CST3_P01034_OID20400	rs911119	20	23612737	T	C	0.771	0.306717	0.00677028	0	52363
Sun	CST5_P28325_OID20995	rs1799841	20	23860178	G	A	0.445752	0.712956	0.0059942	0	52363
Sun	CST6_Q15828_OID20293	-	11	65770312	T	TAGAG	0.0268759	0.582727	0.0180612	1.11841e-228	52363
Sun	CST7_O76096_OID20704	rs2387362	20	24899906	T	C	0.770935	0.81885	0.0073381	0	52363
Sun	CSTB_P04080_OID20294	-	21	45196323	C	CGCGCGGGGCGGG	0.317182	-0.789794	0.00678164	0	52363
Sun	CTBS_Q01459_OID30710	rs79723172	1	85012695	A	G	0.0293897	1.35452	0.0174749	0	52363
Sun	CTF1_Q16619_OID20061	-	16	30987380	G	GT	0.63073	0.0505037	0.00648837	3.52093e-15	52363
Sun	CTHRC1_Q96CG8_OID30393	rs827592	8	104364637	G	C	0.537186	-0.157248	0.00551939	7.76767e-179	52363
Sun	CTRB1_P17538_OID21150	rs8051363	16	75255217	G	A	0.722356	0.557049	0.00691016	0	52363
Sun	CTRC_Q99895_OID20752	rs497078	1	15767036	T	C	0.0993818	-0.551695	0.00961396	0	52363
Sun	CTRL_P40313_OID31157	rs7187289	16	67967878	C	A	0.182225	0.0949865	0.00777104	1.16939e-34	52363
Sun	CTSB_P07858_OID20276	rs709821	8	11702594	C	G	0.255033	0.591046	0.00693027	0	52363
Sun	CTSC_P53634_OID20679	rs11019400	11	88070858	G	A	0.0931759	0.970997	0.0104114	0	52363
Sun	CTSD_P07339_OID20358	rs55861089	11	1783757	G	A	0.105178	-0.492405	0.00988826	0	52363
Sun	CTSE_P14091_OID30628	rs41302235	1	206328803	C	T	0.191046	-0.621616	0.00772635	0	52363
Sun	CTSF_Q9UBX1_OID21500	rs1044522	11	66335832	A	G	0.237637	0.214737	0.00684923	4.56979e-216	52363
Sun	CTSH_P09668_OID20113	rs60250730	15	79238144	G	C	0.17401	1.10233	0.00818998	0	52363
Sun	CTSL_P07711_OID20228	rs868561	9	90349202	C	G	0.512026	-0.145354	0.00590569	4.6373e-134	52363
Sun	CTSO_P43234_OID20660	rs2334114	4	156856193	A	C	0.201051	-0.219581	0.00751574	6.04607e-188	52363
Sun	CTSS_P25774_OID21056	rs771911677	1	150688366	A	AAT	0.471534	-0.435784	0.00684013	0	52363
Sun	CTSV_O60911_OID21405	rs117724680	9	99906465	C	T	0.0657726	0.388696	0.0114823	1.70987e-251	52363
Sun	CTSZ_Q9UBR2_OID20365	rs199825459	20	57572709	G	A	0.00822755	-1.965	0.0322234	0	52363
Sun	CWC15_Q9P013_OID31479	rs13377454	11	94724428	C	A	0.669939	-0.0625948	0.00650457	3.19061e-22	52363
Sun	CX3CL1_P78423_OID20976	rs781264602	16	57409062	A	AAAG	0.600578	-0.226101	0.00630073	2.62825e-282	52363
Sun	CXADR_P78310_OID20561	rs2739393	21	18934539	A	G	0.663348	-0.119593	0.00633215	7.34601e-80	52363
Sun	CXCL1_P09341_OID20762	rs3097411	4	74738454	G	C	0.257529	0.659098	0.00718976	0	52363
Sun	CXCL10_P02778_OID20697	rs11548618	4	76943947	A	G	0.00624622	1.66885	0.0371679	0	52363
Sun	CXCL11_O14625_OID21042	rs35170645	4	76964956	G	A	0.519046	-0.243725	0.00609772	0	52363
Sun	CXCL12_P48061_OID20464	rs11239028	10	44883165	T	C	0.333653	0.191253	0.00658675	1.15532e-185	52363
Sun	CXCL13_O43927_OID21024	rs4280762	4	78352799	T	C	0.0953695	-0.087721	0.0104881	3.03495e-17	52363
Sun	CXCL14_O95715_OID20458	rs6596251	5	134955821	G	A	0.365014	-0.0632316	0.00578152	3.84127e-28	52363
Sun	CXCL16_Q9H2A7_OID20282	rs60894000	17	4641369	C	G	0.526092	0.177986	0.00589213	9.46506e-201	52363
Sun	CXCL17_Q6UXB2_OID20622	rs56988688	19	42943615	GA	G	0.0877694	0.114555	0.00965249	8.68645e-33	52363
Sun	CXCL5_P42830_OID20207	rs352045	4	74864687	G	T	0.873894	-0.575446	0.00892066	0	52363
Sun	CXCL6_P80162_OID20613	rs16850073	4	74703999	T	C	0.363982	0.559026	0.00641571	0	52363
Sun	CXCL8_P10145_OID21430	rs1247635	4	74546503	C	G	0.0712847	-0.157199	0.0121382	1.16309e-38	52363
Sun	CXCL9_Q07325_OID20675	rs4241577	4	76930776	A	C	0.238289	-0.152284	0.00658588	1.36538e-118	52363
Sun	CYB5R2_Q6BCY4_OID31512	rs10839828	11	7658348	A	C	0.201002	-0.293416	0.00770025	0	52363
Sun	CYTL1_Q9NRR1_OID30374	rs11722554	4	5016883	A	G	0.0374317	-1.31708	0.0154869	0	52363
Sun	DAG1_Q14118_OID20774	rs6446277	3	49473077	A	G	0.305694	0.0635468	0.0066383	5.20486e-22	52363
Sun	DAPK2_Q9UIK4_OID30505	rs34772505	15	64276772	T	C	0.407245	0.384006	0.00637712	0	52363
Sun	DAPP1_Q9UN19_OID20524	-	4	100736763	G	GT	0.484342	-0.0991638	0.00618256	3.39697e-58	52363
Sun	DARS1_P14868_OID20903	rs149170955	2	136691500	A	G	0.00189075	-0.97428	0.0729684	5.75926e-41	52363
Sun	DBH_P09172_OID30703	rs1611115	9	136500515	C	T	0.792417	1.1618	0.00755309	0	52363
Sun	DBI_P07108_OID21143	rs11680074	2	120141823	A	G	0.199487	-0.319387	0.00769519	0	52363
Sun	DBN1_Q16643_OID30549	rs2544809	5	176885499	C	T	0.553889	-0.0508892	0.00616496	7.62141e-17	52363
Sun	DBNL_Q9UJU6_OID20681	rs7799945	7	44109802	G	A	0.321284	0.0679369	0.00649891	7.05454e-26	52363
Sun	DCBLD2_Q96PD2_OID21474	rs12487717	3	98605007	A	G	0.0122832	-1.07208	0.0268398	0	52363
Sun	DCC_P43146_OID30953	rs9807459	18	49481736	A	G	0.304078	0.244399	0.0067457	1.01367e-287	52363
Sun	DCN_P07585_OID20106	rs73198632	12	91534810	T	C	0.0681605	-0.104139	0.0115302	8.43993e-20	52363
Sun	DCTD_P32321_OID30657	rs747369	4	183951300	A	G	0.366546	0.0561669	0.00640824	9.35597e-19	52363
Sun	DCTPP1_Q9H773_OID20148	rs146094440	16	30435601	G	C	0.0128968	-0.498094	0.0289015	7.35471e-67	52363
Sun	DCXR_Q7Z4W1_OID21480	rs61746217	17	79993919	T	C	0.00425054	-0.732268	0.0451653	2.03855e-59	52363
Sun	DDAH1_O94760_OID21299	rs12138621	1	85783970	C	T	0.199303	-0.187019	0.00761151	1.30431e-133	52363
Sun	DDC_P20711_OID20215	rs2329370	7	50614646	T	A	0.979599	1.36037	0.0221337	0	52363
Sun	DDHD2_O94830_OID31043	rs571633916	8	38091445	CA	C	0.235745	-0.11102	0.00709342	1.632e-55	52363
Sun	DDI2_Q5TDH0_OID30602	rs41270291	1	15994251	A	G	0.00997756	-0.243039	0.0298232	1.82978e-16	52363
Sun	DDT_P30046_OID30372	rs1006771	22	24314006	T	G	0.647967	-0.198132	0.00622777	2.05431e-222	52363
Sun	DDX58_O95786_OID21226	rs7045087	9	32455262	C	T	0.303182	0.276143	0.0067694	0	52363
Sun	DECR1_Q16698_OID20579	rs189045259	8	91051553	A	G	0.00439371	-0.89061	0.0464845	4.04854e-82	52363
Sun	DEFA1_DEFA1B_P59665_OID20344	rs74744251	8	6876928	G	A	0.388336	-0.268624	0.00704651	0	52363
Sun	DEFB104A_DEFB104B_Q8WTQ1_OID30849	rs144072245	8	12477657	C	G	0.0117982	0.832066	0.0292169	1.06837e-178	52363
Sun	DEFB4A_DEFB4B_O15263_OID21373	rs73184376	8	8268336	A	G	0.183708	0.0831355	0.00763993	7.04476e-28	52363
Sun	DFFA_O00273_OID20620	rs183281838	1	10038213	T	G	0.00255986	-0.608198	0.0679907	1.85451e-19	52363
Sun	DGCR6_Q14129_OID30859	rs425576	22	18896189	C	T	0.609467	0.12433	0.00649571	5.82705e-82	52363
Sun	DHRS4L2_Q6PKH6_OID31072	rs146691898	14	24477942	G	A	0.0533611	-0.655164	0.0138611	0	52363
Sun	DIPK2B_Q9H7Y0_OID30582	rs4498684	X	45059412	A	C	0.204271	-0.138345	0.00603261	1.09247e-116	52363
Sun	DKK1_O94907_OID21066	rs7097068	10	54119880	G	T	0.428181	-0.0997571	0.0061861	8.37514e-59	52363
Sun	DKK3_Q9UBP4_OID20264	rs11022114	11	12038874	A	G	0.306663	0.363358	0.00635098	0	52363
Sun	DKK4_Q9UBT3_OID20934	rs3136791	8	42225183	G	T	0.0446257	-0.564358	0.0144946	0	52363
Sun	DKKL1_Q9UK85_OID21313	rs2303759	19	49869051	G	T	0.259103	-1.2396	0.00684289	0	52363
Sun	DLK1_P80370_OID20295	rs12881760	14	101176335	C	G	0.643097	0.482524	0.0063093	0	52363
Sun	DLL1_O00548_OID21525	rs9356631	6	170587470	G	A	0.423819	0.153192	0.00597555	2.99249e-145	52363
Sun	DMP1_Q13316_OID30213	rs187930321	4	88571240	C	A	0.00143704	0.697897	0.0807944	2.86184e-18	52363
Sun	DNAJA4_Q8WW22_OID31130	rs62007832	15	78557720	G	C	0.211104	0.143194	0.00725414	4.92536e-87	52363
Sun	DNAJB1_P25685_OID21363	rs7248009	19	14655502	A	G	0.601827	-0.0512882	0.00623098	9.27037e-17	52363
Sun	DNAJB14_Q8TBM8_OID31434	rs55797991	4	100771395	T	C	0.151847	-0.0590917	0.00864697	4.13459e-12	52363
Sun	DNAJB6_O75190_OID30613	rs12668458	7	157145474	C	T	0.451278	0.190019	0.00631583	3.67723e-199	52363
Sun	DNAJC21_Q5F1R6_OID31104	rs10941225	5	34961480	A	T	0.427045	-0.10388	0.00623891	1.50433e-62	52363
Sun	DNAJC6_O75061_OID30247	rs61779319	1	65765328	A	T	0.421422	0.0729292	0.00614069	7.85057e-33	52363
Sun	DNER_Q8NFT8_OID20712	rs62193248	2	230596917	T	A	0.330042	-0.275561	0.00629915	0	52363
Sun	DNM1_Q05193_OID31458	rs3003599	9	130979181	G	A	0.806492	0.31284	0.00775403	0	52363
Sun	DNMBP_Q6XZF7_OID20956	rs7069556	10	101770377	G	C	0.0839434	-0.212675	0.0110417	5.69949e-83	52363
Sun	DNPEP_Q9ULA0_OID31118	rs115897075	2	220250232	C	G	0.0167768	0.313273	0.0236681	2.71531e-40	52363
Sun	DNPH1_O43598_OID20744	rs45448395	6	43189645	A	G	0.100719	-0.455126	0.00991945	0	52363
Sun	DOC2B_Q14184_OID30927	rs8069133	17	32311	G	A	0.67516	0.0635579	0.0067742	3.22599e-21	52363
Sun	DOK2_O60496_OID20138	rs4357289	8	21777476	A	G	0.429318	0.0543412	0.00618443	7.69567e-19	52363
Sun	DPEP1_P16444_OID20897	rs423135	16	89740873	A	G	0.504082	0.776879	0.00617333	0	52363
Sun	DPEP2_Q9H4A9_OID21305	rs144339907	16	68025998	C	A	0.00340692	-2.1286	0.0514769	0	52363
Sun	DPP10_Q8N608_OID20527	rs17355498	2	115937924	T	G	0.478021	-0.260536	0.00604712	0	52363
Sun	DPP4_P27487_OID20406	rs13015258	2	162930725	G	T	0.621763	-0.21656	0.00610565	7.44596e-276	52363
Sun	DPP6_P42658_OID21354	rs3734960	7	154684153	C	T	0.270417	0.263434	0.00657628	0	52363
Sun	DPP7_Q9UHL4_OID20142	-	9	140008750	C	G	0.753438	0.510299	0.00708073	0	52363
Sun	DPT_Q07507_OID20278	rs1018454	1	168697761	C	A	0.573057	0.322668	0.00564671	0	52363
Sun	DPY30_Q9C005_OID21410	rs72794684	2	31986545	G	A	0.0452797	0.131409	0.0146545	1.52152e-19	52363
Sun	DRAXIN_Q8NBI3_OID20917	rs55706902	1	11724708	C	T	0.18039	-0.347906	0.00779295	0	52363
Sun	DSC2_Q02487_OID21079	rs71175758	18	28681468	CG	C	0.882175	-0.329491	0.00922424	9.6287e-280	52363
Sun	DSCAM_O60469_OID30993	rs78111814	21	42060498	C	T	0.0401976	0.891717	0.016122	0	52363
Sun	DSG2_Q14126_OID21113	rs1841396	18	29084421	A	T	0.405967	-0.213248	0.0060124	7.64804e-276	52363
Sun	DSG3_P32926_OID21460	rs10084010	18	29027745	T	C	0.175604	-0.310258	0.00749058	0	52363
Sun	DSG4_Q86SJ6_OID21325	rs12960081	18	28993183	G	A	0.474827	0.0505972	0.00585002	2.59617e-18	52363
Sun	DTD1_Q8TEA8_OID30580	rs6136442	20	18607626	T	A	0.369273	-0.155608	0.00637165	5.00167e-132	52363
Sun	DTX3_Q8N9I9_OID21349	-	12	58047831	A	AT	0.212272	-0.106363	0.00684648	9.98665e-55	52363
Sun	DTYMK_P23919_OID30308	rs28630677	2	242625961	T	C	0.0456688	-0.127843	0.0145517	7.7881e-19	52363
Sun	DUSP13_Q6B8I1_OID31394	rs6480771	10	76861680	C	T	0.427474	-0.261961	0.00622844	0	52363
Sun	DUSP29_Q68J44_OID30935	rs11001272	10	76823164	G	A	0.354379	-0.132765	0.00657617	6.1402e-91	52363
Sun	DYNLT1_P63172_OID30925	rs552769150	6	159048139	TCA	T	0.580727	0.0800974	0.00539294	3.36262e-50	52363
Sun	EBAG9_O00559_OID20918	rs2022934	8	110567774	A	G	0.400127	-0.0654035	0.00631921	2.09355e-25	52363
Sun	EBI3_IL27_Q14213_Q8NEV9_OID21389	rs181203	16	28512371	C	A	0.320745	-0.0699385	0.00602762	1.98931e-31	52363
Sun	EBI3_IL27_Q14213_Q8NEV9_OID21389	rs8109160	19	4247476	T	C	0.310288	-0.400991	0.00631911	0	52363
Sun	ECE1_P42892_OID20891	rs148461660	1	21564860	T	C	0.00641354	-0.982666	0.0390136	2.72617e-140	52363
Sun	ECHDC3_Q96DC8_OID30293	rs72783935	10	11809368	T	C	0.0887173	-0.94832	0.0106757	0	52363
Sun	ECHS1_P30084_OID30239	rs1049951	10	135184126	A	G	0.930615	-0.446614	0.0127158	1.5147e-270	52363
Sun	ECI2_O75521_OID30142	rs9328220	6	4120181	C	A	0.321794	-0.283305	0.00673272	0	52363
Sun	ECM1_Q16610_OID30736	rs3737240	1	150483355	T	C	0.383979	-0.66665	0.00643134	0	52363
Sun	EDA2R_Q9HAV5_OID21451	rs73221564	X	65954295	T	C	0.0092552	-1.27496	0.0211992	0	52363
Sun	EDAR_Q9UNE0_OID20525	rs148085735	2	109608575	G	C	0.0128129	1.68857	0.0266788	0	52363
Sun	EDDM3B_P56851_OID31365	rs3827905	14	21238318	A	G	0.657883	-0.163053	0.00427728	0	52363
Sun	EDIL3_O43854_OID20081	rs66802107	5	83321081	A	G	0.238829	-0.0898858	0.00712092	7.90702e-37	52363
Sun	EDN1_P05305_OID30224	rs5370	6	12296255	T	G	0.223027	0.261816	0.00725055	7.95494e-286	52363
Sun	EFCAB14_O75071_OID31460	rs562442365	1	47184700	A	G	0.00801592	-0.515765	0.0353777	1.9155e-48	52363
Sun	EFCAB2_Q5VUJ9_OID31313	rs61844237	1	245133662	C	G	0.459402	-0.385618	0.00629969	0	52363
Sun	EFEMP1_Q12805_OID20414	rs3791679	2	56096892	G	A	0.22629	0.205498	0.00666375	4.03299e-209	52363
Sun	EFHD1_Q9BUP0_OID31044	rs146096867	2	233520579	T	C	0.0882008	0.310273	0.0103879	2.51027e-196	52363
Sun	EFNA1_P20827_OID21125	rs4390169	1	155106054	G	A	0.509954	0.308195	0.00605336	0	52363
Sun	EFNA4_P52798_OID20935	rs148289726	1	155039270	T	C	0.00241179	-1.25827	0.0638554	9.7691e-87	52363
Sun	EGF_P01133_OID20698	-	4	110858515	C	CTT	0.404872	0.127786	0.00639403	3.70412e-89	52363
Sun	EGFL7_Q9UHF1_OID21252	rs74557797	9	139550503	T	G	0.0889906	-0.27829	0.0112029	1.62196e-136	52363
Sun	EGFLAM_Q63HQ2_OID31496	rs113400125	5	38406251	T	C	0.0249449	1.4738	0.0195841	0	52363
Sun	EGFR_P00533_OID20319	rs10081281	7	55236796	T	C	0.463715	0.161767	0.00595956	1.48552e-162	52363
Sun	EGLN1_Q9GZT9_OID20572	rs12097901	1	231557255	G	C	0.0687775	0.266088	0.01228	2.03821e-104	52363
Sun	EHBP1_Q8NDI1_OID30302	rs56044100	2	62735706	G	A	0.885522	-0.266289	0.0094544	7.71473e-175	52363
Sun	EHD3_Q9NZN3_OID30229	rs655029	2	31477838	A	G	0.721269	-0.189629	0.0070295	1.40696e-160	52363
Sun	EIF2AK2_P19525_OID31442	rs11894449	2	37380668	T	C	0.469368	0.148262	0.00608513	2.02803e-131	52363
Sun	EIF2AK3_Q9NZJ5_OID30060	rs4972221	2	88870632	T	A	0.663217	0.119599	0.00654813	7.91791e-75	52363
Sun	EIF4G3_O43432_OID31022	rs748509759	1	21289953	T	TTTAG	0.539459	0.075854	0.00609452	7.32737e-36	52363
Sun	EIF5_P55010_OID30156	rs138711694	14	103812439	C	T	0.0164475	-0.251129	0.025903	1.58354e-22	52363
Sun	ELAC1_Q9H777_OID31029	rs142132015	18	48510696	C	T	0.0044709	-0.82517	0.0455953	1.66132e-73	52363
Sun	ELN_P15502_OID30301	rs17855988	7	73474825	C	G	0.0960016	0.135582	0.00772545	2.97161e-69	52363
Sun	ELOA_Q14241_OID21337	rs2473378	1	24050735	A	G	0.605092	0.0804661	0.00610844	6.28065e-40	52363
Sun	ENAH_Q8N8S7_OID20497	-	1	225665434	G	GA	0.74869	0.120783	0.00721088	2.8263e-63	52363
Sun	ENDOU_P21128_OID31498	rs2240079	12	48129344	G	A	0.301911	0.323625	0.00599095	0	52363
Sun	ENG_P17813_OID20287	rs11794565	9	130601277	T	C	0.454	0.251007	0.00628625	0	52363
Sun	ENO1_P06733_OID21037	rs11544513	1	8926474	T	G	0.00322872	-1.31457	0.0540333	4.85017e-131	52363
Sun	ENO2_P09104_OID21046	rs11446182	12	7022359	AG	A	0.286543	0.150051	0.00674409	5.73368e-110	52363
Sun	ENO3_P13929_OID30209	rs2243090	17	4835217	C	T	0.6572	-0.0940479	0.00610336	7.09783e-54	52363
Sun	ENOX2_Q16206_OID30152	rs201499642	X	129705436	G	T	0.688876	-0.0411447	0.00594488	2.24184e-12	52363
Sun	ENPEP_Q07075_OID30135	rs33966350	4	111431444	A	G	0.0122316	-0.320886	0.0286109	1.71093e-29	52363
Sun	ENPP2_Q13822_OID20288	rs13267597	8	120654225	G	T	0.316355	-0.250327	0.00539709	0	52363
Sun	ENPP5_Q9UJA9_OID20736	rs34109856	6	46135884	G	C	0.0505944	-1.65859	0.0130049	0	52363
Sun	ENPP6_Q6UWR7_OID30273	rs78293932	4	185139101	T	C	0.0240859	0.966602	0.0191908	0	52363
Sun	ENPP7_Q6UWV6_OID20689	rs11868696	17	77706406	G	A	0.379602	0.94409	0.00647837	0	52363
Sun	ENSA_O43768_OID31355	rs190018150	1	150607787	A	G	0.0391282	0.119717	0.0160965	5.13216e-14	52363
Sun	ENTPD2_Q9Y5L3_OID21260	-	9	139943537	T	G	0.0203481	-1.51183	0.022852	0	52363
Sun	ENTPD5_O75356_OID20104	rs8017421	14	74471016	G	A	0.0602145	-0.962236	0.0130847	0	52363
Sun	ENTPD6_O75354_OID20100	rs6050446	20	25195509	G	A	0.96954	1.90821	0.018073	0	52363
Sun	ENTR1_Q96C92_OID30231	rs11145904	9	139297946	C	A	0.171539	-0.29314	0.00811233	3.18675e-286	52363
Sun	EPGN_Q6UW88_OID31373	rs62312545	4	75160894	G	A	0.212088	-0.0540588	0.00760383	5.8267e-13	52363
Sun	EPHA1_P21709_OID20677	rs75045569	7	143109208	G	T	0.176199	0.243096	0.00747755	3.83652e-232	52363
Sun	EPHA2_P29317_OID21342	rs924204	1	16513926	G	A	0.575187	-0.123112	0.00602213	3.44836e-93	52363
Sun	EPHA4_P54764_OID30622	rs10932916	2	222389971	A	G	0.517937	0.135281	0.00583433	3.0747e-119	52363
Sun	EPHB4_P54760_OID20242	rs314364	7	100416332	A	T	0.50469	0.150654	0.00591889	3.26295e-143	52363
Sun	EPHB6_O15197_OID20982	rs7789303	7	142552547	G	A	0.282302	-0.306329	0.00699918	0	52363
Sun	EPHX2_P34913_OID20119	rs71553864	8	27394334	AGTC	A	0.0551642	0.231572	0.0137497	6.00868e-64	52363
Sun	EPO_P01588_OID20522	rs11976235	7	100320381	T	C	0.005731	0.510801	0.040351	4.99174e-37	52363
Sun	EPPK1_P58107_OID30250	rs59265584	8	144950715	C	T	0.133246	-0.528646	0.0090394	0	52363
Sun	EPS8L2_Q9H6S3_OID21397	rs11246276	11	706284	T	G	0.162607	-0.394004	0.0081037	0	52363
Sun	ERBB2_P04626_OID21520	rs4252624	17	37867647	T	G	0.0167183	0.595659	0.0226372	6.75778e-153	52363
Sun	ERBB3_P21860_OID20705	rs75526830	12	56489394	G	A	0.00464464	2.43448	0.0434948	0	52363
Sun	ERBB4_Q15303_OID21510	rs6735267	2	213403863	T	C	0.268893	0.206384	0.0067555	2.78317e-205	52363
Sun	ERC2_O15083_OID30880	rs370683995	3	56345259	T	TTCTCTCTCTCTCTCTCTCTCTCTC	0.442057	0.059038	0.00635319	7.52437e-21	52363
Sun	EREG_O14944_OID20905	rs78803121	4	75248505	T	G	0.0555764	-0.193589	0.0134629	3.48265e-47	52363
Sun	ERI1_Q8IV48_OID31317	rs7814328	8	8876229	C	T	0.46309	-0.0702393	0.00620931	5.72688e-30	52363
Sun	ERMAP_Q96PL5_OID30539	rs11210731	1	43311165	G	A	0.183636	0.115504	0.00732215	2.32662e-56	52363
Sun	ERN1_O75460_OID31391	rs8178824	17	64224775	T	C	0.0297317	0.538407	0.0178099	4.66912e-201	52363
Sun	ERP44_Q9BS26_OID21338	rs192599012	9	102770924	T	A	0.00357408	-0.515555	0.0492632	6.23293e-26	52363
Sun	ESAM_Q96AP7_OID20270	rs61753651	11	124626569	A	G	0.00359239	-1.83917	0.0488847	0	52363
Sun	ESM1_Q9NQ30_OID20758	rs4242051	5	54198775	C	T	0.747052	0.190846	0.0069174	7.48407e-168	52363
Sun	ESYT2_A0FGR8_OID31134	rs2709865	7	158539572	C	T	0.934818	-0.269874	0.0124938	8.85838e-104	52363
Sun	EVI5_O60447_OID30519	rs11808092	1	93073228	A	C	0.246179	-0.145603	0.00714088	1.02439e-92	52363
Sun	EXTL1_Q92935_OID30114	rs2736831	1	26357656	A	C	0.680118	-0.402216	0.00678693	0	52363
Sun	EZR_P15311_OID21017	rs3734470	6	159187347	T	A	0.684772	0.101156	0.00661403	4.18197e-53	52363
Sun	F10_P00742_OID30684	rs547138	13	113792170	A	T	0.602934	0.169727	0.00629065	1.24037e-160	52363
Sun	F11_P03951_OID30773	rs3756011	4	187206249	A	C	0.390089	0.385293	0.0057661	0	52363
Sun	F11R_Q9Y624_OID21151	rs143551603	1	161005266	TA	T	0.238995	0.0669946	0.00742652	9.31943e-20	52363
Sun	F12_P00748_OID30739	rs1801020	5	176836532	G	A	0.732152	1.16733	0.00698509	0	52363
Sun	F13B_P05160_OID30781	rs12134960	1	197009508	C	G	0.16175	-0.544731	0.00815187	0	52363
Sun	F2_P00734_OID30723	rs1799963	11	46761055	A	G	0.0107999	0.732663	0.0305709	3.14491e-127	52363
Sun	F2R_P25116_OID20691	rs250736	5	76034355	A	G	0.171287	-0.139907	0.00818264	7.67569e-66	52363
Sun	F3_P13726_OID21440	-	1	94996170	T	TCTAGTCAA	0.00257988	1.83598	0.0584526	7.45239e-217	52363
Sun	F7_P08709_OID20372	rs561241	13	113760034	C	T	0.116255	-0.758729	0.00941416	0	52363
Sun	F9_P00740_OID20349	rs6048	X	138633280	G	A	0.292777	0.340294	0.00549114	0	52363
Sun	FABP1_P07148_OID20778	rs2241883	2	88424066	C	T	0.301973	-0.228234	0.00648937	2.83113e-271	52363
Sun	FABP2_P12104_OID20200	rs17009129	4	120280617	T	C	0.328131	-0.209925	0.00649388	1.4799e-229	52363
Sun	FABP3_P05413_OID30351	rs12401792	1	31847419	T	G	0.242664	-0.0914883	0.00642628	2.71575e-46	52363
Sun	FABP4_P15090_OID20245	rs72684474	8	82399883	T	A	0.158309	-0.114888	0.00766785	4.73627e-51	52363
Sun	FABP5_Q01469_OID21043	rs118019635	8	82193282	A	C	0.0687763	-0.208963	0.0120488	1.11293e-67	52363
Sun	FABP6_P51161_OID20076	rs1130435	5	159659273	T	C	0.407056	-0.136077	0.00642107	5.62786e-100	52363
Sun	FABP9_Q0Z7S8_OID20501	rs28497692	8	82412691	T	G	0.0387853	-0.20784	0.0149947	5.46495e-44	52363
Sun	FADD_Q13158_OID20151	rs3740720	11	70053547	T	C	0.394384	0.0800052	0.00630403	3.3116e-37	52363
Sun	FAM13A_O94988_OID31463	rs35916067	4	89935658	C	T	0.165118	-0.17267	0.00820646	1.39e-98	52363
Sun	FAM171B_Q6P995_OID31338	rs12617531	2	187553315	A	T	0.271242	-0.375327	0.00696504	0	52363
Sun	FAM172A_Q8WUF8_OID30248	rs10440717	5	93424852	A	C	0.129836	0.183481	0.00915222	1.05688e-89	52363
Sun	FAM20A_Q96MK3_OID30348	rs2907374	17	66520427	T	C	0.66447	-0.231143	0.00626552	3.18914e-298	52363
Sun	FAM3B_P58499_OID21372	rs57529409	21	42718262	T	C	0.0596754	-1.08702	0.0130145	0	52363
Sun	FAM3C_Q92520_OID20233	rs13242463	7	121080282	G	A	0.720882	-0.104598	0.00664893	4.59636e-56	52363
Sun	FAM3D_Q96BQ1_OID31514	rs12493101	3	58649922	C	T	0.892309	0.488624	0.00850325	0	52363
Sun	FAP_Q12884_OID20330	rs77577375	2	163055068	G	T	0.0109555	1.03637	0.0288419	4.69943e-283	52363
Sun	FARSA_Q9Y285_OID30887	rs35087277	19	13035722	C	T	0.0342484	-0.123596	0.0170004	1.79502e-13	52363
Sun	FAS_P25445_OID20316	rs7911226	10	90768965	G	A	0.30635	-0.260142	0.00607604	0	52363
Sun	FASLG_P48023_OID20665	rs859670	1	172673322	A	C	0.154977	-0.103007	0.00754967	1.09739e-42	52363
Sun	FBLN2_P98095_OID30378	rs28587534	3	13612286	G	A	0.0176367	-1.35046	0.0253273	0	52363
Sun	FBN2_P35556_OID30974	rs78821460	5	127874149	C	G	0.0807069	0.52264	0.0115936	0	52363
Sun	FBP1_P09467_OID20227	rs117815264	9	97360610	T	C	0.0708219	-0.571574	0.0118537	0	52363
Sun	FCAMR_Q8WWV6_OID30332	rs11119933	1	207140440	T	C	0.183481	0.431274	0.00764708	0	52363
Sun	FCAR_P24071_OID20564	rs12608573	19	55391374	G	C	0.215963	0.843766	0.0074558	0	52363
Sun	FCER1A_P12319_OID30992	rs7549785	1	159277868	A	G	0.159243	0.158759	0.00848313	1.87962e-78	52363
Sun	FCER2_P06734_OID21133	rs11260012	19	7759569	C	T	0.494107	-0.288569	0.0060417	0	52363
Sun	FCGR2A_P12318_OID20391	rs11810143	1	161480649	G	A	0.114484	-1.45267	0.00959431	0	52363
Sun	FCGR2B_P31994_OID21215	rs1801274	1	161479745	G	A	0.529337	-0.438917	0.00626692	0	52363
Sun	FCGR3B_O75015_OID20387	rs200688856	1	161599779	C	G	0.346679	-0.855514	0.00624433	0	52363
Sun	FCN1_O00602_OID30690	rs11103604	9	137857446	T	G	0.261207	0.437541	0.006787	0	52363
Sun	FCN2_Q15485_OID20382	rs7041446	9	137776054	A	G	0.464021	-0.614653	0.00603484	0	52363
Sun	FCRL1_Q96LA6_OID20172	rs4971154	1	157771880	T	C	0.492187	-0.342285	0.00600106	0	52363
Sun	FCRL2_Q96LA5_OID20639	rs12568320	1	157744004	G	A	0.167184	0.758797	0.00803634	0	52363
Sun	FCRL3_Q96P31_OID20443	rs7522061	1	157668390	C	T	0.482299	0.956851	0.00626124	0	52363
Sun	FCRL5_Q96RD9_OID21111	-	1	157513770	G	GA	0.215298	-0.482434	0.00700386	0	52363
Sun	FCRL6_Q6DN72_OID20529	rs6672434	1	159782684	G	A	0.195171	-0.865384	0.00763494	0	52363
Sun	FCRLB_Q6BAA4_OID21193	rs61801180	1	161688764	C	G	0.0570787	1.36803	0.0131948	0	52363
Sun	FDX1_P10109_OID30078	rs2724424	11	110261370	A	G	0.34827	0.0501624	0.00667389	2.81921e-14	52363
Sun	FES_P07332_OID21207	rs2071382	15	91428197	C	T	0.530438	0.130076	0.0062585	3.02717e-96	52363
Sun	FETUB_Q9UGM5_OID20404	rs114780909	3	186360255	A	T	0.00892443	-2.09748	0.0326179	0	52363
Sun	FGA_P02671_OID30788	rs140473879	4	155479065	T	C	0.00349483	-1.24747	0.0517799	1.52412e-128	52363
Sun	FGF16_O43320_OID30535	-	X	76889720	T	TAAAA	0.276187	-0.0541291	0.00603062	1.40764e-19	52363
Sun	FGF2_P09038_OID20503	rs2922979	4	123748616	G	C	0.324763	-0.713267	0.00660772	0	52363
Sun	FGF21_Q9NSA1_OID21402	rs838131	19	49260677	C	A	0.466968	-0.124514	0.00623581	5.27258e-89	52363
Sun	FGF23_Q9GZV9_OID21411	rs6489536	12	4491909	C	G	0.336085	0.0991727	0.00635334	3.13448e-55	52363
Sun	FGF5_P12034_OID20490	rs12509595	4	81182554	C	T	0.285122	0.664161	0.00643266	0	52363
Sun	FGFBP1_Q14512_OID21507	rs9968276	4	15949551	A	G	0.199521	-0.123251	0.00735818	2.82173e-63	52363
Sun	FGFBP2_Q9BYJ0_OID30395	rs35700679	4	15960246	G	A	0.149403	0.705411	0.00786399	0	52363
Sun	FGFBP3_Q8TAT2_OID31108	rs555601744	10	93665468	CA	C	0.313345	-0.387989	0.0063956	0	52363
Sun	FGFR2_P21802_OID21478	rs2981430	10	123311698	A	G	0.582482	-0.107184	0.00580823	2.42955e-76	52363
Sun	FGFR4_P22455_OID30646	rs351855	5	176520243	A	G	0.293231	0.995087	0.00642032	0	52363
Sun	FGL1_Q08830_OID30702	rs2073562	8	17742929	G	A	0.668262	0.653381	0.00623287	0	52363
Sun	FGR_P09769_OID20828	rs3737803	1	27960792	A	G	0.0774679	-0.178699	0.011385	8.05376e-56	52363
Sun	FHIT_P49789_OID20872	rs13070475	3	59969336	A	G	0.637343	0.0969185	0.00649071	1.02211e-50	52363
Sun	FIS1_Q9Y3D6_OID20722	rs74662330	7	100865866	T	C	0.0563026	-0.352706	0.0132572	2.98156e-156	52363
Sun	FKBP14_Q9NWM8_OID31065	rs181397928	7	30136191	C	G	0.000770147	-0.969647	0.117544	7.9712e-17	52363
Sun	FKBP1B_P68106_OID20618	rs116520786	2	24272645	T	C	0.196661	-0.247641	0.0077278	1.26926e-225	52363
Sun	FKBP4_Q02790_OID20960	rs34915583	12	2894419	C	T	0.0435476	-0.135033	0.0151791	2.89525e-19	52363
Sun	FKBP5_Q13451_OID20937	rs4236047	6	35691640	T	C	0.716873	-0.211254	0.00685051	4.09417e-209	52363
Sun	FKBP7_Q9Y680_OID20846	-	2	179343146	C	CTTTT	0.00325589	-0.730729	0.0550062	1.42407e-40	52363
Sun	FLRT2_O43155_OID20946	rs17646457	14	86089315	A	G	0.146566	-0.695581	0.00851319	0	52363
Sun	FLT1_P17948_OID21301	rs552252905	13	28986016	G	C	0.00111639	-1.09614	0.0949836	4.13144e-31	52363
Sun	FLT3_P36888_OID21272	rs9554228	13	28637838	G	A	0.616767	-0.0899036	0.00642746	9.30161e-45	52363
Sun	FLT4_P35916_OID21491	rs34221241	5	180057293	C	T	0.102199	-0.451425	0.00865725	0	52363
Sun	FN1_P02751_OID30787	rs1250259	2	216300482	A	T	0.739614	0.452594	0.00696285	0	52363
Sun	FNDC1_Q4ZHG4_OID31127	rs73588939	6	159948120	G	A	0.282535	-0.411811	0.00681668	0	52363
Sun	FNTA_P49354_OID31381	rs11990515	8	42942722	A	G	0.0935644	-0.0844093	0.0105703	6.99678e-16	52363
Sun	FOLH1_Q04609_OID30430	rs61886532	11	49235327	G	A	0.0492774	0.193847	0.0143902	1.16223e-41	52363
Sun	FOLR1_P15328_OID21529	rs115974400	11	71878862	C	T	0.0673258	-0.186439	0.011619	3.04623e-58	52363
Sun	FOLR2_P14207_OID21062	rs146893981	11	71917353	T	C	0.0306379	0.321151	0.016828	1.7043e-81	52363
Sun	FOLR3_P41439_OID21485	rs139130389	11	71850156	CTA	C	0.077981	1.67033	0.011369	0	52363
Sun	FOXJ3_Q9UPW0_OID30445	rs1139978	1	42657196	G	T	0.133481	-0.0960176	0.00914001	4.08762e-26	52363
Sun	FOXO1_Q12778_OID20515	rs76983463	13	41195654	C	T	0.0410988	0.279846	0.015358	1.74193e-74	52363
Sun	FRZB_Q92765_OID20968	rs13009	2	183699364	T	C	0.0870081	-0.782673	0.0105689	0	52363
Sun	FSHB_P01225_OID30233	rs11031006	11	30226528	A	G	0.138448	-0.147324	0.00598445	4.07261e-134	52363
Sun	FST_P19883_OID20770	rs31226	5	53327571	C	T	0.600226	-0.128196	0.00619735	2.33389e-95	52363
Sun	FSTL1_Q12841_OID30254	rs1147707	3	120169248	T	C	0.380649	-0.146904	0.0064408	1.89452e-115	52363
Sun	FSTL3_O95633_OID20782	rs929263	19	663373	T	C	0.83926	0.0988859	0.00794047	6.70007e-36	52363
Sun	FTCD_O95954_OID31137	rs550999731	21	47555017	G	C	0.00343041	-0.844495	0.0595654	6.30339e-46	52363
Sun	FUCA1_P04066_OID20261	rs13551	1	24180962	C	T	0.327275	-0.379826	0.00377721	0	52363
Sun	FUOM_A2VDF0_OID30626	rs55998424	10	135173022	C	T	0.0398764	0.507389	0.0157243	9.89147e-229	52363
Sun	FURIN_P09958_OID21514	rs764429222	15	91428521	C	CT	0.323647	0.197679	0.00640328	1.44055e-209	52363
Sun	FUT1_P19526_OID31295	rs2071699	19	49254504	A	G	0.0188233	-0.163048	0.0230001	6.75361e-13	52363
Sun	FUT3_FUT5_P21217_Q11128_OID21013	rs17855739	19	5831840	T	C	0.0511506	-1.11528	0.013289	0	52363
Sun	FUT8_Q9BYC5_OID20992	rs2127870	14	65796846	C	G	0.784847	-0.905298	0.00758216	0	52363
Sun	FXN_Q16595_OID21442	rs3750549	9	71831026	A	C	0.386591	0.0769487	0.00629623	1.19478e-34	52363
Sun	FXYD5_Q96DB9_OID20463	rs756845	19	35663250	G	A	0.778049	-0.386177	0.00761005	0	52363
Sun	GAGE2A_Q6NT46_OID31199	rs782018143	X	49394003	A	G	0.00623142	0.348367	0.0349717	1.1244e-23	52363
Sun	GAL_P22466_OID20727	rs2012605	11	68440107	T	C	0.0904804	0.14807	0.0101088	6.97448e-49	52363
Sun	GALNT10_Q86SR1_OID21371	rs890793	5	153573938	T	C	0.380409	0.374248	0.00620058	0	52363
Sun	GALNT2_Q10471_OID21423	rs4846914	1	230295691	A	G	0.585729	0.287041	0.00605377	0	52363
Sun	GALNT3_Q14435_OID20471	rs2116546	2	166723533	C	T	0.291642	-0.386754	0.00677613	0	52363
Sun	GALNT5_Q7Z7M9_OID30295	rs6759356	2	158140806	C	G	0.0325958	-0.807068	0.0186846	0	52363
Sun	GALNT7_Q86SF2_OID21377	rs144873913	4	174235304	A	C	0.00220564	-0.766881	0.0642159	3.56433e-33	52363
Sun	GART_P22102_OID31004	rs2834234	21	34894623	C	T	0.773085	-0.1279	0.00734102	2.77734e-68	52363
Sun	GAS2_O43903_OID31285	rs34126473	11	22703379	AT	A	0.303344	-0.117869	0.00683236	5.44411e-67	52363
Sun	GAS6_Q14393_OID20318	rs6602909	13	114551993	C	T	0.34081	-0.332675	0.00630195	0	52363
Sun	GASK1A_Q9UFP1_OID30109	rs1807403	3	43102291	T	C	0.316329	-0.756792	0.00684556	0	52363
Sun	GATD3_P0DPI2_OID30253	rs2187313	21	45544594	C	T	0.809753	-0.135415	0.00794131	1.68967e-65	52363
Sun	GBP1_P32455_OID31128	rs148526074	1	89523756	T	G	0.0255424	-1.32784	0.0194924	0	52363
Sun	GBP2_P32456_OID20489	rs1329123	1	89548920	C	T	0.779962	0.126321	0.0076141	4.08838e-62	52363
Sun	GBP4_Q96PP9_OID20845	rs608339	1	89652078	T	A	0.495694	-0.810284	0.00631357	0	52363
Sun	GC_P02774_OID30780	rs1352846	4	72617775	G	A	0.284388	1.21188	0.00683268	0	52363
Sun	GCHFR_P30047_OID30631	rs12903072	15	41088581	G	A	0.463699	0.111134	0.00602802	3.36319e-76	52363
Sun	GCLM_P48507_OID30059	rs774698707	1	94383448	T	TTAA	0.50262	-0.0550163	0.0063015	1.26587e-18	52363
Sun	GCNT1_Q02742_OID21379	rs2282683	9	79117751	G	A	0.213277	-0.498231	0.00714245	0	52363
Sun	GDF15_Q99988_OID20251	rs1054221	19	18499858	C	T	0.142362	0.376783	0.00727553	0	52363
Sun	GDNF_P39905_OID20861	rs62360373	5	37820741	A	G	0.0923787	-0.394843	0.0104884	0	52363
Sun	GFAP_P14136_OID21247	rs59291670	17	42991449	T	C	0.019887	0.254231	0.0203659	4.61197e-36	52363
Sun	GFER_P55789_OID21259	-	16	2023324	G	GA	0.117808	-0.0912416	0.00963726	1.43191e-21	52363
Sun	GFRA1_P56159_OID21457	rs11197603	10	118001771	C	T	0.146539	-0.292623	0.00810098	5.13441e-286	52363
Sun	GFRA2_O00451_OID21330	rs1480999	8	21474088	A	G	0.555372	0.293541	0.00629363	0	52363
Sun	GFRA3_O60609_OID20933	rs56259296	5	137480609	A	T	0.363036	0.0949557	0.00660716	3.89836e-47	52363
Sun	GFRAL_Q6UXV0_OID31091	rs72988065	6	55484581	G	A	0.159581	0.374495	0.00816675	0	52363
Sun	GGACT_Q9BVM4_OID30290	rs9585457	13	101202606	C	A	0.516916	-0.443589	0.00612812	0	52363
Sun	GGCT_O75223_OID30304	rs4259	7	30543734	A	G	0.716717	-0.117125	0.00678821	5.20441e-67	52363
Sun	GGH_Q92820_OID20416	rs77642645	8	63932672	A	G	0.0671664	0.720656	0.0120374	0	52363
Sun	GGT1_P19440_OID21075	rs3859862	22	24997070	G	A	0.348675	0.250404	0.00594811	0	52363
Sun	GGT5_P36269_OID20909	rs5760275	22	24643449	G	C	0.205644	0.32916	0.00756265	0	52363
Sun	GHR_P10912_OID30574	rs6873545	5	42631264	C	T	0.27604	-0.685115	0.00691009	0	52363
Sun	GHRL_Q9UBU3_OID20175	rs34911341	3	10331519	T	C	0.00591925	1.38002	0.0377761	1.74965e-292	52363
Sun	GIMAP7_Q8NHV1_OID30639	rs3735080	7	150217309	T	C	0.225275	-0.600187	0.0072917	0	52363
Sun	GIMAP8_Q8ND71_OID31194	-	7	150171599	C	CAGATATAGTGCCTTCAACTACCGGGCAACAGGAGA	0.012996	-0.919677	0.0293608	1.1242e-215	52363
Sun	GIP_P09681_OID30288	rs72833611	17	47036043	G	C	0.127654	0.0598131	0.0088796	8.13959e-12	52363
Sun	GIPC2_Q8TF65_OID31153	rs7537908	1	78518939	G	A	0.202687	-0.299014	0.00726868	0	52363
Sun	GIPC3_Q8TF64_OID31507	rs34722692	19	3585519	A	G	0.110638	-0.424788	0.00973589	0	52363
Sun	GIT1_Q9Y2X7_OID30533	rs138723501	17	27915411	T	C	0.0201976	0.225073	0.023006	6.64498e-23	52363
Sun	GLA_P06280_OID30594	rs3027578	X	100664308	A	T	0.0144877	1.52679	0.0208303	0	52363
Sun	GLB1_P16278_OID20949	rs17522953	3	33138764	C	G	0.601277	0.219874	0.00606978	1.25827e-287	52363
Sun	GLO1_Q04760_OID20107	rs4746	6	38650628	G	T	0.449077	-0.325834	0.00612216	0	52363
Sun	GLRX_P35754_OID20195	rs6556886	5	95163449	A	G	0.129094	-0.746705	0.00897586	0	52363
Sun	GLRX5_Q86SX6_OID30663	rs910792	14	95996822	G	A	0.426899	-0.112657	0.00626626	1.43974e-72	52363
Sun	GLT8D2_Q9H1C3_OID20825	rs117801489	12	104408832	C	T	0.0161316	0.653756	0.0249487	1.19597e-151	52363
Sun	GM2A_P17900_OID30413	rs153478	5	150639439	G	A	0.660014	-0.664097	0.00622745	0	52363
Sun	GMFG_O60234_OID30340	rs251906	19	39826838	G	C	0.101029	-0.115544	0.010788	4.54746e-27	52363
Sun	GMPR_P36959_OID20641	rs1042391	6	16290761	A	T	0.405038	0.251524	0.00617041	0	52363
Sun	GMPR2_Q9P2T1_OID30623	rs199867463	14	24706267	C	T	0.00166868	-1.60553	0.0804929	8.08108e-89	52363
Sun	GNAS_O95467_OID31008	rs2296528	20	57274151	C	G	0.637566	0.0754471	0.00633023	4.73772e-33	52363
Sun	GNLY_P22749_OID21132	rs7603438	2	85935182	G	A	0.238862	0.702106	0.0071653	0	52363
Sun	GNPDA1_P46926_OID30197	rs2232195	5	141387520	G	A	0.279454	-0.0978435	0.00715647	7.45834e-43	52363
Sun	GNPDA2_Q8TDQ7_OID30597	rs769805766	4	44727151	C	CTATTA	0.623095	0.24053	0.00637859	0	52363
Sun	GOLGA3_Q08378_OID31026	rs11147139	12	133457651	A	G	0.213658	0.122237	0.00740878	1.86702e-61	52363
Sun	GOLM2_Q6P4E1_OID21044	rs550761239	15	44670474	T	C	0.00408365	0.592805	0.0529439	2.11241e-29	52363
Sun	GORASP2_Q9H8Y8_OID31438	rs753954550	2	171825178	T	TAAAGG	0.280998	0.054516	0.00684609	8.39007e-16	52363
Sun	GP1BA_P07359_OID20381	rs553749201	17	4837195	A	C	0.0578956	-0.256835	0.0133493	8.62913e-83	52363
Sun	GP1BB_P13224_OID30174	rs547921381	22	19711755	T	C	0.00442525	-0.990816	0.0498497	3.27884e-88	52363
Sun	GP2_P55259_OID20090	rs36017565	16	20331498	C	G	0.479516	-0.227152	0.00554379	0	52363
Sun	GP5_P40197_OID30611	rs544985059	3	194121175	T	G	0.24746	-0.144621	0.00734742	1.50105e-86	52363
Sun	GP6_Q9HCN6_OID21091	rs1613662	19	55536595	A	G	0.831959	0.393195	0.00826019	0	52363
Sun	GPA33_Q99795_OID21376	rs72689399	1	167038121	T	C	0.0151647	-0.708717	0.0239867	3.66893e-192	52363
Sun	GPC1_P35052_OID21438	rs11892254	2	241405864	T	C	0.110823	0.499694	0.00933041	0	52363
Sun	GPC5_P78333_OID20944	rs342706	13	92417058	C	T	0.277212	-0.866532	0.00690369	0	52363
Sun	GPD1_P21695_OID31358	rs35428353	12	50500071	A	G	0.00246017	-1.18373	0.0615256	8.62115e-83	52363
Sun	GPHA2_Q96T91_OID31437	rs200683903	11	64738735	AC	A	0.0477897	0.478116	0.0140751	3.20556e-253	52363
Sun	GPIHBP1_Q8IV16_OID31469	rs6420185	8	144303071	A	G	0.390877	-0.259551	0.00635367	0	52363
Sun	GPNMB_Q14956_OID20173	rs75801644	7	23306141	A	G	0.0218771	-1.07442	0.02108	0	52363
Sun	GPR158_Q5T848_OID31013	rs78985567	10	25464527	A	C	0.00421764	-1.02133	0.049601	1.65527e-94	52363
Sun	GPR15L_Q6UWK7_OID31511	rs4399275	10	85918938	G	T	0.427988	0.216467	0.00609766	2.45669e-276	52363
Sun	GPR37_O15354_OID20095	rs1860147	7	124130172	T	C	0.258981	-0.769842	0.00688795	0	52363
Sun	GPRC5C_Q9NQ84_OID31340	rs2670824	17	72438972	G	C	0.925966	-0.218422	0.0118825	9.18469e-76	52363
Sun	GRAP2_O75791_OID20192	rs148328786	22	40342993	G	A	0.0130894	0.284863	0.0282472	3.22989e-24	52363
Sun	GRHPR_Q9UBQ7_OID30289	rs4878690	9	37422656	T	C	0.320592	0.263919	0.00654229	0	52363
Sun	GRIK2_Q13002_OID30977	rs59321237	6	101329742	T	C	0.0295834	0.723556	0.0182499	0	52363
Sun	GRK5_P34947_OID20066	rs10886430	10	121010256	G	A	0.12221	-0.389423	0.00979388	0	52363
Sun	GRN_P28799_OID21159	rs5848	17	42430244	T	C	0.290191	-0.249898	0.00622739	0	52363
Sun	GRP_P07492_OID30264	rs9957264	18	56881633	A	C	0.165178	0.441574	0.00829218	0	52363
Sun	GRPEL1_Q9HAV7_OID21309	rs56659624	4	7069377	C	G	0.0944881	-0.0811361	0.0105025	5.57477e-15	52363
Sun	GSN_P06396_OID30714	rs116185403	9	124083642	T	C	0.00649857	1.02672	0.0376341	3.50258e-164	52363
Sun	GSR_P00390_OID30700	rs8190982	8	30556381	TCC	T	0.327486	-0.126377	0.00657232	1.06502e-82	52363
Sun	GSTA1_P08263_OID20166	rs6458871	6	52665977	T	C	0.579661	0.318199	0.00608584	0	52363
Sun	GSTA3_Q16772_OID21242	rs6458871	6	52665977	T	C	0.579896	0.314034	0.00625322	0	52363
Sun	GSTM4_Q03013_OID30164	rs140584594	1	110232983	G	A	0.722863	-0.424563	0.0070051	0	52363
Sun	GSTP1_P09211_OID20876	rs762803	11	67352256	A	C	0.43922	0.195763	0.00638203	6.30674e-207	52363
Sun	GSTT2B_P0CG30_OID31097	rs5751777	22	24267047	T	C	0.585093	-1.03507	0.00629373	0	52363
Sun	GUCA2A_Q02747_OID21101	rs142157365	1	42628591	T	A	0.0021466	-2.13562	0.0644819	7.7398e-241	52363
Sun	GUSB_P08236_OID20296	rs199762976	7	66238069	T	TG	0.514719	0.125425	0.00567241	1.22732e-108	52363
Sun	GYS1_P13807_OID20097	rs10853805	19	49540093	C	A	0.621511	-0.0440477	0.00644275	4.04949e-12	52363
Sun	GZMA_P12544_OID20663	rs6898349	5	54489940	T	C	0.215938	0.0723366	0.00720782	5.30211e-24	52363
Sun	GZMB_P10144_OID20604	rs8192918	14	25101878	CT	C	0.231685	-0.350068	0.00693891	0	52363
Sun	GZMH_P20718_OID20096	rs190749747	14	25076303	G	C	0.0103094	-0.90262	0.0307257	5.44831e-190	52363
Sun	HADH_Q16836_OID30132	rs3796939	4	108948091	A	T	0.915372	-0.0973696	0.0114285	7.98502e-18	52363
Sun	HAGH_Q16775_OID21459	rs115389912	16	1869974	A	G	0.00489355	-0.782268	0.0413296	3.38189e-80	52363
Sun	HAVCR1_Q96D42_OID21422	rs6878069	5	156471069	G	A	0.4809	-0.456088	0.00549358	0	52363
Sun	HAVCR2_Q8TDQ0_OID21137	rs116363290	5	156536137	T	C	0.00545067	-1.65618	0.0425652	0	52363
Sun	HBEGF_Q99075_OID21465	rs6869910	5	139629450	C	T	0.440295	-0.0489091	0.00604688	3.02467e-16	52363
Sun	HBQ1_P09105_OID21433	rs3760047	16	281299	A	G	0.80372	0.449638	0.00752306	0	52363
Sun	HBZ_P02008_OID30307	rs2461286	16	203254	G	A	0.660192	-1.02774	0.00651992	0	52363
Sun	HCLS1_P14317_OID20648	rs78654812	3	121377905	A	C	0.142252	-0.107179	0.00869216	3.1016e-35	52363
Sun	HDDC2_Q7Z4H3_OID31447	rs3734643	6	125622832	G	A	0.192528	-0.866471	0.00784757	0	52363
Sun	HDGF_P51858_OID21455	rs3806417	1	156711623	A	C	0.325646	1.15549	0.00655111	0	52363
Sun	HDGFL2_Q7Z4V5_OID31136	rs8887	19	4502201	C	T	0.562445	-0.0475776	0.00621423	9.57322e-15	52363
Sun	HEBP1_Q9NRV9_OID20063	rs1941	12	13128263	G	C	0.035715	-0.2935	0.0168838	5.4988e-68	52363
Sun	HEG1_Q9ULI3_OID30579	rs6438868	3	124728472	G	C	0.615706	0.104211	0.00581662	4.41729e-72	52363
Sun	HEPACAM2_A8MVW5_OID31151	rs145244580	7	92825188	T	C	0.00483516	-0.30222	0.0379199	7.93643e-16	52363
Sun	HEPH_Q9BQS7_OID30337	rs746745116	X	65412393	A	G	0.00224929	-1.50182	0.0521784	1.78082e-182	52363
Sun	HEXIM1_O94992_OID20589	rs36160143	17	43244389	T	C	0.191287	0.0873582	0.00780023	2.05162e-29	52363
Sun	HGF_P14210_OID20656	rs5745687	7	81359051	T	C	0.062969	-0.183077	0.0120856	3.88414e-52	52363
Sun	HGFAC_Q04756_OID30718	rs4690097	4	3445745	T	C	0.683322	-0.490531	0.00662392	0	52363
Sun	HIP1R_O75146_OID31141	rs11060065	12	123286491	G	A	0.0341738	-0.248941	0.0165465	1.86353e-51	52363
Sun	HJV_Q6ZVN8_OID31006	rs41302089	1	145475529	T	G	0.0147706	-0.598903	0.025832	3.26068e-119	52363
Sun	HMBS_P08397_OID21385	rs72997349	11	118945502	C	T	0.0284501	0.382561	0.0177449	2.18307e-103	52363
Sun	HMCN2_Q8NDA2_OID30592	rs1105797	9	133051139	G	A	0.523306	0.608491	0.00615785	0	52363
Sun	HMOX1_P09601_OID20217	rs2071747	22	35777185	C	G	0.0560951	-0.161943	0.012893	1.73982e-36	52363
Sun	HMOX2_P30519_OID20887	rs2270363	16	4526292	G	A	0.735316	-0.111728	0.00699878	1.13967e-57	52363
Sun	HNMT_P50135_OID20975	rs11558538	2	138759649	T	C	0.104467	-1.11533	0.00978511	0	52363
Sun	HPCAL1_P37235_OID20615	rs375285744	2	10476228	C	T	0.155903	0.21306	0.00852918	5.02665e-138	52363
Sun	HPGDS_O60760_OID21266	rs4282187	4	95273145	C	T	0.615437	0.459153	0.00645591	0	52363
Sun	HPSE_Q9Y251_OID30409	rs61751211	4	84223426	C	T	0.01055	-0.796557	0.0334459	1.13249e-125	52363
Sun	HRC_P23327_OID30211	rs148966785	19	49658233	A	G	0.00775936	-0.693431	0.0351394	5.53603e-87	52363
Sun	HRG_P04196_OID30770	rs9898	3	186390627	T	C	0.343232	0.462985	0.00648363	0	52363
Sun	HS1BP3_Q53T59_OID30243	rs77551133	2	20840823	A	G	0.00639299	-0.895896	0.0387649	1.79415e-118	52363
Sun	HS3ST3B1_Q9Y662_OID21303	rs17669311	17	13837051	A	G	0.380707	0.320152	0.00643859	0	52363
Sun	HS6ST1_O60243_OID21441	rs13014395	2	129072273	T	G	0.204879	-0.245553	0.00743316	1.28558e-239	52363
Sun	HS6ST2_Q96MM7_OID30481	rs2187831	X	131869906	C	T	0.508466	-0.20601	0.00495666	0	52363
Sun	HSBP1_O75506_OID30232	rs707236	16	83803160	A	T	0.335871	-0.567555	0.00651911	0	52363
Sun	HSD11B1_P28845_OID20575	rs559561805	1	210106023	A	G	0.000499904	-1.10774	0.142586	3.95774e-15	52363
Sun	HSD17B14_Q9BPX1_OID31098	rs35299026	19	49318380	A	G	0.045856	-1.55135	0.0146413	0	52363
Sun	HSDL2_Q6YN16_OID30256	rs10817342	9	115199507	T	C	0.386549	0.588142	0.00632748	0	52363
Sun	HSPA2_P54652_OID31424	rs12894807	14	65043404	G	A	0.805169	0.126215	0.00767416	4.42446e-61	52363
Sun	HSPB1_P04792_OID20230	rs2908203	7	75924218	T	G	0.245818	-0.554043	0.00719031	0	52363
Sun	HSPG2_P98160_OID20383	rs6695528	1	22148164	A	G	0.294985	-0.168808	0.00650593	9.88239e-149	52363
Sun	HYAL1_Q12794_OID20357	rs116482870	3	50339622	T	C	0.0617706	-0.542109	0.0126893	0	52363
Sun	HYOU1_Q9Y4L1_OID20300	rs2509121	11	118928253	T	C	0.398564	0.172867	0.00610421	9.99663e-177	52363
Sun	ICAM1_P05362_OID20411	rs5030379	19	10393605	CTTGATTGA	C	0.369876	0.413316	0.00627133	0	52363
Sun	ICAM2_P13598_OID20248	rs574698129	17	62099874	C	CA	0.190704	0.0912382	0.00611445	1.19002e-50	52363
Sun	ICAM3_P32942_OID20277	rs61451658	19	10451920	T	C	0.308541	0.30914	0.00639019	0	52363
Sun	ICAM4_Q14773_OID20578	rs5030377	19	10393234	G	A	0.374219	-0.109719	0.00538438	1.33026e-92	52363
Sun	ICAM5_Q9UMF0_OID20145	rs281439	19	10400110	C	G	0.77286	0.807	0.0070358	0	52363
Sun	ICOSLG_O75144_OID21351	rs780593238	21	45647836	A	ACTGGACCACCCCGTCTC	0.720747	-0.393993	0.00694221	0	52363
Sun	IDI2_Q9BXS1_OID20823	rs1044261	10	1065710	T	C	0.0745185	-0.605073	0.0116519	0	52363
Sun	IDO1_P14902_OID31474	rs7010461	8	39781444	T	C	0.340825	0.274569	0.00653733	0	52363
Sun	IDS_P22304_OID20619	rs61736892	X	148579705	A	G	0.00125445	-0.809801	0.077625	8.83562e-26	52363
Sun	IDUA_P35475_OID21468	rs3796622	4	983060	C	T	0.641871	0.521978	0.00629766	0	52363
Sun	IFI30_P13284_OID31505	rs273266	19	18283501	C	T	0.221458	-0.49846	0.00706599	0	52363
Sun	IFIT3_O14879_OID31283	rs17096301	10	91096117	A	C	0.245899	-0.117008	0.00716818	3.37232e-60	52363
Sun	IFNAR1_P17181_OID31491	rs914142	21	34725807	A	G	0.735262	-0.442276	0.00696287	0	52363
Sun	IFNGR1_P15260_OID20678	rs9376267	6	137531031	T	C	0.242656	-0.193638	0.00695403	6.11652e-171	52363
Sun	IFNGR2_P38484_OID20941	rs9808753	21	34787312	G	A	0.146743	1.4118	0.00873733	0	52363
Sun	IFNL1_Q8IU54_OID20795	rs30461	19	39789115	G	A	0.120616	-0.0879517	0.0100468	1.02778e-18	52363
Sun	IFNLR1_Q8IU57_OID20506	rs139958347	1	24513723	C	G	0.0372761	-0.939817	0.0179431	0	52363
Sun	IGBP1_P78318_OID31059	rs113690423	X	69402868	T	C	0.137792	-0.075804	0.00722871	4.98162e-26	52363
Sun	IGDCC4_Q8TDY8_OID30402	rs56362513	15	65801720	C	T	0.0193085	0.948856	0.0212134	0	52363
Sun	IGF1R_P08069_OID21274	rs3743249	15	99505423	T	G	0.263072	0.11285	0.00653132	3.42789e-67	52363
Sun	IGF2R_P11717_OID21146	rs2297363	6	160506462	A	G	0.134547	0.556243	0.00886741	0	52363
Sun	IGFBP1_P08833_OID20246	-	7	45915378	A	ATG	0.520164	-0.0494707	0.00600853	9.09779e-17	52363
Sun	IGFBP2_P18065_OID20325	rs4674100	2	217480424	A	G	0.292601	-0.066021	0.00686196	3.25011e-22	52363
Sun	IGFBP3_P17936_OID20398	rs2854746	7	45960645	C	G	0.399562	0.450744	0.00601675	0	52363
Sun	IGFBP4_P22692_OID21158	rs1668339	17	38615982	C	T	0.317758	0.0503694	0.00626199	4.35925e-16	52363
Sun	IGFBP6_P24592_OID20413	rs10876406	12	53501437	C	T	0.107001	-0.13114	0.00875219	4.69372e-51	52363
Sun	IGFBP7_Q16270_OID20236	rs6827768	4	57952002	A	T	0.788846	-0.393344	0.00701435	0	52363
Sun	IGFBPL1_Q8WX77_OID20155	rs7857243	9	38409081	A	G	0.806782	0.470732	0.00729659	0	52363
Sun	IGHMBP2_P38935_OID30123	rs10896373	11	68614810	T	A	0.525092	-0.0733642	0.00639384	8.89071e-31	52363
Sun	IGLC2_P0DOY2_OID30740	rs2856876	22	23249440	A	C	0.127975	0.223344	0.00912114	1.03077e-132	52363
Sun	IGSF21_Q96ID5_OID30210	rs9660126	1	18444597	T	C	0.317946	-0.152735	0.0064604	7.17957e-124	52363
Sun	IGSF3_O75054_OID21312	rs2284860	1	117122887	C	T	0.21689	0.113676	0.00731332	8.77841e-55	52363
Sun	IGSF8_Q969P0_OID20167	rs12092798	1	160071819	C	T	0.217811	0.150296	0.0073884	2.72399e-92	52363
Sun	IGSF9_Q9P2J2_OID30330	rs3747617	1	159912899	T	C	0.0536815	-0.482854	0.0134125	4.13792e-284	52363
Sun	IL10_P22301_OID20431	rs3024505	1	206939904	A	G	0.149462	-0.135831	0.00872212	5.53949e-55	52363
Sun	IL10RA_Q13651_OID20420	rs3135932	11	117864063	G	A	0.160274	0.183359	0.00855191	2.78799e-102	52363
Sun	IL10RB_Q08334_OID20696	rs2515717	21	34662282	A	G	0.441891	0.514873	0.00604115	0	52363
Sun	IL12A_IL12B_P29459_P29460_OID21327	rs4244437	5	158773117	A	G	0.688739	0.526007	0.00635793	0	52363
Sun	IL12B_P29460_OID20666	rs4244437	5	158773117	A	G	0.688976	0.541982	0.00629253	0	52363
Sun	IL12RB1_P42701_OID20486	rs8109496	19	18190344	G	C	0.206013	-0.445837	0.00753671	0	52363
Sun	IL13RA1_P78552_OID21504	rs2495619	X	117884705	T	C	0.177332	0.815502	0.00674447	0	52363
Sun	IL15RA_Q13261_OID20498	rs3136630	10	5997820	T	C	0.303895	-0.251724	0.00666245	0	52363
Sun	IL16_Q14005_OID20633	rs4778639	15	81600451	G	T	0.0862564	-0.944394	0.0106521	0	52363
Sun	IL17C_Q9P0M4_OID20477	rs17700884	16	88684495	T	G	0.358885	-0.122188	0.00640978	2.57504e-81	52363
Sun	IL17D_Q8TAD2_OID20481	rs2818979	13	21319423	C	T	0.687735	-0.364589	0.00610138	0	52363
Sun	IL17F_Q96PD4_OID20456	rs66834286	6	52105863	CGTTTGTTT	C	0.104811	-0.250583	0.0103163	1.25001e-130	52363
Sun	IL17RA_Q96F46_OID21089	rs4819959	22	17586631	A	G	0.498622	0.836295	0.00624025	0	52363
Sun	IL17RB_Q9NRM6_OID20585	rs6445607	3	53877149	T	G	0.630123	-0.79784	0.00628658	0	52363
Sun	IL18_Q14116_OID20694	rs2250417	11	112085316	C	T	0.522487	-0.285217	0.00598966	0	52363
Sun	IL18BP_O95998_OID20348	rs5743659	11	71709878	A	G	0.00567901	-0.524902	0.0394175	9.28393e-41	52363
Sun	IL18R1_Q13478_OID20652	rs6750020	2	102994714	A	G	0.773821	-0.899028	0.00722873	0	52363
Sun	IL19_Q9UHD0_OID20158	rs2243191	1	207015957	C	T	0.777103	0.359139	0.00709607	0	52363
Sun	IL1R1_P14778_OID21116	rs2287047	2	102774054	A	G	0.301364	-0.185418	0.00661103	2.18726e-173	52363
Sun	IL1R2_P27930_OID20757	rs2310170	2	102616154	G	T	0.401649	-0.517554	0.00610781	0	52363
Sun	IL1RAP_Q9NPH3_OID21126	rs6444442	3	190346060	G	A	0.853847	-1.40487	0.00847899	0	52363
Sun	IL1RL1_Q01638_OID20250	rs12470864	2	102926362	A	G	0.383303	-0.677849	0.00582063	0	52363
Sun	IL1RL2_Q9HB29_OID20487	rs3917265	2	102778461	C	T	0.538432	-0.419897	0.00592996	0	52363
Sun	IL1RN_P18510_OID20700	rs55709272	2	113867288	C	T	0.437964	-0.214121	0.00616244	7.9257e-265	52363
Sun	IL20RA_Q9UHF4_OID20422	rs143005532	6	137330486	T	C	0.0015674	0.832249	0.0793958	5.21005e-26	52363
Sun	IL20RB_Q6UXL0_OID30461	rs756377803	3	136705090	T	TAAATAAATAAAA	0.420963	0.115195	0.0064389	6.99513e-72	52363
Sun	IL22_Q9GZX6_OID31407	rs760407193	12	68658914	A	AAGAC	0.269861	0.0952254	0.00666907	1.48626e-46	52363
Sun	IL22RA1_Q8N6P7_OID20449	rs16829209	1	24461295	T	C	0.166998	-0.336713	0.0083616	0	52363
Sun	IL2RA_P01589_OID20267	rs12722497	10	6095928	A	C	0.0861337	0.929755	0.0108739	0	52363
Sun	IL31RA_Q8NI17_OID30475	rs161651	5	55205595	T	C	0.305651	-0.614189	0.00669448	0	52363
Sun	IL32_P24001_OID20605	rs45499297	16	3115272	C	T	0.103535	-0.383138	0.0100146	0	52363
Sun	IL33_O95760_OID20428	-	9	6414150	A	ACT	0.00467656	-0.372981	0.0474372	1.8808e-15	52363
Sun	IL34_Q6ZMJ4_OID20809	rs4985556	16	70694000	A	C	0.115954	-1.09202	0.0098323	0	52363
Sun	IL36A_Q9UHA7_OID30472	rs13394409	2	113766395	T	A	0.715084	-0.0528713	0.00701812	2.46911e-14	52363
Sun	IL36G_Q9NZH8_OID30551	rs13407838	2	113745428	G	A	0.171741	-0.105488	0.00829703	2.47364e-37	52363
Sun	IL4R_P24394_OID20576	rs8060025	16	27327214	G	T	0.612161	0.30075	0.00615139	0	52363
Sun	IL5RA_Q01344_OID20601	rs77400868	3	3150964	G	A	0.131458	0.499727	0.00883889	0	52363
Sun	IL6R_P08887_OID20385	rs4129267	1	154426264	T	C	0.395159	1.08819	0.0062887	0	52363
Sun	IL6ST_P40189_OID20147	rs11742271	5	55263282	G	A	0.119134	0.264902	0.00917593	1.4536e-183	52363
Sun	IL7_P13232_OID20535	-	8	79727029	C	CCT	0.0948084	-0.177128	0.0105657	2.22105e-63	52363
Sun	IL7R_P16871_OID21136	rs6897932	5	35874575	T	C	0.261998	-0.889381	0.00661167	0	52363
Sun	IMMT_Q16891_OID31397	rs17551822	2	86422416	C	T	0.529677	-0.114139	0.00600014	5.52942e-81	52363
Sun	IMPA1_P29218_OID20907	rs2400589	8	82575783	T	C	0.300493	-0.209613	0.00672361	1.13887e-213	52363
Sun	ING1_Q9UK53_OID20853	rs71445078	13	111365952	T	G	0.178406	-0.0636255	0.00825384	6.36058e-15	52363
Sun	INHBB_P09529_OID30625	rs17050272	2	121306440	A	G	0.397802	0.354843	0.00610678	0	52363
Sun	INHBC_P55103_OID21093	rs3741414	12	57844049	T	C	0.233589	-0.655107	0.00716487	0	52363
Sun	INPP1_P49441_OID21345	rs141472596	2	191151517	G	A	0.00160774	-1.55146	0.0821149	6.41725e-80	52363
Sun	INPP5D_Q92835_OID30259	rs9247	2	234113301	T	C	0.193934	-0.207092	0.00752224	3.77495e-167	52363
Sun	INSL3_P51460_OID31129	rs8112208	19	17932742	T	C	0.270169	0.0331617	0.00449463	8.02996e-14	52363
Sun	INSL4_Q14641_OID31370	rs41313766	9	5231360	T	C	0.0189318	-0.65694	0.0232958	2.92931e-175	52363
Sun	INSL5_Q9Y5Q6_OID31448	rs11809759	1	67269905	G	A	0.390144	0.172467	0.00606474	3.46279e-178	52363
Sun	INSR_P06213_OID30566	rs1799815	19	7125519	A	G	0.0653905	-0.101129	0.0126181	5.52489e-16	52363
Sun	IPCEF1_Q8WWN9_OID20977	rs883273	6	154630541	A	C	0.32257	0.0859166	0.00654059	1.02506e-39	52363
Sun	IQGAP2_Q13576_OID21361	rs10037254	5	75930640	A	G	0.601758	0.136144	0.00623068	3.83722e-106	52363
Sun	IRAK4_Q9NWZ3_OID20577	rs183549317	12	44130443	A	G	0.000902828	-1.04482	0.101672	4.50237e-25	52363
Sun	ISLR2_Q6UXK2_OID20889	rs2062309	15	74470215	G	T	0.225097	0.237445	0.00692488	5.78655e-258	52363
Sun	ISM1_B1AKI9_OID20538	rs1998123	20	13475884	G	A	0.693346	-0.190985	0.00650092	5.22256e-190	52363
Sun	IST1_P53990_OID31497	rs79258602	16	71961535	C	A	0.0221136	-0.258612	0.0206957	3.92865e-36	52363
Sun	ITGA11_Q9UKX5_OID20581	rs2306022	15	68628163	T	C	0.085121	-0.361651	0.0107922	1.69996e-246	52363
Sun	ITGA2_P17301_OID30570	rs246414	5	52278338	G	A	0.323953	0.58936	0.00637305	0	52363
Sun	ITGA5_P08648_OID21139	rs17112108	12	54822350	T	G	0.0831719	0.0922754	0.0107365	4.17954e-18	52363
Sun	ITGA6_P23229_OID20528	rs11895564	2	173339808	A	G	0.305921	0.223043	0.00662338	6.69157e-249	52363
Sun	ITGAL_P20701_OID30537	rs11574938	16	30485393	C	G	0.514616	-0.148522	0.00626069	1.04536e-124	52363
Sun	ITGAM_P11215_OID21071	rs10665069	16	31362590	TAAATA	T	0.692731	0.159253	0.00651607	3.21128e-132	52363
Sun	ITGAV_P06756_OID21416	rs13006483	2	187522750	T	G	0.273696	-0.155934	0.0065507	1.51171e-125	52363
Sun	ITGB2_P05107_OID20315	rs760462	21	46328099	C	T	0.82545	0.145924	0.00770654	2.93098e-80	52363
Sun	ITGB5_P18084_OID21522	rs2291090	3	124515646	C	A	0.0336232	0.218803	0.0165185	2.38152e-40	52363
Sun	ITGB6_P18564_OID20493	rs146596903	2	160975557	T	C	0.685223	0.285849	0.00628215	0	52363
Sun	ITGB7_P26010_OID21393	rs12824946	12	53592452	C	T	0.093476	0.201076	0.0101468	1.06854e-87	52363
Sun	ITGBL1_O95965_OID30408	rs1034270	13	102108397	T	C	0.844608	-0.366869	0.00809795	0	52363
Sun	ITIH1_P19827_OID30722	rs678	3	52820981	T	A	0.348623	-0.135765	0.00654136	5.54042e-96	52363
Sun	ITIH3_Q06033_OID20352	rs9881468	3	52828628	T	C	0.334339	0.30474	0.00615462	0	52363
Sun	ITIH4_Q14624_OID30762	rs4687552	3	52838402	C	T	0.335038	0.259964	0.00623222	0	52363
Sun	ITIH5_Q86UX2_OID31430	rs41298373	10	7622009	A	G	0.0969424	0.164799	0.0105156	1.17793e-55	52363
Sun	ITM2A_O43736_OID20504	rs13789	X	78616214	G	C	0.664967	-0.180926	0.00549447	4.26283e-238	52363
Sun	ITPA_Q9BY32_OID30082	rs1127354	20	3193842	A	C	0.0749477	-1.20143	0.0117352	0	52363
Sun	ITPR1_Q14643_OID30216	rs76604555	3	4856285	A	G	0.119579	-0.144109	0.00962782	5.94403e-51	52363
Sun	JAM2_P57087_OID21064	-	21	26914531	C	CCA	0.0521896	0.136702	0.0131907	1.81682e-25	52363
Sun	JAM3_Q9BX67_OID30586	rs94499	11	134023728	G	A	0.221301	0.112803	0.00737068	3.57912e-53	52363
Sun	JPT2_Q9H910_OID31520	rs4424913	16	1698528	T	C	0.174565	0.0601855	0.0084186	4.36711e-13	52363
Sun	KAZALD1_Q96I82_OID21339	rs11190812	10	102824292	A	G	0.0382048	-1.70422	0.0160827	0	52363
Sun	KCTD5_Q9NXV2_OID31148	rs71386687	16	2767894	T	G	0.0787469	0.0833853	0.0118014	7.98969e-13	52363
Sun	KDR_P35968_OID21497	rs34231037	4	55972946	G	A	0.0326949	-1.32394	0.0164907	0	52363
Sun	KEL_P23276_OID20881	rs8176058	7	142655008	A	G	0.0388142	0.652589	0.0142957	0	52363
Sun	KHK_P50053_OID30241	rs2304681	2	27315252	A	G	0.367672	-0.433494	0.00636314	0	52363
Sun	KIAA0319_Q5VV43_OID31094	rs3181238	6	24654443	T	C	0.639211	0.294315	0.00635239	0	52363
Sun	KIF1C_O43896_OID30163	rs148934699	17	4925475	T	C	0.00567862	-0.522527	0.0411068	2.55395e-37	52363
Sun	KIFBP_Q96EK5_OID21320	rs149884151	10	70634018	G	A	0.00852422	0.246498	0.0336161	1.1275e-13	52363
Sun	KIR2DL2_P43627_OID31431	rs60955532	19	55253196	A	C	0.551455	0.616697	0.00606389	0	52363
Sun	KIR2DL3_P43628_OID21196	rs17273316	19	55246904	T	C	0.0403942	-0.847757	0.0145541	0	52363
Sun	KIR2DS4_P43632_OID31432	rs7255036	19	55338699	C	G	0.231034	1.3177	0.00757413	0	52363
Sun	KIR3DL1_P43629_OID21185	rs12150998	19	55343039	G	A	0.553845	-0.918638	0.00637082	0	52363
Sun	KIR3DL2_P43630_OID31191	rs7255106	19	55352993	T	C	0.0356117	0.349056	0.0173369	1.86987e-90	52363
Sun	KIRREL2_Q6UWL6_OID20873	rs393116	19	36348198	G	A	0.0455195	-0.435763	0.0149589	7.33832e-187	52363
Sun	KIT_P10721_OID20370	rs218263	4	55408104	T	C	0.130437	-0.0648835	0.00851561	1.27468e-14	52363
Sun	KITLG_P21583_OID20196	rs11610944	12	89386224	G	A	0.641647	-0.0576758	0.00623841	1.17321e-20	52363
Sun	KLB_Q86Z14_OID20888	rs13103023	4	39457617	A	G	0.323526	-0.769375	0.00650871	0	52363
Sun	KLK1_P06870_OID21499	rs601338	19	49206674	A	G	0.50093	0.886048	0.00621073	0	52363
Sun	KLK10_O43240_OID21523	rs2569454	19	51523203	C	T	0.585004	0.576493	0.00640234	0	52363
Sun	KLK11_Q9UBX7_OID21518	rs117268623	19	51527970	T	C	0.0305329	-1.15278	0.0174157	0	52363
Sun	KLK12_Q9UKR0_OID21201	rs3745540	19	51535130	G	A	0.576512	-1.16413	0.00633523	0	52363
Sun	KLK13_Q9UKR3_OID21291	rs3760739	19	51538561	T	G	0.345404	-0.449255	0.00635877	0	52363
Sun	KLK14_Q9P0G3_OID21407	rs2569491	19	51584916	A	G	0.316304	0.402085	0.00649191	0	52363
Sun	KLK15_Q9H2R5_OID31427	rs73048483	19	51340543	A	G	0.069309	1.41557	0.0121701	0	52363
Sun	KLK3_P07288_OID30364	rs62113212	19	51360840	T	C	0.070951	-0.0996953	0.00745059	3.91185e-41	52363
Sun	KLK4_Q9Y5K2_OID21391	rs2664153	19	51415252	A	G	0.636851	-0.397971	0.00601511	0	52363
Sun	KLK6_Q92876_OID21526	rs268891	19	51471983	C	A	0.645956	-0.189693	0.00638485	2.86357e-194	52363
Sun	KLK7_P49862_OID30652	rs2659067	19	51485622	G	A	0.912043	0.680996	0.0105871	0	52363
Sun	KLK8_O60259_OID21517	rs74705037	19	51504808	A	G	0.0427053	1.03615	0.0148749	0	52363
Sun	KLKB1_P03952_OID30760	rs4253306	4	187174030	T	G	0.109008	-0.560938	0.00917843	0	52363
Sun	KLRB1_Q12918_OID20629	-	12	9749022	G	GTT	0.00620977	-1.0752	0.0371204	9.02922e-185	52363
Sun	KLRD1_Q13241_OID20632	rs7135494	12	10470093	T	C	0.591798	-0.416919	0.00594441	0	52363
Sun	KLRF1_Q9NZS2_OID30464	rs146460124	12	9984965	A	G	0.00261042	2.71031	0.0587445	0	52363
Sun	KLRK1_P26718_OID31082	rs1600128	12	10536158	A	G	0.695387	-0.514347	0.00677125	0	52363
Sun	KRT18_P05783_OID21296	rs9668670	12	53278512	A	T	0.657958	0.0434255	0.00611155	5.99523e-13	52363
Sun	KRT19_P08727_OID20596	rs7405611	17	39691412	A	G	0.627354	0.148377	0.0062382	2.37471e-125	52363
Sun	KRT5_P13647_OID20860	rs607860	12	52913029	T	C	0.406835	-0.0926862	0.00604255	2.10058e-53	52363
Sun	KYAT1_Q16773_OID20232	rs2293968	9	131587240	A	G	0.691914	-0.141105	0.00675229	2.82977e-97	52363
Sun	KYNU_Q16719_OID20669	rs78189771	2	143635782	G	A	0.049683	0.551589	0.0136561	0	52363
Sun	L1CAM_P32004_OID21484	rs73627241	X	153152126	T	G	0.238058	0.137597	0.00562749	2.46343e-132	52363
Sun	LACRT_Q9GZZ8_OID31367	rs1157486	12	54997283	C	G	0.692174	0.073065	0.00659756	8.33589e-29	52363
Sun	LACTB2_Q53H82_OID20150	rs192390871	8	71806742	C	T	0.00676776	-1.08605	0.0384598	9.83061e-176	52363
Sun	LAG3_P18627_OID21315	rs3782735	12	6885076	A	G	0.605385	0.17446	0.00619851	1.36122e-174	52363
Sun	LAIR1_Q6GTX8_OID20737	rs111949142	19	54870191	A	T	0.179839	0.672424	0.00785509	0	52363
Sun	LAIR2_Q6ISS4_OID20965	rs73070113	19	55014172	T	A	0.128357	-1.05457	0.00959783	0	52363
Sun	LAMA4_Q16363_OID20769	rs9320394	6	112453123	T	C	0.436382	0.158404	0.00614322	6.50232e-147	52363
Sun	LAMB1_P07942_OID30280	rs403731	7	107744217	G	A	0.412433	-0.625009	0.0061872	0	52363
Sun	LAMP1_P11279_OID30416	rs114695232	13	113904818	G	A	0.00115497	-1.13099	0.105225	3.01815e-27	52363
Sun	LAMP2_P13473_OID21035	rs2008511	X	119568858	A	G	0.376963	-0.34735	0.00520943	0	52363
Sun	LAMP3_Q9UQV4_OID20638	rs11921884	3	182828245	T	G	0.632794	0.225228	0.00609193	1.64205e-299	52363
Sun	LAP3_P28838_OID20436	rs114838597	4	17579994	T	C	0.0262165	0.163758	0.0195285	2.52359e-17	52363
Sun	LAT_O43561_OID20640	rs193652	16	28607617	C	T	0.38736	-0.04395	0.00643827	4.35457e-12	52363
Sun	LATS1_O95835_OID30523	rs9478848	6	150146216	T	G	0.371878	-0.0597488	0.0064766	1.41339e-20	52363
Sun	LAYN_Q6UX15_OID20970	rs542275	11	111431614	T	C	0.607299	0.361326	0.0058862	0	52363
Sun	LBP_P18428_OID20355	rs2232613	20	36997655	T	C	0.0815304	-1.17392	0.0111486	0	52363
Sun	LCAT_P04180_OID30677	rs112434994	16	67954398	C	G	0.118259	0.17525	0.00926978	5.13621e-80	52363
Sun	LCN15_Q6UWW0_OID31032	rs4880140	9	139658576	C	G	0.774479	0.652134	0.00723773	0	52363
Sun	LCN2_P80188_OID20392	rs542243688	9	130905550	A	C	0.0348891	-0.214553	0.0188095	1.93726e-30	52363
Sun	LCP1_P13796_OID30367	rs4941543	13	46708291	C	T	0.904573	-1.44745	0.0103989	0	52363
Sun	LDLR_P01130_OID20240	rs147223423	19	11232261	T	A	0.0112694	0.206413	0.0285438	2.38936e-13	52363
Sun	LDLRAP1_Q5SW96_OID31068	rs75446219	1	25877492	T	C	0.0339457	0.184688	0.0168487	2.92419e-28	52363
Sun	LECT2_O14960_OID30320	rs31515	5	135288113	G	A	0.628963	-0.788645	0.00552001	0	52363
Sun	LEFTY2_O00292_OID21454	rs360058	1	226076919	T	G	0.36116	-0.709071	0.00604422	0	52363
Sun	LEG1_Q6P5S2_OID30608	rs1398320	6	127885269	A	G	0.528278	-0.365204	0.00601545	0	52363
Sun	LEP_P41159_OID20187	rs2071045	7	127892980	C	T	0.225998	-0.0446618	0.00640111	1.50565e-12	52363
Sun	LEPR_P48357_OID20128	rs61779759	1	66161965	A	G	0.17314	-0.270212	0.00798028	1.29461e-251	52363
Sun	LGALS1_P09382_OID20154	rs4820294	22	38071043	A	G	0.333278	-0.27856	0.00640071	0	52363
Sun	LGALS3_P17931_OID20284	rs3832943	14	55606801	AATT	A	0.427655	-0.525811	0.00590141	0	52363
Sun	LGALS3BP_Q08380_OID30765	rs111526614	17	76962761	T	C	0.0178866	-0.48961	0.0232581	1.11574e-98	52363
Sun	LGALS4_P56470_OID20748	rs140695578	19	39265229	T	A	0.0307216	0.281753	0.0160114	1.29805e-69	52363
Sun	LGALS7_LGALS7B_P47929_OID21406	rs1471431	19	39260194	C	T	0.562513	0.219993	0.00573966	0	52363
Sun	LGALS8_O00214_OID21041	rs1475133	1	236716686	A	G	0.755334	0.308878	0.00687262	0	52363
Sun	LGALS9_O00182_OID20781	rs1984547	17	25963317	G	A	0.242853	-0.49946	0.00676677	0	52363
Sun	LGMN_Q99538_OID20773	rs148659834	14	93176042	A	G	0.0124924	-1.00356	0.0270874	9.33235e-301	52363
Sun	LHB_P01229_OID21248	rs3795050	19	49520863	C	A	0.0617668	-0.107756	0.0128193	2.12544e-17	52363
Sun	LHPP_Q9H008_OID20749	rs201591661	10	126158079	T	TG	0.179905	0.450576	0.00773905	0	52363
Sun	LIF_P15018_OID20824	rs1807711	22	30591169	A	G	0.385702	0.0450196	0.00651829	2.48102e-12	52363
Sun	LIFR_P42702_OID20606	rs62353655	5	38493566	A	G	0.0445883	-0.360316	0.0144721	3.98067e-137	52363
Sun	LILRA2_Q8N149_OID21152	rs28384500	19	55084982	G	A	0.113361	-0.995846	0.00967733	0	52363
Sun	LILRA3_Q8N6C8_OID30376	rs367070	19	54800500	G	A	0.224181	-1.20903	0.00740665	0	52363
Sun	LILRA5_A6NI73_OID20209	rs34464703	19	54813726	TG	T	0.321828	-0.350391	0.00637269	0	52363
Sun	LILRA6_Q6PI73_OID30346	rs11668526	19	54749060	T	C	0.589038	0.790242	0.00625345	0	52363
Sun	LILRB1_Q8NHL6_OID20323	rs367070	19	54800500	G	A	0.223894	-0.655874	0.00704991	0	52363
Sun	LILRB2_Q8N423_OID20301	rs383369	19	54784130	C	T	0.200138	-1.14723	0.00754301	0	52363
Sun	LILRB4_Q8NHJ6_OID20429	rs417477	19	55171903	G	A	0.11782	0.367015	0.00842957	0	52363
Sun	LILRB5_O75023_OID20324	rs12975366	19	54759361	C	T	0.388839	-1.18348	0.00634347	0	52363
Sun	LIPF_P07098_OID30266	rs746756189	10	90473228	C	CA	0.277088	-0.300175	0.00680457	0	52363
Sun	LMNB2_Q03252_OID31109	rs143001539	19	2426527	CAGAG	C	0.0491479	0.097812	0.0135229	2.36109e-13	52363
Sun	LMOD1_P29536_OID31014	-	1	201886769	T	TA	0.325931	-0.195547	0.0059197	1.35293e-239	52363
Sun	LONP1_P36776_OID30219	rs3892355	19	5696962	A	G	0.314733	-0.173111	0.00672049	1.28818e-146	52363
Sun	LPA_P08519_OID30747	rs56393506	6	161089307	T	C	0.171834	0.722247	0.00841814	0	52363
Sun	LPCAT2_Q7L5N7_OID21290	rs79575505	16	55590610	A	C	0.0522435	-0.251503	0.0138453	4.8653e-74	52363
Sun	LPL_P06858_OID20188	rs1801177	8	19805708	A	G	0.0181497	-1.49129	0.0203281	0	52363
Sun	LPO_P22079_OID20963	rs7219860	17	56321271	A	G	0.219549	-0.290251	0.00708484	0	52363
Sun	LRCH4_O75427_OID30191	rs62482223	7	100198878	A	C	0.214267	0.0736419	0.00746085	2.79584e-23	52363
Sun	LRG1_P02750_OID30751	rs8105192	19	4547371	G	C	0.512695	-0.560699	0.00602857	0	52363
Sun	LRIG1_Q96JA1_OID21429	rs2306272	3	66434643	C	T	0.287598	-0.85385	0.00664504	0	52363
Sun	LRIG3_Q6UXM1_OID30450	rs11172841	12	59352431	C	A	0.231267	0.0922467	0.00734672	1.83842e-36	52363
Sun	LRP1_Q07954_OID21293	rs113379328	12	57587039	A	G	0.00284566	-0.361665	0.0494719	1.33062e-13	52363
Sun	LRP11_Q86VZ4_OID20185	-	6	150110857	T	TAA	0.375539	0.59088	0.00632288	0	52363
Sun	LRPAP1_P30533_OID21059	rs143486729	4	3525656	A	G	0.0348496	-0.55101	0.0142156	0	52363
Sun	LRRC25_Q8N386_OID21333	rs754032589	19	18512817	T	TAGAAAAAAA	0.412592	-0.337311	0.00593459	0	52363
Sun	LRRC37A2_A6NM11_OID31440	rs62057151	17	43903842	T	C	0.222669	1.10072	0.00739198	0	52363
Sun	LRRC38_Q5VT99_OID30924	rs375414	1	13821441	A	G	0.323986	0.336111	0.00655212	0	52363
Sun	LRRFIP1_Q32MZ4_OID31344	rs3739038	2	238672703	G	C	0.236928	-0.0738863	0.00701624	3.11665e-26	52363
Sun	LRRN1_Q6UXK5_OID20438	rs9839475	3	3807778	A	G	0.346238	0.801408	0.00647454	0	52363
Sun	LRTM2_Q8N967_OID31020	rs41276696	12	1940514	A	G	0.0385822	-0.38046	0.0156365	4.54728e-131	52363
Sun	LSP1_P33241_OID20530	rs907612	11	1874221	T	C	0.379384	0.145979	0.00620491	1.09583e-122	52363
Sun	LTA4H_P09960_OID21452	rs2660896	12	96423782	C	T	0.43191	0.0873013	0.00610217	9.9505e-47	52363
Sun	LTBP2_Q14767_OID20254	rs888414	14	75104905	A	G	0.383039	-0.103207	0.00520225	6.86948e-88	52363
Sun	LTBP3_Q9NS15_OID21191	rs4099470	11	65319986	T	C	0.0569315	0.857091	0.0129291	0	52363
Sun	LTBR_P36941_OID20768	-	12	6500796	A	AG	0.599154	-0.287618	0.00605003	0	52363
Sun	LUZP2_Q86TE4_OID31402	rs76794772	11	25049828	A	T	0.0341635	-0.596967	0.0175301	1.78121e-254	52363
Sun	LXN_Q9BS40_OID21003	rs8455	3	158388780	C	T	0.533018	-0.165031	0.00617572	1.28739e-157	52363
Sun	LY6D_Q14210_OID20708	rs2572925	8	143867905	T	C	0.403627	-0.43352	0.00613627	0	52363
Sun	LY75_O60449_OID20580	rs72957586	2	160762687	A	G	0.531202	0.928344	0.00623383	0	52363
Sun	LY9_Q9HBG7_OID20670	rs474918	1	160771197	T	C	0.77905	-0.594363	0.00739071	0	52363
Sun	LY96_Q9Y6Y9_OID20945	rs6472812	8	74917084	G	A	0.95752	-0.195594	0.0147717	2.53895e-40	52363
Sun	LYAR_Q9NX58_OID21264	rs11723339	4	4271886	T	C	0.613523	-0.0497729	0.00644804	5.85888e-15	52363
Sun	LYPD3_O95274_OID21530	rs11666797	19	43962398	A	C	0.160357	-0.427919	0.00808299	0	52363
Sun	LYPD8_Q6UX82_OID21251	rs12748771	1	249068929	C	T	0.0985986	0.822797	0.0104443	0	52363
Sun	LYSMD3_Q7Z3D4_OID30950	rs10514327	5	89806265	A	G	0.380591	-0.0520825	0.00643585	2.92119e-16	52363
Sun	LYVE1_Q9Y5Y7_OID30728	rs114708736	11	10613380	A	T	0.0416874	0.335945	0.0150521	1.21324e-110	52363
Sun	LYZL2_Q7Z4W2_OID31180	rs116792212	10	30894447	T	C	0.0413835	0.501956	0.0144124	4.57407e-266	52363
Sun	LZTFL1_Q9NQ48_OID30637	rs1129183	3	45869972	T	C	0.0767726	-0.265058	0.0115458	6.25857e-117	52363
Sun	M6PR_P20645_OID30208	rs4883201	12	9082581	G	A	0.103844	-0.288167	0.0103753	4.43016e-170	52363
Sun	MAD1L1_Q9Y6D9_OID20904	rs143579216	7	2265063	A	G	0.00273068	1.25239	0.0610455	7.79846e-94	52363
Sun	MAGED1_Q9Y5V3_OID21181	rs34891096	X	51648038	CT	C	0.139906	-0.0553146	0.00753336	1.04726e-13	52363
Sun	MAMDC2_Q7Z304_OID30309	rs12683555	9	72594981	T	G	0.259129	0.213018	0.00668695	5.47402e-223	52363
Sun	MAMDC4_Q6UXC1_OID31342	-	9	139748276	A	ACCCTGTGGCAGAGCACAGGG	0.0186201	-0.859283	0.0227448	0	52363
Sun	MAN1A2_O60476_OID30262	rs10923344	1	118096628	A	G	0.599511	0.194597	0.00596011	4.01961e-234	52363
Sun	MAN2B2_Q9Y2E5_OID30306	rs2301791	4	6599684	A	T	0.475174	0.818376	0.00584508	0	52363
Sun	MANF_P55145_OID20707	rs9311469	3	51540035	A	C	0.868268	0.097246	0.00906637	3.84203e-27	52363
Sun	MANSC1_Q9H8J5_OID21492	rs3053800	12	12499131	CTG	C	0.499419	0.046242	0.00601053	7.1583e-15	52363
Sun	MANSC4_A6NHS7_OID30141	rs12370269	12	27924658	G	A	0.221443	0.941074	0.0073929	0	52363
Sun	MAP2_P11137_OID31138	rs113770841	2	210360867	C	G	0.0138718	0.430092	0.0259345	4.56517e-62	52363
Sun	MAP2K1_Q02750_OID31468	-	15	66657619	T	TATACATA	0.0915219	0.090566	0.0105718	5.32219e-18	52363
Sun	MAP4K5_Q9Y4K4_OID20899	rs17780143	14	50901768	A	G	0.0559622	-0.38894	0.0132932	1.74685e-188	52363
Sun	MAPK13_O15264_OID31205	rs12210904	6	36098191	A	C	0.292226	0.058466	0.00693296	1.68385e-17	52363
Sun	MAPK9_P45984_OID20557	rs11738309	5	179730938	C	T	0.205879	0.137932	0.00757913	2.63164e-74	52363
Sun	MAPKAPK2_P49137_OID31293	rs181345810	1	206858647	G	A	0.0186034	-0.638409	0.0240241	6.83795e-156	52363
Sun	MARCO_Q9UEW3_OID20210	rs35288880	2	119728472	T	C	0.184309	-0.324458	0.00790523	0	52363
Sun	MASP1_P48740_OID20954	rs34053057	3	186982263	TA	T	0.320606	-0.205377	0.00647673	5.65887e-221	52363
Sun	MATN2_O00339_OID20767	rs1869609	8	98991221	G	A	0.644912	0.404703	0.00629821	0	52363
Sun	MATN3_O15232_OID20979	rs11694716	2	20207619	A	G	0.644285	-0.547742	0.00636673	0	52363
Sun	MAVS_Q7Z434_OID21204	rs45437096	20	3844929	T	C	0.139568	-0.124973	0.00926814	9.69421e-42	52363
Sun	MAX_P61244_OID20877	rs2781375	14	65569597	G	A	0.429624	-0.0834534	0.00633513	6.26587e-40	52363
Sun	MBL2_P11226_OID30759	rs7899547	10	54536839	G	T	0.659626	0.904537	0.00649427	0	52363
Sun	MCAM_P43121_OID20343	rs34587557	11	119185677	C	T	0.0498789	-0.312379	0.0132189	9.20278e-124	52363
Sun	MCEE_Q96PE7_OID31033	rs6716795	2	71364623	C	T	0.525887	-0.184332	0.00626143	8.63383e-191	52363
Sun	MCEMP1_Q8IX19_OID30501	rs141879681	19	7719439	G	A	0.00582941	1.43724	0.0415865	4.99901e-262	52363
Sun	MCFD2_Q8NI22_OID20171	rs6419615	2	47152291	C	G	0.715869	-0.145747	0.0068637	2.29442e-100	52363
Sun	MDGA1_Q8NFP4_OID20951	rs9349050	6	37663624	C	T	0.525094	-1.08179	0.00609012	0	52363
Sun	MDH1_P40925_OID30669	rs262493	2	63845066	A	C	0.717496	-0.0915977	0.00674243	2.44877e-42	52363
Sun	MDK_P21741_OID21489	rs541295226	11	46402339	G	A	0.00180378	-1.70499	0.0844062	4.91279e-91	52363
Sun	MDM1_Q8TC05_OID30945	rs2306393	12	68708761	T	C	0.714494	-0.196116	0.00693031	1.81315e-176	52363
Sun	MECR_Q9BV79_OID30274	rs12122508	1	29524715	T	C	0.131786	0.107348	0.00923693	1.60023e-31	52363
Sun	MEGF10_Q96KG7_OID20746	rs1422313	5	126630016	T	C	0.449201	0.40306	0.00592732	0	52363
Sun	MEGF11_A6BM72_OID30099	rs11630800	15	66535743	T	C	0.20724	0.160194	0.00774218	2.08423e-95	52363
Sun	MEGF9_Q9H1U4_OID20285	rs1867254	9	123429078	T	C	0.695695	0.326157	0.00654936	0	52363
Sun	MELTF_P08582_OID30347	rs3773862	3	196739538	T	C	0.442192	-0.404328	0.00615705	0	52363
Sun	MENT_Q9BUN1_OID30595	-	1	151020749	T	TAGTC	0.00169767	-2.28098	0.0656624	1.05209e-264	52363
Sun	MEP1A_Q16819_OID31459	rs9472860	6	46760212	C	T	0.392802	-0.186397	0.00585302	7.40673e-223	52363
Sun	MEP1B_Q16820_OID20168	rs680321	18	29797958	C	T	0.463617	-1.07034	0.00618959	0	52363
Sun	MEPE_Q9NQ76_OID20753	rs17013212	4	88754060	T	C	0.141335	-0.167718	0.00820156	3.0332e-93	52363
Sun	MERTK_Q12866_OID20657	rs10180345	2	112741293	G	A	0.625884	-0.260766	0.00596903	0	52363
Sun	MET_P08581_OID20269	rs1858830	7	116312439	G	C	0.437014	-0.158687	0.00621268	3.33126e-144	52363
Sun	METAP1D_Q6UB28_OID20519	rs138869820	2	172931008	A	G	0.00148182	-0.758335	0.0799422	1.19988e-21	52363
Sun	METAP2_P50579_OID21437	rs784487	12	95862362	A	G	0.337612	0.0548438	0.00639927	5.15984e-18	52363
Sun	MFAP4_P55083_OID30598	rs139356332	17	19289286	C	G	0.0222814	-0.714931	0.0208184	9.49562e-259	52363
Sun	MFAP5_Q13361_OID20239	rs146206713	12	8951301	A	G	0.00429445	-1.69919	0.0495897	1.30484e-257	52363
Sun	MFGE8_Q08431_OID21134	rs34239095	15	89455768	G	C	0.276695	0.382563	0.00666575	0	52363
Sun	MGLL_Q99685_OID20711	-	3	127403140	G	GA	0.553289	0.0651218	0.00614024	1.40116e-26	52363
Sun	MGMT_P16455_OID20588	rs1008982	10	131445731	C	T	0.373094	-0.398844	0.00641663	0	52363
Sun	MIA_Q16674_OID21531	rs2233159	19	41283365	G	C	0.922676	-1.33547	0.0114566	0	52363
Sun	MICALL2_Q8IY33_OID30889	rs76060706	7	1483296	C	T	0.00747389	-0.576455	0.0403741	1.50387e-46	52363
Sun	MIF_P14174_OID21073	rs2330634	22	24250795	G	C	0.591922	-0.111756	0.00623651	4.1433e-72	52363
Sun	MILR1_Q7Z6M3_OID20482	rs138176943	17	62464621	A	G	0.0565738	0.772467	0.0133269	0	52363
Sun	MINDY1_Q8N5J2_OID31399	rs140386498	1	150972959	T	A	0.0110024	-0.636914	0.0291033	1.82107e-106	52363
Sun	MINK1_Q8N4C8_OID31156	rs560504414	17	4961405	C	T	0.00310741	-0.522582	0.0548529	8.09694e-22	52363
Sun	MITD1_Q8WV92_OID20959	rs13798	2	99813614	C	T	0.649916	-0.0732004	0.0064403	3.08793e-30	52363
Sun	MME_P08473_OID21307	-	3	154799405	A	ATT	0.0852702	-0.113484	0.0113938	1.13855e-23	52363
Sun	MMP1_P03956_OID20672	rs471994	11	102697731	A	G	0.369395	-0.456829	0.00643224	0	52363
Sun	MMP10_P09238_OID20687	rs486055	11	102650424	T	C	0.153643	-0.395338	0.00855632	0	52363
Sun	MMP12_P39900_OID21439	rs17368814	11	102748695	G	A	0.120416	-0.743114	0.00868223	0	52363
Sun	MMP13_P45452_OID20807	-	11	102826877	G	GC	0.560524	-0.138826	0.00627526	9.54667e-109	52363
Sun	MMP3_P08254_OID21083	rs617819	11	102714716	G	C	0.496095	0.474578	0.00484057	0	52363
Sun	MMP7_P09237_OID20087	rs11568819	11	102401633	A	G	0.0585672	0.540787	0.0126472	0	52363
Sun	MMP8_P22894_OID21019	rs35231465	11	102584135	A	G	0.0230777	-1.24305	0.020077	0	52363
Sun	MMP9_P14780_OID21103	rs17576	20	44640225	G	A	0.355546	0.144128	0.00626905	2.9072e-117	52363
Sun	MMUT_P22033_OID30159	rs9381785	6	49400237	A	G	0.625814	-0.0992385	0.00650987	8.98052e-53	52363
Sun	MNDA_P41218_OID20156	rs2852702	1	158827428	G	C	0.564008	0.0431862	0.0060073	3.26449e-13	52363
Sun	MOCS2_O96007_OID30638	rs6880055	5	52389428	G	A	0.338271	0.45467	0.00649834	0	52363
Sun	MPHOSPH8_Q99549_OID20092	rs35424555	13	20221516	G	A	0.123894	0.0906963	0.0094885	5.97091e-22	52363
Sun	MPI_P34949_OID21288	rs4886632	15	75173925	T	G	0.548734	0.203834	0.00627602	1.08231e-231	52363
Sun	MPO_P05164_OID21100	rs34097845	17	56358429	T	C	0.0545943	-0.509413	0.0137692	6.50389e-300	52363
Sun	MRC1_P22897_OID30694	rs74118031	10	17889164	C	T	0.230765	-0.271953	0.00688805	0	52363
Sun	MRI1_Q9BV20_OID30891	rs1473197	19	13870400	G	C	0.423731	-0.340079	0.00626133	0	52363
Sun	MSLN_Q13421_OID21380	rs2235503	16	810593	A	C	0.198426	0.736645	0.00752183	0	52363
Sun	MSMB_P08118_OID20275	rs10993994	10	51549496	C	T	0.594622	0.929333	0.00586534	0	52363
Sun	MSR1_P21757_OID21063	rs41341748	8	16012594	A	G	0.0104268	-1.53218	0.0277139	0	52363
Sun	MSRA_Q9UJ68_OID21513	rs12546887	8	10292876	T	C	0.598024	-0.0558805	0.00626453	2.32844e-19	52363
Sun	MST1_P26927_OID30713	rs9823546	3	49705512	A	T	0.288787	-1.04487	0.00687038	0	52363
Sun	MSTN_O14793_OID20115	rs143242500	2	190924861	G	A	0.00191429	0.815899	0.0725574	1.2272e-29	52363
Sun	MTHFD2_P13995_OID31078	rs183347927	2	74920648	A	G	0.00235449	1.98928	0.0685277	1.42319e-185	52363
Sun	MTHFSD_Q2M296_OID31305	rs9937249	16	86560901	C	A	0.586466	0.468376	0.00629451	0	52363
Sun	MTIF3_Q9H2K0_OID31513	rs1218825	13	28009920	C	G	0.950969	0.209477	0.0144334	4.98636e-48	52363
Sun	MTSS1_O43312_OID31492	rs72716950	8	125827245	T	C	0.0406353	-0.12631	0.0155949	2.76057e-16	52363
Sun	MTSS2_Q765P7_OID31409	rs74336385	16	70772344	A	G	0.0028315	0.793659	0.0602888	7.04316e-40	52363
Sun	MTUS1_Q9ULD2_OID31315	rs142323734	8	17658751	A	G	0.040756	0.431213	0.0156368	1.05588e-167	52363
Sun	MUC13_Q9H3R2_OID20866	rs1127233	3	124627024	G	T	0.261447	0.239679	0.00697157	2.55419e-259	52363
Sun	MUC16_Q8WXI7_OID21378	rs10421318	19	9120919	A	G	0.356009	-0.0680039	0.00671934	2.23781e-24	52363
Sun	MUC2_Q02817_OID30377	rs12416873	11	1081577	A	G	0.218363	-0.274013	0.00614522	0	52363
Sun	MVK_Q03426_OID20459	rs72649064	12	109982890	T	C	0.00228975	-0.917544	0.0692253	2.12582e-40	52363
Sun	MXRA8_Q9BRK3_OID30583	rs200138692	1	1290917	C	G	0.00133034	-1.13649	0.0785551	9.73117e-48	52363
Sun	MYBPC2_Q14324_OID30199	rs1726809	19	50961104	T	G	0.127547	-0.077452	0.00916306	1.42401e-17	52363
Sun	MYDGF_Q969H8_OID30313	rs2003489	19	4655863	A	G	0.0266647	-0.294027	0.0193808	2.74969e-52	52363
Sun	MYO9B_Q13459_OID20451	rs921939	19	17314483	A	G	0.409899	-0.0441278	0.00626459	9.33961e-13	52363
Sun	MYOC_Q99972_OID21121	rs171003	1	171616521	A	G	0.586247	0.254982	0.00592328	0	52363
Sun	MYOM2_P54296_OID30131	rs117165873	8	2054077	G	A	0.00406046	0.980929	0.048073	7.54991e-93	52363
Sun	MYOM3_Q5VTT5_OID30633	rs6700245	1	24417415	C	T	0.153972	-0.0988964	0.00795413	8.61417e-36	52363
Sun	MZB1_Q8WU39_OID20732	rs140248321	5	138725772	AGAT	A	0.0619167	0.244609	0.0136345	2.84983e-72	52363
Sun	NAA80_Q93015_OID30893	rs201512291	3	50334462	A	G	0.00589938	-0.712803	0.0401208	6.43211e-71	52363
Sun	NAAA_Q02083_OID20931	rs111981122	4	76855106	C	A	0.223641	-0.664377	0.00723555	0	52363
Sun	NADK_O95544_OID20178	rs17162854	1	1693726	G	A	0.499306	0.251576	0.00601055	0	52363
Sun	NAGA_P17050_OID30509	rs121434529	22	42457056	T	C	0.0045083	-1.30778	0.0455769	2.27163e-181	52363
Sun	NAGK_Q9UJ70_OID30271	rs11680831	2	71292522	C	T	0.359344	-0.219489	0.00645875	1.97266e-253	52363
Sun	NAGPA_Q9UK23_OID30643	rs12599777	16	5079466	G	A	0.185136	-0.414393	0.00800279	0	52363
Sun	NAP1L4_Q99733_OID31475	rs57530484	11	2987643	TAACAGACCTCTC	T	0.77684	0.250581	0.00717701	2.24766e-267	52363
Sun	NAPRT_Q6XQN6_OID31114	rs9657360	8	144676862	T	C	0.779202	0.390149	0.00744036	0	52363
Sun	NBL1_P41271_OID21486	rs12408663	1	19968058	C	T	0.228662	-0.113899	0.00718283	6.27593e-57	52363
Sun	NBN_O60934_OID20442	rs118026302	8	90995426	T	C	0.00356266	-0.612343	0.0506933	6.788e-34	52363
Sun	NCAM1_P13591_OID20354	rs11214489	11	112975934	T	C	0.187297	-0.332299	0.00745875	0	52363
Sun	NCAM2_O15394_OID21095	rs2826851	21	22835946	G	A	0.272466	0.560986	0.00684415	0	52363
Sun	NCAN_O14594_OID21055	rs2228603	19	19329924	T	C	0.0724045	-0.271595	0.0109425	2.71362e-136	52363
Sun	NCF2_P19878_OID20567	rs35012521	1	183532364	A	T	0.00961349	-0.982511	0.0298117	1.66652e-238	52363
Sun	NCR1_O76036_OID20566	rs12459447	19	55409358	A	G	0.0904003	-0.413539	0.0103786	0	52363
Sun	NCR3LG1_Q68D85_OID31490	rs12146443	11	17384498	C	T	0.6287	0.339793	0.00577738	0	52363
Sun	NCS1_P62166_OID21458	rs1054879	9	132995768	A	G	0.505919	0.109525	0.00548598	5.60411e-89	52363
Sun	NECTIN2_Q92692_OID20222	rs440277	19	45361224	A	G	0.305024	-0.174098	0.00656018	1.73857e-155	52363
Sun	NECTIN4_Q96NY8_OID21490	rs35434391	1	161049509	T	G	0.109603	-0.438324	0.00969405	0	52363
Sun	NELL1_Q92832_OID21494	rs61652119	11	20955270	A	G	0.0472854	0.773224	0.013986	0	52363
Sun	NELL2_Q99435_OID20706	-	12	45272511	C	CA	0.615251	-0.171632	0.00606546	1.90175e-176	52363
Sun	NEO1_Q92859_OID31066	rs12908199	15	73371822	C	G	0.101036	0.109162	0.0101668	3.40739e-27	52363
Sun	NEXN_Q0ZGT2_OID30678	rs17387365	1	78438138	T	G	0.0761794	-0.142662	0.011373	2.14614e-36	52363
Sun	NFASC_O94856_OID20634	-	1	204951184	C	CT	0.102004	0.57461	0.00951013	0	52363
Sun	NFATC1_O95644_OID20545	rs657693	18	77162462	G	A	0.368354	-0.106383	0.00626453	5.59982e-65	52363
Sun	NFE2_Q16621_OID30268	rs60822569	12	54717508	TTTCTC	T	0.568899	0.0669372	0.00624652	4.28511e-27	52363
Sun	NFKB1_P19838_OID30160	rs230509	4	103478265	A	G	0.663425	-0.119493	0.00654372	8.50263e-75	52363
Sun	NFKBIE_O00221_OID21212	rs28362855	6	44234621	T	G	0.041761	-0.528749	0.0153734	1.56297e-259	52363
Sun	NFU1_Q9UMS0_OID31510	rs74637005	2	69650730	A	G	0.0344319	-0.325908	0.0173039	1.9741e-79	52363
Sun	NGRN_Q9NPE2_OID31115	rs201430256	15	90809487	T	G	0.00195441	0.620193	0.0769545	3.83924e-16	52363
Sun	NHLRC3_Q5JS37_OID30614	rs149175958	13	39621965	T	G	0.0041428	-2.12305	0.0473361	0	52363
Sun	NID1_P14543_OID20362	rs76183323	1	236230317	A	G	0.0104372	-0.766223	0.0314582	2.45194e-131	52363
Sun	NID2_Q14112_OID21085	rs2516600	14	52487766	C	T	0.536176	0.573733	0.00611418	0	52363
Sun	NINJ1_Q92982_OID21167	rs11379524	9	95882745	AC	A	0.614339	0.249741	0.00651485	0	52363
Sun	NIT1_Q86X76_OID30252	rs76502631	1	161088000	A	G	0.026777	-0.71721	0.0188886	0	52363
Sun	NIT2_Q9NQR4_OID30336	rs200416332	3	100057993	A	G	0.00144574	-1.27528	0.0803962	5.76613e-57	52363
Sun	NME3_Q13232_OID20789	rs749285440	16	1768076	A	G	0.00139797	3.06174	0.0864795	7.34947e-275	52363
Sun	NMI_Q13287_OID31378	rs1048135	2	152139416	A	G	0.45392	-0.446228	0.00621202	0	52363
Sun	NMNAT1_Q9HAN9_OID20913	rs79641390	1	10003710	C	G	0.0094395	0.663553	0.0318184	6.95448e-97	52363
Sun	NOMO1_Q15155_OID21106	rs3891245	16	16348287	G	T	0.226947	-0.502783	0.00723102	0	52363
Sun	NOS1_P29475_OID20863	rs3844049	12	117879324	C	T	0.436357	-0.109524	0.00590896	5.36536e-77	52363
Sun	NOS2_P35228_OID30087	-	17	26163249	T	TG	0.284056	-0.0811533	0.00699904	2.1864e-31	52363
Sun	NOS3_P29474_OID20834	rs1800783	7	150689397	T	A	0.619559	0.0479463	0.00630496	1.42963e-14	52363
Sun	NOTCH1_P46531_OID20311	rs182330532	9	139401234	A	G	0.00106513	1.21424	0.0919854	4.36609e-40	52363
Sun	NOTCH2_Q04721_OID30407	rs2453044	1	120508524	G	A	0.13994	-0.131046	0.00871677	2.20551e-51	52363
Sun	NOTCH3_Q9UM47_OID20253	rs147373451	19	15302941	C	T	0.00283925	-1.28638	0.0579262	1.46234e-109	52363
Sun	NPC2_P61916_OID30418	rs140130028	14	74947404	T	C	0.00857555	-1.98406	0.0313347	0	52363
Sun	NPDC1_Q9NQX5_OID20205	-	9	139963935	G	A	0.618374	0.101703	0.00601533	1.98748e-64	52363
Sun	NPHS1_O60500_OID30540	rs33950747	19	36339247	T	C	0.0701112	-0.77797	0.0121901	0	52363
Sun	NPL_Q9BXD5_OID30329	rs116448311	1	183096425	T	C	0.00481209	-1.68599	0.0394305	0	52363
Sun	NPPB_P16860_OID20049	rs198389	1	11919271	G	A	0.42006	0.179732	0.00615678	1.20613e-187	52363
Sun	NPPC_P23582_OID20568	rs3116222	2	232873590	C	G	0.588072	0.0466159	0.00552007	1.5228e-17	52363
Sun	NPTX1_Q15818_OID21074	rs112329494	17	78586542	T	C	0.0855601	0.827312	0.0103585	0	52363
Sun	NPTX2_P47972_OID30390	rs11760352	7	98282745	G	T	0.705351	0.336709	0.00575569	0	52363
Sun	NPTXR_O95502_OID20191	rs111577133	22	39241262	G	A	0.0209308	1.98982	0.0213282	0	52363
Sun	NPY_P01303_OID21388	rs4722337	7	24309098	T	A	0.554705	-0.156684	0.0059378	9.52024e-154	52363
Sun	NRCAM_Q92823_OID20229	rs138528835	7	107987349	TTAAA	T	0.303088	0.298047	0.00667759	0	52363
Sun	NRP1_O14786_OID20390	rs734186	10	33484829	A	G	0.37472	-0.30416	0.00621895	0	52363
Sun	NRP2_O60462_OID21081	rs761913954	2	205979199	A	AGGGGGGATTCCT	0.22757	-0.188851	0.00702234	1.32996e-159	52363
Sun	NRTN_Q99748_OID20465	rs36055559	19	5799433	A	G	0.165093	-0.0845107	0.00888188	9.08946e-22	52363
Sun	NSFL1C_Q9UNZ2_OID21022	rs6042675	20	1485256	C	G	0.406233	-0.0804199	0.00615281	2.42936e-39	52363
Sun	NT5C_Q8TCD5_OID30294	rs78625720	17	73140941	A	G	0.0293252	-1.56606	0.0179989	0	52363
Sun	NT5C3A_Q9H0P0_OID20553	rs4316067	7	33081514	G	A	0.299729	-0.115747	0.00670611	4.71112e-67	52363
Sun	NT5E_P21589_OID21498	rs2229523	6	86199233	G	A	0.675738	-0.589244	0.00661204	0	52363
Sun	NTF3_P20783_OID20591	rs55924827	12	5546570	C	G	0.111402	-0.230155	0.00981156	5.53724e-122	52363
Sun	NTproBNP_NTproBNP_OID20125	rs198389	1	11919271	G	A	0.41994	0.251287	0.00572227	0	52363
Sun	NTRK2_Q16620_OID20136	rs77562929	9	87285367	T	G	0.0068253	0.500325	0.0390177	6.09249e-38	52363
Sun	NTRK3_Q16288_OID21057	rs28735437	15	88514855	C	G	0.145112	0.250759	0.00848236	2.27442e-192	52363
Sun	NUB1_Q9Y5A7_OID20510	rs113920358	7	151038887	T	C	0.124909	-0.266427	0.00960292	1.01865e-169	52363
Sun	NUCB2_P80303_OID21448	rs214068	11	17305650	C	T	0.584487	-0.401848	0.00617233	0	52363
Sun	NUDT15_Q9NV35_OID30102	rs12429926	13	48683922	C	T	0.00384947	-0.437976	0.0519878	1.81005e-17	52363
Sun	NUDT16_Q96DE0_OID31484	rs150437674	3	131100956	G	C	0.0108194	-1.20038	0.0296486	0	52363
Sun	NUDT2_P50583_OID21308	rs7848667	9	34340949	G	A	0.163662	0.332545	0.00833887	0	52363
Sun	NUDT5_Q9UKK9_OID21115	rs6686	10	12209752	C	T	0.510376	0.0558972	0.00606101	1.4523e-20	52363
Sun	NUMB_P49757_OID30568	rs10142359	14	73884540	G	A	0.502156	0.085356	0.00620057	2.04576e-43	52363
Sun	NXPH3_O95157_OID30565	rs147028083	17	47656030	G	C	0.00669285	-2.09067	0.0375704	0	52363
Sun	OBP2B_Q9NPH6_OID20980	rs4962104	9	136087047	C	T	0.777841	0.696605	0.00621278	0	52363
Sun	OCLN_Q16625_OID31069	rs78811453	5	68822698	C	G	0.0231142	-0.442077	0.0194758	2.30273e-114	52363
Sun	ODAM_A1E959_OID20793	rs76153614	4	71061318	C	T	0.0499649	-0.58515	0.014513	0	52363
Sun	OGA_O60502_OID31465	rs34042562	10	103672925	TG	T	0.279573	-0.124882	0.00677843	4.26058e-76	52363
Sun	OGFR_Q9NZT2_OID21360	rs200108407	20	61443809	A	G	0.0012139	-1.74989	0.0878709	1.52861e-88	52363
Sun	OGN_P20774_OID21123	rs6479416	9	95053871	T	G	0.381078	0.578632	0.00590885	0	52363
Sun	OLFM4_Q6UX06_OID30665	rs17552047	13	53602462	A	G	0.275064	-0.866784	0.00734834	0	52363
Sun	OLR1_P78380_OID20183	rs936964	12	10292135	A	C	0.28117	0.0956263	0.00690533	6.52319e-44	52363
Sun	OMD_Q99983_OID20725	-	9	95106244	C	CA	0.51556	0.0737352	0.00636138	2.28692e-31	52363
Sun	OMG_P23515_OID21352	rs11080149	17	29623288	T	C	0.130497	-0.128379	0.00882606	3.12103e-48	52363
Sun	OMP_P47874_OID30835	rs2233546	11	76813961	T	C	0.0506564	-0.367745	0.0143773	1.3347e-144	52363
Sun	OPHN1_O60890_OID31087	rs145954821	X	67663257	T	C	0.0165365	-0.238891	0.0219418	6.61215e-28	52363
Sun	OPLAH_O14841_OID30201	rs55895668	8	145001031	C	T	0.439232	0.181251	0.00624988	3.22202e-185	52363
Sun	OPTC_Q9UBM4_OID21362	rs139024490	1	203468792	C	T	0.00415526	-1.73562	0.0455853	0	52363
Sun	ORM1_P02763_OID30768	rs10982156	9	117088064	A	T	0.0689611	0.721262	0.0126629	0	52363
Sun	OSCAR_Q8IYS5_OID20776	rs4442925	19	54554950	T	C	0.453175	0.507513	0.00614775	0	52363
Sun	OSM_P13725_OID20574	-	22	30554540	T	TCCCTC	0.0391736	-0.209113	0.0167769	5.84169e-36	52363
Sun	OSMR_Q99650_OID20356	rs9292723	5	38852572	T	C	0.278804	-0.586855	0.00663374	0	52363
Sun	OSTN_P61366_OID30909	rs13322016	3	190842815	G	A	0.711878	-0.0996617	0.00700873	3.45982e-46	52363
Sun	OTOA_Q7RTW8_OID30825	rs8055493	16	21771016	G	A	0.421431	-0.0539741	0.00643055	2.36165e-17	52363
Sun	OTUD7B_Q6GQQ9_OID31064	rs192984583	1	149920922	A	C	0.00155848	-0.522552	0.0769144	5.4555e-12	52363
Sun	OXCT1_P55809_OID30227	rs6451582	5	41884903	A	T	0.258482	0.0529879	0.00721609	1.04413e-13	52363
Sun	OXT_P01178_OID21047	rs877172	20	3049890	G	T	0.321331	0.612939	0.00692026	0	52363
Sun	P4HB_P07237_OID21509	rs9675127	17	79785516	G	T	0.195709	0.0874241	0.00773784	6.69246e-30	52363
Sun	PACS2_Q86VP3_OID30186	rs7149013	14	105759840	C	T	0.290612	0.17598	0.00676002	1.06263e-149	52363
Sun	PADI2_Q9Y2J8_OID20467	rs2235910	1	17425829	T	G	0.611514	0.128391	0.00645704	2.80614e-88	52363
Sun	PADI4_Q9UM07_OID20832	rs2240336	1	17674402	T	C	0.421803	-0.253334	0.00618248	0	52363
Sun	PAEP_P09466_OID20925	rs9409964	9	138471928	A	G	0.184432	0.869309	0.00705434	0	52363
Sun	PAFAH2_Q99487_OID31286	rs150853838	1	26303228	A	G	0.00364718	-0.587582	0.0543747	1.60922e-27	52363
Sun	PAG1_Q9NWQ8_OID20108	rs17578845	8	82043998	A	T	0.353957	-0.0715932	0.00650281	1.71803e-28	52363
Sun	PALM_O75781_OID31515	rs12610821	19	719295	G	C	0.0624265	0.306414	0.0123792	1.46327e-135	52363
Sun	PALM2_Q8IXS6_OID31096	rs2795054	9	112544702	T	A	0.754019	-0.220081	0.00694301	8.22193e-221	52363
Sun	PAM_P19021_OID20291	rs149802978	5	102346866	G	C	0.0496915	-1.10347	0.0139518	0	52363
Sun	PAMR1_Q6UXH9_OID21153	rs61736408	11	35456061	C	T	0.158031	-0.481066	0.00807515	0	52363
Sun	PAPPA_Q13219_OID20421	rs117448041	9	118342600	C	T	0.0194109	0.209037	0.021585	1.75694e-22	52363
Sun	PARD3_Q8TEW0_OID31301	rs9418120	10	35060501	A	G	0.273381	0.0718759	0.0069951	4.55878e-25	52363
Sun	PARK7_Q99497_OID21160	rs34157438	1	8023586	T	C	0.166286	0.206164	0.00812277	2.04438e-142	52363
Sun	PARP1_P09874_OID20500	rs1805404	1	226589958	A	G	0.150498	-0.156066	0.00838141	1.0959e-77	52363
Sun	PAXX_Q9BUH6_OID30591	-	9	139896164	G	A	0.687978	-0.165781	0.0066096	3.92374e-139	52363
Sun	PBK_Q96KB5_OID31158	rs7824054	8	27716355	G	C	0.666282	0.0486006	0.00674818	2.96612e-13	52363
Sun	PBLD_P30039_OID20839	rs61854835	10	70038894	G	A	0.246961	0.576259	0.00719723	0	52363
Sun	PBXIP1_Q96AQ6_OID31435	rs35704440	1	154878845	CT	C	0.378393	0.0509609	0.00635605	5.38719e-16	52363
Sun	PCBD1_P61457_OID30610	rs2630336	10	72648422	T	G	0.363661	-0.186106	0.00627745	1.86743e-193	52363
Sun	PCBP2_Q15366_OID31003	rs10876550	12	54712308	A	G	0.572031	0.0483685	0.00621409	3.52219e-15	52363
Sun	PCDH1_Q08174_OID20614	rs1124066	5	141263088	G	A	0.589357	0.0779119	0.00607137	5.37943e-38	52363
Sun	PCDH12_Q9NPG4_OID31045	rs164075	5	141336264	T	G	0.527519	0.32452	0.0061811	0	52363
Sun	PCDH17_O14917_OID20132	rs7333078	13	60033271	G	C	0.389483	0.344676	0.00607737	0	52363
Sun	PCDH7_O60245_OID31456	rs1374657	4	30837143	T	C	0.289907	-0.118399	0.00666051	5.39664e-71	52363
Sun	PCDH9_Q9HC56_OID31516	rs5804316	13	67794402	AT	A	0.887078	-0.335258	0.00948177	3.755e-274	52363
Sun	PCDHB15_Q9Y5E8_OID31377	rs2740584	5	140561768	T	C	0.236756	-0.406133	0.00723595	0	52363
Sun	PCOLCE_Q15113_OID20384	rs4548095	7	100226665	T	C	0.642711	0.169415	0.00999805	1.05116e-64	52363
Sun	PCSK7_Q16549_OID31410	rs171052	11	117081763	G	C	0.248862	-0.374762	0.00726744	0	52363
Sun	PCSK9_Q8NBP7_OID20235	rs11591147	1	55505647	T	G	0.0164514	-1.12113	0.0233527	0	52363
Sun	PCYT2_Q99447_OID31519	rs760092612	17	79931971	C	T	0.000516992	-1.30623	0.163261	6.17717e-16	52363
Sun	PDCD1_Q15116_OID21396	-	2	242801752	C	CG	0.211877	-0.28481	0.007375	0	52363
Sun	PDCD1LG2_Q9BQ51_OID21273	rs2381282	9	5514839	C	T	0.449557	0.580251	0.00587608	0	52363
Sun	PDCD5_O14737_OID21021	rs10402931	19	33072069	A	G	0.694	0.376049	0.00667091	0	52363
Sun	PDCD6_O75340_OID20163	rs9654451	5	299543	T	C	0.12603	-1.5063	0.00931318	0	52363
Sun	PDE5A_O76074_OID30584	rs58583086	4	120556362	G	A	0.622966	-0.158717	0.00634043	1.35293e-138	52363
Sun	PDGFA_P04085_OID20313	rs28391135	7	632194	T	C	0.00367626	-0.58184	0.0511479	2.76485e-30	52363
Sun	PDGFC_Q9NRA1_OID21183	rs2341218	4	157112728	G	A	0.307253	-0.0858988	0.00672994	1.30774e-37	52363
Sun	PDGFRA_P16234_OID20133	rs35597368	4	55139771	C	T	0.114406	-0.425154	0.00936027	0	52363
Sun	PDGFRB_P09619_OID20268	rs2304058	5	149508544	G	C	0.548219	1.1762	0.00618067	0	52363
Sun	PDIA3_P30101_OID30573	-	15	44119313	C	CA	0.276016	-0.0586133	0.0069732	2.13004e-17	52363
Sun	PDIA4_P13667_OID30375	rs11974627	7	148727168	T	G	0.200401	-0.107661	0.00766185	3.7674e-45	52363
Sun	PDIA5_Q14554_OID31209	rs3804749	3	122833003	T	C	0.578913	-0.246739	0.00643128	0	52363
Sun	PDZD2_O15018_OID30151	rs183711	5	31638475	G	T	0.915042	0.420018	0.0111101	0	52363
Sun	PDZK1_Q5T2W1_OID30550	rs1471633	1	145723739	C	A	0.517313	-0.114121	0.00619978	5.74386e-76	52363
Sun	PEAR1_Q5VY43_OID20257	rs4661012	1	156885491	G	T	0.36494	-0.211366	0.00628385	2.46567e-248	52363
Sun	PEBP1_P30086_OID21087	rs1050625	12	118582477	T	C	0.00922968	-0.470642	0.0312951	2.04324e-51	52363
Sun	PECAM1_P16284_OID21131	rs1122800	17	62391365	G	C	0.535747	0.0455788	0.00584816	3.25377e-15	52363
Sun	PECR_Q9BY49_OID30228	rs10197542	2	216903894	C	A	0.111763	-0.447301	0.00992944	0	52363
Sun	PENK_P01210_OID30666	rs2609983	8	57385366	A	G	0.485206	-0.289438	0.00603245	0	52363
Sun	PEPD_P12955_OID30688	rs17569	19	33882222	A	G	0.151774	-0.478386	0.00845017	0	52363
Sun	PER3_P56645_OID30511	rs228648	1	7913430	A	G	0.56186	0.357195	0.00622561	0	52363
Sun	PF4_P02776_OID30764	rs11574452	4	74846661	A	C	0.0460824	-0.186739	0.0148783	1.96018e-36	52363
Sun	PFKFB2_O60825_OID21356	rs1560	1	207250631	G	A	0.475784	-0.186	0.00604848	5.83305e-208	52363
Sun	PGA4_P0DJD7_OID30699	rs4414241	11	60972512	T	C	0.25373	0.0749246	0.00782629	5.1698e-22	52363
Sun	PGD_P52209_OID30344	rs2229688	1	10473200	A	G	0.0193844	0.920065	0.0219541	0	52363
Sun	PGF_P49763_OID20673	-	14	75464458	T	TAA	0.472685	0.149775	0.00539879	1.07823e-169	52363
Sun	PGLYRP1_O75594_OID20338	rs2072563	19	46526648	A	G	0.318952	-0.285453	0.00639759	0	52363
Sun	PGLYRP2_Q96PD5_OID30742	rs34440547	19	15582863	T	C	0.216235	-1.14024	0.00752445	0	52363
Sun	PGLYRP4_Q96LB8_OID30101	rs72708715	1	153317152	C	A	0.0616045	0.915129	0.0130211	0	52363
Sun	PHACTR2_O75167_OID31009	rs9484759	6	143858683	G	A	0.199924	0.246128	0.00761345	1.41159e-229	52363
Sun	PHLDB1_Q86UU1_OID31467	rs633683	11	118504742	C	T	0.593948	-0.0443444	0.00614978	2.78265e-13	52363
Sun	PHYKPL_Q8IUZ5_OID30634	rs142181517	5	177638965	A	T	0.00676092	-2.0349	0.0375712	0	52363
Sun	PI16_Q6UXB8_OID30676	rs62406524	6	36925976	C	G	0.091711	-0.421931	0.0105283	0	52363
Sun	PI3_P19957_OID20326	rs35770435	20	43788804	T	C	0.177024	0.345349	0.00759896	0	52363
Sun	PIBF1_Q8WXW3-4_OID31061	rs2147807	13	73426174	C	T	0.711696	-0.0645067	0.00670238	3.15226e-22	52363
Sun	PIGR_P01833_OID21102	rs291103	1	207107079	A	G	0.0457017	-0.518923	0.0175508	1.99051e-192	52363
Sun	PIK3AP1_Q6ZUJ8_OID20587	rs41317268	10	98469114	G	A	0.191128	-0.229563	0.00763359	5.50578e-199	52363
Sun	PIK3IP1_Q96FE7_OID21094	rs5749246	22	31681062	G	A	0.217686	-0.330403	0.0070497	0	52363
Sun	PILRA_Q9UKJ1_OID21129	rs1859788	7	99971834	G	A	0.686483	0.979239	0.00648824	0	52363
Sun	PILRB_Q9UKJ0_OID20197	rs1859788	7	99971834	G	A	0.686572	1.13366	0.00657197	0	52363
Sun	PINLYP_A6NC86_OID30651	rs3213239	19	44081059	GGGCC	G	0.59358	0.771209	0.00629971	0	52363
Sun	PKD1_P98161_OID30328	-	16	2183806	A	AC	0.00961819	-1.20563	0.0321982	3.7579e-307	52363
Sun	PKD2_Q13563_OID30184	rs2728104	4	88973006	C	T	0.108773	-0.141887	0.00991255	8.96208e-47	52363
Sun	PKLR_P30613_OID20682	rs113312468	1	155390486	C	T	0.0642084	-0.366155	0.0123884	2.7269e-192	52363
Sun	PKN3_Q6P5Z2_OID31311	rs13283282	9	131465481	G	C	0.142682	0.206744	0.00885133	5.79617e-121	52363
Sun	PLA2G10_O15496_OID21002	rs536340612	16	14658120	C	T	0.00399407	-1.36172	0.0474513	2.06674e-181	52363
Sun	PLA2G15_Q8NCC3_OID21473	rs7672	16	68294800	G	C	0.721563	-0.242286	0.00672462	1.43433e-284	52363
Sun	PLA2G1B_P04054_OID20252	rs11065078	12	120748585	T	C	0.215487	-0.0605695	0.0073178	6.31536e-17	52363
Sun	PLA2G2A_P14555_OID20274	rs11573156	1	20306146	C	G	0.221631	0.721038	0.0072442	0	52363
Sun	PLA2G4A_P47712_OID20685	rs12720707	1	186957996	A	G	0.0795711	0.125271	0.0112576	4.5998e-29	52363
Sun	PLA2G7_Q13093_OID21105	rs574476364	6	46685732	T	C	0.00115782	-1.40453	0.0907967	2.81064e-54	52363
Sun	PLAT_P00750_OID20247	rs2020921	8	42044965	A	G	0.0236118	-0.296956	0.0189604	1.37758e-55	52363
Sun	PLAU_P00749_OID21124	rs55744193	10	75672059	A	G	0.00715252	-0.798817	0.0345717	2.01037e-118	52363
Sun	PLAUR_Q03405_OID20764	rs2302524	19	44156472	C	T	0.166683	-0.168501	0.00777465	1.8394e-104	52363
Sun	PLB1_Q6P1J6_OID31110	rs6753929	2	28761981	C	G	0.250921	-0.987262	0.00670003	0	52363
Sun	PLCB2_Q00722_OID31155	rs4924450	15	40597229	A	G	0.708721	-0.151836	0.00670636	8.63428e-114	52363
Sun	PLEKHO1_Q53GL0_OID31088	rs112720009	1	150025177	C	T	0.15695	0.0664441	0.00854051	3.62981e-15	52363
Sun	PLG_P00747_OID30785	rs73015965	6	161127501	G	A	0.00583977	-2.1922	0.0436175	0	52363
Sun	PLIN1_O60240_OID20835	rs150004289	15	90216446	A	G	0.00276886	-0.740884	0.0582708	2.45625e-37	52363
Sun	PLIN3_O60664_OID20143	rs8289	19	4859937	C	T	0.751333	0.0839823	0.00708012	9.35619e-33	52363
Sun	PLSCR3_Q9NRY6_OID31146	rs2277641	17	7297121	A	G	0.0213934	-0.193755	0.0214624	8.77002e-20	52363
Sun	PLTP_P55058_OID20238	rs6073958	20	44551855	C	T	0.20196	-0.501311	0.00737037	0	52363
Sun	PLXDC1_Q8IUK5_OID21258	rs75143957	17	37232605	A	T	0.0437024	-0.561066	0.0152393	4.92695e-297	52363
Sun	PLXDC2_Q6UX71_OID31101	rs4748650	10	20583239	C	A	0.206635	0.0779119	0.00743221	5.17021e-26	52363
Sun	PLXNA4_Q9HCM2_OID20597	rs6467443	7	132238011	T	G	0.211914	0.101672	0.0076261	7.52894e-41	52363
Sun	PLXNB2_O15031_OID20317	rs11547731	22	50722134	C	T	0.654791	-0.704253	0.00621307	0	52363
Sun	PLXNB3_Q9ULL4_OID20160	rs731416	X	153031839	C	T	0.174069	0.159154	0.00710906	2.60568e-111	52363
Sun	PM20D1_Q6GTS8_OID20149	rs112268616	1	205816893	C	T	0.349114	-0.819528	0.00652708	0	52363
Sun	PMM2_O15305_OID30125	rs34258285	16	8906914	C	A	0.0242924	-0.64294	0.0202038	1.56961e-222	52363
Sun	PMS1_P54277_OID30943	rs62184283	2	190665905	A	G	0.198752	0.0563757	0.00789772	4.7272e-13	52363
Sun	PMVK_Q15126_OID20850	rs114951074	1	154903917	T	C	0.00691257	-0.696079	0.0391578	5.39782e-71	52363
Sun	PNLIPRP1_P54315_OID31122	-	10	118361528	A	AT	0.533382	-0.213246	0.00604589	8.10883e-273	52363
Sun	PNLIPRP2_P54317_OID20775	rs4751995	10	118397884	G	A	0.517857	1.13311	0.00617526	0	52363
Sun	PNMA1_Q8ND90_OID30194	-	14	74208345	C	CGCTCCTCTGCAGGCTTCCGCA	0.00624485	-0.523663	0.0400273	2.0689e-39	52363
Sun	PODXL_O00592_OID21358	rs3212298	7	131193739	T	C	0.0449398	-0.555479	0.0143887	0	52363
Sun	PODXL2_Q9NZ53_OID21487	-	3	127348226	T	TGCGGCGCCGCCGGGAGCGCGCGTGTCCCGGCCGGGCC	0.0125771	-1.08845	0.0274218	0	52363
Sun	POF1B_Q8WVV4_OID30504	rs363774	X	84563135	A	T	0.781455	-0.125361	0.00619469	2.31953e-91	52363
Sun	POMC_P01189_OID30282	rs3754861	2	25393722	C	A	0.0798994	0.136212	0.0111607	1.46855e-34	52363
Sun	PON1_P27169_OID30704	rs705379	7	94953895	A	G	0.466135	-0.739277	0.00618228	0	52363
Sun	PON2_Q15165_OID20088	rs3735586	7	95035582	T	A	0.243944	-0.902049	0.00726512	0	52363
Sun	PON3_Q15166_OID20777	rs149867961	7	95025744	C	T	0.0261507	-1.02172	0.0188708	0	52363
Sun	POSTN_Q15063_OID30410	rs9547922	13	38091317	G	A	0.361413	0.244415	0.00636389	0	52363
Sun	PPBP_P02775_OID30761	rs202224981	4	74853229	T	C	0.00147539	-1.13611	0.0790868	4.26837e-47	52363
Sun	PPCDC_Q96CD2_OID21027	rs2304904	15	75315975	A	G	0.0729171	0.647091	0.0117366	0	52363
Sun	PPIE_Q9UNP9_OID31279	rs12086750	1	40210468	C	G	0.366403	-0.0511199	0.00648609	1.61781e-15	52363
Sun	PPL_O60437_OID30564	rs57092250	16	5003700	G	A	0.124203	0.135946	0.00942017	1.64235e-47	52363
Sun	PPM1F_P49593_OID30350	rs5750281	22	22327787	T	C	0.0446797	-0.132063	0.0148094	2.38441e-19	52363
Sun	PPME1_Q9Y570_OID21347	rs77806870	11	74051684	C	T	0.0518632	-0.0975336	0.0134801	2.3212e-13	52363
Sun	PPP1R14A_Q96A00_OID31011	rs71354995	19	38791841	G	A	0.256552	-0.220503	0.0070338	5.01053e-216	52363
Sun	PPP1R14D_Q9NXH3_OID30997	rs11855641	15	41088017	G	A	0.342699	0.0559153	0.00643665	1.86037e-18	52363
Sun	PPP2R5A_Q15172_OID31502	rs75232123	1	212459615	G	C	0.0201237	-0.306174	0.0217615	2.92298e-45	52363
Sun	PRAP1_Q96NZ9_OID30391	rs143674922	10	135161903	A	G	0.0173941	-1.30046	0.0233669	0	52363
Sun	PRCP_P42785_OID20337	rs536130717	11	82741319	A	G	0.0018709	-1.60028	0.0669215	1.12726e-126	52363
Sun	PRDX1_Q06830_OID20962	rs487174	1	46009536	G	A	0.90279	0.102404	0.0104062	3.76034e-23	52363
Sun	PRDX2_P32119_OID30668	-	19	12911252	C	CA	0.0127642	-0.952507	0.027651	2.45667e-260	52363
Sun	PRDX3_P30048_OID20483	rs747334131	10	120953662	T	TCTGTCAC	0.32725	-0.06471	0.00667528	1.59916e-22	52363
Sun	PRDX5_P30044_OID20644	rs61734554	11	64001633	A	G	0.00519873	0.975221	0.0426823	7.58468e-116	52363
Sun	PRDX6_P30041_OID21404	rs7524592	1	173466057	G	T	0.188681	0.168899	0.00774889	1.25113e-105	52363
Sun	PRELP_P51888_OID20766	rs41313926	1	203452409	A	G	0.0107385	-2.25612	0.0281612	0	52363
Sun	PRG2_P13727_OID30381	rs3741085	11	57166969	T	C	0.117957	0.15012	0.00894922	1.8704e-63	52363
Sun	PRG3_Q9Y2Y8_OID30383	rs669661	11	57148175	G	A	0.99511	0.969022	0.043738	4.65238e-109	52363
Sun	PRKAB1_Q9Y478_OID20444	rs749140768	12	120109284	A	AGGCACCTCTTCACAGGAC	0.0773267	0.338243	0.0116825	1.28762e-184	52363
Sun	PRKAR2A_P13861_OID31119	rs2230509	3	48802465	C	T	0.00182871	-1.33607	0.0705096	2.26025e-80	52363
Sun	PRKG1_Q13976_OID30621	rs1937682	10	53678982	T	A	0.236735	-0.21418	0.00722598	2.26348e-193	52363
Sun	PRND_Q9UKY0_OID31124	rs36029876	20	4723988	A	C	0.103173	-0.360608	0.00992867	3.92971e-289	52363
Sun	PROC_P04070_OID20402	rs1799809	2	128175875	A	G	0.563924	0.192655	0.00577049	1.08553e-244	52363
Sun	PROCR_Q9UNN8_OID30149	rs11907011	20	33767770	T	C	0.0888486	0.713349	0.0110996	0	52363
Sun	PROK1_P58294_OID20543	rs1857513	1	110993457	A	G	0.164226	0.493029	0.00621172	0	52363
Sun	PROS1_P07225_OID30737	rs528128538	3	93587539	T	C	0.0026714	-0.979726	0.0584168	1.97859e-63	52363
Sun	PRR4_Q16378_OID30607	rs1063193	12	10999780	T	C	0.558571	-0.771403	0.00620784	0	52363
Sun	PRRT3_Q5FWE3_OID30276	rs3846167	3	9996426	C	T	0.259638	-0.210997	0.00690239	1.59623e-205	52363
Sun	PRSS2_P07478_OID20364	rs3752404	7	142470574	G	A	0.417453	-0.137314	0.00614062	4.65721e-111	52363
Sun	PRSS22_Q9GZN4_OID30483	rs8046218	16	2908703	T	C	0.328292	0.24818	0.00662973	5.38723e-307	52363
Sun	PRSS27_Q9BQR3_OID20212	rs71386687	16	2767894	T	G	0.0783233	0.371239	0.0108354	1.46114e-257	52363
Sun	PRSS53_Q2L4Q9_OID31093	rs7199949	16	31096164	C	G	0.395991	0.848017	0.00611953	0	52363
Sun	PRSS8_Q16651_OID20763	rs59735493	16	31133100	A	G	0.298888	0.111969	0.00620337	3.96564e-73	52363
Sun	PRTFDC1_Q9NRG1_OID20867	rs143356584	10	25241502	T	C	0.0128311	-0.837264	0.0275743	8.22767e-203	52363
Sun	PRTG_Q2VWP7_OID21443	rs10851591	15	56003705	G	A	0.67695	0.432841	0.00646786	0	52363
Sun	PRTN3_P24158_OID20329	rs10425544	19	836043	C	T	0.719408	0.497457	0.00729057	0	52363
Sun	PSAP_P07602_OID30419	rs9415044	10	73539586	T	G	0.530146	-0.190808	0.00595786	2.3499e-225	52363
Sun	PSAPL1_Q6NUJ1_OID31473	rs61318481	4	7433863	G	C	0.17798	0.616582	0.00769713	0	52363
Sun	PSCA_O43653_OID31493	rs2976388	8	143760256	A	G	0.414607	1.16316	0.00626483	0	52363
Sun	PSG1_P11464_OID20916	rs12986075	19	43373034	A	G	0.190288	-0.962034	0.00773224	0	52363
Sun	PSMD5_Q16401_OID30918	rs35310240	9	123516414	CT	C	0.568171	-0.0504	0.0064474	2.70261e-15	52363
Sun	PSMD9_O00233_OID21304	rs1720066	12	122363982	A	C	0.292381	-0.199461	0.00653598	7.66243e-205	52363
Sun	PSME1_Q06323_OID20969	rs2236352	14	24610733	C	T	0.267274	0.100192	0.00686719	1.62704e-48	52363
Sun	PSME2_Q9UL46_OID20989	rs2236352	14	24610733	C	T	0.267211	0.110602	0.0067997	8.64152e-60	52363
Sun	PSMG3_Q9BT73_OID20549	rs34407549	7	1608812	G	C	0.00808874	-0.283344	0.034596	1.30527e-16	52363
Sun	PSMG4_Q5JS54_OID30514	rs4959788	6	3264526	T	C	0.803234	-0.178825	0.00790015	9.6606e-114	52363
Sun	PSRC1_Q6PGN9_OID21169	rs34863121	1	109823458	T	C	0.0119595	0.733901	0.0284117	1.99212e-147	52363
Sun	PSTPIP2_Q9H939_OID30596	rs72642434	18	43572677	A	T	0.141345	-0.221789	0.00911299	3.91478e-131	52363
Sun	PTGDS_P41222_OID20408	-	9	139855868	A	ACAGGGCTGCGAGGGGACTGCCTG	0.511656	0.188576	0.005831	9.51119e-230	52363
Sun	PTGES2_Q9H7Z7_OID30561	rs55965570	9	130841000	A	G	0.199819	-0.0942691	0.00778307	4.55812e-34	52363
Sun	PTGR1_Q14914_OID30297	rs7871740	9	114328473	A	C	0.0533061	0.754913	0.0133841	0	52363
Sun	PTH1R_Q03431_OID20571	rs121434601	3	46939587	T	C	0.0025711	2.30554	0.0606499	0	52363
Sun	PTK7_Q13308_OID20880	rs542928442	6	43035677	T	C	0.000613923	2.52781	0.135827	1.32041e-77	52363
Sun	PTN_P21246_OID20083	rs1431092	7	137016309	A	T	0.42194	0.142476	0.00598121	1.02168e-125	52363
Sun	PTPRB_P23467_OID30324	rs2465811	12	70990054	C	T	0.29136	-0.353584	0.0064301	0	52363
Sun	PTPRC_P08575_OID30380	rs552839429	1	198695989	C	T	0.016062	-0.737156	0.0238363	2.69012e-210	52363
Sun	PTPRF_P10586_OID20310	rs12076635	1	44026656	C	G	0.764805	0.0937249	0.00692681	5.14873e-42	52363
Sun	PTPRH_Q9HD43_OID31433	rs11394932	19	55703237	CG	C	0.141684	0.901083	0.00870159	0	52363
Sun	PTPRK_Q15262_OID31461	rs11422080	6	128383562	GA	G	0.840899	-0.120163	0.00849514	1.00385e-45	52363
Sun	PTPRM_P28827_OID20598	rs72911294	18	8253602	T	C	0.260086	-0.0834691	0.00634284	7.49601e-40	52363
Sun	PTPRN2_Q92932_OID20912	rs11761540	7	157907394	T	C	0.34949	-0.153752	0.00637337	6.97837e-129	52363
Sun	PTPRR_Q15256_OID31099	rs144705265	12	71158453	A	G	0.00503012	-1.15093	0.0423987	1.43434e-162	52363
Sun	PTPRS_Q13332_OID20306	rs55763631	19	5293583	A	C	0.0464049	0.652645	0.0153433	0	52363
Sun	PTPRZ1_P23471_OID30343	rs772220206	7	121502883	A	AC	0.336784	-0.182869	0.00583938	1.3907e-215	52363
Sun	PTRHD1_Q6GMV3_OID30659	rs187799267	2	25017733	G	C	0.000975883	-1.32552	0.0988602	2.71325e-41	52363
Sun	PTS_Q03393_OID20847	-	11	112065743	C	CTATCT	0.241656	-0.231723	0.00717376	3.33498e-229	52363
Sun	PTX3_P26022_OID20570	rs57861002	3	157163948	C	T	0.00306142	-0.876738	0.0607392	1.57031e-47	52363
Sun	PVALB_P20472_OID21420	rs4821544	22	37258503	C	T	0.31276	-0.81596	0.00666226	0	52363
Sun	PVR_P15151_OID21011	rs2301274	19	45146402	C	T	0.25212	-0.783123	0.00712373	0	52363
Sun	PXDNL_A1KZ92_OID31405	rs6473600	8	52366217	A	G	0.128837	-0.344539	0.00927222	1.61601e-302	52363
Sun	PXN_P49023_OID20822	rs4767884	12	120661977	C	T	0.776575	0.768777	0.00735735	0	52363
Sun	PYDC1_Q8WXC3_OID30202	rs8062426	16	31263553	A	G	0.670436	0.302411	0.00577809	0	52363
Sun	PYY_P10082_OID30150	rs111218914	17	42053395	C	T	0.665024	0.242345	0.00654815	3.99927e-300	52363
Sun	PZP_P20742_OID30730	rs1017301	12	9362931	A	C	0.674698	0.328099	0.0048541	0	52363
Sun	QDPR_P09417_OID20174	-	4	17513757	C	CG	0.244387	-0.456835	0.00715235	0	52363
Sun	QPCT_Q16769_OID20320	rs2255991	2	37579971	T	C	0.00963497	-1.63908	0.0320295	0	52363
Sun	QSOX1_O00391_OID30729	rs12371	1	180163390	G	A	0.0853073	-1.07617	0.0110358	0	52363
Sun	RAB11FIP3_O75154_OID30325	rs9921779	16	548573	G	C	0.0338495	-0.154946	0.0167631	1.19529e-20	52363
Sun	RAB2B_Q8WUD1_OID31362	rs34855848	14	21929718	CA	C	0.141124	-0.229797	0.00884705	4.81811e-149	52363
Sun	RAB33A_Q14088_OID30122	rs143672509	X	129307696	T	C	0.00162724	-0.659956	0.0677841	1.05709e-22	52363
Sun	RAB44_Q7Z6P3_OID31346	rs143756287	6	36694800	ACTCCTGACCGCAAGTGATC	A	0.263797	-0.144035	0.00710347	1.03245e-91	52363
Sun	RAB6A_P20340_OID20608	rs35939600	11	73551143	T	TA	0.146624	0.0710901	0.00834864	8.31721e-18	52363
Sun	RABEP1_Q15276_OID30647	rs762929269	17	5189163	T	TATC	0.496368	0.0767919	0.00609407	1.04129e-36	52363
Sun	RABEPK_Q7Z6M1_OID21163	rs113258444	9	127964259	G	A	0.145658	0.207829	0.00890015	6.70325e-121	52363
Sun	RABGAP1L_Q5R372_OID20447	rs2901785	1	174104743	A	G	0.460696	0.0619579	0.00615176	3.68942e-24	52363
Sun	RAD23B_P54727_OID21166	rs1805335	9	110081018	G	A	0.546944	-0.0567731	0.00622333	3.66635e-20	52363
Sun	RALB_P11234_OID30567	rs148102406	2	121035039	TGTGA	T	0.681813	-0.118569	0.00678481	1.09804e-68	52363
Sun	RALY_Q9UKM9_OID31382	-	20	32563820	G	GTATATA	0.599623	0.0733067	0.00634027	3.20686e-31	52363
Sun	RANBP1_P43487_OID30258	rs117718692	22	20117344	T	G	0.0531359	0.122122	0.0136705	2.06836e-19	52363
Sun	RARRES1_P49788_OID21177	rs6441224	3	158450417	C	T	0.535257	0.446737	0.00627574	0	52363
Sun	RARRES2_Q99969_OID20373	rs3735169	7	150034378	G	A	0.251007	0.217323	0.00688622	6.72279e-219	52363
Sun	RASSF2_P50749_OID21194	rs1104902	20	4804131	A	C	0.564621	0.0970869	0.00621758	2.8817e-55	52363
Sun	RBKS_Q9H477_OID20986	rs140948699	2	28081439	G	C	0.00886927	-1.78976	0.0316285	0	52363
Sun	RBM17_Q96I25_OID31034	rs11256771	10	6146262	T	C	0.0369058	-0.365908	0.0162813	3.71757e-112	52363
Sun	RBP1_P09455_OID30913	rs2071387	3	139257603	G	A	0.190098	0.121375	0.0080107	3.69667e-52	52363
Sun	RBP2_P50120_OID21365	rs2083336	3	139201272	G	T	0.411303	-0.0689811	0.00624212	1.08503e-28	52363
Sun	RBP5_P82980_OID21369	rs76904513	12	7278118	G	A	0.0891079	-0.499077	0.0103812	0	52363
Sun	RBP7_Q96R05_OID31526	rs1220399	1	9995254	A	G	0.760559	0.293531	0.0070879	0	52363
Sun	RBPMS2_Q6ZRY4_OID30257	rs11634545	15	65087899	C	G	0.937359	-0.168108	0.0130464	2.71986e-38	52363
Sun	RECK_O95980_OID30234	rs71521299	9	36058816	G	T	0.0155633	-0.858613	0.0241794	1.71636e-276	52363
Sun	REEP4_Q9H6H4_OID31028	rs117291678	8	21993410	C	G	0.0174941	-0.596922	0.0231403	4.94475e-147	52363
Sun	REG1A_P05451_OID20415	rs11126696	2	79323888	G	A	0.613313	0.244314	0.00608377	0	52363
Sun	REG1B_P48304_OID20266	rs11126696	2	79323888	G	A	0.613753	0.338391	0.0061031	0	52363
Sun	REG3A_Q06141_OID20258	rs147616162	2	79395511	A	T	0.0563817	0.39639	0.0126237	9.97135e-217	52363
Sun	REG3G_Q6UW15_OID31408	-	2	79251975	A	ATCC	0.202823	0.31024	0.00774054	0	52363
Sun	REG4_Q9BYZ8_OID20784	rs79795228	1	120359286	A	C	0.0167346	0.608763	0.0227811	1.2967e-157	52363
Sun	RELT_Q969Z4_OID21142	rs56801796	11	73090265	G	A	0.215993	0.368634	0.00679098	0	52363
Sun	REN_P00797_OID20201	rs193280350	1	204148649	A	G	0.00762883	0.834515	0.034705	4.60065e-128	52363
Sun	RET_P07949_OID21346	rs1852959	10	43359636	C	T	0.170415	0.454887	0.00794931	0	52363
Sun	RETN_Q9HD89_OID20327	rs3219175	19	7733855	A	G	0.0117649	1.40751	0.031227	0	52363
Sun	RGMA_Q96B86_OID21065	rs3752102	15	93616014	A	C	0.465315	-0.222923	0.00594014	0	52363
Sun	RGMB_Q6NW40_OID21045	rs56870134	5	97773523	T	C	0.556747	0.170754	0.00606188	7.1143e-175	52363
Sun	RHOC_P08134_OID20950	rs1006298	1	113061959	C	G	0.481316	0.0760496	0.00619485	6.07415e-35	52363
Sun	RIDA_P52758_OID30635	rs77539382	8	99120794	TC	T	0.310313	-0.315479	0.00653488	0	52363
Sun	RILP_Q96NA2_OID21436	rs34982553	17	1551231	T	C	0.00618245	0.518197	0.047851	1.24911e-27	52363
Sun	RILPL2_Q969X0_OID30342	rs186269301	12	123917276	A	G	0.0269574	0.227962	0.0187511	2.62449e-34	52363
Sun	RLN2_P04090_OID30601	rs4742081	9	5334933	G	C	0.230891	0.158992	0.0072684	2.27655e-106	52363
Sun	RNASE1_P07998_OID30672	rs17254387	14	21280678	A	G	0.691445	0.205754	0.00639287	1.43466e-227	52363
Sun	RNASE10_Q5GAN6_OID30238	rs7144945	14	20971442	T	C	0.518012	-0.780443	0.00623326	0	52363
Sun	RNASE3_P12724_OID20203	rs147307766	14	21385991	T	C	0.0517759	0.545483	0.0138088	0	52363
Sun	RNASE4_P34096_OID30705	rs1888560	14	21164245	T	C	0.317503	-0.303824	0.00644556	0	52363
Sun	RNASE6_Q93091_OID30689	rs1045922	14	21250124	A	G	0.237168	-0.426928	0.00681591	0	52363
Sun	RNASEH2A_O75792_OID31027	rs115191768	19	12920572	A	T	0.0359128	-0.293554	0.0165354	8.16022e-71	52363
Sun	RNASET2_O00584_OID20321	rs3756838	6	167371251	A	G	0.218236	0.449359	0.00713373	0	52363
Sun	RNF149_Q8NC42_OID30235	rs12621632	2	101897325	T	C	0.403776	0.264121	0.00611137	0	52363
Sun	RNF43_Q68DV7_OID31291	rs34523089	17	56436109	T	C	0.152004	0.149482	0.00869544	1.55471e-66	52363
Sun	ROBO1_Q9Y6N7_OID20734	rs3773244	3	78784770	A	G	0.193937	0.237563	0.00760815	2.45423e-214	52363
Sun	ROBO2_Q9HCK4_OID21007	rs775722	3	77643616	C	T	0.447736	-0.0985093	0.00584196	4.25523e-64	52363
Sun	ROBO4_Q8WZ75_OID30226	rs59648931	11	124767067	C	T	0.245921	-0.10915	0.00697119	1.48108e-55	52363
Sun	ROR1_Q01973_OID20224	rs4915946	1	64609035	G	C	0.179625	-0.359255	0.00779893	0	52363
Sun	RP2_O75695_OID21302	rs1805147	X	46719498	T	C	0.03145	-0.655617	0.0146706	0	52363
Sun	RPA2_P15927_OID30453	rs17185052	1	28241083	A	G	0.0651039	0.210148	0.0127629	3.24422e-61	52363
Sun	RPE_Q96AT9_OID31324	rs7585265	2	210885022	T	C	0.345196	-0.0543386	0.00648563	2.68472e-17	52363
Sun	RPL14_P50914_OID30284	rs41485644	3	40500051	A	G	0.0447609	-0.135451	0.0150761	1.29974e-19	52363
Sun	RRM2_P31350_OID21187	rs6737932	2	10264293	C	T	0.739479	-0.0545877	0.00721198	1.88009e-14	52363
Sun	RRM2B_Q7LG56_OID21174	rs5893603	8	103250839	CG	C	0.0777032	0.197452	0.0116485	9.48424e-65	52363
Sun	RSPO1_Q2MKA7_OID20938	rs36043533	1	38079517	G	T	0.056565	0.468495	0.0129294	8.60414e-288	52363
Sun	RSPO3_Q9BXY4_OID21415	rs1936801	6	127436313	G	A	0.523551	0.152056	0.00561117	5.08549e-162	52363
Sun	RTBDN_Q9BSG5_OID21343	rs8109193	19	12931365	G	T	0.275795	-0.169784	0.00677226	5.21699e-139	52363
Sun	RTN4IP1_Q8WWV3_OID31030	rs2054365	6	107077502	A	G	0.395777	0.0957848	0.00623833	1.65894e-53	52363
Sun	RTN4R_Q9BZR6_OID21424	rs75765	22	20174959	T	C	0.736141	-0.29096	0.00686548	0	52363
Sun	RWDD1_Q9H446_OID21015	rs147899431	6	116892681	C	G	0.0426574	0.272516	0.0150563	1.59917e-73	52363
Sun	S100A11_P31949_OID20130	rs3007678	1	152012517	C	G	0.0471045	0.310151	0.0140783	7.35851e-108	52363
Sun	S100A12_P80511_OID21374	rs3014874	1	153337943	A	G	0.259937	-0.23507	0.0068633	2.15929e-257	52363
Sun	S100A13_Q99584_OID30529	rs114678888	1	153595448	A	C	0.038345	-0.473892	0.0157327	1.26843e-199	52363
Sun	S100A14_Q9HCY8_OID30987	rs11548102	1	153587256	T	A	0.479427	-0.175767	0.0061393	1.42999e-180	52363
Sun	S100A16_Q96FQ6_OID20878	rs11548102	1	153587256	T	A	0.479325	-0.102356	0.00634506	7.64964e-59	52363
Sun	S100A3_P33764_OID31352	-	1	153520255	A	AC	0.00603327	-0.508817	0.0398004	1.00436e-37	52363
Sun	S100A4_P26447_OID21519	rs41265164	1	153520203	A	G	0.0618087	0.372627	0.0130391	6.36703e-180	52363
Sun	S100G_P29377_OID31051	rs59699597	X	16493695	T	C	0.282945	-0.15034	0.00565292	3.86669e-156	52363
Sun	S100P_P25815_OID20103	-	4	6686949	T	TG	0.0607751	-0.51907	0.012994	0	52363
Sun	SAA4_P35542_OID30726	rs111925329	11	18243922	A	C	0.963348	-1.00652	0.0171035	0	52363
Sun	SAMD9L_Q8IVG5_OID20536	rs17165120	7	92777091	C	A	0.0706602	-0.531214	0.0119164	0	52363
Sun	SARG_Q9BW04_OID30331	rs74441312	1	207205404	G	T	0.0172626	0.236967	0.0239097	1.86607e-23	52363
Sun	SAT2_Q96F10_OID31306	rs13894	17	7529902	A	G	0.0738321	-1.02388	0.0118491	0	52363
Sun	SBSN_Q6UWP8_OID30398	-	19	36021687	T	TTTTA	0.247652	0.580307	0.0070775	0	52363
Sun	SCAMP3_O14828_OID21332	rs1142287	1	155230131	T	C	0.267453	-0.0795677	0.0069434	1.05398e-30	52363
Sun	SCARA5_Q6ZMJ2_OID21058	rs2685417	8	27807434	C	G	0.262308	-0.326901	0.00648575	0	52363
Sun	SCARB2_Q14108_OID20943	rs28563976	4	77097373	C	A	0.14311	-0.309939	0.00817181	0	52363
Sun	SCARF1_Q14162_OID20297	rs2272011	17	1542190	A	G	0.594641	-0.381357	0.00619872	0	52363
Sun	SCARF2_Q96GP6_OID21048	rs9610447	22	20768891	T	C	0.754288	0.323259	0.006189	0	52363
Sun	SCG3_Q8WXD2_OID20728	rs2606145	15	51980311	A	G	0.762146	0.700482	0.00709785	0	52363
Sun	SCGB1A1_P11684_OID20688	rs3741240	11	62186542	A	G	0.347788	-0.33612	0.00612629	0	52363
Sun	SCGB3A1_Q96QR1_OID30577	rs307802	5	180019237	C	T	0.399788	0.122793	0.00602816	1.54663e-92	52363
Sun	SCGB3A2_Q96PL1_OID20723	rs10463391	5	147213549	T	G	0.201994	-0.24455	0.00753489	2.25178e-231	52363
Sun	SCLY_Q96I15_OID21425	rs62196005	2	239007130	T	A	0.287253	0.201323	0.00657033	1.7292e-206	52363
Sun	SCN4B_Q8IWT1_OID30277	rs35632913	11	118013263	GT	G	0.642189	-0.630914	0.00641435	0	52363
Sun	SCP2_P22307_OID21161	rs1242331	1	53392908	G	A	0.662164	0.0475296	0.00667516	5.38194e-13	52363
Sun	SCPEP1_Q9HB40_OID30278	rs34449028	17	55085363	T	A	0.300642	-0.359265	0.00693051	0	52363
Sun	SCRG1_O75711_OID30333	-	4	174310687	A	AAAAC	0.381564	0.116002	0.00576613	2.57589e-90	52363
Sun	SCRN1_Q12765_OID20542	rs17324153	7	29966141	C	T	0.0405488	0.247267	0.0155368	2.49636e-57	52363
Sun	SCT_P09683_OID30951	rs117230113	11	440601	T	C	0.0162807	-0.166329	0.0245547	6.27149e-12	52363
Sun	SDC1_P18827_OID20169	rs907866	2	20371380	A	G	0.449388	0.131262	0.00597865	3.86853e-107	52363
Sun	SDC4_P31431_OID20216	rs2741454	20	43974319	T	C	0.492338	-0.2259	0.00607016	1.96396e-303	52363
Sun	SDCCAG8_Q86SQ7_OID31423	rs953492	1	243471192	G	A	0.526165	0.199683	0.00604202	8.02723e-240	52363
Sun	SDHB_P21912_OID31436	rs1497406	1	16505320	G	A	0.564578	0.0602498	0.00622666	1.90482e-22	52363
Sun	SDK2_Q58EX2_OID30662	rs11655934	17	71587577	A	G	0.146209	-0.66233	0.00882322	0	52363
Sun	SEC31A_O94979_OID30269	rs11541628	4	83765605	A	C	0.0242455	-0.318006	0.0201009	1.12376e-56	52363
Sun	SEL1L_Q9UBV2_OID30196	rs11499034	14	81972441	C	T	0.0139629	-1.21567	0.0260994	0	52363
Sun	SELE_P16581_OID20290	rs7515714	1	169707729	G	A	0.666112	-0.0972564	0.00539207	4.99703e-73	52363
Sun	SELENOP_P49908_OID30745	rs230808	5	42793853	A	G	0.26018	-0.111318	0.00698973	2.09347e-57	52363
Sun	SELL_P14151_OID30752	rs2223286	1	169665632	C	T	0.319473	-0.407092	0.00637152	0	52363
Sun	SELP_P16109_OID20379	rs6136	1	169563951	G	T	0.107715	-0.413289	0.00979465	0	52363
Sun	SELPLG_Q14242_OID20560	rs74792300	12	109017454	C	T	0.0241174	-1.79327	0.0205836	0	52363
Sun	SEMA3F_Q13275_OID20186	rs74461473	3	50250747	T	C	0.108159	-0.201239	0.00966223	1.2222e-96	52363
Sun	SEMA4C_Q9C0C4_OID21329	rs756513821	2	96219017	G	A	0.00102235	-0.938307	0.105991	4.27118e-19	52363
Sun	SEMA4D_Q92854_OID21020	rs34544762	9	92106813	T	C	0.2481	0.0922917	0.00713798	1.53072e-38	52363
Sun	SEMA6C_Q9H3T2_OID30531	rs11204771	1	151054180	A	G	0.770506	0.102096	0.00751276	2.30548e-42	52363
Sun	SEMA7A_O75326_OID20283	rs78994380	15	74692412	A	C	0.107351	-0.227578	0.00984302	1.43187e-118	52363
Sun	SEPTIN8_Q92599_OID31079	rs30514	5	132114847	T	C	0.13905	-0.147097	0.0089967	2.17111e-60	52363
Sun	SEPTIN9_Q9UHD8_OID21279	rs72896180	17	75451737	T	C	0.0153783	-0.365507	0.0252017	5.77586e-48	52363
Sun	SERPINA1_P01009_OID30750	rs17580	14	94847262	A	T	0.0456309	-0.371386	0.0149322	7.57221e-137	52363
Sun	SERPINA11_Q86U17_OID20281	rs12888805	14	94912799	A	G	0.401127	-0.625252	0.00560372	0	52363
Sun	SERPINA12_Q8IW75_OID20219	rs4900235	14	94988702	T	C	0.219335	0.75165	0.0073342	0	52363
Sun	SERPINA3_P01011_OID30786	rs61976127	14	95097666	G	A	0.177344	-0.444661	0.00816933	0	52363
Sun	SERPINA4_P29622_OID30774	rs5511	14	95033595	T	A	0.225629	0.611695	0.00729244	0	52363
Sun	SERPINA5_P05154_OID30763	rs1130267	14	95063107	A	G	0.583503	0.199143	0.00617404	1.50196e-228	52363
Sun	SERPINA6_P08185_OID30743	-	14	94829160	G	GCA	0.507259	-0.207445	0.00559287	1.96378e-301	52363
Sun	SERPINA7_P05543_OID30724	rs1804495	X	105278361	A	C	0.123779	-0.520119	0.00761618	0	52363
Sun	SERPINA9_Q86WD7_OID21284	rs11850199	14	94942663	A	C	0.268632	-0.494869	0.00693586	0	52363
Sun	SERPINB1_P30740_OID21088	rs2293772	6	2835831	G	A	0.585275	0.088145	0.00623303	1.05226e-45	52363
Sun	SERPINB5_P36952_OID20064	rs1840557	18	61170467	A	G	0.624316	0.0598959	0.0065277	2.24426e-20	52363
Sun	SERPINB6_P35237_OID21023	rs9405601	6	2972897	A	G	0.439772	0.159221	0.00614574	2.73832e-148	52363
Sun	SERPINB8_P50452_OID20630	rs3826616	18	61654463	G	A	0.577909	-0.726838	0.0061289	0	52363
Sun	SERPINB9_P50453_OID20932	rs7751676	6	2931879	T	C	0.0655192	0.187959	0.0124217	5.01876e-52	52363
Sun	SERPINC1_P01008_OID30789	rs2227624	1	173884010	T	A	0.0032477	-0.836867	0.052377	9.12989e-58	52363
Sun	SERPIND1_P05546_OID30767	rs117254553	22	21029718	T	G	0.00269682	-0.807124	0.0619245	3.91934e-39	52363
Sun	SERPINE1_P05121_OID20342	rs2227674	7	100776208	G	A	0.210242	-0.10871	0.00744994	1.57753e-48	52363
Sun	SERPINE2_P07093_OID30359	rs68066031	2	224880498	C	T	0.221785	-0.629764	0.00742976	0	52363
Sun	SERPINF1_P36955_OID30757	rs58697961	17	1665424	A	G	0.352257	-0.283102	0.00627517	0	52363
Sun	SERPINF2_P08697_OID30779	rs11078597	17	1618363	C	T	0.192308	-0.213118	0.00758039	3.26746e-174	52363
Sun	SERPING1_P05155_OID30777	rs28362944	11	57365723	C	T	0.0471014	-0.436742	0.0139513	2.01031e-215	52363
Sun	SERPINH1_P50454_OID31322	rs599816	11	75293982	A	G	0.551031	0.129775	0.00629524	1.01116e-94	52363
Sun	SERPINI1_Q99574_OID30604	rs2055026	3	167462868	G	T	0.230337	0.454066	0.00718295	0	52363
Sun	SERPINI2_O75830_OID31504	rs12495408	3	167168851	A	G	0.129296	0.498622	0.00792717	0	52363
Sun	SESTD1_Q86VW0_OID20790	rs10170520	2	180094613	T	A	0.348496	-0.103266	0.00656714	5.12552e-56	52363
Sun	SETMAR_Q53H47_OID20948	rs11915920	3	4410534	T	C	0.485427	-0.217211	0.00592647	2.2063e-294	52363
Sun	SEZ6_Q53EL9_OID30968	rs12941884	17	27284443	G	A	0.1331	-0.0859259	0.00911564	2.12596e-21	52363
Sun	SEZ6L_Q9BYH1_OID21488	rs137203	22	26688831	T	G	0.0257768	-0.556308	0.0189118	1.71834e-190	52363
Sun	SEZ6L2_Q6UXD5_OID21289	rs11344	16	29910518	G	C	0.350562	0.150116	0.00584389	8.02376e-146	52363
Sun	SF3B4_Q15427_OID21278	rs16836630	1	149898951	C	G	0.0792852	-0.0916136	0.0113825	4.18609e-16	52363
Sun	SFRP1_Q8N474_OID20984	rs72643819	8	41167193	T	G	0.377714	-0.188144	0.00613069	4.00517e-207	52363
Sun	SFRP4_Q6FHJ7_OID30648	rs75207237	7	37972390	A	T	0.122457	0.279662	0.00922933	5.48655e-202	52363
Sun	SFTPA1_Q8IWL2_OID21165	rs1965708	10	81317045	T	G	0.198395	-0.274007	0.00786675	4.12499e-266	52363
Sun	SFTPA2_Q8IWL1_OID21218	rs17886395	10	81318663	G	C	0.13649	0.914401	0.00905558	0	52363
Sun	SFTPD_P35247_OID20214	rs721917	10	81706324	G	A	0.42599	-0.754545	0.00589428	0	52363
Sun	SGSH_P51688_OID30341	rs7503034	17	78184393	T	C	0.330755	-0.887162	0.00599916	0	52363
Sun	SH2B3_Q9UQQ2_OID21222	rs10849949	12	111893537	G	A	0.23171	-0.0824049	0.00747898	1.5612e-28	52363
Sun	SH2D1A_O60880_OID20514	rs12164382	X	123480147	T	C	0.420396	0.252865	0.00519297	0	52363
Sun	SH3BP1_Q9Y3L3_OID31439	rs12710562	22	38029723	G	A	0.196353	0.280655	0.00792929	1.02933e-274	52363
Sun	SH3GLB2_Q9NR46_OID31145	rs17455517	9	131785369	T	G	0.457972	-0.266082	0.00605436	0	52363
Sun	SHBG_P04278_OID30685	rs727428	17	7537792	C	T	0.554068	0.272343	0.00560308	0	52363
Sun	SHH_Q15465_OID30516	rs10225292	7	156173238	C	T	0.378961	-0.055224	0.00652754	1.33511e-17	52363
Sun	SHISA5_Q8N114_OID30387	rs7434077	3	48541016	C	A	0.0711462	-0.23741	0.0117484	4.17467e-91	52363
Sun	SHMT1_P34896_OID20714	rs669340	17	18263957	C	G	0.633908	0.726982	0.00636551	0	52363
Sun	SHPK_Q9UHJ6_OID31292	rs222780	17	3519647	A	G	0.102253	-0.118716	0.0103445	8.68316e-31	52363
Sun	SIAE_Q9HAT2_OID21503	rs78778622	11	124530664	C	T	0.0555545	-0.428543	0.0132873	1.645e-228	52363
Sun	SIGLEC1_Q9BZZ2_OID20690	rs189448562	20	3705115	C	G	0.0109016	-1.83799	0.0289351	0	52363
Sun	SIGLEC10_Q96LC7_OID20537	rs148783636	19	51910979	C	T	0.0191088	-1.51788	0.0235709	0	52363
Sun	SIGLEC5_O15389_OID21082	rs1106476	19	52130637	A	T	0.112316	-1.1693	0.00972151	0	52363
Sun	SIGLEC6_O43699_OID21394	rs62617068	19	52034549	A	C	0.0119652	-1.77024	0.0275828	0	52363
Sun	SIGLEC7_Q9Y286_OID20190	rs140185670	19	51646140	C	G	0.0658292	-0.6181	0.0125153	0	52363
Sun	SIGLEC8_Q9NYZ4_OID30261	rs36518	19	51942903	A	G	0.137674	0.649675	0.00857945	0	52363
Sun	SIGLEC9_Q9Y336_OID21390	rs2673908	19	51627766	G	T	0.565825	-0.565245	0.00546051	0	52363
Sun	SIL1_Q9H173_OID30207	rs11957633	5	138364394	C	T	0.323428	0.0602913	0.00668743	9.78837e-20	52363
Sun	SIRPA_P78324_OID20304	rs146490405	20	1895797	A	G	0.37891	-1.23358	0.00637252	0	52363
Sun	SIRPB1_O00241_OID20739	rs79462675	20	1597175	A	C	0.128514	-0.943899	0.00898164	0	52363
Sun	SIRT2_Q8IXJ6_OID21375	rs144373891	19	39379770	T	C	0.00900963	-0.698042	0.0323518	1.4898e-103	52363
Sun	SKAP1_Q86WV1_OID20906	rs16956892	17	46523919	G	C	0.278159	0.052498	0.00679904	5.75366e-15	52363
Sun	SLA2_Q9H6Q3_OID31017	rs113102870	20	35242796	A	G	0.00641914	-0.737687	0.0386965	2.54281e-81	52363
Sun	SLAMF1_Q13291_OID20496	rs7550771	1	160582724	T	G	0.323263	0.0965814	0.00661033	1.20059e-48	52363
Sun	SLAMF6_Q96DU3_OID21254	rs12119876	1	160459909	A	C	0.198856	-0.205771	0.00779581	7.80318e-154	52363
Sun	SLAMF7_Q9NQ25_OID20602	rs11581248	1	160720074	T	C	0.128275	-0.931688	0.00922738	0	52363
Sun	SLAMF8_Q9P0V8_OID21214	rs34687326	1	159799910	A	G	0.115491	-1.35698	0.00965035	0	52363
Sun	SLC16A1_P53985_OID20799	rs202094726	1	113468002	T	TC	0.555003	-0.0603207	0.00637527	1.51532e-21	52363
Sun	SLC27A4_Q6P1M0_OID20814	rs137948800	9	131069717	TA	T	0.124915	0.0913199	0.00941877	1.5751e-22	52363
Sun	SLC39A14_Q15043_OID20852	rs35486529	8	22251868	T	C	0.253634	-0.102946	0.00717886	6.13862e-47	52363
Sun	SLC39A5_Q6ZMH5_OID20539	rs147572362	12	56625114	C	T	0.00704599	-0.68665	0.0345675	4.16699e-88	52363
Sun	SLC4A1_P02730_OID30369	rs5035	17	42338998	G	T	0.042468	-0.146018	0.0148994	5.61479e-23	52363
Sun	SLC9A3R1_O14745_OID30630	rs8064299	17	72762646	A	C	0.530541	0.092139	0.00623006	8.5707e-50	52363
Sun	SLC9A3R2_Q15599_OID31445	rs3211995	16	2089006	A	G	0.169029	-0.137535	0.00829172	4.32473e-62	52363
Sun	SLIT2_O94813_OID20862	rs587668	4	20190972	T	C	0.698153	-0.0564705	0.0069025	1.40555e-16	52363
Sun	SLITRK1_Q96PX8_OID30510	rs2876803	13	84368785	A	T	0.178364	0.156957	0.00787119	9.02693e-89	52363
Sun	SLITRK2_Q9H156_OID21409	rs6626211	X	146064128	A	G	0.662841	0.095632	0.00517973	2.05959e-76	52363
Sun	SLITRK6_Q9H5Y7_OID20094	rs12863734	13	86370571	A	G	0.0168346	-1.41179	0.023966	0	52363
Sun	SLMAP_Q14BN4_OID31441	rs1354034	3	56849749	C	T	0.589347	0.0720902	0.0061829	1.0249e-31	52363
Sun	SLURP1_P55000_OID30404	rs10624245	8	143815697	CTG	C	0.539656	0.393902	0.00604241	0	52363
Sun	SMAD1_Q15797_OID21180	rs34978105	4	146479247	A	C	0.53852	-0.0435305	0.00626869	1.90421e-12	52363
Sun	SMAD3_P84022_OID31418	-	15	67366002	C	CATTTT	0.469794	0.20243	0.0061079	3.65294e-241	52363
Sun	SMAD5_Q99717_OID21353	rs762816627	5	135512146	C	CAAAAA	0.327041	0.0442538	0.00642172	2.76484e-12	52363
Sun	SMOC1_Q9H4F8_OID21461	rs1958078	14	70354858	C	A	0.837234	0.358336	0.00784221	0	52363
Sun	SMOC2_Q9H3U7_OID20730	rs11759500	6	168867417	C	T	0.271581	-0.383517	0.00638993	0	52363
Sun	SMPD1_P17405_OID21028	rs1050239	11	6415463	A	G	0.236553	-0.432881	0.00685018	0	52363
Sun	SMPD3_Q9NY59_OID30477	rs375605240	16	68311219	TTTTATTTATTTATTTA	T	0.661006	0.0472072	0.00679028	1.79851e-12	52363
Sun	SMPDL3A_Q92484_OID20676	rs28385609	6	123122464	T	C	0.137012	-1.02943	0.0085458	0	52363
Sun	SNAP25_P60880_OID30811	rs362562	20	10243186	A	G	0.409617	-0.11109	0.00610893	3.40182e-74	52363
Sun	SNAP29_O95721_OID21506	rs780925706	22	21301529	CTT	C	0.0824291	-0.129635	0.0111985	2.72328e-31	52363
Sun	SNCA_P37840_OID30645	rs17016299	4	90786665	A	C	0.0820127	-0.0865425	0.0112831	8.59315e-15	52363
Sun	SNCG_O76070_OID20971	rs873110	10	88724619	T	C	0.244098	-1.04744	0.00693211	0	52363
Sun	SNED1_Q8TER0_OID30205	rs4234090	2	241922182	T	C	0.364611	0.116414	0.00639119	1.97066e-74	52363
Sun	SNX15_Q9NRS6_OID30644	rs2670910	11	64807136	A	G	0.0911491	-0.776178	0.0105925	0	52363
Sun	SNX18_Q96RF0_OID31476	rs5019420	5	53810182	A	G	0.808265	-0.0875426	0.00784151	3.05886e-29	52363
Sun	SNX2_O60749_OID31374	rs27740	5	122204772	T	A	0.565549	0.0964967	0.00622817	1.91645e-54	52363
Sun	SNX9_Q9Y5X1_OID20135	rs688181	6	158092638	C	T	0.721158	-0.0841432	0.00674498	5.11436e-36	52363
Sun	SOD1_P00441_OID20386	rs116890459	21	33000527	C	T	0.000570423	-1.1702	0.135488	2.88726e-18	52363
Sun	SOD2_P04179_OID21114	rs9457699	6	160071652	G	T	0.300594	0.1569	0.00644391	3.00147e-131	52363
Sun	SOD3_P08294_OID30683	rs1799895	4	24801834	G	C	0.0129021	2.25382	0.0258228	0	52363
Sun	SORBS1_Q9BX66_OID30978	rs57682907	10	97155873	G	T	0.06548	0.0848885	0.0123253	2.84231e-12	52363
Sun	SORCS2_Q96PQ0_OID21262	rs4234798	4	7219933	G	T	0.620086	-0.423658	0.00600083	0	52363
Sun	SORD_Q00796_OID21453	rs55739437	15	45361180	T	A	0.174925	0.199095	0.008999	9.25981e-109	52363
Sun	SORT1_Q99523_OID20213	rs61394658	1	109873290	A	G	0.223279	-0.184468	0.00723691	1.2761e-143	52363
Sun	SOST_Q9BQB4_OID20204	rs76410205	17	41807508	T	C	0.078755	-0.0966357	0.0104198	8.9447e-21	52363
Sun	SPACA5_SPACA5B_Q96QH8_OID30990	rs2152823	X	47927449	A	G	0.534635	0.117274	0.00505052	1.42385e-119	52363
Sun	SPAG1_Q07617_OID30979	rs2439457	8	101224664	C	T	0.572017	-0.709851	0.00627697	0	52363
Sun	SPARC_P09486_OID21511	rs576037440	5	151062590	A	G	0.00348204	-0.714251	0.054785	3.75117e-39	52363
Sun	SPARCL1_Q14515_OID20361	rs56273319	4	88413024	G	A	0.374879	0.700583	0.00635001	0	52363
Sun	SPESP1_Q6UW49_OID30298	rs72752337	15	69198385	C	T	0.00629284	1.37335	0.0368324	1.3598e-304	52363
Sun	SPINK1_P00995_OID21097	rs7725017	5	147217823	A	C	0.618837	-0.386602	0.00624056	0	52363
Sun	SPINK2_P20155_OID30627	rs6820553	4	57690960	T	A	0.0274988	1.33843	0.0173044	0	52363
Sun	SPINK4_O60575_OID20509	rs1630171	9	33234039	G	A	0.170239	1.05497	0.00815115	0	52363
Sun	SPINK5_Q9NQ38_OID21148	rs2052534	5	147504759	C	T	0.613222	0.412999	0.00613149	0	52363
Sun	SPINK6_Q6UWN8_OID21450	rs12717962	5	147566124	G	A	0.561448	-0.354789	0.00593825	0	52363
Sun	SPINK8_P0C7L1_OID30153	rs11718350	3	48360992	G	T	0.304444	-0.462544	0.00689443	0	52363
Sun	SPINT1_O43278_OID21109	rs17658212	15	41145919	T	C	0.0570086	-0.654935	0.0134982	0	52363
Sun	SPINT2_O43291_OID20720	rs71354995	19	38791841	G	A	0.256741	-0.169713	0.00682249	6.84781e-137	52363
Sun	SPINT3_P49223_OID31509	rs6032259	20	44141331	G	A	0.531972	0.0977248	0.00383073	7.48926e-144	52363
Sun	SPOCK1_Q08629_OID20924	rs717968	5	136891892	C	A	0.366791	-0.130772	0.00621102	1.03251e-98	52363
Sun	SPON1_Q9HCB6_OID20759	rs10832164	11	14048480	T	C	0.511635	-0.288408	0.00578702	0	52363
Sun	SPON2_Q9BUD6_OID20221	rs6836335	4	1165748	C	T	0.122947	0.293206	0.00921984	3.07224e-222	52363
Sun	SPP1_P10451_OID20322	rs4660	4	88904005	A	G	0.00286102	-0.898988	0.0570496	3.02556e-56	52363
Sun	SPRED2_Q7Z698_OID30423	rs7583469	2	65651356	C	T	0.577922	-0.0633352	0.00631692	5.84187e-24	52363
Sun	SPRR3_Q9UBC9_OID31131	rs61811427	1	152968419	T	C	0.556056	0.233085	0.00575068	0	52363
Sun	SPRY2_O43597_OID20475	rs504122	13	80911525	A	G	0.358984	-0.0842388	0.00646892	4.58195e-39	52363
Sun	SPTLC1_O15269_OID31086	rs45461899	9	94830356	A	C	0.0234252	-0.562526	0.0205197	9.35135e-166	52363
Sun	SRP14_P37108_OID21324	rs7535	15	40328575	C	G	0.921643	-0.0906505	0.0111705	2.42554e-16	52363
Sun	SRPX_P78539_OID30310	rs35318931	X	38009121	A	G	0.0827582	-1.00311	0.00847651	0	52363
Sun	SSC4D_Q8WTU2_OID20182	rs12540573	7	76039013	C	A	0.0640353	0.701813	0.0116974	0	52363
Sun	SSC5D_A1L4H1_OID20351	rs55799523	19	55999545	A	C	0.274652	0.53017	0.00673594	0	52363
Sun	SSNA1_O43805_OID31453	-	9	140105525	A	G	0.000692417	-1.46045	0.118769	4.72578e-35	52363
Sun	ST13_P50502_OID30624	rs5995963	22	41302973	T	A	0.53416	-0.0519596	0.00603286	3.56599e-18	52363
Sun	ST3GAL1_Q11201_OID21322	rs9643300	8	134503148	T	C	0.569343	-0.227268	0.00600406	0	52363
Sun	ST6GAL1_P15907_OID20302	rs4686837	3	186739677	A	G	0.312673	-0.169751	0.00643537	1.23129e-153	52363
Sun	ST8SIA1_Q92185_OID30442	rs2300738	12	22433636	G	A	0.0711789	-0.0828751	0.0122709	7.20154e-12	52363
Sun	STAB2_Q8WWQ8_OID30401	rs115840458	12	104034048	G	A	0.0646075	0.786404	0.0118868	0	52363
Sun	STAMBP_O95630_OID20955	rs559935910	2	74117117	A	G	0.00176362	-0.790144	0.0838161	2.10762e-21	52363
Sun	STAT2_P52630_OID30536	rs61754171	12	56737257	G	A	0.0179759	-0.581952	0.023937	7.35074e-131	52363
Sun	STC1_P52823_OID21014	-	8	23745768	G	GTA	0.0801479	0.100702	0.0108966	1.21421e-20	52363
Sun	STC2_O76061_OID21157	-	5	172763654	T	TA	0.409528	0.0729844	0.00636633	9.98847e-31	52363
Sun	STK4_Q13043_OID20140	-	20	43659815	A	AT	0.472871	0.054615	0.00617153	4.39532e-19	52363
Sun	STX16_O14662_OID21170	rs218476	20	57237670	A	G	0.382629	0.0553191	0.00641275	3.165e-18	52363
Sun	STX7_O15400_OID30560	rs3813356	6	132834518	T	C	0.440522	-0.582208	0.00613068	0	52363
Sun	STX8_Q9UNK0_OID20531	rs71358249	17	9332802	C	T	0.244021	0.102536	0.00730413	4.5571e-45	52363
Sun	STXBP1_P61764_OID31054	rs2251106	9	130289164	T	C	0.645732	-0.0569905	0.00648342	7.4653e-19	52363
Sun	SUGP1_Q8IWZ8_OID31524	rs17751061	19	19413092	T	C	0.153768	0.324103	0.008474	0	52363
Sun	SULT1A1_P50225_OID21031	-	16	28579915	G	GT	0.454068	-0.0990556	0.00617091	2.76646e-58	52363
Sun	SULT2A1_Q06520_OID20508	rs62129966	19	48374950	A	C	0.159541	-0.363145	0.00832324	0	52363
Sun	SUMF1_Q8NBK3_OID30486	rs10494172	3	4410619	C	G	0.485158	-0.104733	0.00632976	8.53726e-62	52363
Sun	SUMF2_Q8NBJ7_OID21032	rs35384521	7	56145825	A	G	0.0183951	-1.5156	0.0223982	0	52363
Sun	SUOX_P51687_OID31031	rs141735896	12	56397802	T	C	0.00552287	-0.411685	0.0402366	7.15636e-25	52363
Sun	SUSD1_Q6UWL2_OID20072	rs146879704	9	114886569	T	C	0.00315338	-1.25754	0.0554718	4.44007e-114	52363
Sun	SUSD2_Q9UGT4_OID21098	rs117587385	22	24577204	A	G	0.0359942	1.19412	0.0160342	0	52363
Sun	SUSD4_Q5VX71_OID31398	rs61837633	1	223444182	T	G	0.391126	-0.376088	0.00625287	0	52363
Sun	SUSD5_O60279_OID30650	-	3	33191013	G	GC	0.814539	-0.489052	0.0073572	0	52363
Sun	SV2A_Q7L0J3_OID30965	rs72692819	1	149903122	C	G	0.0770913	-0.288746	0.0116868	4.49477e-135	52363
Sun	SWAP70_Q9UH65_OID31477	rs74992301	11	9673993	C	T	0.0583451	0.298394	0.013033	2.5896e-116	52363
Sun	SYAP1_Q96A49_OID30636	rs4830563	X	16762158	A	G	0.298636	-0.0561531	0.00558211	4.17208e-24	52363
Sun	SYTL4_Q96C24_OID30339	rs8780	X	99929532	C	G	0.334496	-0.14098	0.00539782	1.14003e-150	52363
Sun	TACC3_Q9Y6A5_OID21285	rs745543985	4	1741533	C	CCGTCCCCATCCCCCTCGCCATCCT	0.456991	0.211379	0.00615728	1.40362e-258	52363
Sun	TACSTD2_P09758_OID21447	rs7333	1	59041220	T	C	0.176731	-0.892743	0.00844241	0	52363
Sun	TAFA5_Q7Z5A7_OID21321	rs97762	22	48766050	T	C	0.740139	0.177098	0.00719083	3.14265e-134	52363
Sun	TALDO1_P37837_OID30414	rs150770244	11	824410	A	G	0.00688449	0.528604	0.0393656	2.07034e-41	52363
Sun	TANK_Q92844_OID20474	rs2358016	2	162007430	G	C	0.488563	-0.0474624	0.00615803	6.42035e-15	52363
Sun	TARBP2_Q15633_OID20870	rs10876550	12	54712308	A	G	0.572341	0.0449753	0.00623587	2.74965e-13	52363
Sun	TBC1D17_Q9HA65_OID20844	rs746738	19	50386340	C	T	0.437028	0.394543	0.00608644	0	52363
Sun	TBC1D23_Q9NUY8_OID21286	rs1609481	3	99976462	C	T	0.577015	-0.152389	0.00618265	1.9406e-134	52363
Sun	TBCA_O75347_OID30616	rs254415	5	77071703	T	G	0.294474	0.140067	0.0067785	3.69679e-95	52363
Sun	TBCB_Q99426_OID20993	rs2231569	19	36605875	T	G	0.0409954	0.131025	0.0157271	4.00267e-17	52363
Sun	TBCC_Q15814_OID20942	rs2234026	6	42713618	G	A	0.987558	0.594609	0.0274818	4.07594e-104	52363
Sun	TCL1A_P56279_OID20987	rs78986913	14	96162418	A	G	0.0410412	-0.68847	0.0148117	0	52363
Sun	TCN1_P20061_OID30687	rs34324219	11	59623378	A	C	0.104902	-0.748316	0.00961685	0	52363
Sun	TCN2_P20062_OID20341	rs740234	22	31008745	G	A	0.197008	0.623241	0.0073236	0	52363
Sun	TCOF1_Q13428_OID30316	rs56180593	5	149740732	T	C	0.00474404	-0.533538	0.044053	4.6026e-34	52363
Sun	TCTN3_Q6NUS6_OID30326	rs12357173	10	97444603	T	C	0.333744	0.635343	0.00635422	0	52363
Sun	TDGF1_P13385_OID20816	rs112481213	3	46619238	A	T	0.23529	1.32039	0.0073949	0	52363
Sun	TDP1_Q9NUW8_OID31403	rs7144865	14	90401402	T	G	0.0291942	0.263662	0.0193594	1.53694e-42	52363
Sun	TDRKH_Q9Y2W6_OID20875	rs2495396	1	151744928	C	T	0.500658	-0.314114	0.00620476	0	52363
Sun	TEF_Q10587_OID30103	rs2234053	22	41777315	T	G	0.220895	0.0754316	0.00762377	2.20419e-23	52363
Sun	TEK_Q02763_OID21496	rs682632	9	27183463	C	A	0.961638	-1.03771	0.015681	0	52363
Sun	TEX101_Q9BY14_OID30971	rs35033974	19	43920612	T	G	0.121671	-0.343788	0.00673807	0	52363
Sun	TF_P02787_OID30783	rs8177245	3	133479230	G	A	0.334889	0.328632	0.00642159	0	52363
Sun	TFF1_P04155_OID21154	rs3761376	21	43787038	A	G	0.241878	-0.286687	0.00684677	0	52363
Sun	TFF2_Q03403_OID20787	rs225343	21	43775780	C	A	0.712694	0.120325	0.00648912	4.6814e-77	52363
Sun	TFF3_Q07654_OID20371	rs118095917	21	43733628	T	C	0.00594491	-1.19268	0.0376983	5.63339e-220	52363
Sun	TFPI_P10646_OID20388	rs7576066	2	188343781	A	G	0.296892	0.350367	0.00644445	0	52363
Sun	TFPI2_P48307_OID21512	rs62466699	7	93579292	C	T	0.0575362	0.234884	0.01256	2.43128e-78	52363
Sun	TFRC_P02786_OID20369	rs3817672	3	195800811	T	C	0.545729	-0.50968	0.00599436	0	52363
Sun	TG_P01266_OID31359	rs75143612	8	133849655	C	G	0.0256334	0.232923	0.0189147	3.78928e-35	52363
Sun	TGFA_P01135_OID20600	rs6708912	2	70775084	A	C	0.115892	0.178181	0.00950757	1.14723e-78	52363
Sun	TGFB1_P01137_OID20621	rs73045269	19	41825191	T	C	0.162795	0.289232	0.00817181	1.06071e-274	52363
Sun	TGFB2_P61812_OID31417	rs12034138	1	218692641	T	C	0.134211	0.203319	0.00938743	2.51926e-104	52363
Sun	TGFBI_Q15582_OID20417	rs13159365	5	135389433	T	C	0.497849	-0.547058	0.0060055	0	52363
Sun	TGFBR2_P37173_OID21493	rs55762812	3	30512593	G	A	0.10546	-0.0700179	0.0093016	2.58582e-14	52363
Sun	TGFBR3_Q03167_OID20255	rs1805110	1	92327045	A	G	0.0864981	-0.234166	0.0106432	1.39411e-107	52363
Sun	TGM2_P21980_OID20141	rs742413	20	36797487	T	C	0.613563	0.167721	0.0060939	4.68818e-167	52363
Sun	TGOLN2_O43493_OID30691	rs4247303	2	85554080	A	G	0.484868	-0.688213	0.00598766	0	52363
Sun	THBD_P07204_OID20231	rs1042579	20	23028724	A	G	0.184888	0.198615	0.00748479	1.87219e-155	52363
Sun	THBS2_P35442_OID21104	rs78109196	6	169624701	A	C	0.096103	0.638974	0.0103013	0	52363
Sun	THBS4_P35443_OID20368	rs2438632	5	79392193	T	G	0.392846	0.224743	0.00617493	2.45876e-290	52363
Sun	THOP1_P52888_OID20194	rs550767741	19	2786763	ATTTTTTTTTTTTTTTTTTTTTTTTTTTTTTTT	A	0.31072	0.265727	0.00648302	0	52363
Sun	THPO_P40225_OID20098	rs78565404	3	184090242	T	C	0.0560331	0.138442	0.0136072	1.29294e-24	52363
Sun	THSD1_Q9NS62_OID30476	rs149590732	13	52971687	G	A	0.00371526	1.11524	0.0516683	1.25302e-103	52363
Sun	THTPA_Q9BU02_OID31375	rs28403575	14	24025340	T	C	0.0895159	-0.754078	0.0107428	0	52363
Sun	THY1_P04216_OID21050	rs55933700	11	119293913	T	G	0.0241665	-1.07325	0.0205756	0	52363
Sun	TIE1_P35590_OID20303	rs3768046	1	43766426	G	A	0.625353	0.194829	0.00592424	1.69991e-237	52363
Sun	TIGAR_Q9NQ88_OID20894	rs3217860	12	4399050	G	A	0.248529	-0.0612815	0.00732056	2.85295e-17	52363
Sun	TIGIT_Q495A1_OID31320	rs6792290	3	114013194	G	C	0.287999	0.0938049	0.00690087	2.19722e-42	52363
Sun	TIMD4_Q96H15_OID20375	rs55776147	5	156400808	G	A	0.630207	-0.226357	0.00605216	1.88001e-306	52363
Sun	TIMM10_P62072_OID30358	rs2848626	11	57283988	T	C	0.773376	-0.212621	0.00738042	8.32234e-183	52363
Sun	TIMP1_P01033_OID20418	rs149986790	X	47446041	A	G	0.00352817	0.668023	0.0469965	3.73399e-46	52363
Sun	TIMP2_P16035_OID30318	rs7405712	17	76923151	A	G	0.440013	0.0890438	0.00616064	1.18854e-47	52363
Sun	TIMP3_P35625_OID20684	rs11404116	22	33164633	AT	A	0.72869	-0.652043	0.00680201	0	52363
Sun	TIMP4_Q99727_OID21147	rs167408	3	12088448	G	A	0.83569	0.434912	0.00785803	0	52363
Sun	TINAGL1_Q9GZM7_OID20180	rs945214	1	32047305	G	A	0.618076	-0.0818868	0.00629263	5.15182e-39	52363
Sun	TJAP1_Q5JTD0_OID21477	rs549884121	6	43515521	CTA	C	0.00583894	-0.337032	0.0395812	8.333e-18	52363
Sun	TK1_P04183_OID31294	rs144204502	17	76183233	T	C	0.012881	-0.327169	0.0282588	2.67627e-31	52363
Sun	TLR1_Q15399_OID30532	rs5743618	4	38798648	A	C	0.270442	0.495475	0.00753064	0	52363
Sun	TLR3_O15455_OID20612	rs3775291	4	187004074	T	C	0.289153	-1.15416	0.00674875	0	52363
Sun	TLR4_O00206_OID30428	rs4986791	9	120475602	T	C	0.0614398	-0.330605	0.0131308	3.50424e-140	52363
Sun	TMED8_Q6PL24_OID31462	rs11620921	14	77939965	G	A	0.592745	-0.0691964	0.00624972	8.58411e-29	52363
Sun	TMEM106A_Q96A25_OID31411	rs6503726	17	41284742	C	T	0.35936	-0.10326	0.00648518	2.21324e-57	52363
Sun	TMEM132A_Q24JP5_OID30287	rs2074417	11	60697643	T	C	0.398831	0.608009	0.0063705	0	52363
Sun	TMEM25_Q86YD3_OID31015	rs45558732	11	118402962	T	G	0.0323775	-1.00485	0.0176717	0	52363
Sun	TMPRSS11D_O60235_OID31103	rs17088693	4	68709690	C	T	0.0355071	-0.33947	0.0164027	1.88236e-95	52363
Sun	TMPRSS15_P98073_OID21364	rs2824805	21	19770734	C	G	0.173933	0.117783	0.00798944	1.7233e-49	52363
Sun	TMPRSS5_Q9H3S3_OID20947	rs7114195	11	113561421	C	A	0.650411	0.781183	0.00636196	0	52363
Sun	TNC_P24821_OID20359	rs58160054	9	117902853	C	G	0.2988	-0.256606	0.0062526	0	52363
Sun	TNFAIP2_Q03169_OID31446	rs576859558	14	103609198	G	T	0.00351483	-0.579348	0.0532292	6.86795e-28	52363
Sun	TNFAIP8_O95379_OID20433	rs1035376	5	118648250	A	G	0.883391	0.114785	0.00975728	2.99025e-32	52363
Sun	TNFAIP8L2_Q6P589_OID30629	rs4970991	1	151004003	C	T	0.779613	0.0637795	0.00761012	2.62668e-17	52363
Sun	TNFRSF10A_O00220_OID20967	rs13278062	8	23082971	T	G	0.496939	-0.462556	0.00597772	0	52363
Sun	TNFRSF10B_O14763_OID20981	rs13265018	8	22886020	G	A	0.890325	0.525153	0.00900702	0	52363
Sun	TNFRSF10C_O14798_OID20265	-	8	22972271	G	GT	0.00716688	-1.79074	0.0288415	0	52363
Sun	TNFRSF11A_Q9Y6Q6_OID20646	rs113339733	18	60018329	A	G	0.183617	-0.585166	0.00772119	0	52363
Sun	TNFRSF11B_O00300_OID20735	rs748443516	8	120101198	C	CT	0.497804	0.193385	0.00555608	9.86276e-266	52363
Sun	TNFRSF12A_Q9NP84_OID21482	rs74758164	16	3070628	T	C	0.0379519	0.14703	0.0147931	1.40688e-23	52363
Sun	TNFRSF13B_O14836_OID20702	rs4792800	17	16845167	G	A	0.10567	-0.165758	0.00959203	3.28128e-67	52363
Sun	TNFRSF13C_Q96RJ3_OID20480	rs763882049	22	42327496	A	AAT	0.0943028	-0.759935	0.0107679	0	52363
Sun	TNFRSF14_Q92956_OID20783	rs2495366	1	2488930	A	G	0.503836	0.113124	0.00599281	8.87961e-80	52363
Sun	TNFRSF17_Q02223_OID30589	rs11570136	16	12058832	A	T	0.325024	-0.138387	0.00643638	7.65954e-103	52363
Sun	TNFRSF19_Q9NS68_OID21446	rs4770465	13	24168742	G	A	0.307383	0.238409	0.00621766	0	52363
Sun	TNFRSF1A_P19438_OID21155	rs4149584	12	6442643	T	C	0.0159021	-0.28428	0.0230648	3.31087e-35	52363
Sun	TNFRSF1B_P20333_OID21145	rs5746011	1	12250004	C	T	0.0375857	-0.382463	0.0155106	1.5039e-134	52363
Sun	TNFRSF21_O75509_OID21052	rs148598211	6	47254244	T	C	0.00395499	-1.79943	0.0470164	0	52363
Sun	TNFRSF4_P43489_OID20653	rs3813202	1	1150764	A	G	0.0389418	-0.287528	0.0151224	6.6073e-81	52363
Sun	TNFRSF6B_O95407_OID20964	rs6011040	20	62337406	G	A	0.672407	-0.300495	0.00636823	0	52363
Sun	TNFRSF8_P28908_OID21049	rs35249183	1	12099345	G	A	0.0956417	0.332778	0.0104202	4.24604e-224	52363
Sun	TNFRSF9_Q07011_OID20985	rs2493214	1	7994420	G	A	0.205119	-0.183352	0.00742701	7.34103e-135	52363
Sun	TNFSF10_P50591_OID20611	rs79287178	3	172294500	A	G	0.0291583	-0.529385	0.0180417	1.498e-189	52363
Sun	TNFSF11_O14788_OID20592	rs2062305	13	43052880	A	G	0.522522	-0.114206	0.00600884	7.55817e-81	52363
Sun	TNFSF12_O43508_OID20624	rs80067372	17	7452752	A	G	0.275231	0.374696	0.00677565	0	52363
Sun	TNFSF13_O75888_OID20733	rs3803800	17	7462969	G	A	0.771642	-0.313426	0.00694532	0	52363
Sun	TNFSF13B_Q9Y275_OID20272	rs374039502	13	108960385	A	T	0.0199655	0.758662	0.0219636	9.46702e-262	52363
Sun	TNFSF14_O43557_OID20953	rs344560	19	6665020	C	T	0.946115	0.555496	0.0136622	0	52363
Sun	TNFSF8_P32971_OID30384	rs10081728	9	117695685	C	T	0.415643	-0.226227	0.00615519	5.04352e-296	52363
Sun	TNIP1_Q15025_OID31120	rs12518386	5	150438085	A	G	0.254454	-0.0478142	0.00683933	1.36404e-12	52363
Sun	TNN_Q9UQP3_OID30412	rs77382942	1	175091646	A	T	0.631789	-0.864423	0.00633829	0	52363
Sun	TNR_Q92752_OID20957	rs2235256	1	175569047	G	A	0.450999	-0.365358	0.00603874	0	52363
Sun	TOP2B_Q02880_OID30559	rs73054085	3	25711828	T	C	0.19069	0.0953342	0.00782516	1.91383e-34	52363
Sun	TOR1AIP1_Q5JTV8_OID30195	rs486906	1	179863237	T	G	0.615101	0.720011	0.00635811	0	52363
Sun	TP53_P04637_OID21232	rs1641549	17	7574775	T	C	0.269736	0.0635026	0.00718867	5.06316e-19	52363
Sun	TP53I3_Q53FA7_OID30632	rs1134516	2	24342532	A	G	0.15769	-0.593159	0.00844389	0	52363
Sun	TPK1_Q9H3S4_OID30338	rs10261806	7	144532104	A	G	0.418642	-0.331235	0.00621914	0	52363
Sun	TPMT_P51580_OID21270	rs1142345	6	18130918	C	T	0.0486141	-1.1045	0.014476	0	52363
Sun	TPP1_O14773_OID20750	rs140726254	11	6638944	A	G	0.00204352	2.91145	0.0666939	0	52363
Sun	TPPP3_Q9BW30_OID20842	rs13334882	16	67385358	C	T	0.0908432	-0.121278	0.0115486	4.24944e-26	52363
Sun	TPR_P12270_OID30143	rs115482159	1	186301436	T	C	0.00545869	0.456913	0.0431188	1.54493e-26	52363
Sun	TPSAB1_Q15661_OID20642	rs8051930	16	1295818	A	T	0.47849	0.813798	0.00612731	0	52363
Sun	TPSD1_Q9BZJ3_OID30982	rs2745083	16	1284174	A	C	0.51985	0.264116	0.00628368	0	52363
Sun	TRAF2_Q12933_OID20507	-	9	139826950	G	A	0.607025	-0.0618946	0.00614458	3.63479e-24	52363
Sun	TRDMT1_O14717_OID31335	rs11254406	10	17191692	G	A	0.463698	-0.139746	0.00623651	1.65459e-111	52363
Sun	TREH_O43280_OID30388	rs558593	11	118562520	T	C	0.320173	0.872117	0.00655179	0	52363
Sun	TREM2_Q9NZC2_OID20731	rs143332484	6	41129207	T	C	0.00945506	-1.45427	0.0278969	0	52363
Sun	TREML2_Q5T2D2_OID21120	rs11759347	6	41167097	A	C	0.236683	0.301221	0.00709992	0	52363
Sun	TRIM21_P19474_OID20533	rs199881122	11	4406607	T	A	0.00226688	-1.18833	0.0631545	2.77981e-79	52363
Sun	TRIM25_Q14258_OID31482	rs205498	17	54978794	A	G	0.736526	-0.0973897	0.00679852	7.62185e-47	52363
Sun	TRIM5_Q9C035_OID20526	rs11821656	11	5689144	C	G	0.143452	-0.4028	0.00868228	0	52363
Sun	TRIM58_Q8NG06_OID31429	rs10749636	1	248020448	A	G	0.748631	0.228838	0.00716187	2.51215e-224	52363
Sun	TSC22D1_Q15714_OID31016	rs963569	13	45242379	T	C	0.785865	-0.0674649	0.00747282	8.73889e-20	52363
Sun	TSPAN1_O60635_OID20078	rs112127024	1	46599482	TA	T	0.246391	-0.0534206	0.00669868	7.6317e-16	52363
Sun	TSPAN15_O95858_OID30095	rs1227967	10	71267834	C	T	0.502675	-0.0593167	0.00633177	3.69224e-21	52363
Sun	TSPAN8_P19075_OID31470	rs3763978	12	71533534	G	C	0.395253	0.481314	0.00604321	0	52363
Sun	TSPYL1_Q9H0U9_OID30512	rs61746508	6	116600616	A	C	0.0153825	-0.426725	0.025184	1.06039e-64	52363
Sun	TST_Q16762_OID20868	rs4821544	22	37258503	C	T	0.312824	-0.100835	0.00677975	2.46878e-50	52363
Sun	TTF2_Q9UNY4_OID30942	rs3754109	1	117601619	A	G	0.057786	0.751868	0.0133156	0	52363
Sun	TTR_P02766_OID30782	rs1667229	18	29142206	C	T	0.551438	0.121136	0.00586041	3.21073e-95	52363
Sun	TWF2_Q6IBS0_OID30386	rs610060	3	52273421	A	G	0.502187	-0.0636652	0.00610138	8.62077e-26	52363
Sun	TXN_P10599_OID30670	rs146018216	9	113013717	A	G	0.00147033	-1.08214	0.0793831	1.29433e-42	52363
Sun	TXNDC15_Q96J42_OID21495	rs3733897	5	134223593	G	A	0.132441	1.15648	0.00889875	0	52363
Sun	TXNDC5_Q8NBS9_OID21012	rs7764128	6	7882205	A	G	0.119942	-0.148309	0.00953951	8.36083e-55	52363
Sun	TXNDC9_O14530_OID31121	rs2290261	2	100021184	G	A	0.413477	-0.0504922	0.00623256	2.71745e-16	52363
Sun	TXNRD1_Q16881_OID21135	rs201402862	12	104707047	A	G	0.000781519	-1.20646	0.12321	6.09909e-23	52363
Sun	TYMP_P19971_OID20234	rs131805	22	50964153	C	T	0.789639	0.220018	0.00756119	1.88444e-186	52363
Sun	TYRO3_Q06418_OID20161	rs17676332	15	41859499	T	C	0.293871	-0.64564	0.00668574	0	52363
Sun	TYRP1_P17643_OID30517	rs10960751	9	12675264	C	T	0.600104	-0.0766804	0.00647093	1.07619e-32	52363
Sun	UBAC1_Q9BSL1_OID21336	rs112505519	9	138830120	C	G	0.00159876	-0.935166	0.0808717	3.15143e-31	52363
Sun	UBE2L6_O14933_OID30321	rs28362947	11	57369008	G	C	0.259067	0.254804	0.00694954	1.32587e-294	52363
Sun	UBXN1_Q04323_OID30654	rs142782985	11	62446179	C	G	0.00207494	0.583278	0.0666386	1.04011e-18	52363
Sun	ULBP2_Q9BZM5_OID20919	rs60340208	6	150301195	AG	A	0.164643	-0.631941	0.00825662	0	52363
Sun	UMOD_P07911_OID20237	rs12917707	16	20367690	T	G	0.173039	-0.950875	0.00770041	0	52363
Sun	UNC5D_Q6UXZ4_OID30447	-	8	35102286	T	TG	0.413346	-0.0622752	0.00636907	7.01445e-23	52363
Sun	UPB1_Q9UBR1_OID30352	rs143493067	22	24919586	A	G	0.00162347	-0.888345	0.0745549	4.92476e-33	52363
Sun	UROD_P06132_OID30603	rs2298005	1	45476663	A	G	0.254097	-0.479207	0.00693786	0	52363
Sun	UROS_P10746_OID30964	rs12253180	10	127472170	G	A	0.793553	-0.134661	0.00773241	3.16671e-68	52363
Sun	USP28_Q96RU2_OID31084	rs4288784	11	113745608	G	C	0.0715813	-0.144248	0.0120848	3.8269e-33	52363
Sun	USP8_P40818_OID20110	rs4380013	15	50759428	A	G	0.2018	0.0938581	0.00762463	4.00829e-35	52363
Sun	UXS1_Q8NBZ7_OID21189	rs894392	2	106789660	C	T	0.0800873	0.181634	0.0113582	7.32986e-58	52363
Sun	VAMP5_O95183_OID20071	rs6547623	2	85801964	A	T	0.298084	0.0857847	0.00682591	1.59298e-36	52363
Sun	VAMP8_Q9BV40_OID30555	rs3731828	2	85806266	T	C	0.279685	-0.168263	0.00689697	9.27923e-132	52363
Sun	VASH1_Q7L8A9_OID20516	rs11159226	14	77181432	G	T	0.0673245	0.215406	0.0123805	4.21154e-68	52363
Sun	VASN_Q6EMK4_OID20345	rs35713275	16	4431360	A	G	0.0603188	-0.896459	0.0131935	0	52363
Sun	VAT1_Q99536_OID21382	rs9911630	17	41188342	G	A	0.349936	-0.144935	0.00650204	2.27431e-110	52363
Sun	VAV3_Q9UKW4_OID30795	rs1619485	1	108608347	C	T	0.454248	-0.0537254	0.0062409	3.69797e-18	52363
Sun	VCAM1_P19320_OID20396	rs12240047	1	101181342	C	T	0.210504	-0.10179	0.00736957	1.07574e-43	52363
Sun	VCAN_P13611_OID21026	rs309559	5	82833369	G	A	0.480147	-0.630326	0.00594187	0	52363
Sun	VCPKMT_Q9H867_OID31179	rs181475173	14	50691877	C	T	0.00868767	-0.398886	0.035143	3.69254e-30	52363
Sun	VEGFA_P15692_OID20650	rs6921438	6	43925607	A	G	0.484215	-0.674741	0.0059963	0	52363
Sun	VEGFB_P49765_OID30554	rs660442	11	64042997	A	G	0.19342	0.118198	0.00773912	5.80436e-53	52363
Sun	VEGFC_P49767_OID21524	rs569966216	4	177816159	A	T	0.00402191	-0.963337	0.0484394	2.61238e-88	52363
Sun	VEGFD_O43915_OID20662	rs192812042	X	15436623	A	G	0.124325	0.744901	0.007506	0	52363
Sun	VGF_O15240_OID31067	rs34985488	7	100817901	G	A	0.0808755	-0.115348	0.0111221	1.67884e-25	52363
Sun	VIT_Q6UXI7_OID30334	rs11124542	2	36994439	C	A	0.410515	0.413357	0.00551114	0	52363
Sun	VMO1_Q7Z5L0_OID21381	rs8078118	17	4690038	A	C	0.419145	0.732344	0.00614923	0	52363
Sun	VNN1_O95497_OID30711	rs146101841	6	133024504	CATAGACAT	C	0.247868	-0.999729	0.00711777	0	52363
Sun	VNN2_O95498_OID21310	rs34509155	6	133067684	CT	C	0.287164	-0.707533	0.00678704	0	52363
Sun	VPS4B_O75351_OID31386	rs116847314	18	61057007	C	A	0.0221633	0.1507	0.0209426	3.10343e-13	52363
Sun	VSIG10_Q8N0Z9_OID31400	rs7307331	12	118509191	A	G	0.310577	0.769121	0.00668909	0	52363
Sun	VSIG10L_Q86VR7_OID30189	rs1035454	19	51845556	C	T	0.587425	0.211476	0.00643102	1.87685e-237	52363
Sun	VSIG2_Q96IQ7_OID31371	rs11604175	11	124619407	T	C	0.268076	0.207326	0.00682311	4.22418e-203	52363
Sun	VSIG4_Q9Y279_OID21144	rs41306131	X	65253454	A	C	0.00940934	-1.34624	0.0249878	0	52363
Sun	VSIR_Q9H7M9_OID20131	rs10999992	10	73528898	C	T	0.145606	0.443157	0.00871798	0	52363
Sun	VSNL1_P62760_OID31105	rs4832496	2	17752538	A	G	0.278267	0.311384	0.00615521	0	52363
Sun	VSTM1_Q6UX27_OID20851	rs2433724	19	54545531	C	T	0.420134	-0.759311	0.00635441	0	52363
[truncated: 33 more rows]

## Sheet: ST3
GWAS	Trait	SNP	Chromosome	Position (build 38)	Effect Allele	Non-Effect Allele	Effect Allele Frequency	Effect	Standard Error	P-value	Sample size
Ferkingstad	10015_119_KCNAB2_KCAB2	rs806109	chr1	5992521	A	G	0.78487	0.08	0.009576	6.573e-17	35559
Ferkingstad	10037_98_SIGLEC12_SIG12	rs6509544	chr19	51500077	C	G	0.86585	-1.1717	0.008597	1e-200	35559
Ferkingstad	10042_8_SGK3_SGK3	rs145451983	chr8	66846457	C	G	0.01989	0.2281	0.028342	8.414e-16	35559
Ferkingstad	10070_22_PLCG2_PLCG2	rs12445050	chr16	81837364	T	C	0.10029	0.1847	0.013338	1.319e-43	35559
Ferkingstad	10075_75_ACBD6_ACBD6	rs80261041	chr1	180294810	TCAGCCTCCGGAGTAGCTGGGACTT	NA	0.03244	-0.1419	0.023466	1.476e-09	35559
Ferkingstad	10080_9_EIF2B1_EI2BA	rs1318465025,rs35789601	chr12	123531115	GAAA	NA	0.13791	0.0073	0.011748	0.534346	35559
Ferkingstad	10080_9_EIF2B1_EI2BA	rs541635385,rs72414803	chr12	123531115	G	NA	0.02229	-0.1949	0.027395	1.123e-12	35559
Ferkingstad	10088_37_APRT_APT	rs104894506	chr16	88810550	A	T	0.01184	-0.9857	0.037797	6.296e-150	35559
Ferkingstad	10336_3_STUB1_CHIP	rs148553428	chr16	681318	A	G	0.0091	-0.3542	0.042067	3.769e-17	35559
Ferkingstad	10346_5_STAT3_STAT3	rs4796791	chr17	42378745	C	T	0.58862	0.1541	0.008237	4.286e-78	35559
Ferkingstad	10366_11_PDGFRA_PDGFRA	rs139236922	chr4	54272481	C	T	0.01052	0.5181	0.03821	6.994e-42	35559
Ferkingstad	10370_21_STAT1_STAT1	rs568852475	chr2	191328808	G	A	0.00367	-0.4282	0.067599	2.383e-10	35559
Ferkingstad	10372_18_STAT6_STAT6	rs770378890	chr12	57102917	G	A	0.00627	-1.0911	0.0518	1.713e-98	35559
Ferkingstad	10396_6_MCL1_Mcl_1	rs1294655894	chr1	150899121	TAAACAAA	NA	0.00807	-0.8803	0.04467	1.886e-86	35559
Ferkingstad	10396_6_MCL1_Mcl_1	rs761141764,rs776408781	chr1	150899121	TAAATAAACAAA	NA	0.04178	0.0166	0.019808	0.402002	35559
Ferkingstad	10396_6_MCL1_Mcl_1	rs139214344	chr1	150899121	TAAA	NA	0.36745	0.0305	0.008157	0.0001848	35559
Ferkingstad	10396_6_MCL1_Mcl_1	rs201401853,rs61404646	chr1	150899121	TAAATAAA	NA	0.01605	-0.0147	0.030048	0.624688	35559
Ferkingstad	10396_6_MCL1_Mcl_1	rs267726	chr1	150899121	TAAATAAATAAATAAA	NA	0.46967	-0.0001	0.006027	0.986763	35559
Ferkingstad	10424_31_NPDC1_NPDC1	rs9314872	chr9	137059328	C	G	0.89915	0.0898	0.013321	1.573e-11	35559
Ferkingstad	10440_26_CLMP_ACAM	rs7946718	chr11	123197533	G	A	0.5921	0.2113	0.008322	3.116e-142	35559
Ferkingstad	10442_1_TMEM190_TM190	rs4806666	chr19	55376727	T	C	0.45691	-1.0062	0.005374	1e-200	35559
Ferkingstad	10445_20_APOM_ApoM	rs805295	chr6	31707520	T	C	0.03958	-0.4845	0.02098	5.356e-118	35559
Ferkingstad	10451_11_NUCB1_NUCB1	rs3826817	chr19	48898187	T	C	0.26776	-0.145	0.009147	1.356e-56	35559
Ferkingstad	10462_14_INSL5_INSL5	rs11809759	chr1	66804222	G	A	0.45118	0.0574	0.008099	1.365e-12	35559
Ferkingstad	10490_3_RPN1_RPN1	rs7650156	chr3	128642712	A	NA	0.58055	-0.1504	0.00803	2.839e-78	35559
Ferkingstad	10499_1_TMEM106A_T106A	rs1188833673	chr17	42978091	AAAAAC	NA	0.00478	-0.5476	0.056208	1.988e-22	35559
Ferkingstad	10511_10_COL6A3_Collagen_alpha_3_VI_	rs139498556	chr2	237381274	T	C	0.00713	-0.7524	0.046558	9.563e-59	35559
Ferkingstad	10512_13_CSF2RB_IL3RB	rs2239749	chr22	36935263	G	A	0.44269	-0.5667	0.006693	1e-200	35559
Ferkingstad	10514_5_PTGDS_PGD2_synthase	rs7040970	chr9	136964561	C	T	0.4943	0.141	0.008163	7.433e-67	35559
Ferkingstad	10521_10_MXRA8_MXRA8	rs181929025	chr1	1355705	T	C	0.01519	-0.3449	0.035471	2.394e-22	35559
Ferkingstad	10554_23_GLB1_BGAL	rs779023917	chr3	33058265	G	T	0.00517	-0.361	0.051663	2.796e-12	35559
Ferkingstad	10558_26_PCDH9_PCDH9	rs5804316	chr13	67220270	AT	A	0.8856	-0.2933	0.013358	7.505e-107	35559
Ferkingstad	10561_5_PGLYRP3_PGRP_I_alpha	rs1865234	chr1	153343308	C	T	0.89902	-0.0834	0.013375	4.508e-10	35559
Ferkingstad	10565_19_SLITRK3_SLIK3	rs62282372	chr3	165194166	G	C	0.11075	-0.4964	0.009344	1e-200	35559
Ferkingstad	10571_14_MGAT1_MGAT1	rs634501	chr5	180791668	G	A	0.74201	0.0628	0.008987	2.797e-12	35559
Ferkingstad	10603_1_HTN3_HIS3	rs78169960	chr4	70032094	G	A	0.0181	-0.7541	0.03071	3.805e-133	35559
Ferkingstad	10605_22_APMAP_APMAP	rs6036977	chr20	24921032	T	C	0.88079	-0.1558	0.01203	2.32e-38	35559
Ferkingstad	10613_33_CASC4_CASC4	rs372115513	chr15	44288755	CGCTG	C	0.00739	0.3394	0.046125	1.864e-13	35559
Ferkingstad	10627_87_APLP2_APLP2	rs73583419	chr11	130069495	A	C	0.06312	0.2786	0.016588	2.64e-63	35559
Ferkingstad	10666_7_GNPTG_GNPTG	rs9923746	chr16	1390384	G	C	0.92056	-0.5184	0.014942	1e-200	35559
Ferkingstad	10668_5_STX4_STX4	rs141062694	chr16	31038534	T	C	0.0017	-1.1151	0.100863	2.06e-28	35559
Ferkingstad	10672_75_SFTPB_SP_B	rs1130866	chr2	85666618	A	G	0.47918	-0.3953	0.006683	1e-200	35559
Ferkingstad	10708_3_GNRH2_GON2	rs6051545	chr20	3044461	TCCACC	NA	0.16942	-0.2019	0.010397	5.378e-84	35559
Ferkingstad	10714_7_ACE_ACE	rs4363	chr17	63497131	A	G	0.50211	-0.6254	0.005857	1e-200	35559
Ferkingstad	10722_13_SYK_KSYK	rs75505307	chr9	90819332	T	C	0.13282	-0.1269	0.011844	8.728e-27	35559
Ferkingstad	10737_96_SERPINB1_Serpin_B1	rs2293772	chr6	2835597	G	A	0.59603	0.0792	0.008228	6.234e-22	35559
Ferkingstad	10754_113_PROK2_Prokineticin_2	rs7634474	chr3	71780316	G	A	0.80063	-0.6555	0.007676	1e-200	35559
Ferkingstad	10772_21_CSGALNACT2_CGAT2	rs2435382	chr10	43181651	T	A	0.33153	-0.1148	0.008361	6.609e-43	35559
Ferkingstad	10800_15_SERPINH1_Collagen_binding_protein	rs514887	chr11	75581004	A	G	0.55914	0.1232	0.008064	1.072e-52	35559
Ferkingstad	10809_14_KLRB1_KLRB1	rs1135816	chr12	9598073	G	A	0.37818	-0.2296	0.008094	5.361e-177	35559
Ferkingstad	10818_36_SMPD1_ASM	rs550067660	chr11	6390700	C	NA	0.00168	-0.1389	0.10792	0.198072	35559
Ferkingstad	10818_36_SMPD1_ASM	rs1195665801,rs550365194	chr11	6390700	CCTGGCGCTGGCG	NA	0.07605	0.0575	0.015729	0.0002564	35559
Ferkingstad	10818_36_SMPD1_ASM	rs1260730799,rs775860642	chr11	6390700	CCTGGCGCTGGCGCTGGCG	NA	0.00139	0.1173	0.108769	0.280843	35559
Ferkingstad	10818_36_SMPD1_ASM	rs1050228	chr11	6390700	CCTGGCGCTGGCGCTGGCGCTGGCG	NA	0.4708	0.2847	0.008282	1e-200	35559
Ferkingstad	10818_36_SMPD1_ASM	rs749512034	chr11	6390700	CCTGGTG	NA	0.00016	-0.584	0.413615	0.157967	35559
Ferkingstad	10818_36_SMPD1_ASM	rs3838786	chr11	6390700	CCTGGTGCTGGCGCTGGCG	NA	0.41085	-0.3357	0.006183	1e-200	35559
Ferkingstad	10832_24_B4GALT6_B4GT6	rs117750096	chr18	31624513	G	T	0.03757	-1.1007	0.016779	1e-200	35559
Ferkingstad	10833_64_HHIP_HHIP	rs11727676	chr4	144737912	C	T	0.10368	0.2352	0.013296	5.054e-70	35559
Ferkingstad	10835_25_A4GNT_A4GCT	rs7632402	chr3	138142761	G	T	0.69941	-0.065	0.008533	2.595e-14	35559
Ferkingstad	10851_77_EBI3_IL27B	rs353696	chr19	4242508	C	T	0.27551	-1.1236	0.005119	1e-200	35559
Ferkingstad	10892_8_OSMR_OSMR	rs77326070	chr5	39039653	G	A	0.65511	0.1159	0.00841	3.292e-43	35559
Ferkingstad	10902_53_ASPRV1_APRV1	rs1008514346	chr2	69405246	C	NA	0.00145	-0.903	0.112462	9.799e-16	35559
Ferkingstad	10903_50_STX8_STX8	rs11078801	chr17	9433928	C	G	0.21153	0.0681	0.009708	2.307e-12	35559
Ferkingstad	10908_2_GALNT13_GLT13	rs16834610	chr2	153873982	T	C	0.04952	0.1275	0.018824	1.258e-11	35559
Ferkingstad	10917_40_GNGT2_GBGT2	rs776044056	chr17	49937906	G	A	0.00982	-0.2663	0.039008	8.68e-12	35559
Ferkingstad	10924_258_CYB5D2_NEUFC	rs118123280	chr17	4156939	A	G	0.01552	-1.0117	0.030952	1e-200	35559
Ferkingstad	10938_13_CD58_sLFA_3	rs61789227	chr1	116537006	G	A	0.02109	0.6656	0.027448	6.699e-130	35559
Ferkingstad	10940_25_SRL_SRCA	rs11640587	chr16	4214222	G	C	0.61902	-0.1185	0.00833	6.331e-46	35559
Ferkingstad	10948_14_PLD3_PLD3	rs762590435	chr19	40378025	T	C	0.00028	-1.5334	0.219348	2.735e-12	35559
Ferkingstad	10974_20_SPINK7_ISK7	rs9784645	chr5	148337418	T	G	0.25293	0.1322	0.009459	2.184e-44	35559
Ferkingstad	10977_55_UCMA_UCMA	rs1537771	chr10	13241177	T	C	0.12874	-0.3965	0.012199	1e-200	35559
Ferkingstad	11098_1_PDXK_PDXK	rs77734576	chr21	43746121	T	C	0.00354	-1.6809	0.070445	7.746e-126	35559
Ferkingstad	11102_22_REG4_REG4	rs3009182	chr1	119836055	T	C	0.77884	-0.1428	0.00999	2.376e-46	35559
Ferkingstad	11103_24_HSPB1_HSP_27	rs2908203	chr7	76294901	A	NA	0.00175	-0.1663	0.102686	0.10534	35559
Ferkingstad	11104_13_CHI3L1_YKL_40	rs12141494	chr1	203182297	A	G	0.5572	-1.0055	0.004983	1e-200	35559
Ferkingstad	11105_171_ENO1_Alpha_enolase	rs11544513	chr1	8866415	T	G	0.00515	-0.3315	0.053007	4.004e-10	35559
Ferkingstad	11117_2_SPATA20_SPT20	rs8076632	chr17	50548567	G	C	0.40822	-0.3215	0.007116	1e-200	35559
Ferkingstad	11134_30_MTRF1L_RF1ML	rs2038332	chr6	152999591	G	A	0.2119	-0.1934	0.009618	6.321e-90	35559
Ferkingstad	11142_11_ANGPTL1_ANGL1	rs4650995	chr1	178548181	T	C	0.49232	-0.3017	0.007993	1e-200	35559
Ferkingstad	11145_72_KIAA1549L_K154L	rs2753408	chr11	33378145	A	G	0.4799	-0.3242	0.006912	1e-200	35559
Ferkingstad	11152_46_KLK13_kallikrein_13	rs3760739	chr19	51035305	T	G	0.35015	-0.4443	0.007028	1e-200	35559
Ferkingstad	11177_16_KRT5_K2C5	rs641615	chr12	52519125	T	G	0.2322	-0.1558	0.009418	1.808e-61	35559
Ferkingstad	11187_11_CLEC12A_CL12A	rs476844	chr12	9984697	C	T	0.6173	-1.2272	0.003585	1e-200	35559
Ferkingstad	11192_168_TINAGL1_TINAL	rs945214	chr1	31581704	G	NA	0.54448	-0.1075	0.008398	1.618e-37	35559
Ferkingstad	11196_31_COL6A3_Collagen_alpha_3_VI_	rs11677932	chr2	237315312	A	G	0.29364	-0.0691	0.008988	1.498e-14	35559
Ferkingstad	11208_15_NAGPA_NAGPA	rs12599777	chr16	5029465	G	A	0.18221	-0.4777	0.008245	1e-200	35559
Ferkingstad	11211_7_TBCE_TBCE	rs903347	chr1	235423298	T	C	0.61337	-0.1006	0.008345	1.813e-33	35559
Ferkingstad	11214_40_DNAJB9_DNJB9	rs61749953	chr7	108571730	A	G	0.01288	-0.3192	0.036449	1.997e-18	35559
Ferkingstad	11219_95_FGFBP3_FGFP3	rs11186737	chr10	91906592	T	C	0.26326	-0.2914	0.009057	1e-200	35559
Ferkingstad	11241_8_ASL_ARLY	rs568609979	chr7	65930838	C	T	0.00503	-1.2611	0.059398	4.906e-100	35559
Ferkingstad	11248_43_UROS_HEM4	rs1935451	chr10	125816857	A	G	0.88973	-0.2956	0.013006	2.33e-114	35559
Ferkingstad	11257_1_QDPR_DHPR	rs2305316	chr4	17512129	AACCCCA	NA	0.00161	0.2198	0.104281	0.035052	35559
Ferkingstad	11257_1_QDPR_DHPR	rs67496406	chr4	17512129	AACCCC	NA	0.26239	-0.4239	0.007615	1e-200	35559
Ferkingstad	11265_8_ALDH1A1_Retinal_dehydrogenase_1	rs348452	chr9	72938469	T	C	0.23989	0.1035	0.009509	1.372e-27	35559
Ferkingstad	11266_8_SELPLG_SELPL	rs73191242	chr12	108620180	A	G	0.2105	-0.2819	0.010228	3.251e-167	35559
Ferkingstad	11277_23_ATF6_ATF6A	rs775002441	chr1	161912381	T	G	0.00073	-1.5083	0.132718	6.269e-30	35559
Ferkingstad	11278_4_COL11A2_COL11A2	rs2855437	chr6	33171178	AAAGAGAGTC	NA	0.62987	0.2345	0.008434	3.773e-170	35559
Ferkingstad	11287_14_CYB5A_Cytochrome_b5	rs17806420	chr18	74316132	T	C	0.19046	-0.1014	0.01007	7.542e-24	35559
Ferkingstad	11288_26_NT5C2_5NTC	rs764048834	chr10	101331145	T	C	0.00183	1.563	0.095563	3.959e-60	35559
Ferkingstad	11302_237_TNR_TENR	rs2235256	chr1	175599911	G	A	0.4708	-0.1315	0.008083	1.667e-59	35559
Ferkingstad	11308_8_CREB3L4_CR3L4	rs6671362	chr1	153971312	G	A	0.45722	0.1992	0.008016	2.638e-136	35559
Ferkingstad	11313_100_PCBD1_PHS	rs200188190	chr10	70885163	T	C	0.00626	-1.1575	0.05151	7.94e-112	35559
Ferkingstad	11333_82_ARHGAP25_RHG25	rs13413887	chr2	68769536	G	A	0.76808	0.1736	0.009428	1.039e-75	35559
Ferkingstad	11347_9_TALDO1_Transaldolase	rs771120190	chr11	747445	TCGCCGCCGCCGCCGCCGC	NA	0.00021	-0.5206	0.337884	0.123374	35559
Ferkingstad	11347_9_TALDO1_Transaldolase	rs534866694,rs71464113,rs771120190,rs886048656	chr11	747445	TCGCCGCCGCCGCCGC	NA	0.00109	-0.3086	0.11674	0.008206	35559
Ferkingstad	11347_9_TALDO1_Transaldolase	rs373293125	chr11	747445	TCGCCGCTGCCGC	NA	0.00095	-0.2226	0.13874	0.108617	35559
Ferkingstad	11347_9_TALDO1_Transaldolase	rs549164513,rs886048657	chr11	747445	T	NA	0.0228	0.3906	0.026035	7.009e-51	35559
Ferkingstad	11351_233_NHEJ1_NHEJ1	rs61753339	chr2	219158193	T	C	0.00809	-0.8144	0.043113	1.378e-79	35559
Ferkingstad	11356_19_DGCR14_DGC14	rs715544	chr22	19146092	A	G	0.05468	-0.1782	0.017478	2.078e-24	35559
Ferkingstad	11358_15_GRB10_GRB10	rs771965102	chr7	50750150	T	C	0.01406	-0.2692	0.03497	1.382e-14	35559
Ferkingstad	11360_39_RRM1_RRM1	rs11031142	chr11	4153145	T	C	0.56174	-0.055	0.008113	1.205e-11	35559
Ferkingstad	11377_19_ADH7_ADH7	rs1573496	chr4	99428512	G	C	0.0721	-0.4233	0.015258	2.155e-169	35559
Ferkingstad	11378_37_SYK_KSYK	rs72729008	chr9	90813267	A	G	0.14326	-0.1204	0.011458	7.904e-26	35559
Ferkingstad	11382_5_BLVRA_BIEA	rs1050916	chr7	43791281	G	A	0.01125	-0.2858	0.036866	9.016e-15	35559
Ferkingstad	11387_3_ATF6B_ATF6B	rs145410874	chr6	32116482	C	T	0.00532	-1.2225	0.052195	2.562e-121	35559
Ferkingstad	11388_75_WFDC2_HE4	rs2272953	chr20	45481252	C	T	0.07783	-0.1072	0.015087	1.199e-12	35559
Ferkingstad	11390_24_CA8_Carbonic_Anhydrase_VIII	rs35552143	chr8	60276129	A	G	0.4112	0.4196	0.006705	1e-200	35559
Ferkingstad	11424_4_FAH_FAAA	rs11555096	chr15	80180184	T	C	0.02305	-1.4758	0.021891	1e-200	35559
Ferkingstad	11428_31_PDLIM1_PDLI1	rs1328599	chr10	95294018	T	G	0.94248	-0.1318	0.017448	4.221e-14	35559
Ferkingstad	11441_11_PYGL_PYGL	rs768273303	chr14	50916642	G	C	0.00214	-1.308	0.080707	4.514e-59	35559
Ferkingstad	11480_1_ALDH3A1_Aldehyde_dehydrogenase__class_3	rs4646787	chr17	19745936	G	A	0.66419	0.1267	0.008277	6.817e-53	35559
Ferkingstad	11493_169_DYNLL2_DYL2	rs7225351	chr17	58077650	A	G	0.66541	0.0553	0.008561	1.05e-10	35559
Ferkingstad	11510_31_APOL1_Apo_L1	rs136148	chr22	36256885	T	C	0.7514	0.3517	0.007031	1e-200	35559
Ferkingstad	11514_196_CD59_CD59	rs831630	chr11	33721473	T	C	0.32663	-0.1828	0.008567	5.102e-101	35559
Ferkingstad	11516_7_FABP1_FABPL	rs2241883	chr2	88124547	C	T	0.32536	-0.1095	0.008602	4.039e-37	35559
Ferkingstad	11530_37_HMBS_HEM3	rs782474855	chr11	119085172	C	NA	0.06107	0.1528	0.017102	4.094e-19	35559
Ferkingstad	11530_37_HMBS_HEM3	rs1193300398	chr11	119085172	CTT	NA	0.01946	0.0572	0.03035	0.059477	35559
Ferkingstad	11530_37_HMBS_HEM3	rs1157360511	chr11	119085172	CTTTTT	NA	0.0088	0.0725	0.043287	0.093961	35559
Ferkingstad	11540_37_FOXO3_FOXO3A	rs3813498	chr6	108622962	T	C	0.81958	-0.0634	0.010373	9.835e-10	35559
Ferkingstad	11543_84_LIMA1_LIMA1	rs1271281854,rs35710007,rs397823842	chr12	50279005	CTTTTC	NA	0.57635	0.0602	0.008017	5.971e-14	35559
Ferkingstad	11547_84_MUSK_MUSK	rs3001148	chr9	110649450	A	NA	0.00126	0.0326	0.110148	0.767256	35559
Ferkingstad	11551_16_HMG20B_HM20B	rs11672541	chr19	3579863	C	A	0.10853	-0.1344	0.012863	1.487e-25	35559
Ferkingstad	11568_2_FKBP1B_FKB1B	rs55788848	chr2	24045851	T	C	0.20849	-0.2587	0.009962	1.093e-148	35559
Ferkingstad	11606_22_DNAJB6_DNJB6	rs12668458	chr7	157352780	C	T	0.43846	0.051	0.008081	2.768e-10	35559
Ferkingstad	11615_16_DAPP1_DAPP1	rs761822913	chr4	100139137	T	C	0.00347	-0.8486	0.066244	1.438e-37	35559
Ferkingstad	11616_9_HSF1_HSF1	rs369577549	chr8	144298609	AAAAGAAAGAAAAGAAAA	NA	0.50482	-0.0639	0.008129	3.811e-15	35559
Ferkingstad	11616_9_HSF1_HSF1	rs1352812232	chr8	144298609	AAAGAAAGAAAAG	NA	0.00262	-0.1099	0.07388	0.13687	35559
Ferkingstad	11616_9_HSF1_HSF1	rs1191415128	chr8	144298609	GAAAGAAAAGAAAA	NA	0.00095	0.0678	0.125333	0.588536	35559
Ferkingstad	11643_73_DTX3L_DTX3L	rs146362990	chr3	122357546	GATTTCCTTCTCTAT	NA	0.1404	0.0534	0.011431	2.99e-06	35559
Ferkingstad	11643_73_DTX3L_DTX3L	rs544989705	chr3	122357546	GATTTCCTTCTCTATTTTCCTTCTCTA	NA	0.00865	-0.3359	0.043536	1.206e-14	35559
Ferkingstad	11649_3_SMAP1_SMAP1	rs2842061	chr6	70634174	A	G	0.25515	-0.3223	0.009275	1e-200	35559
Ferkingstad	11656_110_EVL_EVL	rs75416067	chr14	99955092	CT	C	0.21217	0.2895	0.009672	7.811e-197	35559
Ferkingstad	11659_31_CLINT1_EPN4	rs62389053	chr5	157863943	T	C	0.14639	-0.076	0.011337	2.03e-11	35559
Ferkingstad	11681_8_AGFG1_NUPL	rs397826729,rs56147940	chr2	227576443	GC	G	0.64733	-0.0965	0.008292	2.642e-31	35559
Ferkingstad	11696_7_CRABP2_RABP2	rs79054104,rs79160890	chr1	156707877	A	AGAT	0.56933	0.2969	0.008288	1e-200	35559
Ferkingstad	11699_16_PTP4A2_TP4A2	rs147197357	chr1	31866749	G	A	0.00664	-0.3812	0.049118	8.437e-15	35559
Ferkingstad	11708_2_LCN1_LCN1	rs56307603	chr9	135514751	C	T	0.15132	-0.0917	0.011035	9.566e-17	35559
Ferkingstad	11969_5_S100A2_S100A2	rs75282796	chr1	153561364	C	T	0.01112	-0.414	0.038293	3.044e-27	35559
Ferkingstad	12008_3_CD7_CD7	rs3176831	chr17	82314615	T	C	0.04122	-0.4495	0.019569	9.294e-117	35559
Ferkingstad	12016_60_CBL_CBL	rs569014495	chr11	119206293	CGGCGGCGGCGGCGGCGGCAGCGGCGGCGG	NA	0.00254	0.1207	0.077345	0.11863	35559
Ferkingstad	12016_60_CBL_CBL	rs758396206	chr11	119206293	CGGCGGCGGCGGCGGCGGCGGCGGCGGCGGCGGCGGCGGCGGCGG	NA	0.01593	-0.256	0.03221	1.898e-15	35559
Ferkingstad	12016_60_CBL_CBL	rs556553625,rs758396206	chr11	119206293	CGGCGGCGGCGGCGGCGGCGGCGGCGGCGGCGGCGGCGGCGG	NA	0.00307	-0.1572	0.070425	0.025605	35559
Ferkingstad	12016_60_CBL_CBL	rs758396206,rs886047761	chr11	119206293	TGGCGGCGGCGGCGGCGGCGGCGGCGGCGGCGGCGGCGGCGGCGGCGG	NA	0.01598	-0.2927	0.032069	7.033e-20	35559
Ferkingstad	12016_60_CBL_CBL	rs878976124,rs886047761	chr11	119206293	TGGCGGCGGCGGCGGCGGCGGCGGCGGCGGCGG	NA	0.0039	-0.0155	0.05946	0.794341	35559
Ferkingstad	12016_60_CBL_CBL	rs7108857	chr11	119206293	TGGCGGCGGCGGCGGCGGCGGCGGCGGCGG	NA	0.23253	-0.0681	0.009448	5.683e-13	35559
Ferkingstad	12333_87_RPIA_RPIA	rs144706079	chr2	88769490	AATTATTTTTTTTTTTG	NA	0.10789	0.2088	0.012931	1.19e-58	35559
Ferkingstad	12334_25_SHMT1_cSHMT	rs651234	chr17	18365627	C	T	0.6621	0.6635	0.005986	1e-200	35559
Ferkingstad	12338_27_EGFLAM_EGFLA	rs113400125	chr5	38406149	T	C	0.02654	0.6904	0.026494	1.081e-149	35559
Ferkingstad	12343_14_ACAP2_CENB2	rs62285629	chr3	195469445	A	T	0.23426	-0.0584	0.00934	4.028e-10	35559
Ferkingstad	12347_29_CCM2_CCM2	rs6958168	chr7	44980215	G	T	0.17184	0.0729	0.01072	1.045e-11	35559
Ferkingstad	12348_46_SARS2_SYSM	rs7508539	chr19	38926800	A	G	0.64014	-0.1091	0.008178	1.341e-40	35559
Ferkingstad	12356_65_SRI_Sorcin	rs77500696	chr7	88311266	A	T	0.19499	0.1349	0.010203	6.575e-40	35559
Ferkingstad	12357_41_SNAP29_SNP29	rs192565874	chr22	20688681	A	G	0.10328	-0.1519	0.013067	3.091e-31	35559
Ferkingstad	12358_6_IGBP1_IGBP1	rs111257840	chrX	70182500	T	G	0.14398	-0.1201	0.010419	9.591e-31	35559
Ferkingstad	12361_102_RRAS2_RRAS2	rs35004543	chr11	14352674	GT	NA	0.99795	-0.7161	0.088318	5.136e-16	35559
Ferkingstad	12366_16_CRYGD_CRGD	rs34570682	chr2	208114213	A	G	0.33429	-0.1165	0.00837	4.913e-44	35559
Ferkingstad	12370_30_APOF_Apo_F	rs2020854	chr12	56349583	C	T	0.09012	-0.3125	0.014558	3.224e-102	35559
Ferkingstad	12381_26_CBR1_CBR1	rs536395967,rs869145162	chr21	36069956	G	NA	0.02596	-0.9203	0.024713	1e-200	35559
Ferkingstad	12382_2_DDX58_DDX58	rs35050877,rs397762911	chr9	32455676	AGAAAATG	NA	0.09871	-0.0083	0.013293	0.532366	35559
Ferkingstad	12382_2_DDX58_DDX58	rs969528809	chr9	32455676	ATAAAATGA	NA	0.00084	-0.1377	0.13648	0.313005	35559
Ferkingstad	12382_2_DDX58_DDX58	rs1133071	chr9	32455676	GGAAAATGA	NA	0.27468	0.1841	0.008928	1.788e-94	35559
Ferkingstad	12386_11_RNPEP_AMPB	rs6702334	chr1	201985696	A	T	0.3535	0.2934	0.008602	1e-200	35559
Ferkingstad	12387_7_PDLIM4_PDLI4	rs2292260	chr5	132271243	A	G	0.07367	-0.2589	0.015087	5.217e-66	35559
Ferkingstad	12395_86_DARS2_SYDM	rs141298312	chr1	173839539	A	G	0.02987	-0.2373	0.022813	2.424e-25	35559
Ferkingstad	12396_19_HIBCH_HIBCH	rs291466	chr2	190319749	G	A	0.61083	0.3279	0.00695	1e-200	35559
Ferkingstad	12401_3_STAMBPL1_STALP	rs1147604	chr10	88860435	A	G	0.49168	0.1047	0.008029	7.25e-39	35559
Ferkingstad	12408_333_RAB22A_RB22A	rs35933296	chr20	58427370	A	G	0.36378	-0.0648	0.008352	8.58e-15	35559
Ferkingstad	12411_60_MAX_MAX	rs8181938	chr14	65088994	G	A	0.39418	-0.1794	0.008181	1.417e-106	35559
Ferkingstad	12424_107_THYN1_THYN1	rs12278812	chr11	134252402	C	A	0.20778	-0.0627	0.009721	1.119e-10	35559
Ferkingstad	12428_2_LYPLAL1_LYPL1	rs75060212	chr1	219172269	G	T	0.1337	0.1481	0.011724	1.41e-36	35559
Ferkingstad	12432_23_CACYBP_CYBP	rs139185768,rs3085673	chr1	174814998	GTATTG	NA	0.09469	-0.2048	0.01375	3.59e-50	35559
Ferkingstad	12436_84_GSTO1_GST_omega_1	rs45596840	chr10	104268396	A	G	0.32183	-0.8222	0.005776	1e-200	35559
Ferkingstad	12437_18_ULK3_ULK3	rs936228	chr15	74839823	C	T	0.74344	-0.0869	0.009018	5.612e-22	35559
Ferkingstad	12438_127_MPG_3MG	rs2562156	chr16	74696	A	C	0.01971	0.281	0.028837	1.948e-22	35559
Ferkingstad	12445_50_ANKRD27_ANR27	rs17693106	chr19	32634149	G	A	0.59773	0.0522	0.00812	1.289e-10	35559
Ferkingstad	12449_16_PPIH_PPIH	rs187613485	chr1	42796364	G	C	0.00149	-1.3935	0.099382	1.149e-44	35559
Ferkingstad	12450_42_PMVK_PMVK	rs139248801	chr1	154929049	G	A	0.01701	-0.7013	0.03192	5.5e-107	35559
Ferkingstad	12457_10_ADI1_MTND	rs10179340	chr2	3519553	G	A	0.86784	-0.1107	0.011526	7.689e-22	35559
Ferkingstad	12459_13_PLEKHA1_PKHA1	rs10788274	chr10	122301287	A	G	0.5663	-0.282	0.007999	1e-200	35559
Ferkingstad	12469_19_MAPRE1_MARE1	rs20654	chr20	32830490	G	A	0.31162	-0.0669	0.008847	3.961e-14	35559
Ferkingstad	12475_48_CLIC5_CLIC5	rs35822882	chr6	45949262	T	G	0.02268	-1.1262	0.022309	1e-200	35559
Ferkingstad	12486_8_GLRX2_GLRX2	rs148212596	chr1	193105381	G	A	0.0324	0.7681	0.022642	1e-200	35559
Ferkingstad	12488_9_MCTS1_MCTS1	rs148197434	chrX	120606129	A	G	0.00364	0.5394	0.062679	7.58e-18	35559
Ferkingstad	12498_12_TAX1BP3_TX1B3	rs222773	chr17	3681164	G	C	0.53855	0.0891	0.008137	6.651e-28	35559
Ferkingstad	12508_9_VPS24_CHMP3	rs113655489	chr2	86576476	ACAAACAAACAAACAAACAAACAA	NA	0.00081	0.1236	0.146124	0.397631	35559
Ferkingstad	12508_9_VPS24_CHMP3	rs113655489,rs35902776,rs766849696	chr2	86576476	ACAAACAAACAAACAAACAA	NA	0.60774	0.0523	0.008297	2.915e-10	35559
Ferkingstad	12508_9_VPS24_CHMP3	rs1385710688	chr2	86576476	ACAAACAAAC	NA	0.00029	0.3954	0.268991	0.141579	35559
Ferkingstad	12522_6_RAD23B_RD23B	rs35827173	chr9	107327437	C	T	0.20991	0.0628	0.009727	1.072e-10	35559
Ferkingstad	12534_10_CALCOCO2_CACO2	rs71144529,rs775555287	chr17	48839353	C	NA	0.51765	0.0595	0.00804	1.361e-13	35559
Ferkingstad	12534_10_CALCOCO2_CACO2	rs1343662922	chr17	48839353	CTTTTTTT	NA	0.03311	0.0102	0.023103	0.658854	35559
Ferkingstad	12549_33_HPGDS_PTGD2	rs7657805	chr4	94352508	T	C	0.64716	0.462	0.006333	1e-200	35559
Ferkingstad	12558_3_UBASH3B_UBS3B	rs11218735	chr11	122652542	A	G	0.2852	-0.133	0.009022	3.48e-49	35559
Ferkingstad	12560_9_NT5C_NT5C	rs78625720	chr17	75144845	CATC	NA	0.02944	-1.4225	0.019821	1e-200	35559
Ferkingstad	12563_2_TNFAIP8_TFIP8	rs1035376	chr5	119312555	A	G	0.84076	0.2207	0.010836	3.325e-92	35559
Ferkingstad	12569_25_CCT5_TCP_1_epsilon	rs11557652	chr5	10256060	T	A	0.03389	-0.1539	0.0227	1.204e-11	35559
Ferkingstad	12571_14_ARL3_ARL3	rs8354	chr10	102676884	T	C	0.10626	-0.238	0.013261	4.988e-72	35559
Ferkingstad	12573_80_TRIM3_TRIM3	rs35717222	chr11	6462533	A	G	0.18311	-0.1392	0.01062	2.965e-39	35559
Ferkingstad	12575_30_MTHFD1_C1TC	rs757012830	chr14	64439116	C	T	0.00393	-1.0901	0.068937	2.536e-56	35559
Ferkingstad	12591_27_OPHN1_Oligophrenin_1	rs145954821	chrX	68443415	T	C	0.01729	-0.2083	0.027969	9.519e-14	35559
Ferkingstad	12594_5_GCA_GRAN	rs17783344	chr2	162352383	G	T	0.09544	-0.4329	0.013586	1e-200	35559
Ferkingstad	12612_37_PSMB1_PSB1	rs12717	chr6	170553212	C	G	0.45866	-0.3119	0.006959	1e-200	35559
Ferkingstad	12620_3_SEPT11_Septin_11	rs34274962,rs76319769,rs780149408	chr4	76967740	G	NA	0.52768	0.059	0.007941	1.085e-13	35559
Ferkingstad	12633_3_PTPN9_PTN9	rs111647176	chr15	75459420	A	G	0.27386	-0.0702	0.008811	1.626e-15	35559
Ferkingstad	12635_9_TRDMT1_TRDMT	rs35244566,rs397732669	chr10	17155007	GTC	NA	0.50045	-0.3092	0.006818	1e-200	35559
Ferkingstad	12637_7_CRAT_CACP	rs6478861	chr9	129092024	T	C	0.68387	0.0903	0.008624	1.18e-25	35559
Ferkingstad	12641_3_INPP5B_I5P2	rs139477416	chr1	37827489	G	C	0.12529	-0.3047	0.012348	1.957e-134	35559
Ferkingstad	12643_4_ARRB1_ARRB1	rs504683	chr11	75340189	G	A	0.30388	0.0805	0.008855	9.778e-20	35559
Ferkingstad	12646_2_RPE_RPE	rs2723211	chr2	210015768	A	G	0.43273	0.0757	0.008089	8.096e-21	35559
Ferkingstad	12656_1_KLC1_KLC1	rs12884809	chr14	103628983	A	G	0.3519	0.0886	0.008655	1.36e-24	35559
Ferkingstad	12659_13_OLA1_GTPB9	rs142397557	chr2	174087028	TTTCTTTTTTTTTTTTTG	NA	0.19111	0.1726	0.010279	2.851e-63	35559
Ferkingstad	12662_82_ECH1_ECH1	rs2229259	chr19	38816463	T	C	0.08774	0.4478	0.013793	1e-200	35559
Ferkingstad	12670_15_RAD1_RAD1	rs2308957	chr5	34911779	T	C	0.00832	-0.2863	0.043021	2.835e-11	35559
Ferkingstad	12675_14_DARS_SYDC	rs536313922	chr2	135075921	TCTTTTTTTG	NA	0.00042	-0.1263	0.1884	0.502614	35559
Ferkingstad	12677_164_FLII_FLII	rs138865936	chr17	18261705	T	C	0.02428	0.2508	0.026195	1.024e-21	35559
Ferkingstad	12682_5_CCBL2_KAT3	rs12729558	chr1	88937277	G	C	0.49448	-0.2861	0.008091	1e-200	35559
Ferkingstad	12684_5_SCIN_ADSV	rs372478619	chr7	12566635	GTTTTGTTTTGTTTTGTTTTGTTTTTTTGAGACGGA	NA	0.01077	0.0563	0.038265	0.141207	35559
Ferkingstad	12686_15_MPST_THTM	rs201058049	chr22	37024382	T	G	0.01113	-0.8295	0.038283	4.175e-104	35559
Ferkingstad	12687_2_DECR1_DECR	rs182522126	chr8	89957162	A	G	0.00421	-0.8178	0.062312	2.393e-39	35559
Ferkingstad	12689_56_ARPC1B_ARC1B	rs1273491514	chr7	99302296	TCTCAAAAAAAAAAAAATATATACACACACACACACACACACACACACACACACAT	NA	0.00087	-0.1495	0.139288	0.283128	35559
Ferkingstad	12703_6_NEK7_NEK7	rs17584278	chr1	198135628	G	A	0.00376	-0.6967	0.064373	2.684e-27	35559
Ferkingstad	12714_38_AP1G2_AP1G2	rs61555275,rs71425097	chr14	23567707	ACAGCGGCAGCGGCAGCGA	NA	0.07972	-0.2494	0.014784	7.487e-64	35559
Ferkingstad	12714_38_AP1G2_AP1G2	rs777965244	chr14	23567707	G	NA	0.00091	0.1773	0.138918	0.201851	35559
Ferkingstad	12718_43_PIN4_PIN4	rs6525591	chrX	72186451	C	T	0.28476	-0.2625	0.007972	1e-200	35559
Ferkingstad	12727_7_PTGFRN_FPRP	rs4233450	chr1	116947639	T	G	0.82563	0.838	0.007873	1e-200	35559
Ferkingstad	12731_12_PLEKHA7_PKHA7	rs446518	chr11	16856962	T	C	0.10607	0.658	0.010887	1e-200	35559
Ferkingstad	12747_89_RBM3_RBM3	rs58350599	chrX	48645439	TGGGGGGGT	NA	0.30939	0.0207	0.007913	0.008897	35559
Ferkingstad	12747_89_RBM3_RBM3	rs183527473	chrX	48645439	TTGGGGGGG	NA	0.00017	-0.3625	0.285904	0.20483	35559
Ferkingstad	12764_3_ELMO1_ELMO1	rs7782999	chr7	37407090	T	A	0.18282	-0.1054	0.010171	3.676e-25	35559
Ferkingstad	12786_61_GPCPD1_GDE5	rs6133228	chr20	5571430	G	A	0.6113	-0.0704	0.008325	2.759e-17	35559
Ferkingstad	12799_65_DNAJC27_DJC27	rs61191726	chr2	24936720	CACACACACAT	NA	0.00196	0.1449	0.086298	0.093141	35559
Ferkingstad	12799_65_DNAJC27_DJC27	rs397741617,rs528548568,rs61191726,rs774642610	chr2	24936720	CACACAT	NA	0.26747	-0.0292	0.00885	0.0009686	35559
Ferkingstad	12799_65_DNAJC27_DJC27	rs1423811445	chr2	24936720	CACATTTAT	NA	0.00044	0.022	0.184468	0.905068	35559
Ferkingstad	12799_65_DNAJC27_DJC27	rs559164825,rs773478887	chr2	24936720	CAT	NA	0.14166	0.0698	0.011169	4.119e-10	35559
Ferkingstad	12812_25_ACYP2_ACYP2	rs7559380	chr2	54129660	T	A	0.44987	-0.2198	0.008009	8.437e-166	35559
Ferkingstad	12820_1_GRAP_GRAP	rs764640269	chr17	19092836	C	T	0.06957	-0.1005	0.015942	2.895e-10	35559
Ferkingstad	12851_5_POLM_DPOLM	rs142059440	chr7	44074256	C	G	0.02101	0.4602	0.027837	2.169e-61	35559
Ferkingstad	12855_16_CASS4_CT032	rs2426628	chr20	56451641	A	G	0.07908	-0.105	0.014851	1.548e-12	35559
Ferkingstad	12859_33_ECI2_PECI	rs634698	chr6	4114013	A	T	0.29039	-0.4295	0.007269	1e-200	35559
Ferkingstad	12893_159_IFI16_IP16	rs856053	chr1	159031714	A	G	0.83245	0.0685	0.010729	1.722e-10	35559
Ferkingstad	12940_35_ALDH3B1_AL3B1	rs475325	chr11	68017592	T	C	0.23363	0.135	0.009383	6.226e-47	35559
Ferkingstad	12975_11_KRT20_Keratin_20	rs4796667	chr17	41522464	C	T	0.64081	-0.0586	0.008303	1.691e-12	35559
Ferkingstad	13044_5_TSG101_TS101	rs1395319	chr11	18526636	G	T	0.32694	0.1473	0.008558	2.14e-66	35559
Ferkingstad	13059_33_RFK_RIFK	rs71501386	chr9	76702619	GAATGAATGAATGAATGAATGAATG	NA	0.00155	-0.0962	0.098973	0.331061	35559
Ferkingstad	13059_33_RFK_RIFK	rs59841123,rs71501386	chr9	76702619	GAATGAATGAATGAATG	NA	0.31171	0.0589	0.008613	8.012e-12	35559
Ferkingstad	13062_4_GMFG_GMFG	rs543085239	chr19	39336104	A	C	0.00533	-0.3531	0.055858	2.592e-10	35559
Ferkingstad	13068_139_CCS_CCS	rs498045	chr11	66595526	G	A	0.55162	0.1131	0.008053	8.306e-45	35559
Ferkingstad	13082_9_UNC45A_UN45A	rs149968734	chr15	91165518	T	A	0.00112	-0.8395	0.121984	5.899e-12	35559
Ferkingstad	13088_397_BTC_BTC	rs28549760	chr4	74794307	C	A	0.09469	-0.2084	0.013673	1.863e-52	35559
Ferkingstad	13090_17_S100A6_S100A6	rs146161869	chr1	153535333	G	A	0.01509	-0.4467	0.033725	4.807e-40	35559
Ferkingstad	13093_6_SECTM1_SECTM1	rs4789763	chr17	82331408	G	A	0.48038	0.1848	0.008118	1.012e-114	35559
Ferkingstad	13102_1_FAM3D_FAM3D	rs12493131	chr3	58664251	G	T	0.92527	0.4529	0.015112	2.474e-197	35559
Ferkingstad	13107_9_LYPD3_LYPD3	rs35681564	chr19	43455236	A	G	0.20779	0.1413	0.010056	7.508e-45	35559
Ferkingstad	13112_179_FSTL1_FSTL1	rs1147707	chr3	120450401	T	C	0.37455	-0.1507	0.008488	1.602e-70	35559
Ferkingstad	13113_7_SPP1_Osteopontin	rs139555315	chr4	87980045	A	G	0.0066	-1.094	0.048085	1.398e-114	35559
Ferkingstad	13116_25_CD177_CD177	rs199806191	chr19	43322950	G	GC	0.01383	2.0869	0.020827	1e-200	35559
Ferkingstad	13118_5_SMOC1_SMOC1	rs1958078	chr14	69888141	C	A	0.86723	0.2457	0.012014	5.873e-93	35559
Ferkingstad	13122_19_FLRT2_FLRT2	rs36101989	chr14	85343485	T	G	0.28128	-0.2728	0.009053	1.787e-199	35559
Ferkingstad	13124_20_ISLR2_ISLR2	rs561185212	chr15	74177102	AGCTGGGGGCAGGAGCCTGGGGTG	NA	0.23852	0.2144	0.009588	9.194e-111	35559
Ferkingstad	13126_52_DSC2_DSC2	rs1355089153	chr18	31101527	CTCCCGCCCCGGCGCACTCCCGCCCCGGCGCACTCCCGCCCCGGCGCACTCCGACCCCGGCGCACTCCC	NA	0.20171	-0.2367	0.010101	1.913e-121	35559
Ferkingstad	13126_52_DSC2_DSC2	rs879551054	chr18	31101527	CTCCCGCCCCGGCGCACTCCCGCCCCGGCGCACTCCGACCCCGGCGCACTCCGACCCCGGCGCACTCCC	NA	0.00324	-0.0356	0.069369	0.607814	35559
Ferkingstad	13126_52_DSC2_DSC2	rs1443442800	chr18	31101527	CTCCCGCCCCGGCGCACTCCGACCCCGGCGCACTCCC	NA	0.00733	0.1121	0.048492	0.020794	35559
Ferkingstad	13130_150_HK2_HXK2	rs3732298	chr2	74891195	G	A	0.01983	0.2583	0.028544	1.442e-19	35559
Ferkingstad	13132_14_SEMA5A_SEM5A	rs56015217	chr5	9547721	T	C	0.08748	1.415	0.009641	1e-200	35559
Ferkingstad	13133_73_LTBP4_LTBP4	rs199875504	chr19	40608501	T	C	0.0023	0.9138	0.083519	7.317e-28	35559
Ferkingstad	13381_49_B4GALT1_B4GT1	rs7019909	chr9	33113324	T	C	0.09232	0.2948	0.01396	5.426e-99	35559
Ferkingstad	13388_57_PCSK1_NEC1	rs6235	chr5	96393194	G	C	0.28591	-0.8815	0.006031	1e-200	35559
Ferkingstad	13397_88_DEFB4A_HBD_2	rs138861652	chr8	7462743	A	G	0.23079	0.2778	0.010841	8.079e-145	35559
Ferkingstad	13405_61_SPINK2_ISK2	rs11941268	chr4	56823077	T	C	0.02611	0.807	0.025237	1e-200	35559
Ferkingstad	13423_94_FAM213A_CJ058	rs10887871	chr10	80436305	G	A	0.44209	-0.0928	0.007874	4.59e-32	35559
Ferkingstad	13434_172_PARVA_PARVA	rs4757383	chr11	12350362	A	NA	0.9101	-0.1458	0.014288	1.897e-24	35559
Ferkingstad	13438_115_CHRD_CHRD	rs34095724	chr3	184381262	T	C	0.05375	-0.1876	0.017478	7.1e-27	35559
Ferkingstad	13450_49_USP8_UBP8	rs62019074	chr15	50433826	C	T	0.16136	0.1017	0.010906	1.104e-20	35559
Ferkingstad	13460_4_CHAD_CHAD	rs144030994	chr17	50465353	T	G	0.00353	-0.6923	0.075739	6.212e-20	35559
Ferkingstad	13463_1_PXDN_PXDN	rs73182757	chr2	1744125	G	A	0.28172	0.1467	0.009093	1.468e-58	35559
Ferkingstad	13465_5_RCAN1_CCP1	rs192726277	chr21	34560626	C	T	0.01249	0.3049	0.036258	4.13e-17	35559
Ferkingstad	13472_35_HDHD2_HDHD2	rs1309989800	chr18	47139301	TACAAA	NA	0.06368	0.4583	0.016292	4.089e-174	35559
Ferkingstad	13472_35_HDHD2_HDHD2	rs34392866	chr18	47139301	TACA	NA	0.46502	-0.0246	0.00803	0.002188	35559
Ferkingstad	13473_55_ITPKA_IP3KA	rs316617	chr15	41503702	C	T	0.37787	0.0715	0.008245	4.243e-18	35559
Ferkingstad	13481_24_TCEA2_TCEA2	rs6011275	chr20	64068875	G	T	0.32709	-0.1453	0.008573	1.986e-64	35559
Ferkingstad	13488_3_ARFIP1_ARFP1	rs4619875	chr4	152779978	T	C	0.37238	0.2215	0.008385	8.572e-154	35559
Ferkingstad	13499_30_F8_Coagulation_Factor_VIII	rs5945273	chrX	155013426	C	T	0.22719	-0.0601	0.008747	6.377e-12	35559
Ferkingstad	13519_112_ARHGEF25_ARHGP	rs10437954	chr12	57610139	A	G	0.88442	-0.1808	0.012343	1.394e-48	35559
Ferkingstad	13534_20_MYOM2_MYOM2	rs117165873	chr8	2106287	G	A	0.01374	-0.3193	0.035441	2.073e-19	35559
Ferkingstad	13536_56_POLI_POLI	rs117050326	chr18	54237200	C	G	0.0172	-0.2678	0.03126	1.063e-17	35559
Ferkingstad	13544_9_HMHA1_HMHA1	rs7251797	chr19	1077986	G	A	0.3543	0.1293	0.008549	1.121e-51	35559
Ferkingstad	13552_7_SWAP70_SWP70	rs415895	chr11	9748015	G	C	0.64493	-0.4229	0.006754	1e-200	35559
Ferkingstad	13578_98_ABLIM3_ABLM3	rs114464628	chr5	149154161	A	G	0.0443	-0.2726	0.019185	8.052e-46	35559
Ferkingstad	13580_2_UAP1_Sperm_associated_antigen_2	rs61747497	chr1	162590492	T	C	0.0025	0.7686	0.079235	3.006e-22	35559
Ferkingstad	13590_1_REXO2_ORN	rs145909170,rs397972186	chr11	114445054	GA	G	0.12511	-0.1551	0.012149	2.539e-37	35559
Ferkingstad	13603_7_RFESD_RFESD	rs75044039	chr5	95628553	C	G	0.03692	-0.1607	0.021283	4.326e-14	35559
Ferkingstad	13618_15_MAD1L1_MD1L1	rs143579216	chr7	2225428	A	G	0.00322	0.5438	0.072219	5.079e-14	35559
Ferkingstad	13621_31_AP2A2_AP2A2	rs7482118	chr11	972603	G	A	0.65763	-0.0619	0.008322	1.018e-13	35559
Ferkingstad	13622_16_PPP2R5A_2A5A	rs529646532,rs869237255	chr1	212163086	CT	NA	0.06129	-0.009	0.016709	0.590147	35559
Ferkingstad	13622_16_PPP2R5A_2A5A	rs3070970,rs759924378	chr1	212163086	CTTT	NA	0.15011	0.0817	0.011335	5.693e-13	35559
Ferkingstad	13632_10_ZYX_Zyxin	rs12539742	chr7	143490004	A	G	0.29322	0.0789	0.008911	8.443e-19	35559
Ferkingstad	13634_209_PIR_PIR	rs925653	chrX	15490906	G	A	0.68786	0.4071	0.006011	1e-200	35559
Ferkingstad	13642_90_IFIT3_CIG49	rs10509571	chr10	89332801	A	T	0.26379	-0.0904	0.008977	7.449e-24	35559
Ferkingstad	13657_2_PNKP_PNKP	rs190357958	chr19	49860889	A	G	0.00371	-0.9329	0.066893	3.325e-44	35559
Ferkingstad	13666_222_CA10_Carbonic_Anhydrase_X	rs117399000	chr17	52136371	A	G	0.02683	-0.5585	0.025551	6.546e-106	35559
Ferkingstad	13669_6_FGFR3_FGFR_3	rs2403274	chr4	1752788	G	C	0.25262	-0.1729	0.009303	4.252e-77	35559
Ferkingstad	13671_40_ELANE_Elastase	rs10409474	chr19	850733	G	C	0.13906	0.4542	0.01245	1e-200	35559
Ferkingstad	13682_47_CSF1R_M_CSF_R	rs56048668	chr5	150080979	C	A	0.00226	-1.465	0.087151	2.068e-63	35559
Ferkingstad	13686_2_IL5RA_IL_5_Ra	rs77400868	chr3	3109280	G	A	0.1532	0.5478	0.008559	1e-200	35559
Ferkingstad	13692_154_WISP1_WISP_1	rs7843546	chr8	133186058	T	C	0.26961	0.5249	0.006952	1e-200	35559
Ferkingstad	13697_51_GPD1_GPDA	rs199902085	chr12	50106334	C	T	0.00122	-0.9181	0.102568	3.519e-19	35559
Ferkingstad	13704_5_HMGCS2_HMCS2	rs10923900	chr1	119775000	GAC	NA	0.43025	-0.0548	0.00815	1.772e-11	35559
Ferkingstad	13720_95_PRTN3_Proteinase_3	rs6510982	chr19	845535	G	C	0.75479	0.4917	0.00758	1e-200	35559
Ferkingstad	13733_5_IL12B_IL_12_p40	rs10043720	chr5	159340325	G	A	0.68488	0.409	0.006907	1e-200	35559
Ferkingstad	13740_51_FRZB_sFRP_3	rs288326	chr2	182838608	A	G	0.08446	0.5349	0.014929	1e-200	35559
Ferkingstad	13929_27_CROT_OCTC	rs31658	chr7	87409825	C	T	0.86392	0.5532	0.009552	1e-200	35559
Ferkingstad	13930_3_APOBEC3G_ABC3G	rs6519166	chr22	39076172	A	C	0.63728	-0.119	0.008596	1.395e-43	35559
Ferkingstad	13931_22_PSMD9_PSMD9	rs10770186	chr12	121923506	G	A	0.54934	0.1173	0.008011	1.495e-48	35559
Ferkingstad	13934_3_MCF2L_MCF2L	rs3011487	chr13	112924107	C	T	0.48488	0.2089	0.008039	6.985e-149	35559
Ferkingstad	13939_14_UGP2_UGPA1	rs752147211	chr2	63966130	T	A	0.00099	1.6503	0.135636	4.651e-34	35559
Ferkingstad	13943_38_DPY30_DPY30	rs221205	chr2	31861868	C	T	0.88482	-0.1017	0.0123	1.358e-16	35559
Ferkingstad	13944_3_SULT1A3_SULT_1A3	rs148788997	chr16	30311847	C	G	0.14089	0.1957	0.011976	5.062e-60	35559
Ferkingstad	13947_371_NUDT12_NUD12	rs1491247487	chr5	103556289	T	NA	0.0006	-0.5827	0.151663	0.000122	35559
Ferkingstad	13947_371_NUDT12_NUD12	rs143398928	chr5	103556289	TT	NA	0.14685	-0.509	0.009437	1e-200	35559
Ferkingstad	13954_9_GNPNAT1_GNA1	rs200792178,rs201379520	chr14	52807986	TTATA	T	0.10512	0.106	0.013243	1.2e-15	35559
Ferkingstad	13969_24_KPNA6_IMA7	rs140904849	chr1	31977167	T	C	0.02788	0.1795	0.024067	8.761e-14	35559
Ferkingstad	13972_4_HSD17B14_DHB14	rs35299026	chr19	48815123	A	G	0.0538	-0.1574	0.017551	3.014e-19	35559
Ferkingstad	13973_62_TTL_TTL	rs10194022	chr2	112479304	T	C	0.15912	0.0803	0.011121	5.179e-13	35559
Ferkingstad	13982_33_RGS18_RGS18	rs4495675	chr1	192158507	G	T	0.54964	-0.0548	0.008013	7.975e-12	35559
Ferkingstad	13983_27_CRYZ_QOR	rs28796647	chr1	74726654	G	C	0.52621	-0.7176	0.005248	1e-200	35559
Ferkingstad	13986_6_LANCL1_LANC1	rs141236725	chr2	210441382	T	C	0.00409	-1.1938	0.061118	5.79e-85	35559
Ferkingstad	13988_67_NMRAL1_NMRL1	rs11557236	chr16	4469438	A	G	0.10184	-0.8722	0.010596	1e-200	35559
Ferkingstad	13998_26_ADSSL1_PURA1	rs10142660	chr14	104759283	T	G	0.13266	0.3675	0.01209	1e-200	35559
Ferkingstad	14006_36_GNMT_GNMT	rs6940814	chr6	42957194	G	A	0.6292	-0.2195	0.0081	1.033e-161	35559
Ferkingstad	14009_65_TNFAIP3_TNFAIP3	rs5029937	chr6	137874014	T	G	0.02537	0.3992	0.025471	2.325e-55	35559
Ferkingstad	14048_7_IL1RAP_IL_1_R_AcP	rs2885373	chr3	190628679	C	T	0.85728	-1.417	0.006731	1e-200	35559
Ferkingstad	14066_49_MAGI2_MAGI2	rs59169073	chr7	79428907	C	T	0.15967	0.5676	0.008842	1e-200	35559
Ferkingstad	14067_6_PKP2_PKP2	rs9919823	chr12	32821677	C	T	0.04516	0.243	0.019309	2.565e-36	35559
Ferkingstad	14076_74_CST4_Cystatin_S	rs8121100	chr20	23695261	G	A	0.09341	-0.4338	0.013883	1e-200	35559
Ferkingstad	14079_14_IL18R1_IL_18_Ra	rs2041740	chr2	102373262	ATGGAATACTATG	NA	0.81452	-0.7108	0.007506	1e-200	35559
Ferkingstad	14090_23_DEF6_DEFI6	rs1345405475	chr6	35276791	GTTTT	NA	0.0232	-0.5176	0.027194	8.971e-81	35559
Ferkingstad	14091_42_CBR3_Carbonyl_reductase_3	rs34285668	chr21	36138777	A	NA	0.08246	-0.003	0.015065	0.842151	35559
Ferkingstad	14100_63_C1QC_C1QC	rs78865058	chr1	22617716	A	G	0.04341	1.0336	0.015466	1e-200	35559
Ferkingstad	14101_2_CNTFR_CNTFR_alpha	rs10972159	chr9	34593088	A	G	0.0311	-0.5581	0.023487	8.276e-125	35559
Ferkingstad	14107_1_MTHFS_MTHFS	rs11632589	chr15	79900425	C	T	0.37229	-0.3625	0.006841	1e-200	35559
Ferkingstad	14112_40_RELT_RELT	rs12293998	chr11	73302315	G	T	0.28804	0.0602	0.008873	1.164e-11	35559
Ferkingstad	14116_129_S100A4_S100A4	rs41265162	chr1	153547662	T	C	0.04463	0.2134	0.019763	3.515e-27	35559
Ferkingstad	14131_37_EFNB2_EFNB2	rs113216595	chr13	106637559	GGGCTC	G	0.12727	0.0912	0.012165	6.524e-14	35559
Ferkingstad	14133_93_IL1R2_IL_1_sRII	rs4851521	chr2	101993894	T	C	0.42895	-0.4144	0.006314	1e-200	35559
Ferkingstad	14134_49_AMIGO2_AMGO2	rs143988788	chr12	47133506	A	G	0.00109	-1.6737	0.122965	3.435e-42	35559
Ferkingstad	14136_234_CD93_C1QR1	rs1000470607	chr20	23084967	T	C	0.00036	-1.6337	0.195387	6.2e-17	35559
Ferkingstad	14151_4_ISG15_UCRP	rs1921	chr1	1014228	A	G	0.45719	0.3075	0.00698	1e-200	35559
Ferkingstad	14153_8_EFNA3_Ephrin_A3	rs67333363	chr1	155085570	G	A	0.08685	-0.0914	0.014312	1.698e-10	35559
Ferkingstad	14158_17_ANXA5_Annexin_V	rs9995591	chr4	121694605	A	G	0.06845	0.2632	0.015567	3.965e-64	35559
Ferkingstad	14208_3_RBP7_RET7	rs1220424	chr1	9941922	A	T	0.7808	0.1295	0.009703	1.252e-40	35559
Ferkingstad	14273_19_PREP_PPCE	rs12192369	chr6	105329503	G	A	0.14036	-0.2123	0.011446	8.558e-77	35559
Ferkingstad	14618_26_VOPP1_ECOP	rs117042408	chr7	55555698	A	G	0.01999	-0.2917	0.029687	8.725e-23	35559
Ferkingstad	14623_26_SUMO3_SUMO3	rs741949	chr21	44836982	G	T	0.24797	0.0648	0.009299	3.208e-12	35559
Ferkingstad	14636_25_HRSP12_Ribonuclease_UK114	rs1428487851,rs1491429221,rs533211470,rs539463475,rs548100290,rs869250459	chr8	98108855	AAAAA	NA	0.09633	-0.0106	0.013922	0.446435	35559
Ferkingstad	14655_1_DNAJC17_DJC17	rs117485355	chr15	40774427	G	NA	0.00655	-1.0797	0.048742	1.01e-108	35559
Ferkingstad	14688_6_PTPN7_PTN7	rs147176673	chr1	202160077	A	G	0.00929	-0.3595	0.041306	3.221e-18	35559
Ferkingstad	14747_9_CRLF1_CRLF1	rs7246833	chr19	18604272	G	C	0.21574	0.264	0.009675	6.231e-164	35559
Ferkingstad	15298_199_NETO1_NETO1	rs7242889	chr18	73564150	G	C	0.18006	0.0673	0.01027	5.629e-11	35559
Ferkingstad	15300_66_CCDC134_CC134	rs5996067	chr22	41802533	A	G	0.39515	0.1038	0.008152	3.861e-37	35559
Ferkingstad	15304_1_REG3A_PAP1	rs4459759	chr2	79170240	A	NA	0.04659	0.4073	0.019734	1.223e-94	35559
Ferkingstad	15305_7_SCGN_Secretagogin	rs10713750	chr6	25665836	A	NA	0.28699	-0.0755	0.008765	7.077e-18	35559
Ferkingstad	15305_7_SCGN_Secretagogin	rs1229427955	chr6	25665836	ATT	NA	0.00036	-0.3011	0.2198	0.170724	35559
Ferkingstad	15308_108_VWC2_VWC2	rs377674383,rs5884130	chr7	49779055	GACAG	NA	0.30638	-0.0289	0.00909	0.001476	35559
Ferkingstad	15308_108_VWC2_VWC2	rs372065719,rs58968931,rs753121049	chr7	49779055	GAGAG	NA	0.16403	-0.4039	0.011122	1e-200	35559
Ferkingstad	15316_262_TXNL4B_TXN4B	rs116891509	chr16	72071661	T	C	0.07588	0.2501	0.015269	2.662e-60	35559
Ferkingstad	15321_8_CPLX2_CPLX2	rs76735111	chr5	175960203	T	A	0.78573	-0.0637	0.009714	5.479e-11	35559
Ferkingstad	15322_35_CRADD_CRADD	rs60169972	chr12	93837506	C	G	0.17309	-0.0682	0.010543	9.892e-11	35559
Ferkingstad	15324_58_FTL_Ferritin_light_chain	rs192331981	chr19	48927887	T	G	0.01687	0.2648	0.032712	5.726e-16	35559
Ferkingstad	15326_64_GBP1_GBP1	rs150057659	chr1	89054714	A	C	0.0049	-1.7904	0.058088	1e-200	35559
Ferkingstad	15336_7_SELM_SELM	rs1261656720	chr22	31788276	TTTTTTTTTTTT	NA	0.04378	-0.0255	0.019627	0.193869	35559
Ferkingstad	15336_7_SELM_SELM	rs1475709867	chr22	31788276	TTTTTTTTTTTTT	NA	0.04426	-0.0286	0.019767	0.147939	35559
Ferkingstad	15339_32_CFL2_COF2	rs6571678	chr14	34716139	G	A	0.14396	0.1538	0.0111	1.18e-43	35559
Ferkingstad	15367_38_BPIFB1_LPLC1	rs143335554	chr20	33107241	GGAAAGA	NA	0.00258	0.1618	0.089293	0.069985	35559
Ferkingstad	15367_38_BPIFB1_LPLC1	rs143335554,rs71190891	chr20	33107241	GGAAGGAAAGA	NA	0.57556	-0.3597	0.006247	1e-200	35559
Ferkingstad	15368_3_BMPER_BMPER	rs1162040187,rs68052795,rs72248195	chr7	34153398	GTA	G	0.27086	-0.1219	0.009203	4.763e-40	35559
Ferkingstad	15375_49_CPB1_Carboxypeptidase_B1	rs2291671	chr3	148840660	A	G	0.24902	0.2378	0.009702	1.141e-132	35559
Ferkingstad	15384_15_KL_KLOTHO	rs10467359	chr13	32955126	G	A	0.04031	-0.3185	0.020808	6.897e-53	35559
Ferkingstad	15385_116_FABP2_FABP2	rs397750996,rs57533347,rs778687516	chr4	119351161	AG	NA	0.37316	0.3665	0.006185	1e-200	35559
Ferkingstad	15385_116_FABP2_FABP2	rs4834772	chr4	119351161	G	NA	0.34649	0.3231	0.006344	1e-200	35559
Ferkingstad	15386_7_FABP4_FABPA	rs72684453	chr8	81453981	AA	NA	0.07645	0.053	0.015741	0.0007601	35559
Ferkingstad	15386_7_FABP4_FABPA	rs16909138	chr8	81453981	TT	NA	0.14423	-0.1027	0.011813	3.512e-18	35559
Ferkingstad	15387_44_NRP2_Neuropilin_2	rs150064130	chr2	205727919	T	C	0.00558	-0.9633	0.055522	1.98e-67	35559
Ferkingstad	15391_114_GAS6_GAS_6	rs6602909	chr13	113849020	C	T	0.33811	-0.26	0.008718	1.919e-195	35559
Ferkingstad	15394_79_UNC5B_UNC5B	rs117120062	chr10	71302386	T	C	0.01856	0.4764	0.030973	2.195e-53	35559
Ferkingstad	15398_2_GFER_HERV1	rs3743846	chr16	2000345	G	A	0.20389	-0.0661	0.010033	4.445e-11	35559
Ferkingstad	15414_316_LDHA_LDHA	rs111294128	chr11	18390175	G	A	0.02752	-0.2458	0.024639	1.941e-23	35559
Ferkingstad	15417_3_SERPINB5_Maspin	rs7244879	chr18	63484141	G	A	0.62777	0.1391	0.008298	4.567e-63	35559
Ferkingstad	15426_5_NEU1_NEUR1	rs756193196	chr6	31862092	A	G	0.00048	-2.0251	0.200319	5.02e-24	35559
Ferkingstad	15427_35_LOXL3_LOXL3	rs17010021	chr2	74534412	A	T	0.05903	-0.2156	0.016993	6.956e-37	35559
Ferkingstad	15431_31_OTC_OTCase	rs1800328	chrX	38408967	G	A	0.0437	-0.3986	0.018345	1.116e-104	35559
Ferkingstad	15435_4_PNP_PNP	rs1049564	chr14	20472447	A	G	0.16518	-0.1732	0.011018	1.117e-55	35559
Ferkingstad	15440_57_PCSK2_NEC2	rs6044699	chr20	17249972	G	A	0.50142	-0.0819	0.007998	1.317e-24	35559
Ferkingstad	15441_6_GM2A_SAP3	rs72794132	chr5	151239432	T	C	0.16385	0.3212	0.011098	3.468e-184	35559
Ferkingstad	15444_45_SERPINB4_SCCA2	rs12953909	chr18	63655746	T	C	0.02404	0.7814	0.025481	1e-200	35559
Ferkingstad	15447_45_SORD_Sorbitol_dehydrogenase	rs72722045	chr15	44966007	T	A	0.15854	0.2954	0.011218	7.868e-153	35559
Ferkingstad	15452_5_NT5E_5__Nucleotidase	rs34855753,rs397888796	chr6	85387970	CT	NA	0.39872	0.1673	0.00833	1.014e-89	35559
Ferkingstad	15452_5_NT5E_5__Nucleotidase	rs1328552763	chr6	85387970	CTTT	NA	0.11808	-0.5324	0.010135	1e-200	35559
Ferkingstad	15462_28_CD8A_CD8A	rs3020726	chr2	86789383	G	A	0.19565	0.4011	0.007976	1e-200	35559
Ferkingstad	15466_30_COL9A1_CO9A1	rs543674622	chr6	70277423	G	A	0.0035	1.2107	0.067545	7.631e-72	35559
Ferkingstad	15470_11_HEXB_Hexosaminidase_B	rs13164140	chr5	74734513	A	G	0.27062	0.2719	0.009084	7.905e-197	35559
Ferkingstad	15471_29_PNLIPRP2_LIPR2	rs7910135	chr10	116638535	A	C	0.52744	1.0139	0.004951	1e-200	35559
Ferkingstad	15476_6_REG3G_REG3G	rs369967	chr2	79026024	G	A	0.21909	0.54	0.007317	1e-200	35559
Ferkingstad	15480_2_VNN2_VNN2	rs9493423	chr6	132752994	A	G	0.30394	-0.6991	0.006017	1e-200	35559
Ferkingstad	15482_12_A2ML1_A2ML1	rs1558526	chr12	8857224	A	G	0.21815	-0.2436	0.009618	1.567e-141	35559
Ferkingstad	15483_377_AGRN_Agrin	rs4970394	chr1	1027511	T	C	0.54118	0.239	0.008395	2.88e-178	35559
Ferkingstad	15486_126_AOC1_ABP1	rs10452848	chr7	150826456	G	A	0.49521	0.7612	0.00514	1e-200	35559
Ferkingstad	15491_20_CD248_CD248	rs182547559	chr11	66314744	G	C	0.0013	-0.8279	0.1085	2.34e-14	35559
Ferkingstad	15494_11_FGFBP1_FGFP1	rs1286742189	chr4	15964481	TTTGTTTG	NA	0.00721	-0.0734	0.047305	0.120747	35559
Ferkingstad	15494_11_FGFBP1_FGFP1	rs141147310	chr4	15964481	TTTTGTTTGTTTGTTTGTTTG	NA	0.00187	-0.1851	0.099501	0.062845	35559
Ferkingstad	15494_11_FGFBP1_FGFP1	rs141147310,rs78043269	chr4	15964481	TTTTGTTTGTTTGTTTG	NA	0.35339	-0.0347	0.008609	5.557e-05	35559
Ferkingstad	15494_11_FGFBP1_FGFP1	rs113576692,rs59932771,rs199980814	chr4	15964481	TTTTTGTTTG	NA	0.22631	-0.0147	0.009774	0.132599	35559
Ferkingstad	15494_11_FGFBP1_FGFP1	rs368253318,rs896610692	chr4	15964481	TTTTTG	NA	0.0001	0.447	0.443701	0.313726	35559
Ferkingstad	15499_11_ATRN_Attractin	rs118065662	chr20	3582219	G	A	0.01839	-1.6833	0.02494	1e-200	35559
Ferkingstad	15509_2_NAGLU_NAG	rs112629880	chr17	42463743	T	C	0.03648	1.3163	0.011269	1e-200	35559
Ferkingstad	15511_37_NPTXR_NPTXR	rs12628473	chr22	38844712	G	A	0.01493	1.5487	0.028057	1e-200	35559
Ferkingstad	15521_4_CLSTN1_Alcadein_alpha_1	rs150943878	chr1	9744257	T	C	0.0085	2.3589	0.035168	1e-200	35559
Ferkingstad	15522_2_GLIPR2_GAPR1	rs4878643	chr9	36153440	C	G	0.29073	-0.2766	0.00905	1e-200	35559
Ferkingstad	15523_9_ALAD_HEM2	rs1800435	chr9	113391611	G	C	0.08677	-0.4172	0.014596	1.117e-179	35559
Ferkingstad	15525_294_ADH1C_ADH1G	rs283415	chr4	99349450	T	C	0.48612	0.1279	0.008163	2.508e-55	35559
Ferkingstad	15526_33_GSS_GSHB	rs2424999	chr20	34798623	AGACA	NA	0.57766	0.17	0.008169	3.461e-96	35559
Ferkingstad	15527_90_DLD_DLDH	rs145670503	chr7	107915609	A	G	0.00278	-0.5168	0.074142	3.161e-12	35559
Ferkingstad	15530_33_EPHB4_EphB4	rs314366	chr7	100818887	A	G	0.50864	0.1105	0.008151	7.183e-42	35559
Ferkingstad	15535_3_PRSS27_Marapsin	rs71386687	chr16	2717893	T	G	0.09392	0.3074	0.013936	8.087e-108	35559
Ferkingstad	15539_15_SLITRK1_SLIK1	rs2876803	chr13	83794650	A	T	0.15307	0.0821	0.010976	7.453e-14	35559
Ferkingstad	15540_6_VIM_Vimentin	rs796667	chr10	16904820	T	G	0.57042	-0.0763	0.008063	2.989e-21	35559
Ferkingstad	15544_25_KLK14_kallikrein_14	rs36120499,rs398059815	chr19	51097514	T	TGA	0.56722	0.1976	0.008641	9.977e-116	35559
Ferkingstad	15558_63_ENPEP_AMPE	rs33966350	chr4	110510288	A	G	0.01592	-1.6451	0.026285	1e-200	35559
Ferkingstad	15565_102_MUC16_CA125	rs61742668	chr19	8882342	A	G	0.09744	-0.2546	0.013823	9.324e-76	35559
Ferkingstad	15566_10_CNN1_Calponin_1	rs112737376,rs34079154	chr19	11513538	GAGGA	G	0.04318	-0.256	0.02044	5.475e-36	35559
Ferkingstad	15570_99_CR2_Complement_receptor_type_2	rs61240730	chr1	207450585	C	T	0.14193	-0.2527	0.01227	2.998e-94	35559
Ferkingstad	15573_110_NCAN_CSPG3	rs2228603	chr19	19219115	T	C	0.07397	-0.3337	0.016232	6.535e-94	35559
Ferkingstad	15576_158_RNASE3_ECP	rs147307766	chr14	20917832	T	C	0.03506	0.7615	0.022299	1e-200	35559
Ferkingstad	15579_26_ENPP6_ENPP6	rs78293932	chr4	184217948	T	C	0.02708	0.1724	0.024815	3.72e-12	35559
Ferkingstad	15584_9_CFHR2_FHR2	rs74358366	chr1	196867290	TGTTTTTTTGTTG	NA	0.00068	0.482	0.145921	0.000956	35559
Ferkingstad	15584_9_CFHR2_FHR2	rs10630670	chr1	196867290	TGTTTTTTTTGTTG	NA	0.24833	-0.9495	0.004768	1e-200	35559
Ferkingstad	15584_9_CFHR2_FHR2	rs955999077	chr1	196867290	TGTTTTTTTT	NA	0.00117	0.3719	0.111512	0.0008528	35559
Ferkingstad	15584_9_CFHR2_FHR2	rs35266328,rs55868430,rs745774570	chr1	196867290	TGTTTTTTTTTTTG	NA	0.11885	0.0827	0.01187	3.241e-12	35559
Ferkingstad	15584_9_CFHR2_FHR2	rs35266328	chr1	196867290	TGTTTTTTTTTTTTG	NA	0.00124	0.1238	0.099355	0.212751	35559
Ferkingstad	15585_304_FBLN5_fibulin_5	rs2430349	chr14	91882631	G	A	0.73282	-0.0839	0.009193	7.089e-20	35559
Ferkingstad	15587_20_FOLR2_FOLR2	rs536192362	chr11	72217966	A	G	0.00253	-0.787	0.080533	1.48e-22	35559
Ferkingstad	15588_17_GLA_galactosidase__alpha	rs104894845	chrX	101401752	T	C	0.00984	-0.9162	0.034704	1.36e-153	35559
Ferkingstad	15589_1_GC_Gc_Globulin__Mixed_Type	rs758537485	chr4	71755063	T	A	0.00123	2.2781	0.11517	4.403e-87	35559
Ferkingstad	15594_47_HTRA1_HTRA1	rs61871680	chr10	122310940	A	G	0.19538	0.1095	0.01041	7.104e-26	35559
Ferkingstad	15604_18_MAPK9_JNK2	rs3763131	chr5	180307312	C	T	0.20055	0.1846	0.010028	1.131e-75	35559
Ferkingstad	15607_56_PKLR_KPYR	rs141119689	chr1	155301642	T	NA	0.07753	-0.2453	0.015267	4.288e-58	35559
Ferkingstad	15607_56_PKLR_KPYR	rs76342964	chr1	155301642	TT	NA	0.00036	0.0749	0.25713	0.770828	35559
Ferkingstad	15613_16_PNLIP_LIPP	rs113558089	chr10	116568887	T	C	0.00821	-0.4039	0.044552	1.236e-19	35559
Ferkingstad	15614_168_LILRA2_LIRA2	rs28384500	chr19	54573515	G	A	0.12265	-0.6254	0.009822	1e-200	35559
Ferkingstad	15615_8_LILRB3_LIRB3	rs3745410	chr19	54217027	G	A	0.06616	1.6345	0.010086	1e-200	35559
Ferkingstad	15617_8_XCL2_lymphotactin_beta	rs4501820	chr1	168542083	T	C	0.20457	0.0744	0.009799	3.142e-14	35559
Ferkingstad	15620_4_NLGN1_NLGN1	rs557382	chr3	173395769	G	T	0.29581	0.1333	0.009029	2.527e-49	35559
Ferkingstad	15626_223_HSPG2_Perlecan	rs2229475	chr1	21855402	T	C	0.06056	0.5138	0.017412	2.283e-191	35559
Ferkingstad	15633_6_RBP4_RBP	rs116887052	chr10	93593847	T	G	0.00045	3.2252	0.192283	3.835e-63	35559
Ferkingstad	15635_4_SMOC2_SMOC2	rs56296467	chr6	168463127	C	T	0.26123	-0.3125	0.009359	1e-200	35559
Ferkingstad	15636_49_SORCS1_SORC1	rs2210969	chr10	107273264	A	G	0.56657	-0.0639	0.008163	4.97e-15	35559
Ferkingstad	15640_54_TAGLN_TAGL	rs572839232	chr11	117128542	C	CT	0.01205	0.2848	0.036399	5.104e-15	35559
Ferkingstad	15641_20_TMEFF1_TEFF1	rs539001815	chr9	100498697	ACAC	NA	0.00012	0.5472	0.406632	0.178403	35559
Ferkingstad	15641_20_TMEFF1_TEFF1	rs372284828	chr9	100498697	ACACGC	NA	0.14189	0.0753	0.011528	6.503e-11	35559
Ferkingstad	15641_20_TMEFF1_TEFF1	rs544987468	chr9	100498697	GCGC	NA	0.00143	0.3095	0.130688	0.017873	35559
Ferkingstad	15644_1_BTD_Biotinidase	rs13078881	chr3	15645186	C	G	0.0288	-1.355	0.019113	1e-200	35559
Ferkingstad	15653_9_COL10A1_COAA1	rs9488842	chr6	116123005	C	A	0.26724	-0.2512	0.008777	3.897e-180	35559
Ferkingstad	16015_19_GPT_ALT	rs11337640,rs398010165,rs550030874	chr8	144490505	CA	NA	0.42593	-0.0511	0.008286	6.971e-10	35559
Ferkingstad	16035_8_FLT4_VEGF_sR3	rs34221241	chr5	180630293	C	T	0.13509	-0.1872	0.011642	3.57e-58	35559
Ferkingstad	16049_43_OLR1_OLR1	rs10637880,rs139391163,rs879784239,rs56968005	chr12	10162953	CTTTGTGTGTGTG	NA	0.39673	0.039	0.008124	1.581e-06	35559
Ferkingstad	16049_43_OLR1_OLR1	rs139391163,rs879784239,rs56968005	chr12	10162953	CTTTGTGTGTGTGTG	NA	0.07892	-0.181	0.014656	4.885e-35	35559
Ferkingstad	16049_43_OLR1_OLR1	rs139391163	chr12	10162953	CTTTGTGTGTGTGTGTG	NA	0.01473	0.0715	0.03245	0.027567	35559
Ferkingstad	16057_6_IGF2R_IGF_II_receptor	rs3777399	chr6	160092761	A	G	0.10781	0.5865	0.010551	1e-200	35559
Ferkingstad	16060_99_NID2_NID2	rs2516600	chr14	52021048	C	T	0.57784	0.4901	0.006303	1e-200	35559
Ferkingstad	16070_7_WIF1_WIF_1	rs466104	chr12	64937575	C	T	0.43494	-0.0584	0.008101	5.62e-13	35559
Ferkingstad	16079_2_TEC_TEC	rs58762758	chr4	48215229	A	G	0.50736	-0.1092	0.008136	4.506e-41	35559
Ferkingstad	16288_17_EPHA4_EPHA4	rs768988278	chr2	221540211	T	C	0.00261	-2.2803	0.089865	4.8e-142	35559
Ferkingstad	16296_43_LGR5_LGR5	rs4287406	chr12	71495073	GTAGTAG	NA	0.00074	0.3297	0.14723	0.025133	35559
Ferkingstad	16296_43_LGR5_LGR5	rs113138849	chr12	71495073	GTAGTG	NA	0.00138	0.0266	0.111354	0.8112	35559
Ferkingstad	16300_4_TREM2_TREM2	rs143332484	chr6	41161469	T	C	0.00868	-1.4387	0.041988	1e-200	35559
Ferkingstad	16302_11_BPIFA2_SPLC2	rs3818222	chr20	33225117	A	G	0.5075	-0.0768	0.008193	7.002e-21	35559
Ferkingstad	16307_22_UNC5D_UNC5H4	rs2405810	chr8	35261107	C	T	0.47435	-0.0992	0.008153	4.657e-34	35559
Ferkingstad	16309_30_DKKL1_Soggy_1	rs777541738	chr19	49389237	A	NA	0.01734	0.0392	0.030018	0.191586	35559
Ferkingstad	16309_30_DKKL1_Soggy_1	rs55689129	chr19	49389237	AAGACCCCTGAAATCCAGCCAG	NA	0.44411	-0.0516	0.008009	1.174e-10	35559
Ferkingstad	16318_12_ACVRL1_ALK_1	rs2277382	chr12	51912437	T	C	0.09029	0.3163	0.013873	4.581e-115	35559
Ferkingstad	16322_10_PACAP_PACAP	rs140248321,rs55633667	chr5	139390083	AGAT	A	0.06738	0.2902	0.016795	6.753e-67	35559
Ferkingstad	16324_38_TLR1_TLR1	rs200264939	chr4	38797694	A	G	0.00276	1.3544	0.074474	6.642e-74	35559
Ferkingstad	16558_2_MYOC_MYOC	rs7547721	chr1	171648625	A	G	0.08521	-0.4858	0.01472	1e-200	35559
Ferkingstad	16594_44_FAIM_FAIM1	rs13043	chr3	138629146	C	T	0.02521	-0.9978	0.02241	1e-200	35559
Ferkingstad	16596_25_GLRX3_GLRX3	rs12248841	chr10	130146988	C	T	0.41819	-0.0791	0.008285	1.323e-21	35559
Ferkingstad	16605_2_C1QTNF9_C1T9A	rs11840418	chr13	24359488	T	C	0.29443	-0.209	0.008677	3.486e-128	35559
Ferkingstad	16606_85_AKR1B1_Aldose_reductase	rs199519799	chr7	134442795	C	T	0.0084	-0.4354	0.044162	6.264e-23	35559
Ferkingstad	16609_106_KIRREL2_KIRR2	rs143257786	chr19	35860403	T	G	0.02421	-1.2928	0.021873	1e-200	35559
Ferkingstad	16610_13_LRP10_LRP10	rs781073232	chr14	22875388	A	G	0.00129	-1.6982	0.121839	3.716e-44	35559
Ferkingstad	16613_3_CDH17_CAD17	rs7833351	chr8	94169950	A	G	0.68819	-0.2677	0.00861	1e-200	35559
Ferkingstad	16614_27_RSPO1_RSPO1	rs36043533	chr1	37613845	G	T	0.04142	0.4421	0.020563	1.566e-102	35559
Ferkingstad	16620_26_LY75_LY75	rs72955755	chr2	159861821	G	C	0.46857	0.8438	0.004299	1e-200	35559
Ferkingstad	16621_77_APOA1BP_AIBP	rs10796961	chr1	156586529	A	G	0.98055	0.5361	0.028402	1.814e-79	35559
Ferkingstad	16753_46_COL6A2_CO6A2	rs35548026	chr21	46132295	A	G	0.09329	-0.3871	0.013832	2.435e-172	35559
Ferkingstad	16763_11_LECT2_LECT2	rs62623707	chr5	135952943	G	A	0.05551	-1.39	0.012336	1e-200	35559
Ferkingstad	16773_29_SCUBE3_SCUB3	rs3800403	chr6	35170473	G	A	0.86204	0.2734	0.011634	4.04e-122	35559
Ferkingstad	16781_2_ENGASE_ENASE	rs56107536	chr17	79074958	A	C	0.13679	0.6103	0.009574	1e-200	35559
Ferkingstad	16785_45_DEFA5_HD_5	rs7839771	chr8	7055504	T	C	0.01773	-0.2965	0.031852	1.293e-20	35559
Ferkingstad	16803_4_CALB2_CALB2	rs35769636,rs796290710	chr16	72117248	A	AT	0.31427	0.0521	0.008413	5.904e-10	35559
Ferkingstad	16809_1_NME4_NDKM	rs7199565	chr16	394597	CAAAAACAAAAA	NA	0.39911	0.1638	0.008027	1.492e-92	35559
Ferkingstad	16818_200_CDCP1_CDCP1	rs2276862	chr3	45146293	G	C	0.17419	-0.2934	0.010682	4.47e-166	35559
Ferkingstad	16825_20_ATXN3_ATX3	rs2273185	chr14	91993754	A	C	0.3681	-0.2439	0.008247	3.336e-192	35559
Ferkingstad	16828_8_COL6A1_Collagen_a1_VI_	rs1053312	chr21	46003475	A	G	0.35257	-1.2324	0.0039	1e-200	35559
Ferkingstad	16851_50_SCO2_SCO2	rs74479613	chr22	50525476	T	C	0.08871	-0.1597	0.013843	8.652e-31	35559
Ferkingstad	16853_5_NRK1_NRK1	rs11144225	chr9	75092384	T	A	0.37121	-0.1551	0.008228	2.912e-79	35559
Ferkingstad	16872_248_GSTZ1_MAAI	rs7975	chr14	77326864	A	G	0.31277	1.1519	0.004391	1e-200	35559
Ferkingstad	16882_27_PHPT1_PHP14	rs4880150	chr9	136875889	T	C	0.74159	-0.2085	0.009122	1.253e-115	35559
Ferkingstad	16890_37_ADAMTSL1_ATL1	rs702208	chr9	18639745	G	A	0.04681	0.5542	0.019732	1.451e-173	35559
Ferkingstad	16892_23_ENPP2_ENPP2	rs34391603,rs796772394	chr8	119717207	CAAAAAAAAAAAAAA	NA	0.39947	-0.1623	0.008476	9.835e-82	35559
Ferkingstad	16892_23_ENPP2_ENPP2	rs1034314150	chr8	119717207	CAAAAAAAAAAAAAAG	NA	0.0002	-0.3141	0.29338	0.284338	35559
Ferkingstad	16900_29_MDGA1_MDGA1	rs9349050	chr6	37695848	C	T	0.52644	-1.0586	0.004414	1e-200	35559
Ferkingstad	16908_5_OMG_OMGP	rs12449302	chr17	31084555	C	T	0.16538	-0.1193	0.011035	3.04e-27	35559
Ferkingstad	16913_8_RNASET2_RNT2	rs11159	chr6	166929652	CA	NA	0.07172	-0.6206	0.01276	1e-200	35559
Ferkingstad	16915_153_SEMA4A_SEM4A	rs7695	chr1	156177535	C	T	0.37641	0.1667	0.008701	8.287e-82	35559
Ferkingstad	16916_19_SLITRK6_SLIK6	rs9547175	chr13	85342038	T	C	0.21459	-0.2052	0.009735	1.243e-98	35559
Ferkingstad	16918_198_TLR3_TLR3	rs3775291	chr4	186082920	T	NA	0.28832	-0.7045	0.006868	1e-200	35559
Ferkingstad	17148_7_BLVRB_BLVRB	rs149698066	chr19	40458157	A	G	0.00373	-1.6302	0.066985	8.003e-131	35559
Ferkingstad	17150_8_HSPE1_HSP_10	rs768477167	chr2	197503236	G	A	0.00054	-0.9566	0.156521	9.862e-10	35559
Ferkingstad	17151_84_IRF3_IRF_3	rs10415576	chr19	49661133	C	T	0.38466	-0.0715	0.008322	8.538e-18	35559
Ferkingstad	17156_72_DCLK1_DCAK1	rs1926318	chr13	36070005	T	C	0.21111	0.2174	0.009853	6.835e-108	35559
Ferkingstad	17161_1_DDOST_OST48	rs145940009	chr1	20652643	A	G	0.00488	-1.0085	0.055603	1.614e-73	35559
Ferkingstad	17170_15_CALCB_CALCB	rs10766205	chr11	15070774	A	G	0.7247	0.2492	0.008738	6.579e-179	35559
Ferkingstad	17195_43_BAG1_BAG_1	rs201889975	chr9	33261124	G	A	0.00074	-1.0119	0.155801	8.313e-11	35559
Ferkingstad	17210_2_TCL1A_TCL1A	rs78986913	chr14	95696081	A	G	0.0414	-0.453	0.020597	3.308e-107	35559
Ferkingstad	17231_1_LCP1_L_plastin	rs117014375	chr13	46158935	A	G	0.00381	-1.8767	0.065532	2.276e-180	35559
Ferkingstad	17325_10_GUK1_KGUA	rs61825157	chr1	228111751	T	C	0.06717	0.3558	0.016093	2.593e-108	35559
Ferkingstad	17329_2_BDH2_BDH2	rs2711897	chr4	103102410	T	C	0.387	0.201	0.008038	5.189e-138	35559
Ferkingstad	17331_138_KREMEN1_KREM1	rs16987164	chr22	29144600	G	A	0.0064	-1.7296	0.054088	1e-200	35559
Ferkingstad	17332_3_ADPRHL2_ARHL2	rs766063732	chr1	36025106	C	A	0.00556	-1.3633	0.053738	5.512e-142	35559
Ferkingstad	17333_20_ACADM_ACADM	rs12126607	chr1	75751398	TTATCTCTTTTAAGA	NA	0.30156	0.2255	0.008614	4.619e-151	35559
Ferkingstad	17341_89_ACAT2_THIC	rs25683	chr6	159775311	G	A	0.57004	-0.2664	0.008124	1e-200	35559
Ferkingstad	17342_13_AGR3_AGR3	rs145337555	chr7	16861411	A	NA	0.00185	-0.9714	0.099303	1.343e-22	35559
Ferkingstad	17343_6_SNPH_SNPH	rs762640397	chr20	1261796	CTTTT	NA	0.09152	-0.0647	0.013719	2.406e-06	35559
Ferkingstad	17345_12_ZADH2_ZADH2	rs9240	chr18	75198732	C	T	0.42799	-0.0937	0.008005	1.203e-31	35559
Ferkingstad	17350_13_CHMP2B_CHM2B	rs7637388	chr3	87267767	ACTACTTTTTT	NA	0.35321	0.239	0.008387	1.33e-178	35559
Ferkingstad	17357_33_SEPSECS_SPCS	rs6448333	chr4	25115419	T	C	0.03656	-0.1556	0.020634	4.663e-14	35559
Ferkingstad	17377_1_AKR1C3_Aldose_reductase_like_C3	rs753622030	chr10	5257749	G	A	0.00499	-1.1479	0.058497	9.825e-86	35559
Ferkingstad	17383_4_STARD5_STAR5	rs11634869	chr15	81274272	T	A	0.24868	-0.2125	0.009265	2.004e-116	35559
Ferkingstad	17384_110_PFKM_K6PF	rs4760682	chr12	48118502	A	C	0.80686	0.2044	0.010165	6.358e-90	35559
Ferkingstad	17391_10_RBM17_SPF45	rs1413044500	chr10	6091013	TTATATATTTATATATATTTATATATTTTTATATATTTA	NA	0.00018	0.1896	0.261856	0.469027	35559
Ferkingstad	17391_10_RBM17_SPF45	rs118076095	chr10	6091013	TTATATATTTATATATTTTTATATATTTT	NA	0.00218	0.0332	0.083599	0.69127	35559
Ferkingstad	17391_10_RBM17_SPF45	rs201072484	chr10	6091013	TTATATATTTT	NA	0.04338	-0.4657	0.02008	5.426e-119	35559
Ferkingstad	17396_23_ADH1A_ADH1A	rs77326813	chr4	99185386	T	C	0.01069	-0.6052	0.039849	4.289e-52	35559
Ferkingstad	17398_55_HMOX1_HO_1	rs540828131	chr22	35386515	G	A	0.00694	-0.7717	0.049555	1.118e-54	35559
Ferkingstad	17403_14_ACADSB_acyl_Coenzyme_A_dehydrogenase	rs7913063	chr10	123039167	T	A	0.09324	0.1687	0.013449	4.318e-36	35559
Ferkingstad	17410_5_CETN3_CETN3	rs4873	chr5	90407824	G	C	0.28903	-0.0794	0.008817	2.142e-19	35559
Ferkingstad	17419_17_TES_TES	rs143664050	chr7	116211123	A	G	0.01363	-0.2761	0.034748	1.928e-15	35559
Ferkingstad	17435_43_ETFA_ETFA	rs78185702	chr15	76317894	T	C	0.11241	0.0867	0.012656	7.351e-12	35559
Ferkingstad	17447_52_SFRP4_SFRP4	rs2598105	chr7	37937514	C	T	0.84489	-0.2693	0.011389	1.293e-123	35559
Ferkingstad	17453_34_CP_Ceruloplasmin	rs56033670	chr3	149182035	CTC	NA	0.00345	0.6889	0.063987	4.972e-27	35559
Ferkingstad	17454_15_EGFL6_EGFL6	rs5935624	chrX	13582123	T	C	0.46222	-0.3106	0.005771	1e-200	35559
Ferkingstad	17460_51_MX1_Mx1	rs464138	chr21	41426246	C	A	0.47685	-0.3265	0.006889	1e-200	35559
Ferkingstad	17466_72_ACSF2_ACSF2	rs371898261,rs551929136	chr17	50426112	G	NA	0.29993	-0.0523	0.008696	1.808e-09	35559
Ferkingstad	17474_106_YEATS4_YETS4	rs72277077	chr12	69234593	G	NA	0.51126	-0.0468	0.007913	3.33e-09	35559
Ferkingstad	17490_4_SH3BGRL3_SH3BGRL3_like_protein	rs4659370	chr1	26293857	GATTGCTTTTTTTT	NA	0.91166	0.4569	0.01414	1e-200	35559
Ferkingstad	17513_11_ANXA11_ANX11	rs2152546	chr10	80146628	T	G	0.45437	-0.147	0.007941	1.688e-76	35559
Ferkingstad	17514_48_RAB21_RAB21	rs61754230	chr12	71785666	T	C	0.01602	-0.3263	0.031455	3.269e-25	35559
Ferkingstad	17515_6_HSPA13_STCH	rs754526828	chr21	14371141	C	T	0.00092	1.9281	0.143334	3.006e-41	35559
Ferkingstad	17675_17_ACOT13_ACO13	rs139018301	chr6	24667289	A	G	0.00071	2.2444	0.158814	2.403e-45	35559
Ferkingstad	17676_13_TRIP10_CIP4	rs75269317	chr19	6740156	A	G	0.0066	-0.3109	0.049934	4.779e-10	35559
Ferkingstad	17677_47_CD160_BY55	rs3753436	chr1	145716953	C	T	0.46088	-0.1313	0.007922	1.088e-61	35559
Ferkingstad	17680_12_EPHB1_EPHB1	rs185257	chr3	134953443	A	C	0.47662	0.2774	0.007941	1e-200	35559
Ferkingstad	17682_1_CD46_CD46	rs10746399	chr1	207770727	C	T	0.54745	-0.2398	0.008173	3.182e-189	35559
Ferkingstad	17685_9_APOA4_Apo_A_IV	rs12721043	chr11	116821577	A	C	0.00919	-0.6329	0.043419	3.955e-48	35559
Ferkingstad	17686_27_TBCB_TBCB	rs2231569	chr19	36114973	T	G	0.03419	0.1586	0.022527	1.918e-12	35559
Ferkingstad	17691_1_TPP1_TPP1	rs119455955	chr11	6617040	A	G	0.00291	-1.9252	0.072635	8.451e-155	35559
Ferkingstad	17692_2_BTN3A3_BT3A3	rs760172657	chr6	26357434	ATTTTTTTTTTTTTTTTTTTG	NA	0.00026	0.0937	0.25737	0.715808	35559
Ferkingstad	17692_2_BTN3A3_BT3A3	rs35024989	chr6	26357434	TTTTTTTTTTTTTTTTTG	NA	0.13378	-1.111	0.008045	1e-200	35559
Ferkingstad	17694_32_PSME2_PSME2	rs147705721	chr14	24144015	T	C	0.00363	-1.3307	0.065793	5.847e-91	35559
Ferkingstad	17697_2_OVCA2_OVCA2	rs145234879	chr17	2042060	A	C	0.00891	0.4066	0.043483	8.705e-21	35559
Ferkingstad	17706_4_PPP1R1A_PPR1A	rs10876568	chr12	54590778	C	G	0.1877	0.0648	0.010359	3.968e-10	35559
Ferkingstad	17712_7_IDI1_IDI1	rs4880758	chr10	1039632	G	C	0.06869	-0.1062	0.016237	6.129e-11	35559
Ferkingstad	17722_5_FKBP4_FKBP52_protein	rs34728283	chr12	2816423	A	G	0.05914	-0.1659	0.017247	6.644e-22	35559
Ferkingstad	17724_3_WWOX_WWOX	rs11545029	chr16	78386878	A	G	0.6174	-0.0695	0.008057	6.344e-18	35559
Ferkingstad	17726_3_SAR1A_SAR1A	rs870801	chr10	70169990	A	C	0.3952	0.1499	0.008296	5.582e-73	35559
Ferkingstad	17728_61_CHMP2A_CHM2A	rs773474943	chr19	58552429	T	G	0.00328	-0.5637	0.0726	8.197e-15	35559
Ferkingstad	17737_7_IVD_IVD	rs12902310	chr15	40423228	C	T	0.36207	0.1105	0.008218	3.219e-41	35559
Ferkingstad	17738_7_CRNN_CRNN	rs10494275	chr1	152419091	A	G	0.08129	-0.2261	0.013958	5.126e-59	35559
Ferkingstad	17739_1_HADH_HCDH	rs62311449	chr4	108029993	A	G	0.06497	-0.1396	0.016169	5.928e-18	35559
Ferkingstad	17746_77_FIS1_FIS1	rs75487681	chr7	101253420	T	A	0.05897	-0.3207	0.016818	4.616e-81	35559
Ferkingstad	17748_21_TP53I3_QORX	rs1134516	chr2	24119662	A	G	0.1212	-0.5259	0.010086	1e-200	35559
Ferkingstad	17751_68_CRYBB1_CRBB1	rs4822754	chr22	26616930	G	A	0.60672	-0.1728	0.008431	2.378e-93	35559
Ferkingstad	17755_5_UGDH_UGDH	rs10008031	chr4	39535532	G	A	0.5726	0.2969	0.008219	1e-200	35559
Ferkingstad	17756_69_DCTD_DCTD	rs2603350	chr4	183030757	G	A	0.37266	0.0846	0.008468	1.682e-23	35559
Ferkingstad	17758_79_DCXR_DCXR	rs759164616	chr17	82037657	T	C	0.00113	-1.4365	0.124756	1.115e-30	35559
Ferkingstad	17761_2_NUDT5_NUDT5	rs2399786	chr10	12173181	C	T	0.45012	-0.0714	0.008047	7.137e-19	35559
Ferkingstad	17764_108_RHOC_RHOC	rs1006298	chr1	112519337	A	NA	0.0202	0.0918	0.029288	0.001722	35559
Ferkingstad	17765_3_SNUPN_SPN1	rs8028182	chr15	75426328	T	G	0.16573	0.1519	0.010843	1.376e-44	35559
Ferkingstad	17766_5_NCF1_NCF_1	rs368358726	chr7	74772150	T	C	0.06425	0.6886	0.013809	1e-200	35559
Ferkingstad	17769_28_PCNP_PCNP	rs13060373	chr3	101631980	G	A	0.51368	0.0816	0.008142	1.213e-23	35559
Ferkingstad	17773_26_NAPG_SNAG	rs7241196	chr18	10526416	C	T	0.48895	-0.0727	0.008177	6.069e-19	35559
Ferkingstad	17776_15_PECR_PECR	rs73072196	chr2	216008671	C	T	0.10387	-0.1544	0.013046	2.568e-32	35559
Ferkingstad	17777_31_SDSL_SDSL	rs113152874	chr12	113429268	C	G	0.01745	0.7747	0.029994	4.246e-147	35559
Ferkingstad	17781_191_MAP1LC3A_MLP3A	rs6059848	chr20	34454238	T	C	0.49488	0.0534	0.008378	1.848e-10	35559
Ferkingstad	17782_23_ACAA1_THIK	rs2229528	chr3	38125604	G	A	0.0765	-0.6028	0.012914	1e-200	35559
Ferkingstad	17783_9_MMAB_MMAB	rs67658872	chr12	109603500	T	NA	0.17415	-0.4435	0.008999	1e-200	35559
Ferkingstad	17785_11_RCL_RCL	rs144767533	chr6	43218400	C	T	0.09241	-0.1574	0.013777	3.129e-30	35559
Ferkingstad	17786_5_GGPS1_GGPPS	rs7534175	chr1	235346698	G	A	0.13429	0.1288	0.01168	2.827e-28	35559
Ferkingstad	17787_1_ECHS1_Enoyl_CoA_hydratase	rs10466126	chr10	133373302	G	A	0.74729	-0.0586	0.009042	9.102e-11	35559
Ferkingstad	17791_25_HPCAL1_HPCL1	rs6737972	chr2	10334724	C	T	0.17255	0.1624	0.010618	8.36e-53	35559
Ferkingstad	17794_6_PMM2_Phosphomannomutase_2	rs28936415	chr16	8811153	A	G	0.00581	-0.9974	0.054166	1.016e-75	35559
Ferkingstad	17799_9_PGLS_6PGL	rs756992249	chr19	17521065	A	AG	0.00546	-1.2578	0.056509	9.323e-110	35559
Ferkingstad	17802_4_NANS_SIAS	rs143387431	chr9	98076920	A	G	0.00912	-0.6713	0.041778	4.246e-58	35559
Ferkingstad	17808_37_NIT2_NIT2	rs776432845	chr3	99820005	A	G	0.00348	-1.1488	0.074223	4.901e-54	35559
Ferkingstad	17813_21_BPHL_BPHL	rs9503407	chr6	3143886	C	T	0.07547	0.2067	0.015216	4.934e-42	35559
Ferkingstad	17814_8_BPNT1_BPNT1	rs762659033	chr1	220062757	T	C	0.00127	-1.1551	0.113528	2.575e-24	35559
Ferkingstad	17819_30_FAHD1_FAHD1	rs148801516	chr16	1832971	AAGAT	NA	0.15589	0.2156	0.011168	4.84e-83	35559
Ferkingstad	17819_30_FAHD1_FAHD1	rs78965917	chr16	1832971	GAC	NA	0.00949	0.125	0.043075	0.003709	35559
Ferkingstad	17821_20_NMT2_NMT2	rs4237446	chr10	15199924	C	T	0.19649	0.0756	0.010191	1.186e-13	35559
Ferkingstad	17832_12_IDI2_IDI2	rs61830965	chr10	1015706	C	T	0.46953	0.1394	0.007878	4.544e-70	35559
Ferkingstad	17837_5_CLIC2_CLIC2	rs1330542447,rs782078989	chrX	155418693	CT	NA	0.6983	-0.0187	0.007754	0.015883	35559
Ferkingstad	17837_5_CLIC2_CLIC2	rs1363505815	chrX	155418693	CTT	NA	0.00281	0.0996	0.067049	0.137417	35559
Ferkingstad	17837_5_CLIC2_CLIC2	rs1214264303	chrX	155418693	CTTTTTTT	NA	0.24851	-0.0056	0.008176	0.493399	35559
Ferkingstad	17843_30_PPCS_PPCS	rs2152315	chr1	42441912	G	A	0.358	-0.1025	0.008431	5.219e-34	35559
Ferkingstad	17856_23_NT5M_NT5M	rs192436452	chr17	17303358	C	G	0.0425	0.2945	0.019608	5.46e-51	35559
Ferkingstad	18162_167_IRAK4_IRAK4	rs775432754	chr12	43725429	G	NA	0.04515	0.1391	0.019277	5.363e-13	35559
Ferkingstad	18162_167_IRAK4_IRAK4	rs371790521	chr12	43725429	GT	NA	0.11372	0.0003	0.014159	0.983096	35559
Ferkingstad	18172_71_ASF1A_ASF1A	rs200062006,rs370893067	chr6	118894738	CTTGTTT	NA	0.01496	0.001	0.032336	0.975329	35559
Ferkingstad	18172_71_ASF1A_ASF1A	rs147886588	chr6	118894738	GTTGTTTGAGCGGAG	NA	0.1641	0.1315	0.010696	9.664e-35	35559
Ferkingstad	18173_11_AKR7A3_ARK73	rs145878095	chr1	19288547	T	C	0.0084	-1.1778	0.043535	3.442e-161	35559
Ferkingstad	18174_79_PDCD6IP_PDC6I	rs9876986	chr3	33799573	G	A	0.26504	-0.1121	0.009086	5.689e-35	35559
Ferkingstad	18175_65_VAT1_VAT1	rs143297645	chr17	43018676	T	C	0.00118	-0.9778	0.112337	3.2e-18	35559
Ferkingstad	18180_58_RTN4IP1_RT4I1	rs9373885	chr6	106635743	T	C	0.27213	-0.0721	0.008871	4.379e-16	35559
Ferkingstad	18181_2_TSSC4_TSSC4	rs11555995	chr11	2402315	G	A	0.12508	0.0795	0.012246	8.471e-11	35559
Ferkingstad	18183_3_LDLRAP1_ARH	rs75446219	chr1	25551001	T	C	0.03208	0.2673	0.023894	4.727e-29	35559
Ferkingstad	18185_118_ALDOB_ALDOB	rs10123355	chr9	101427622	A	NA	0.00402	-1.076	0.071322	1.989e-51	35559
Ferkingstad	18188_12_GATM_GATM	rs1153858	chr15	45360505	T	C	0.25282	-0.1811	0.009223	7.653e-86	35559
Ferkingstad	18213_30_UBE2F_UBE2F	rs59412705	chr2	237955596	A	T	0.41211	0.0683	0.008154	5.486e-17	35559
Ferkingstad	18214_2_GCLM_GSH0	rs12563495	chr1	93919068	A	G	0.43666	-0.0852	0.008128	1.043e-25	35559
Ferkingstad	18215_5_THG1L_THG1	rs2270812	chr5	157737954	C	T	0.6639	0.3708	0.007154	1e-200	35559
Ferkingstad	18216_22_IL11RA_IL_11_RA	rs111033640,rs1275569312	chr9	34646575	C	CCAGT	0.0723	0.6422	0.012797	1e-200	35559
Ferkingstad	18218_48_CNRIP1_CB032	rs7578047	chr2	68352799	G	A	0.13642	-0.6565	0.009465	1e-200	35559
Ferkingstad	18220_141_SRA1_SRA1	rs2563253	chr5	140582582	G	A	0.58379	-0.1156	0.008118	5.225e-46	35559
Ferkingstad	18222_34_SH3GLB2_SHLB2	rs7870053	chr9	129025850	G	C	0.44594	-0.3438	0.006869	1e-200	35559
Ferkingstad	18225_13_HEBP1_HEBP1	rs1941	chr12	12975329	G	C	0.02743	-1.3694	0.020383	1e-200	35559
Ferkingstad	18235_16_PGP_PGP	rs116977380	chr16	2213835	T	NA	0.03756	0.4767	0.021505	7.187e-109	35559
Ferkingstad	18236_3_HSPC159_LEGL	rs78459351	chr2	64366325	A	G	0.04614	0.1651	0.019587	3.485e-17	35559
Ferkingstad	18241_18_CPOX_HEM6	rs1675513	chr3	98589854	G	A	0.13903	-0.1881	0.011719	5.616e-58	35559
Ferkingstad	18243_9_CMPK1_Cytidylate_kinase	rs35687416	chr1	47368537	T	G	0.06493	-0.1668	0.015955	1.399e-25	35559
Ferkingstad	18280_29_DTD2_DTD2	rs56183134	chr14	31438588	C	T	0.11109	-0.1573	0.012956	6.386e-34	35559
Ferkingstad	18289_16_CCL15_MIP_5	rs1180953693	chr17	36001618	GCAGAGGT	NA	0.04328	1.6905	0.014333	1e-200	35559
Ferkingstad	18289_16_CCL15_MIP_5	rs1411351436	chr17	36001618	G	NA	0.00083	-1.0966	0.13766	1.639e-15	35559
Ferkingstad	18295_102_GRHPR_GRHPR	rs67294455	chr9	37422517	ACCCCCCCCA	NA	0.32015	0.2671	0.008592	1e-200	35559
Ferkingstad	18295_102_GRHPR_GRHPR	rs10973330	chr9	37422517	ACCCCCCCCCA	NA	0.03917	-0.0689	0.020932	0.0009961	35559
Ferkingstad	18295_102_GRHPR_GRHPR	rs13299681	chr9	37422517	ACCCCCTCACA	NA	0.45153	-0.1773	0.00805	1.633e-107	35559
Ferkingstad	18307_71_PPA2_PPase_2	rs4699179	chr4	105474024	A	G	0.26466	0.1054	0.009075	3.5e-31	35559
Ferkingstad	18312_68_NDRG3_NDRG3	rs143375728	chr20	36708495	CACAAAAAT	NA	0.01786	0.3246	0.029636	6.437e-28	35559
Ferkingstad	18313_4_ASRGL1_Asparaginase_like_protein_1	rs12275541	chr11	62322339	A	G	0.31592	-0.2112	0.008638	5.143e-132	35559
Ferkingstad	18315_38_RTP4_RTP4	rs1878861	chr3	187375904	A	G	0.58328	-0.3259	0.007125	1e-200	35559
Ferkingstad	18319_7_PDHX_ODPX	rs35560997	chr11	34978135	C	G	0.01117	-0.457	0.036834	2.39e-35	35559
Ferkingstad	18330_7_PGM2_PGM2	rs187076049	chr4	37846957	G	A	0.00519	1.3994	0.053705	1.123e-149	35559
Ferkingstad	18332_17_CPLX1_CPLX1	rs7687101	chr4	818891	T	G	0.433	0.0568	0.008011	1.336e-12	35559
Ferkingstad	18338_26_IDH1_IDH	rs34599179	chr2	208243577	C	T	0.00755	-1.0718	0.046918	1.663e-115	35559
Ferkingstad	18340_2_PSMB4_Proteasome_beta_chain	rs4246527	chr1	151431472	T	C	0.86359	0.6383	0.00979	1e-200	35559
Ferkingstad	18342_2_PSAT1_SERC	rs2277148	chr9	78297199	C	G	0.7815	0.1495	0.009813	2.078e-52	35559
Ferkingstad	18343_10_DECR2_DECR2	rs1204500	chr16	415611	AT	NA	0.571	0.5027	0.006621	1e-200	35559
Ferkingstad	18381_16_ALDH2_ALDH_E2	rs1325481014	chr12	112424891	ATGTGTGTGTGTGTGTGT	NA	0.00639	-0.7679	0.048106	2.326e-57	35559
Ferkingstad	18381_16_ALDH2_ALDH_E2	rs1285555549	chr12	112424891	ATGTGTGTGTGTGTGTGTGTGTGTGT	NA	0.08483	0.0423	0.014735	0.004095	35559
Ferkingstad	18381_16_ALDH2_ALDH_E2	rs567490227,rs780745711	chr12	112424891	GTATGTGTGTGTGTGTGTGTGTGTGT	NA	0.11509	-0.0672	0.012918	1.973e-07	35559
Ferkingstad	18382_109_COMT_Catechol_O_methyltransferase	rs165656	chr22	19961340	C	NA	0.57346	-0.0821	0.008274	3.333e-23	35559
Ferkingstad	18386_36_GLRX_GLRX1	rs6556885	chr5	95825737	A	G	0.25611	-0.0845	0.00908	1.33e-20	35559
Ferkingstad	18387_7_ST13_suppression_of_tumorigenicity_13	rs11308730,rs369294272	chr22	40843884	ATTTTTTTTTTTTTTTT	NA	0.47042	0.0549	0.007941	4.727e-12	35559
Ferkingstad	18387_7_ST13_suppression_of_tumorigenicity_13	rs766973514	chr22	40843884	TTTTTTTTTTTTTTTTT	NA	0.00359	0.0113	0.065699	0.86344	35559
Ferkingstad	18396_10_AES_AES	rs11539938	chr19	3062859	C	T	0.43588	-0.0526	0.008018	5.371e-11	35559
Ferkingstad	18401_18_ALKBH3_ALKB3	rs2434484	chr11	43927458	G	T	0.33932	-0.2406	0.008594	1.875e-172	35559
Ferkingstad	18413_24_ARL4D_ARL4D	rs5820482	chr17	43073637	T	TA	0.15144	0.0722	0.011086	7.372e-11	35559
Ferkingstad	18417_3_AS3MT_AS3MT	rs145231815	chr10	102879894	G	NA	0.0939	0.017	0.013403	0.204651	35559
Ferkingstad	18417_3_AS3MT_AS3MT	rs149587326,rs34006263,rs533973612,rs72101945	chr10	102879894	GTA	NA	0.25626	-0.0547	0.00906	1.567e-09	35559
Ferkingstad	18422_41_MVD_ERG19	rs374753109	chr16	88662698	T	C	0.0024	-0.7665	0.079384	4.657e-22	35559
Ferkingstad	18435_40_UBXN2B_UBX2B	rs7000685	chr8	58004774	C	G	0.37311	-0.0604	0.008255	2.534e-13	35559
Ferkingstad	18458_4_PTGES2_PGES2	rs13283456	chr9	128122474	T	C	0.18239	-0.0979	0.010428	6.113e-21	35559
Ferkingstad	18819_21_PPIC_PPIC	rs17388251	chr5	123024708	C	T	0.38977	-0.423	0.006313	1e-200	35559
Ferkingstad	18830_1_ITLN1_Omentin	rs1378460986	chr1	160888183	TACACACACACACACACACACACACACACACACACACACACACACACATG	NA	0.0093	0.0792	0.044325	0.07397	35559
Ferkingstad	18830_1_ITLN1_Omentin	rs10563077,rs1491547584	chr1	160888183	TACACACACACACACACACACACACACACACACACATG	NA	0.28726	-0.0246	0.009323	0.008323	35559
Ferkingstad	18830_1_ITLN1_Omentin	rs1460645257	chr1	160888183	TACACACACACACACACACACACACACACACACATG	NA	0.03989	-0.0399	0.021782	0.066988	35559
Ferkingstad	18831_6_LRIG1_LRIG1	rs2306272	chr3	66384219	C	T	0.32781	-0.6683	0.0063	1e-200	35559
Ferkingstad	18839_24_TG_Thyroglobulin	rs2979029	chr8	133107140	CC	NA	0.50975	0.0749	0.007998	7.619e-21	35559
Ferkingstad	18841_1_SERPINB13_SPB13	rs77157727	chr18	63586727	A	G	0.04297	-0.4352	0.019515	3.602e-110	35559
Ferkingstad	18864_7_PRSS3_TRY3	rs1266673472,rs538850212	chr9	33945182	TATATATATATATATG	NA	0.18571	-0.2992	0.010365	3.272e-183	35559
Ferkingstad	18864_7_PRSS3_TRY3	rs10537006,rs10550423	chr9	33945182	TATATATATATG	NA	0.22235	-0.3676	0.007033	1e-200	35559
Ferkingstad	18871_24_AIF1L_AIF1L	rs113409341	chr9	131059144	T	C	0.69616	-0.5418	0.007075	1e-200	35559
Ferkingstad	18873_8_CEACAM8_CEAM8	rs12459454	chr19	41759235	G	A	0.32116	-0.0737	0.008787	4.963e-17	35559
Ferkingstad	18875_125_COL2A1_Chondrocalcin	rs10875723	chr12	48023754	G	A	0.34875	-0.7002	0.00543	1e-200	35559
Ferkingstad	18876_77_CHST4_CHST4	rs58134724	chr16	71492188	T	C	0.2516	0.0838	0.009171	6.399e-20	35559
Ferkingstad	18878_15_GREM1_GREM1	rs2293582	chr15	32718211	A	G	0.15749	0.8193	0.008715	1e-200	35559
Ferkingstad	18880_81_COL3A1_Collagen_Type_III	rs72914144	chr2	189377017	T	C	0.18304	0.0772	0.010858	1.163e-12	35559
Ferkingstad	18881_7_CD97_CD97	rs548656990	chr19	14397745	A	G	0.0031	-1.6931	0.069117	1.617e-132	35559
Ferkingstad	18882_7_CLSTN2_CSTN2	rs35220837	chr3	139904479	A	G	0.07582	0.4115	0.015247	1.955e-160	35559
Ferkingstad	18884_22_DNAJB4_DNJB4	rs6699769	chr1	78038580	G	A	0.18483	-0.1915	0.010269	1.321e-77	35559
Ferkingstad	18891_98_GBP2_GBP2	rs368907894,rs759493623,rs59163475	chr1	89042979	C	NA	0.46371	0.0484	0.008094	2.231e-09	35559
Ferkingstad	18891_98_GBP2_GBP2	rs1338534892	chr1	89042979	CTTCTCTCCTTCTCTCTTCTCTCCTTCTCTC	NA	0.33809	0.0134	0.008457	0.113093	35559
Ferkingstad	18893_26_GPR56_GPR56	rs1801257	chr16	57655473	G	C	0.49131	0.0814	0.00817	2.194e-23	35559
Ferkingstad	18896_23_HS6ST3_H6ST3	rs9562027	chr13	96110589	T	A	0.40686	0.0954	0.008271	8.792e-31	35559
Ferkingstad	18899_82_HDGFRP3_HDGR3	rs9919979	chr15	83080047	A	C	0.06425	0.1776	0.015921	6.755e-29	35559
Ferkingstad	18916_25_ITPA_Inosine_triphosphatase	rs1127354	chr20	3213196	A	C	0.08308	-1.3321	0.010187	1e-200	35559
Ferkingstad	18921_30_PHEX_PHEX	rs178677	chrX	22022237	T	C	0.36528	-0.2143	0.007358	1.795e-186	35559
Ferkingstad	18922_27_CD68_CD68	rs9901673	chr17	7580783	AGTAAGTAACCT	NA	0.18217	0.0088	0.010586	0.405811	35559
Ferkingstad	18922_27_CD68_CD68	rs776414308	chr17	7580783	CATAAGTAACCT	NA	0.00225	-1.5242	0.084644	1.709e-72	35559
Ferkingstad	18922_27_CD68_CD68	rs756337554	chr17	7580783	CGTAAGTAA	NA	0.00072	0.0344	0.148768	0.817134	35559
Ferkingstad	18930_28_SLIT2_SLIT2	rs33981021,rs398092214	chr4	20202934	C	CA	0.67977	-0.1035	0.008806	6.818e-32	35559
Ferkingstad	18933_4_TGM4_TGM4	rs1995640	chr3	44901577	T	C	0.41121	-0.0511	0.008062	2.324e-10	35559
Ferkingstad	18934_50_TGM2_Tissue_transglutaminase	rs742413	chr20	38169085	TT	NA	0.64585	0.1802	0.008247	7.632e-106	35559
Ferkingstad	19113_66_SH3BGRL2_SH3L2	rs2812679	chr6	79616293	T	C	0.54595	0.1019	0.008278	8e-35	35559
Ferkingstad	19115_13_CMBL_CMBL	rs13180748	chr5	10286630	TCCTTACTACC	NA	0.75061	-0.1747	0.009195	1.706e-80	35559
Ferkingstad	19124_9_UBLCP1_UBCP1	rs13171129	chr5	159306365	A	C	0.03035	-0.5065	0.023672	1.438e-101	35559
Ferkingstad	19129_15_MTHFSD_MTHFSD	rs3950702	chr16	86534448	C	T	0.60096	0.3176	0.006967	1e-200	35559
Ferkingstad	19130_81_SERPINB8_SPB8	rs3826616	chr18	63987229	G	A	0.58582	-0.1817	0.008217	2.327e-108	35559
Ferkingstad	19136_22_ALDH6A1_MMSA	rs564734952	chr14	73857615	CACTCCAAAAAAAAAAA	NA	0.00076	-0.1584	0.143772	0.270573	35559
Ferkingstad	19136_22_ALDH6A1_MMSA	rs111810763	chr14	73857615	CACTCCAAAAAAAAAT	NA	0.52152	-0.0283	0.007905	0.0003434	35559
Ferkingstad	19136_22_ALDH6A1_MMSA	rs72723742	chr14	73857615	CACTCCAAAAAAAAATT	NA	0.02951	-0.3725	0.022932	2.489e-59	35559
Ferkingstad	19143_38_CYB5R2_NB5R2	rs12362956	chr11	7661453	C	T	0.62476	0.2229	0.008562	2.015e-149	35559
Ferkingstad	19150_20_PRPSAP2_KPRB	rs61214683,rs71355575	chr17	18898885	GTGTT	NA	0.45311	0.0595	0.008159	3.048e-13	35559
Ferkingstad	19150_20_PRPSAP2_KPRB	rs111457735,rs55864350,rs776603285	chr17	18898885	GTGTTTGTT	NA	0.46135	-0.0512	0.008159	3.494e-10	35559
Ferkingstad	19150_20_PRPSAP2_KPRB	rs1263562321	chr17	18898885	GTGTTTGTTTGTTTGTT	NA	0.0004	0.3293	0.219249	0.133111	35559
Ferkingstad	19153_53_MPPED2_MPPD2	rs11031140	chr11	30586586	A	G	0.17848	-0.1597	0.01039	2.585e-53	35559
Ferkingstad	19161_1_USP15_UBP15	rs73136831	chr12	62337470	T	A	0.09696	0.1998	0.013615	9.348e-49	35559
Ferkingstad	19173_5_ZFAND1_ZFAN1	rs35215978	chr8	81642891	ACG	NA	0.03519	0.1794	0.022747	3.099e-15	35559
Ferkingstad	19173_5_ZFAND1_ZFAN1	rs2975932	chr8	81642891	TACA	NA	0.17906	0.1937	0.01073	7.577e-73	35559
Ferkingstad	19176_27_FAM49B_FA49B	rs6470800	chr8	130088714	T	G	0.55649	-0.0491	0.00795	6.58e-10	35559
Ferkingstad	19183_164_RPL12_RL12	rs140830837	chr9	127371358	T	C	0.01272	-0.2584	0.034338	5.265e-14	35559
Ferkingstad	19187_21_STAMBP_STABP	rs559935910	chr2	73889990	A	G	0.00428	-0.7074	0.062988	2.883e-29	35559
Ferkingstad	19194_9_DTD1_Histidyl_tRNA_synthetase_related	rs6081231	chr20	18590320	A	G	0.34926	-0.2005	0.008314	1.68e-128	35559
Ferkingstad	19197_95_ACAT1_THIL	rs570935666	chr11	108139811	CCCCCATGCCCA	NA	0.00015	0.1527	0.315012	0.627858	35559
Ferkingstad	19197_95_ACAT1_THIL	rs72431625	chr11	108139811	C	NA	0.19116	0.1136	0.010081	1.867e-29	35559
Ferkingstad	19202_10_BTK_BTK	rs35354693,rs534812782	chrX	101327756	ATCTCA	NA	0.60821	0.0462	0.007512	7.733e-10	35559
Ferkingstad	19206_20_NUDT1_8ODP	rs1637732	chr7	2217167	C	T	0.00783	-0.3717	0.04604	6.839e-16	35559
Ferkingstad	19213_1_SPINK4_ISK4	rs1630171	chr9	33234041	G	A	0.15268	0.2788	0.011113	6.624e-139	35559
Ferkingstad	19223_6_RAB1A_RAB1A	rs2422441	chr2	65143632	G	A	0.76606	0.0607	0.009369	9.26e-11	35559
Ferkingstad	19230_12_GSTT1_GSTT1	rs1439613518	chr22	24001379	G	A	0.53084	0.6814	0.006458	1e-200	35559
Ferkingstad	19233_75_ATOX1_ATOX1	rs397740328,rs57227549	chr5	151842342	GACAAAAAAAAAAAAACT	NA	0.37581	-0.0714	0.008377	1.554e-17	35559
Ferkingstad	19237_17_DDT_D_dopachrome_decarboxylase	rs41277305	chr22	24005171	C	A	0.03485	0.3432	0.022527	2.059e-52	35559
Ferkingstad	19238_12_GLUL_GLNA	rs4652700	chr1	182367894	CAAAAAAAAAAACA	NA	0.58475	0.0526	0.008196	1.386e-10	35559
Ferkingstad	19241_31_RBP5_RBP_III	rs2290239	chr12	7123655	A	G	0.68166	0.169	0.008758	5.72e-83	35559
Ferkingstad	19251_56_SRGN_Platelet_proteoglycan	rs67852477	chr10	69097207	G	C	0.00795	-0.965	0.042869	3.284e-112	35559
Ferkingstad	19262_219_ACADVL_ACADV	rs507506	chr17	7215003	G	A	0.55807	-0.0482	0.00792	1.157e-09	35559
Ferkingstad	19266_35_G3BP1_G3BP1	rs140252175	chr5	151804337	CA	NA	0.28938	-0.0693	0.008855	5.049e-15	35559
Ferkingstad	19267_14_HAGH_GLO2	rs116869551	chr16	1826618	T	C	0.13901	0.2125	0.011765	6.285e-73	35559
Ferkingstad	19270_26_YARS_SYYC	rs748322977	chr1	32786957	G	A	0.00133	-0.7655	0.104466	2.34e-13	35559
Ferkingstad	19273_3_GSR_Glutathione_reductase	rs191237215	chr8	30749350	A	G	0.00155	-2.1828	0.102533	1.445e-100	35559
Ferkingstad	19277_4_TSTD1_KAT	rs10908821	chr1	161038745	G	C	0.10261	0.4921	0.013328	1e-200	35559
Ferkingstad	19279_42_RBP1_CRBP	rs2071387	chr3	139538761	G	A	0.20571	0.0901	0.009768	2.86e-20	35559
Ferkingstad	19289_29_UROD_DCUP	rs12749939	chr1	45012761	T	C	0.28789	-0.2709	0.008624	1e-200	35559
Ferkingstad	19293_6_VPS26A_VP26A	rs10998638	chr10	69201349	C	G	0.23826	-0.1841	0.009461	2.453e-84	35559
Ferkingstad	19297_4_G6PD_G6PD	rs147967693	chrX	154410919	T	C	0.07235	-0.1069	0.014037	2.624e-14	35559
Ferkingstad	19303_64_PET117_PT117	rs760097917	chr20	18138002	T	C	0.00027	1.9119	0.26538	5.831e-13	35559
Ferkingstad	19334_62_TXNDC12_TXD12	rs142834436,rs777117157	chr1	52055186	C	NA	0.0889	-0.1726	0.01412	2.325e-34	35559
Ferkingstad	19338_3_LZIC_LZIC	rs4265433	chr1	10065497	G	A	0.97762	0.1684	0.026857	3.604e-10	35559
Ferkingstad	19357_11_VAMP7_VAMP7	rs1053475241	chrX	155930663	AATA	NA	0.00054	0.3236	0.158976	0.041798	35559
Ferkingstad	19357_11_VAMP7_VAMP7	rs4893107	chrX	155930663	ATTT	NA	0.56258	0.0574	0.007393	8.244e-15	35559
Ferkingstad	19361_78_MATN3_MATN3	rs375765000,rs8176066	chr2	20012707	GCCTCGGGCCCCGCCCCGCCCC	NA	0.57261	-0.3619	0.006085	1e-200	35559
Ferkingstad	19365_11_BCAT2_BCAT2	rs4801775	chr19	48800787	ACCTAGTTTTTTTTTC	NA	0.23158	-0.164	0.009317	2.383e-69	35559
Ferkingstad	19367_34_DCI_D3D2	rs11541763	chr16	2251519	C	G	0.1648	-0.1925	0.010878	4.417e-70	35559
Ferkingstad	19372_7_MDGA2_MDGA2	rs78456802	chr14	47792052	GTTG	NA	0.13405	0.627	0.00845	1e-200	35559
Ferkingstad	19372_7_MDGA2_MDGA2	rs150235718	chr14	47792052	TTTT	NA	0.03179	-0.1551	0.02363	5.253e-11	35559
Ferkingstad	19376_74_NNMT_NNMT	rs2604277	chr11	114308380	A	T	0.94813	0.1274	0.018188	2.479e-12	35559
Ferkingstad	19377_14_OLFM2_NOE2	rs11669788	chr19	9948131	T	C	0.33554	0.6292	0.006461	1e-200	35559
Ferkingstad	19383_131_CINP_CINP	rs3759562	chr14	102365480	G	A	0.26759	-0.0555	0.008867	3.877e-10	35559
Ferkingstad	19446_1_GMPR2_GMPR2	rs34354104	chr14	24238273	A	G	0.05894	-0.4966	0.017108	2.993e-185	35559
Ferkingstad	19448_104_UPP1_UPP1	rs6950051	chr7	47990536	T	C	0.06977	0.1593	0.015503	9.083e-25	35559
Ferkingstad	19482_11_HDHD3_HDHD3	rs1043836	chr9	113373918	T	C	0.62962	0.1773	0.008364	9.843e-100	35559
Ferkingstad	19488_1_PDCD6_PDCD6	rs111451538	chr5	306692	A	G	0.0053	-1.3364	0.05592	3.186e-126	35559
Ferkingstad	19496_1_NPL_NPL	rs74646646	chr1	182909529	C	T	0.0233	0.4351	0.026566	2.731e-60	35559
Ferkingstad	19504_22_DTYMK_KTHY	rs756929774	chr2	241686732	T	C	0.00199	-1.4883	0.090413	6.986e-61	35559
Ferkingstad	19523_215_PARK7_PARK7	rs779634316	chr1	7969434	TAAAGCTGGGGGAGGGGAA	NA	0.00051	-0.0267	0.169378	0.874744	35559
Ferkingstad	19523_215_PARK7_PARK7	rs372754391	chr1	7969434	TAAAGCTGGGGGGGGAAAA	NA	0.00292	-0.102	0.070725	0.149243	35559
Ferkingstad	19523_215_PARK7_PARK7	rs532014954,rs549087588	chr1	7969434	TAAAGCTGGGGGGGGGGGAA	NA	0.008	0.0514	0.045618	0.259853	35559
Ferkingstad	19556_12_CR1_Complement_receptor_type_1	rs10636258	chr1	207586124	TTGTGTG	NA	0.00156	0.1025	0.107549	0.340562	35559
Ferkingstad	19556_12_CR1_Complement_receptor_type_1	rs10636258,rs10682406	chr1	207586124	TTGTG	NA	0.41234	-0.2243	0.008614	1.731e-149	35559
Ferkingstad	19557_3_KLB_KLOTB	rs775921882	chr4	39453291	GACTTTAAAAA	NA	0.00129	0.3502	0.112747	0.001896	35559
Ferkingstad	19560_23_PLXNA4_PLXA4	rs6467443	chr7	132553252	T	G	0.18543	0.0997	0.010275	2.911e-22	35559
Ferkingstad	19561_216_PLXND1_PLXD1	rs6782700	chr3	129590304	AGGCT	NA	0.13065	-0.0286	0.012212	0.019187	35559
Ferkingstad	19563_3_SEZ6L_SEZ6L	rs73158619	chr22	26302786	A	G	0.03803	0.2238	0.021299	7.984e-26	35559
Ferkingstad	19581_15_IGFBP5_IGFBP_5	rs7598172	chr2	216813276	T	G	0.50104	-0.0504	0.007966	2.501e-10	35559
Ferkingstad	19590_46_SFTPD_SP_D	rs12357764	chr10	79995964	A	C	0.35184	0.5311	0.005424	1e-200	35559
Ferkingstad	19602_36_JUND_jun_D	rs10406080	chr19	18291332	G	C	0.65134	-0.0596	0.008297	6.813e-13	35559
Ferkingstad	19614_8_TCN1_Holo_TC_I	rs34324219	chr11	59855905	A	C	0.10898	-0.4887	0.013236	1e-200	35559
Ferkingstad	19615_213_NT5C3A_5NT3	rs4316067	chr7	33041902	G	A	0.27768	-0.0843	0.0088	9.776e-22	35559
Ferkingstad	19635_69_FGL2_FGL2	rs3834746,rs574096366	chr7	77201923	A	NA	0.01026	-0.0961	0.041744	0.021329	35559
Ferkingstad	19635_69_FGL2_FGL2	rs74272944	chr7	77201923	AAAT	NA	0.00074	-0.1236	0.139596	0.375936	35559
Ferkingstad	19635_69_FGL2_FGL2	rs3114360	chr7	77201923	AT	NA	0.16262	0.0166	0.011107	0.135032	35559
Ferkingstad	2190_55_F11_Coagulation_Factor_XI	rs2289252	chr4	186286227	T	C	0.38863	0.3333	0.006754	1e-200	35559
Ferkingstad	2201_17_COL18A1_Endostatin	rs144147445	chr21	45510178	A	G	0.00853	-0.9745	0.044056	2.04e-108	35559
Ferkingstad	2211_9_TIMP1_TIMP_1	rs141512610	chrX	47586621	A	G	0.0004	-1.9429	0.182601	1.938e-26	35559
Ferkingstad	2212_69_PLAT_tPA	rs2020921	chr8	42187447	A	G	0.03337	-0.5883	0.023011	3.627e-144	35559
Ferkingstad	2278_61_TIMP2_TIMP_2	rs9894212	chr17	78865858	G	C	0.2268	-0.0816	0.009887	1.536e-16	35559
Ferkingstad	2436_49_CXCL16_CXCL16__soluble	rs770178424	chr17	4738857	A	G	0.00267	-2.3501	0.087217	6.452e-160	35559
Ferkingstad	2474_54_APCS_SAP	rs146174215	chr1	159574733	C	A	0.03105	-0.5373	0.023542	2.692e-115	35559
Ferkingstad	2515_14_GFRA2_GFRa_2	rs15881	chr8	21693256	C	A	0.50488	0.3086	0.00843	1e-200	35559
Ferkingstad	2516_57_CCL21_6Ckine	rs770633538	chr9	35651547	TG	NA	0.00132	2.3356	0.11462	2.683e-92	35559
Ferkingstad	2567_5_CFI_Factor_I	rs13117504	chr4	109737700	G	C	0.3832	0.1976	0.008335	3.082e-124	35559
Ferkingstad	2571_12_IGFBP3_IGFBP_3	rs145188037	chr7	45914866	A	G	0.0176	1.0281	0.031093	1e-200	35559
Ferkingstad	2579_17_MMP9_MMP_9	rs2250889	chr20	46013767	C	G	0.95342	-0.1687	0.020335	1.077e-16	35559
Ferkingstad	2590_69_ROR1_ROR1	rs61765448	chr1	64146145	T	C	0.17112	-0.3004	0.010848	8.977e-169	35559
Ferkingstad	2602_2_ANGPT2_Angiopoietin_2	rs1968586	chr8	6421990	T	C	0.3488	-0.1308	0.00886	2.536e-49	35559
Ferkingstad	2611_72_TYRO3_Dtk	rs956068232	chr15	41558846	GGGC	NA	0.00065	-0.5913	0.164442	0.0003234	35559
Ferkingstad	2614_28_EFNA4_Ephrin_A4	rs143886639	chr1	155066965	A	C	0.00022	-2.2129	0.337326	5.376e-11	35559
Ferkingstad	2617_56_ERBB3_ERBB3	rs75526830	chr12	56095610	G	A	0.00107	2.1719	0.118371	3.414e-75	35559
Ferkingstad	2620_4_IL6ST_gp130__soluble	rs7730934	chr5	55970684	A	G	0.12361	0.3693	0.012608	1.376e-188	35559
Ferkingstad	2631_50_IL10RB_IL_10_Rb	rs4455239	chr21	33281729	C	T	0.43466	0.0705	0.008117	3.766e-18	35559
Ferkingstad	2632_5_IL12RB1_IL_12_Rb1	rs429774	chr19	18075942	C	T	0.30493	-0.0791	0.008594	3.442e-20	35559
Ferkingstad	2633_52_IL13RA1_IL_13_Ra1	rs35301680	chrX	118782778	T	NA	0.13417	0.4596	0.008924	1e-200	35559
Ferkingstad	2635_61_LAYN_Layilin	rs4938792	chr11	111550211	C	T	0.37645	-0.0523	0.008322	3.294e-10	35559
Ferkingstad	2637_77_MRC1_Macrophage_mannose_receptor	rs71497225	chr10	17849736	C	G	0.79882	-0.6136	0.007694	1e-200	35559
Ferkingstad	2644_11_PRKCA_PKC_A	rs61762372	chr17	66302564	A	G	0.36962	0.0808	0.00848	1.602e-21	35559
Ferkingstad	2647_66_GDI2_Rab_GDP_dissociation_inhibitor_beta	rs201986028	chr10	5715643	G	NA	0.03509	0.0053	0.021959	0.809275	35559
Ferkingstad	2647_66_GDI2_Rab_GDP_dissociation_inhibitor_beta	rs138555148,rs372836365,rs879804816	chr10	5715643	T	NA	0.61834	0.0938	0.008202	2.735e-30	35559
Ferkingstad	2647_66_GDI2_Rab_GDP_dissociation_inhibitor_beta	rs11598394	chr10	5715643	TT	NA	0.34657	-0.0984	0.008367	6.285e-32	35559
Ferkingstad	2654_19_TNFRSF1A_TNF_sR_I	rs4149584	chr12	6333477	T	C	0.02047	-0.4263	0.029113	1.497e-48	35559
Ferkingstad	2665_26_TNFRSF17_BCMA	rs11570136	chr16	11964975	A	T	0.35441	-0.1343	0.008724	1.794e-53	35559
Ferkingstad	2677_1_EGFR_ERBB1	rs13244925	chr7	55124563	C	A	0.58318	-0.102	0.008323	1.574e-34	35559
Ferkingstad	2681_23_HGF_HGF	rs5745686,rs796107510	chr7	81729800	CA	NA	0.79274	0.126	0.01	2.124e-36	35559
Ferkingstad	2681_23_HGF_HGF	rs766919858	chr7	81729800	C	NA	0.0002	-0.2486	0.296531	0.401828	35559
Ferkingstad	2692_74_PLA2G2A_NPS_PLA2	rs11573156	chr1	19979653	C	G	0.25614	0.7671	0.00707	1e-200	35559
Ferkingstad	2700_56_PROS1_Protein_S	rs930814	chr3	94256084	C	G	0.03123	-0.1855	0.023519	3.092e-15	35559
Ferkingstad	2705_5_CCL25_TECK	rs74959615	chr19	8056212	A	G	0.08393	-1.1212	0.010606	1e-200	35559
Ferkingstad	2731_29_POR_NADPH_P450_Oxidoreductase	rs59882870	chr7	76009103	A	G	0.16061	0.193	0.010811	2.779e-71	35559
Ferkingstad	2737_22_NOV_NovH	rs776843693	chr8	119405348	TA	NA	0.24106	0.0789	0.009407	4.954e-17	35559
Ferkingstad	2741_22_SIGLEC6_Siglec_6	rs3217679,rs397819587	chr19	51527502	ATAC	NA	0.61317	-0.5834	0.006273	1e-200	35559
Ferkingstad	2742_68_SIGLEC7_Siglec_7	rs140185670	chr19	51142883	C	G	0.08558	-0.5453	0.015097	1e-200	35559
Ferkingstad	2743_5_SHH_Sonic_Hedgehog	rs10225292	chr7	156380544	C	T	0.34802	-0.0928	0.008731	2.183e-26	35559
Ferkingstad	2771_35_IGFBP1_IGFBP_1	rs3828998	chr7	45889209	C	T	0.38793	-0.0769	0.008144	3.641e-21	35559
Ferkingstad	2774_10_IL16_IL_16	rs17875523	chr15	81304211	T	C	0.08693	-1.0639	0.010912	1e-200	35559
Ferkingstad	2778_10_IL22_IL_22	rs139977220	chr12	68267650	A	G	0.05234	0.1259	0.017808	1.549e-12	35559
Ferkingstad	2781_63_CCL4L1_LAG_1	rs76450054	chr17	36160818	A	C	0.60409	0.1299	0.008373	2.778e-54	35559
Ferkingstad	2789_26_MMP7_MMP_7	rs11568819	chr11	102530902	A	G	0.0663	0.5694	0.016823	1e-200	35559
Ferkingstad	2797_56_APOB_Apo_B	rs563290	chr2	21065354	A	G	0.85985	0.0874	0.012143	6.143e-13	35559
Ferkingstad	2813_11_AGRP_ART	rs142810988,rs34745420,rs377141973	chr16	67522025	T	NA	0.03991	0.5105	0.019944	1.663e-144	35559
Ferkingstad	2813_11_AGRP_ART	rs774444608,rs891960120	chr16	67522025	TTTTG	NA	0.00068	-0.1773	0.177172	0.316961	35559
Ferkingstad	2816_50_BCAM_BCAM	rs28399656	chr19	44813447	A	T	0.01537	1.4812	0.026205	1e-200	35559
Ferkingstad	2819_23_CDH5_Cadherin_5	rs11649312	chr16	66395395	A	G	0.68547	0.1525	0.008668	2.75e-69	35559
Ferkingstad	2826_53_EDA_EDA	rs2274469	chrX	70023268	A	T	0.16983	0.4641	0.008151	1e-200	35559
Ferkingstad	2827_23_CX3CL1_Fractalkine_CX3CL_1	rs62037084	chr16	57379748	T	C	0.00481	0.7445	0.059089	2.122e-36	35559
Ferkingstad	2831_29_KLK11_Kallikrein_11	rs1048328	chr19	51024108	A	G	0.06427	-1.4812	0.012429	1e-200	35559
Ferkingstad	2834_54_KLK8_kallikrein_8	rs74705037	chr19	51001552	A	G	0.02708	0.8629	0.025492	1e-200	35559
Ferkingstad	2836_68_LCN2_Lipocalin_2	rs3814526	chr9	128148408	G	A	0.03943	-0.1541	0.02132	4.899e-13	35559
Ferkingstad	2837_3_MET_Met	rs10435378	chr7	116785439	A	G	0.55983	0.1309	0.008365	3.41e-55	35559
Ferkingstad	2844_53_TIE1_sTie_1	rs769027877	chr1	43305084	A	G	0.00384	2.215	0.067394	1e-200	35559
Ferkingstad	2851_63_C5_C5a	rs17220750	chr9	121025721	A	G	0.10741	0.186	0.012762	4.105e-48	35559
Ferkingstad	2855_49_MAPK3_ERK_1	rs112399781,rs58797067	chr16	30134463	GC	NA	0.39633	0.2376	0.008216	6.967e-184	35559
Ferkingstad	2864_2_MAP2K1_MEK1	rs60289963,rs71450114	chr15	66472303	CAAA	NA	0.13982	0.1072	0.011604	2.498e-20	35559
Ferkingstad	2864_2_MAP2K1_MEK1	rs112293876	chr15	66472303	CA	NA	0.26154	-0.04	0.009107	1.123e-05	35559
Ferkingstad	2888_49_C7_C7	rs74480769	chr5	40972109	G	A	0.02191	-1.2803	0.022097	1e-200	35559
Ferkingstad	2890_59_CCL28_CCL28	rs7703662	chr5	43420061	G	T	0.52394	-0.0551	0.008212	1.955e-11	35559
Ferkingstad	2900_53_CCL14_HCC_1	rs7222922	chr17	36008654	T	C	0.08158	-0.8559	0.011749	1e-200	35559
Ferkingstad	2911_27_MDK_Midkine	rs77817298	chr11	46506102	A	G	0.01498	0.381	0.034364	1.447e-28	35559
Ferkingstad	2913_1_CCL23_MPIF_1	rs41341749	chr17	35983666	G	A	0.03665	0.6056	0.022038	3.032e-166	35559
Ferkingstad	2925_9_SERPINE1_PAI_1	rs775990442	chr7	101184007	GTGTGTATATATATAGAGAG	NA	0.00321	-0.1817	0.073798	0.013811	35559
Ferkingstad	2925_9_SERPINE1_PAI_1	rs754267780	chr7	101184007	GTGTGTGTATATATATATATAGAGAG	NA	0.00292	-0.0443	0.074221	0.550597	35559
Ferkingstad	2948_58_GHR_Growth_hormone_receptor	rs4610468	chr5	42634119	C	T	0.22985	-0.2092	0.009739	2.363e-102	35559
Ferkingstad	2950_57_IGFBP4_IGFBP_4	rs4890114	chr17	40447297	G	A	0.45287	0.0556	0.008068	5.529e-12	35559
Ferkingstad	2960_66_CFP_Properdin	rs2765815	chrX	47634335	A	G	0.29019	0.0835	0.008021	2.215e-25	35559
Ferkingstad	2961_1_PROC_Protein_C	rs61185143	chr2	127407902	C	T	0.57164	0.1422	0.008011	1.716e-70	35559
Ferkingstad	2962_50_PTHLH_PTHrP	rs11049365	chr12	28138401	A	C	0.27057	0.1225	0.008925	7.177e-43	35559
Ferkingstad	2968_61_TNFSF15_TNFSF15	rs56339337	chr9	114798680	G	A	0.13304	-0.0718	0.011737	9.505e-10	35559
Ferkingstad	2973_15_CD36_CD36_ANTIGEN	rs757518184	chr7	80672015	ATAGGACATACTTGGATATTGAACC	A	0.0023	-2.3306	0.08587	3.222e-162	35559
Ferkingstad	2974_61_CNTN1_contactin_1	rs1838343	chr12	40802428	T	C	0.45962	-0.1995	0.0083	1.14e-127	35559
Ferkingstad	2977_7_EDAR_EDAR	rs260675	chr2	108983663	C	NA	0.98733	-1.5378	0.029062	1e-200	35559
Ferkingstad	2979_8_CXCL5_ENA_78	rs352045	chr4	73998970	G	T	0.84676	-0.1975	0.010906	2.724e-73	35559
Ferkingstad	2982_82_LGALS4_Galectin_4	rs883394	chr19	38714973	T	C	0.47527	-0.0533	0.008071	4.001e-11	35559
Ferkingstad	2985_35_CXCL1_Gro_a	rs10007826	chr4	73874452	G	C	0.17884	0.7845	0.007737	1e-200	35559
Ferkingstad	2991_9_IL1R1_IL_1_sRI	rs7588201	chr2	102129816	C	A	0.27984	-0.1891	0.009009	8.028e-98	35559
Ferkingstad	2992_59_IL17RA_IL_17_sR	rs2241047	chr22	17105693	G	C	0.51795	0.9682	0.004638	1e-200	35559
Ferkingstad	2993_1_IL18RAP_IL_18_Rb	rs4851010	chr2	102439667	T	A	0.32583	0.0815	0.008514	1.045e-21	35559
Ferkingstad	2994_71_IL1RL2_IL_1Rrp2	rs3917265	chr2	102162001	C	T	0.56001	-0.1573	0.008132	2.37e-83	35559
Ferkingstad	2999_6_LSAMP_LSAMP	rs1541871	chr3	116383969	C	T	0.84864	0.2016	0.01141	7.374e-70	35559
Ferkingstad	3003_29_NCR3_NKp30	rs77661047,rs9281511	chr6	31498818	GTCTCCTC	NA	0.53091	0.0288	0.007989	0.0003121	35559
Ferkingstad	3004_67_PDCD1LG2_PD_L2	rs16923189	chr9	5510644	G	A	0.2871	0.347	0.007393	1e-200	35559
Ferkingstad	3009_3_TGFBR3_TGF_b_R_III	rs769783512	chr1	91719322	C	T	0.00133	-1.6724	0.112144	2.716e-50	35559
Ferkingstad	3025_50_FGF2_bFGF	rs2922979	chr4	122827461	G	NA	0.34716	-0.5655	0.006573	1e-200	35559
Ferkingstad	3028_36_CCL23_Ck_b_8_1	rs712048	chr17	35999179	A	C	0.09333	-0.7401	0.011037	1e-200	35559
Ferkingstad	3029_52_CD209_DC_SIGN	rs4804774	chr19	7707287	C	G	0.21725	-0.3583	0.009517	1e-200	35559
Ferkingstad	3033_57_LGALS2_Galectin_2	rs5756736	chr22	37574182	A	G	0.56253	-0.2069	0.00798	3.262e-148	35559
Ferkingstad	3041_55_MRC2_MRC2	rs113859572	chr17	62664946	T	C	0.02075	0.719	0.028538	4.635e-140	35559
Ferkingstad	3043_49_SPARC_ON	rs200777949	chr5	151667469	A	G	0.00215	-1.1816	0.08533	1.319e-43	35559
Ferkingstad	3045_72_PTN_PTN	rs320682	chr7	137353346	C	T	0.44714	0.1905	0.008063	2.049e-123	35559
Ferkingstad	3046_31_RETN_resistin	rs3745368	chr19	7670411	A	G	0.03859	-0.6658	0.022532	6.634e-192	35559
Ferkingstad	3049_61_PRSS1_Trypsin	rs62473563	chr7	142771005	T	C	0.0828	0.1184	0.015391	1.442e-14	35559
Ferkingstad	3050_7_VWF_vWF	rs1800382	chr12	6019222	T	C	0.0072	-1.265	0.047127	1.029e-158	35559
Ferkingstad	3066_12_LGALS3_Galectin_3	rs118083722	chr14	55129494	A	G	0.08895	-0.5703	0.011608	1e-200	35559
Ferkingstad	3073_51_IL18BP_IL_18_BPa	rs548617381	chr11	71700749	T	C	0.00436	-0.3935	0.064258	9.142e-10	35559
Ferkingstad	3079_62_RARRES2_TIG2	rs883138	chr7	150345704	C	A	0.26058	0.2491	0.009258	1.915e-159	35559
Ferkingstad	3083_71_EDA2R_XEDAR	rs73219571	chrX	66484095	T	C	0.01603	-0.213	0.028298	5.192e-14	35559
Ferkingstad	3132_1_VEGFC_VEGF_C	rs41278571	chr4	176729712	T	C	0.02002	0.404	0.02849	1.212e-45	35559
Ferkingstad	3143_3_CD4_sCD4	rs61916271	chr12	6781356	A	G	0.20984	-0.0607	0.009746	4.715e-10	35559
Ferkingstad	3151_6_IL2RA_IL_2_sRa	rs12722497	chr10	6053965	A	NA	0.06158	0.1501	0.016176	1.707e-20	35559
Ferkingstad	3166_92_CD33_Siglec_3	rs12459419	chr19	51225221	T	C	0.34971	-1.0779	0.004956	1e-200	35559
Ferkingstad	3168_8_ADAMTS5_ADAMTS_5	rs151058	chr21	26939253	C	T	0.87921	0.5607	0.010472	1e-200	35559
Ferkingstad	3169_70_IDUA_IDUA	rs34931738,rs397880261,rs398082814	chr4	959405	T	TC	0.55425	0.4497	0.005968	1e-200	35559
Ferkingstad	3171_57_APP_amyloid_precursor_protein	rs439826	chr21	26156328	G	T	0.68291	-0.0779	0.008786	7.566e-19	35559
Ferkingstad	3172_28_ARSB_ARSB	rs11743362	chr5	78880898	A	G	0.49507	-0.1293	0.007782	5.369e-62	35559
Ferkingstad	3173_49_NAAA_ASAHL	rs55967764	chr4	75919627	T	C	0.27007	-0.6054	0.006038	1e-200	35559
Ferkingstad	3175_51_ADAMTS13_ATS13	rs28647808	chr9	133440409	G	C	0.10599	-0.8811	0.009132	1e-200	35559
Ferkingstad	3184_25_F7_Coagulation_Factor_VII	rs6046	chr13	113118845	A	G	0.11253	-1.2451	0.009631	1e-200	35559
Ferkingstad	3191_50_WFIKKN1_WFKN1	rs55798945	chr16	619708	G	T	0.36015	0.1487	0.008403	4.497e-70	35559
Ferkingstad	3195_50_GNLY_Granulysin	rs12151742	chr2	85705880	T	C	0.21861	0.8116	0.006738	1e-200	35559
Ferkingstad	3198_4_IDS_IDS	rs985081	chrX	149456568	C	T	0.16409	-0.0757	0.009611	3.376e-15	35559
Ferkingstad	3199_54_KLK12_kallikrein_12	rs3745540	chr19	51031874	G	A	0.58149	-0.1384	0.008253	4.12e-63	35559
Ferkingstad	3204_2_LTA4H_LKHA4	rs34665243	chr12	96048159	TC	NA	0.49097	0.0493	0.008083	1.068e-09	35559
Ferkingstad	3206_4_LYVE1_LYVE1	rs116055980	chr11	10597218	G	A	0.04906	0.4138	0.019411	7.828e-101	35559
Ferkingstad	3210_1_METAP1_METAP1	rs7676259	chr4	99021498	G	A	0.61295	-0.0655	0.008345	4.187e-15	35559
Ferkingstad	3212_30_ASAH2_ASAH2	rs4444026	chr10	50270141	T	A	0.82074	0.5357	0.008123	1e-200	35559
Ferkingstad	3216_2_PIGR_PIGR	rs748844	chr1	206936501	A	G	0.39793	-0.1423	0.008399	2.196e-64	35559
Ferkingstad	3220_40_RET_RET	rs2435359	chr10	43084567	G	A	0.73745	0.3379	0.009151	1e-200	35559
Ferkingstad	3221_54_SFRP1_SARP_2	rs72643819	chr8	41309674	T	G	0.41814	-0.1577	0.008493	5.874e-77	35559
Ferkingstad	3232_28_ACP5_TrATPase	rs10403399	chr19	11595843	G	C	0.28099	0.2349	0.009326	5.466e-140	35559
Ferkingstad	3234_23_CCDC80_URB	rs3083372,rs398062697	chr3	112654969	G	GCC	0.62926	-0.094	0.008477	1.413e-28	35559
Ferkingstad	3235_50_WFIKKN2_WFKN2	rs11079936	chr17	50830473	C	T	0.71027	-0.5313	0.006983	1e-200	35559
Ferkingstad	3280_49_ACAN_Aggrecan	rs34949187	chr15	88843421	A	G	0.16378	-0.1415	0.010752	1.491e-39	35559
Ferkingstad	3284_75_BGN_BGN	rs743641	chrX	153508696	T	A	0.0864	-0.1445	0.013259	1.17e-27	35559
Ferkingstad	3290_50_CD109_CD109	rs4708089	chr6	73804430	G	A	0.43125	0.5242	0.005756	1e-200	35559
Ferkingstad	3291_30_FCER2_CD23	rs2277989	chr19	7696926	G	A	0.44988	-0.2702	0.00856	1e-200	35559
Ferkingstad	3292_75_CD48_CD48	rs150735389	chr1	160681231	A	G	0.00549	-2.1105	0.04352	1e-200	35559
Ferkingstad	3293_2_CD5L_CD5L	rs2765501	chr1	157834858	A	G	0.46691	0.2995	0.008306	1e-200	35559
Ferkingstad	3296_92_CNTN2_CNTN2	rs2071533	chr1	205043070	G	T	0.90299	-0.9554	0.009975	1e-200	35559
Ferkingstad	3298_52_CNTN4_Contactin_4	rs163352	chr3	3056357	C	G	0.80105	-0.2871	0.010793	6.856e-156	35559
Ferkingstad	3299_29_CNTN5_Contactin_5	rs10706977	chr11	99235051	TTTTTTTTTG	NA	0.2162	0.0043	0.009769	0.659811	35559
Ferkingstad	3302_58_CST7_CYTF	rs142751091	chr20	24926225	G	C	0.23801	-0.6841	0.006854	1e-200	35559
Ferkingstad	3305_6_DLL4_DLL4	rs35748882	chr15	40935116	T	C	0.02345	0.1821	0.026372	5.021e-12	35559
Ferkingstad	3309_2_FCGR2A_FCG2A	rs1801274	chr1	161509955	G	A	0.5595	1.2362	0.003876	1e-200	35559
Ferkingstad	3310_62_FCGR2B_FCG2B	rs1674777	chr1	161673537	G	C	0.24617	1.2867	0.004709	1e-200	35559
Ferkingstad	3314_74_GFRA1_GFRa_1	rs4550150	chr10	116226964	A	G	0.27399	0.1978	0.009184	7.045e-103	35559
Ferkingstad	3316_58_SERPIND1_Heparin_cofactor_II	rs117226528	chr22	20960427	A	C	0.00107	-2.217	0.148461	2.004e-50	35559
Ferkingstad	3322_52_LRIG3_LRIG3	rs768716699	chr12	58886808	T	A	0.00658	2.5501	0.039485	1e-200	35559
Ferkingstad	3324_51_LY9_LY9	rs1491253919	chr1	160805741	ACACACACACACACACA	NA	0.00021	-0.8034	0.426692	0.05972	35559
Ferkingstad	3324_51_LY9_LY9	rs1470160310	chr1	160805741	ACACACACACA	NA	0.00232	0.4112	0.087691	2.743e-06	35559
Ferkingstad	3324_51_LY9_LY9	rs141980451	chr1	160805741	TCACACACACACACACACACACACACA	NA	0.0084	-0.1458	0.0448	0.001136	35559
Ferkingstad	3324_51_LY9_LY9	rs374532993,rs60721619,rs67777796	chr1	160805741	TCACACACACACACACA	NA	0.09184	-0.1254	0.014575	7.697e-18	35559
Ferkingstad	3324_51_LY9_LY9	rs1489306240	chr1	160805741	TCACACACACACACA	NA	0.03514	0.2325	0.023087	7.438e-24	35559
Ferkingstad	3324_51_LY9_LY9	rs369917545,rs67777796	chr1	160805741	TCACACACACACA	NA	0.2009	0.5191	0.007781	1e-200	35559
Ferkingstad	3324_51_LY9_LY9	rs200188824	chr1	160805741	T	NA	0.00028	0.1699	0.269708	0.528734	35559
Ferkingstad	3325_2_MATN2_MATN2	rs78548919	chr8	98052647	T	C	0.19661	0.1376	0.010382	4.331e-40	35559
Ferkingstad	3326_58_CADM1_Nectin_like_protein_2	rs11215406	chr11	115194362	C	T	0.31628	0.1517	0.008662	1.135e-68	35559
Ferkingstad	3327_27_NTN4_NET4	rs34114770	chr12	95787307	A	G	0.00446	1.3419	0.061626	3.998e-105	35559
Ferkingstad	3329_14_PGLYRP1_PGRP_S	rs2072563	chr19	46023390	A	G	0.31858	-0.1912	0.008708	7.363e-107	35559
Ferkingstad	3331_8_RGMB_RGMB	rs61048056	chr5	98439496	G	A	0.56042	0.1424	0.008251	9.819e-67	35559
Ferkingstad	3336_50_TFPI_TFPI	rs116350534	chr2	187479035	G	T	0.00984	-0.273	0.042176	9.611e-11	35559
Ferkingstad	3340_53_THBS4_TSP4	rs13167730	chr5	80074424	T	G	0.08121	0.3753	0.015294	5.645e-133	35559
Ferkingstad	3343_1_ACY1_Aminoacylase_1	rs121912698	chr3	51988821	T	C	0.00704	-1.4667	0.048714	3.772e-199	35559
Ferkingstad	3344_60_SERPINC1_Antithrombin_III	rs757753543	chr1	173976500	T	C	0.00081	-1.8363	0.14308	1.056e-37	35559
Ferkingstad	3348_49_BMP1_BMP_1	rs148697295	chr8	22165138	AGTCGGAGGGAGGGAGGGA	NA	0.25198	0.0284	0.009641	0.003222	35559
Ferkingstad	3348_49_BMP1_BMP_1	rs1491405526	chr8	22165138	GGGAGTCGGAGGGAGGGAGGGA	NA	0.03042	-0.0456	0.02394	0.056816	35559
Ferkingstad	3352_80_CA6_Carbonic_anhydrase_6	rs3765963	chr1	8974539	G	A	0.43131	0.5851	0.005748	1e-200	35559
Ferkingstad	3364_76_CTSV_Cathepsin_V	rs10981322	chr9	97241890	AGGGGGGCCTT	NA	0.00292	-0.0898	0.073602	0.222434	35559
Ferkingstad	3364_76_CTSV_Cathepsin_V	rs796421526	chr9	97241890	GGGGGGGCTC	NA	0.21418	-0.1234	0.00997	3.499e-35	35559
Ferkingstad	3366_51_ECM1_ECM1	rs3737240	chr1	150510879	T	C	0.34057	-0.6725	0.005963	1e-200	35559
Ferkingstad	3367_8_FETUB_FETUB	rs114780909	chr3	186642466	A	T	0.00479	-1.8645	0.058464	1e-200	35559
Ferkingstad	3376_49_IL17RD_IL_17_RD	rs1077034	chr3	57104199	TA	NA	0.14573	0.5402	0.009583	1e-200	35559
Ferkingstad	3378_49_KLK7_Kallikrein_7	rs1624358	chr19	50983919	G	T	0.91465	0.5287	0.015174	1e-200	35559
Ferkingstad	3389_7_SERPINA5_PCI	rs6119	chr14	94587675	G	A	0.10115	0.3471	0.013344	3.737e-149	35559
Ferkingstad	3396_54_REN_Renin	rs193280350	chr1	204179521	A	G	0.00694	1.0733	0.049639	1.109e-103	35559
Ferkingstad	3403_1_TPSB2_TPSB2	rs34008574,rs397934170	chr16	1244909	AG	NA	0.53409	-1.0635	0.004096	1e-200	35559
Ferkingstad	3415_61_IBSP_BSP	rs2616262	chr4	87802058	T	G	0.48757	-0.0944	0.00813	3.592e-31	35559
Ferkingstad	3420_21_CA13_Carbonic_anhydrase_XIII	rs6987314	chr8	85227011	A	G	0.09058	-0.5843	0.011292	1e-200	35559
Ferkingstad	3431_54_EPHA1_EphA1	rs4725617	chr7	143400007	G	A	0.89903	1.2036	0.010313	1e-200	35559
Ferkingstad	3438_10_FSTL3_FSTL3	rs1057093160	chr19	677392	A	G	0.0079	-0.4129	0.045555	1.261e-19	35559
Ferkingstad	3440_7_GZMA_granzyme_A	rs202102393	chr5	55110151	A	G	0.00611	-1.7034	0.054901	1e-200	35559
Ferkingstad	3445_53_IL15RA_IL_15_Ra	rs368189864	chr10	5985253	AGATGGGGCCAGGCAGAGGGGAGGATGGCGGACGGGGCCAGGCAG	NA	0.61169	0.0566	0.008176	4.438e-12	35559
Ferkingstad	3447_64_CXCL8_IL_8	rs776824140	chr4	72363829	C	T	0.00013	2.1858	0.2742	1.567e-15	35559
Ferkingstad	3448_13_INSR_IR	rs67787836	chr19	7184809	AC	NA	0.533	0.0749	0.008376	3.807e-19	35559
Ferkingstad	3448_13_INSR_IR	rs532286558	chr19	7184809	GCAT	NA	0.00144	0.079	0.116975	0.499447	35559
Ferkingstad	3457_57_POSTN_Periostin	rs117103342	chr13	37582401	T	C	0.01379	-0.8004	0.035069	2.668e-115	35559
Ferkingstad	3459_49_PDGFRB_PDGF_Rb	rs3816018	chr5	150128912	T	C	0.52174	1.182	0.004537	1e-200	35559
Ferkingstad	3461_58_BCAN_PGCB	rs2365715	chr1	156645322	G	A	0.39424	-0.1979	0.00836	6.923e-124	35559
Ferkingstad	3470_1_SELE_sE_Selectin	rs3917390	chr1	169735413	C	NA	0.67367	-0.1154	0.008604	5.078e-41	35559
Ferkingstad	3481_87_XPNPEP1_XPNPEP1	rs77846594	chr10	109790629	T	C	0.00345	-0.6445	0.072197	4.378e-19	35559
Ferkingstad	3484_60_AGT_Angiotensinogen	rs2071404	chr1	230715194	A	C	0.09293	0.2772	0.013635	6.872e-92	35559
Ferkingstad	3488_64_CAT_Catalase	rs769218	chr11	34449132	A	G	0.21994	-0.212	0.009637	2.994e-107	35559
Ferkingstad	3495_15_CXCL6_GCP_2	rs16850073	chr4	73838282	T	C	0.38847	0.6505	0.005868	1e-200	35559
Ferkingstad	3499_77_IL17B_IL_17B	rs746355945	chr5	149379267	G	GGAACCCCA	0.0032	0.6622	0.068514	4.241e-22	35559
Ferkingstad	3504_58_HAMP_LEAP_1	rs185716928	chr19	35351419	A	G	0.00137	-0.7069	0.107421	4.683e-11	35559
Ferkingstad	3508_78_CCL22_MDC	rs41398344	chr16	57360481	C	T	0.02038	-1.1217	0.022495	1e-200	35559
Ferkingstad	3516_60_CXCL12_SDF_1	rs1023264	chr10	44398308	T	C	0.74169	-0.1449	0.009377	7.164e-54	35559
Ferkingstad	3519_3_CCL17_TARC	rs28695417	chr16	57410006	A	G	0.07461	0.3985	0.015945	7.567e-138	35559
Ferkingstad	3534_14_CD40LG_CD40_ligand__soluble	rs368670267	chrX	136648045	TTAAAAAAAAAAAAAAAAAAC	NA	0.01974	0.0379	0.027074	0.161559	35559
Ferkingstad	3534_14_CD40LG_CD40_ligand__soluble	rs911725747	chrX	136648045	TTAAAAAAAAAAAAAACAAC	NA	0.00022	-0.0153	0.307906	0.960369	35559
Ferkingstad	3534_14_CD40LG_CD40_ligand__soluble	rs184119101	chrX	136648045	TTAAAAAAAAAAAAACAAAC	NA	0.00926	-0.0889	0.03883	0.022051	35559
Ferkingstad	3534_14_CD40LG_CD40_ligand__soluble	rs78541816	chrX	136648045	TTAAAAAAAAAAAACAAAAC	NA	0.02902	-0.1198	0.021292	1.84e-08	35559
Ferkingstad	3534_14_CD40LG_CD40_ligand__soluble	rs36206512	chrX	136648045	TTAAAAAAAAAAACAAAAAC	NA	0.03152	-0.1718	0.02093	2.244e-16	35559
Ferkingstad	3554_24_ADIPOQ_Adiponectin	rs143257534	chr3	186834099	T	C	0.03444	-0.6346	0.02397	1.877e-154	35559
Ferkingstad	3580_25_SERPINA1_a1_Antitrypsin	rs1243167	chr14	94375304	A	G	0.26992	0.4096	0.007072	1e-200	35559
Ferkingstad	3581_53_AHSG_a2_HS_Glycoprotein	rs4686790	chr3	186604193	T	G	0.70652	0.3568	0.007573	1e-200	35559
Ferkingstad	3583_54_ARSA_Arylsulfatase_A	rs6151419	chr22	50626486	GA	NA	0.13719	-0.105	0.011349	2.2e-20	35559
Ferkingstad	3587_53_BMP10_BMP10	rs150404607	chr2	68655516	A	G	0.00907	-0.2609	0.042208	6.36e-10	35559
Ferkingstad	3593_72_CASP3_Caspase_3	rs111667591	chr4	184671855	G	A	0.11822	-0.2269	0.012542	3.742e-73	35559
Ferkingstad	3600_2_CHIT1_Chitotriosidase_1	rs147080247	chr1	203217836	A	NA	0.00046	-0.6125	0.258522	0.017825	35559
Ferkingstad	3600_2_CHIT1_Chitotriosidase_1	rs150192398,rs3831317	chr1	203217836	GCCCAGTCCCTAGACCATGGCCCCG	NA	0.1965	-1.0733	0.006969	1e-200	35559
Ferkingstad	3607_71_DKK3_DKK3	rs11022114	chr11	12017327	A	G	0.33332	0.332	0.006955	1e-200	35559
Ferkingstad	3617_80_HGFAC_HGFA	rs2498323	chr4	3449382	A	G	0.09396	-1.5166	0.008643	1e-200	35559
Ferkingstad	3622_33_LGMN_LGMN	rs2236264	chr14	92732735	T	C	0.15307	-0.159	0.011472	1.112e-43	35559
Ferkingstad	3630_27_CADM3_Nectin_like_protein_1	rs144788078	chr1	159171311	C	T	0.01243	-0.2864	0.035022	2.894e-16	35559
Ferkingstad	3651_50_KDR_VEGF_sR2	rs34231037	chr4	55106779	G	A	0.02292	-0.8861	0.027002	1e-200	35559
Ferkingstad	3708_62_A2M_a2_Macroglobulin	rs201115819	chr12	9068811	A	G	0.00151	-1.8337	0.09866	4.168e-77	35559
Ferkingstad	3710_49_PLG_Angiostatin	rs143079629	chr6	160707780	A	G	0.00674	1.3634	0.050639	1.158e-159	35559
Ferkingstad	3719_2_CDKN1B_p27Kip1	rs111909987	chr12	12699174	G	C	0.09925	0.1207	0.013335	1.416e-19	35559
Ferkingstad	3727_35_PYY_PYY	rs529327957	chr17	43983263	ACAA	NA	0.00012	0.1015	0.305234	0.739488	35559
Ferkingstad	3727_35_PYY_PYY	rs62080325	chr17	43983263	G	NA	0.33361	0.0801	0.008521	5.42e-21	35559
Ferkingstad	3728_52_SCT_Secretin	rs780492636	chr11	658429	A	NA	0.0015	0.7258	0.096428	5.198e-14	35559
Ferkingstad	3728_52_SCT_Secretin	rs7937061	chr11	658429	AGA	NA	0.06653	-0.0465	0.015773	0.003198	35559
Ferkingstad	3773_15_TEK_sTie_2	rs682632	chr9	27183465	C	A	0.9403	-0.3853	0.017297	6.304e-110	35559
Ferkingstad	3799_11_CA3_Carbonic_anhydrase_III	rs2072696	chr8	85438822	C	G	0.24779	-0.1951	0.009333	4.983e-97	35559
Ferkingstad	3803_10_CST5_CYTD	rs35138163	chr20	23878078	A	T	0.19615	0.8043	0.006888	1e-200	35559
Ferkingstad	3805_16_ESM1_Endocan	rs4242051	chr5	54902947	C	T	0.75889	0.1479	0.009432	2.062e-55	35559
Ferkingstad	3806_55_EPHA5_EphA5	rs71657190	chr4	65599348	AACAC	NA	0.0648	0.1873	0.016285	1.293e-30	35559
Ferkingstad	3806_55_EPHA5_EphA5	rs1257103264	chr4	65599348	AACACAC	NA	0.00438	-0.1345	0.058225	0.020888	35559
Ferkingstad	3806_55_EPHA5_EphA5	rs71205393	chr4	65599348	AACACACACAC	NA	0.01592	-0.0725	0.032505	0.025717	35559
Ferkingstad	3807_1_FGF23_FGF23	rs6489536	chr12	4382743	C	G	0.37186	0.0516	0.0082	3.118e-10	35559
Ferkingstad	3810_50_FGR_FGR	rs3737801	chr1	27634321	G	C	0.06731	-0.2687	0.016206	9.757e-62	35559
Ferkingstad	3825_18_MAPK8_MK08	rs1997365	chr10	48299932	A	C	0.7081	0.0563	0.008881	2.309e-10	35559
Ferkingstad	3831_21_PTEN_pTEN	rs117002784	chr10	88147290	T	C	0.03828	0.1338	0.021219	2.867e-10	35559
Ferkingstad	3835_11_TLR2_TLR2	rs149780991	chr4	153773665	G	A	0.01201	-0.2239	0.035058	1.697e-10	35559
Ferkingstad	3848_14_GAPDH_GAPDH__liver	rs112761846,rs746484871,rs869032644	chr12	6485519	GATTTATTTATTT	NA	0.52912	-0.0516	0.008211	3.293e-10	35559
Ferkingstad	3848_14_GAPDH_GAPDH__liver	rs199950633,rs776112585	chr12	6485519	GATTTATTT	NA	0.21235	0.0265	0.009867	0.007238	35559
Ferkingstad	3848_14_GAPDH_GAPDH__liver	rs370833276	chr12	6485519	G	NA	0.23389	0.0436	0.009655	6.313e-06	35559
Ferkingstad	3852_19_DNAJB1_HSP_40	rs11085896	chr19	14541074	C	A	0.58453	-0.0523	0.008207	1.857e-10	35559
Ferkingstad	3853_56_MDH1_MDHC	rs35247066,rs72174827	chr2	63448440	ACACACACACACACACACACACACA	NA	0.6901	-0.0758	0.008564	8.635e-19	35559
Ferkingstad	3853_56_MDH1_MDHC	rs200892737,rs774354905	chr2	63448440	ACACACACACACACACACACACACACA	NA	0.24215	0.0607	0.009276	5.991e-11	35559
Ferkingstad	3855_56_PRDX1_Peroxiredoxin_1	rs767246811	chr1	45514595	GATAAGAATACCCTT	NA	0.00423	-1.3779	0.060601	1.921e-114	35559
Ferkingstad	3858_5_ACP1_PPAC	rs79716074	chr2	277003	G	A	0.36482	1.0882	0.004401	1e-200	35559
Ferkingstad	3894_15_NAGK_NAGK	rs11680831	chr2	71065392	C	T	0.37553	-0.1712	0.008221	2.651e-96	35559
Ferkingstad	4125_52_AGER_sRAGE	rs2070600	chr6	32183666	T	C	0.04306	-0.744	0.02023	1e-200	35559
Ferkingstad	4133_54_GZMB_Granzyme_B	rs78564162	chr14	24689939	G	A	0.06551	0.1596	0.016026	2.307e-23	35559
Ferkingstad	4141_79_CXCL10_IP_10	rs11548618	chr4	76022794	A	G	0.00286	1.907	0.077032	2.673e-135	35559
Ferkingstad	4145_58_NTF3_Neurotrophin_3	rs148590960	chr12	5432002	CGGA	NA	0.1191	-0.1334	0.012321	2.559e-27	35559
Ferkingstad	4154_57_SELP_P_Selectin	rs6136	chr1	169594713	G	T	0.12391	-0.3964	0.012308	1e-200	35559
Ferkingstad	4187_49_PGD_6_Phosphogluconate_dehydrogenase	rs113949329,rs57033638	chr1	10405390	CAAACAAAAAATACACACACACACACACACACACACACACACACACACACAC	NA	0.00097	-0.1238	0.128088	0.333782	35559
Ferkingstad	4187_49_PGD_6_Phosphogluconate_dehydrogenase	rs113949329	chr1	10405390	CAAACAAAAAATACACACACACACACACACACACACACACACACACACAC	NA	0.01817	-0.0006	0.031715	0.984906	35559
Ferkingstad	4187_49_PGD_6_Phosphogluconate_dehydrogenase	rs777744497	chr1	10405390	CAAACAAATACACACACACACACACACACACAC	NA	0.00099	0.2393	0.124866	0.055308	35559
Ferkingstad	4188_1_AKR7A2_Aflatoxin_B1_aldehyde_reductase	rs61766662	chr1	19330519	C	T	0.3241	-0.1514	0.008658	1.808e-68	35559
Ferkingstad	4192_10_AKR1A1_AK1A1	rs2229540	chr1	45566639	G	A	0.06458	-0.9199	0.012891	1e-200	35559
Ferkingstad	4209_60_VTA1_DRG_1	rs225656	chr6	142166332	A	C	0.47379	-0.0496	0.008051	7.224e-10	35559
Ferkingstad	4220_39_FER_FER	rs13178668	chr5	108771079	G	A	0.38211	0.0762	0.008416	1.374e-19	35559
Ferkingstad	4232_19_IGF1R_IGF_I_sR	rs186895929	chr15	98924701	AAGAAGAAACGTGGT	NA	0.00183	0.0613	0.088749	0.489746	35559
Ferkingstad	4232_19_IGF1R_IGF_I_sR	rs3841650	chr15	98924701	GAGAAGAAACGTG	NA	0.09093	0.2308	0.014531	8.312e-57	35559
Ferkingstad	4232_19_IGF1R_IGF_I_sR	rs1464430	chr15	98924701	GAGACGAAACGTGGT	NA	0.28898	-0.0315	0.009175	0.0005968	35559
Ferkingstad	4234_8_IL1RL1_IL_1_R4	rs11676124	chr2	102324878	C	T	0.65359	-0.7225	0.005302	1e-200	35559
Ferkingstad	4249_64_NME2_NDP_kinase_B	rs145372333	chr17	51149056	A	G	0.03901	-0.3524	0.020978	2.508e-63	35559
Ferkingstad	4254_6_NUDCD3_NUDC3	rs776014477	chr7	44386030	A	G	0.00126	-0.9657	0.107426	2.485e-19	35559
Ferkingstad	4297_62_SPON1_Spondin_1	rs1969539	chr11	14017074	G	A	0.54799	-0.2805	0.008243	1e-200	35559
Ferkingstad	4314_12_DCTPP1_XTP3A	rs11640950	chr16	30414680	A	T	0.23566	-0.0598	0.009697	6.975e-10	35559
Ferkingstad	4328_2_BOC_BOC	rs4682481	chr3	113265008	T	C	0.16318	0.2676	0.011109	3.253e-128	35559
Ferkingstad	4332_6_CLEC1B_CLC1B	rs11379994	chr12	9999157	TCCAACTC	NA	0.77516	-0.1728	0.009739	1.973e-70	35559
Ferkingstad	4337_49_CRP_CRP	rs3091244	chr1	159714875	A	NA	0.3267	0.1282	0.008773	2.337e-48	35559
Ferkingstad	4413_3_SLPI_SLPI	rs879344452	chr20	45283025	CTCTCCCACACACACACACACACACACACACACAACACAAACACACACCAAAACACAAACACACACC	NA	0.00191	-0.0973	0.09187	0.289551	35559
Ferkingstad	4413_3_SLPI_SLPI	rs56188833	chr20	45283025	CTCTCCCACACACACACACACACACACACACACACACAACACAAACACACACCAAAACACAAACACACACC	NA	0.07131	-0.01	0.015807	0.526984	35559
Ferkingstad	4413_3_SLPI_SLPI	rs1435103883	chr20	45283025	CTCTCCCTCACACACACACACACACACACACACAACACAAACACACACC	NA	0.02442	0.075	0.026802	0.005138	35559
Ferkingstad	4413_3_SLPI_SLPI	rs71181817	chr20	45283025	CTCTCCCTCACACACACACACACACACACACACACACACACAACACAAACACACACCAAAACACAAACACACACC	NA	0.05438	0.0642	0.018189	0.0004161	35559
Ferkingstad	4435_66_ENPP7_ENPP7	rs11868696	chr17	79732608	A	G	0.60347	-0.9136	0.00538	1e-200	35559
Ferkingstad	4437_56_ENTPD5_ENTP5	rs113768127	chr14	74001136	C	T	0.05469	-0.9106	0.013913	1e-200	35559
Ferkingstad	4455_89_MFGE8_MFGM	rs34239095	chr15	88912537	G	C	0.28203	0.2578	0.00904	6.758e-179	35559
Ferkingstad	4459_68_PCSK7_PCSK7	rs236910	chr11	117211258	G	A	0.27683	-0.8152	0.005963	1e-200	35559
Ferkingstad	4467_49_SPARCL1_SPARCL1	rs7681694	chr4	87541577	A	G	0.39019	0.5456	0.005916	1e-200	35559
Ferkingstad	4468_21_SPHK2_SPHK2	rs767563542	chr19	48613500	CGG	NA	0.01322	0.0185	0.036316	0.610463	35559
Ferkingstad	4468_21_SPHK2_SPHK2	rs443527	chr19	48613500	CGGG	NA	0.24352	0.0728	0.00942	1.09e-14	35559
Ferkingstad	4469_78_CHST15_ST4S6	rs6588740	chr10	124095824	T	C	0.72631	0.0987	0.009134	3.249e-27	35559
Ferkingstad	4471_50_TGM3_TGM3	rs214830	chr20	2340459	C	G	0.69275	0.3604	0.007466	1e-200	35559
Ferkingstad	4496_60_MMP12_MMP_12	rs28381684	chr11	102866461	T	A	0.10544	-0.7121	0.010613	1e-200	35559
Ferkingstad	4498_62_NCAM1_NCAM_120	rs2288158	chr11	113262954	G	T	0.13012	0.327	0.012566	2.689e-149	35559
Ferkingstad	4499_21_PDGFA_PDGF_AA	rs1204243698	chr7	592442	G	NA	0.01201	-0.3636	0.039443	3.018e-20	35559
Ferkingstad	4533_76_ADAMTS15_ATS15	rs116897071	chr11	130462562	C	T	0.00989	0.3207	0.040202	1.497e-15	35559
Ferkingstad	4534_10_PRSS22_BSSP4	rs7204669	chr16	2860735	A	G	0.29505	0.2393	0.009026	7.119e-155	35559
Ferkingstad	4535_50_BST1_BST1	rs73224659	chr4	15712566	A	C	0.15371	-1.3987	0.005516	1e-200	35559
Ferkingstad	4541_49_CDON_CDON	rs3740910	chr11	126019778	G	A	0.07705	-0.6651	0.012381	1e-200	35559
Ferkingstad	4546_27_ADGRE2_EMR2	rs67023356	chr19	14396821	G	A	0.26435	0.364	0.00776	1e-200	35559
Ferkingstad	4559_64_KYNU_KYNU	rs12477146	chr2	143036245	A	G	0.2079	-0.4654	0.008154	1e-200	35559
Ferkingstad	4563_61_PLCG1_PLCG1	rs753381	chr20	41168825	C	T	0.52685	0.0669	0.007994	5.799e-17	35559
Ferkingstad	4564_2_PLXNC1_PLXC1	rs115651556	chr12	94220122	A	G	0.01483	-2.0436	0.02548	1e-200	35559
Ferkingstad	4567_82_SH2D1A_SH21A	rs12164382	chrX	124346297	T	C	0.45296	0.1036	0.007235	1.659e-46	35559
Ferkingstad	4568_17_SLITRK5_SLIK5	rs12877225	chr13	87995130	A	G	0.25626	-0.1355	0.009365	1.927e-47	35559
Ferkingstad	4706_17_EPB41_41	rs204074	chr1	28865051	C	T	0.11346	-0.098	0.012543	5.566e-15	35559
Ferkingstad	4771_10_SMPDL3A_ASM3A	rs28385609	chr6	122801319	T	C	0.17027	-0.3023	0.010746	4.14e-174	35559
Ferkingstad	4831_4_SELL_sL_Selectin	rs201860477,rs60301674	chr1	169692243	TAATAATTTAT	NA	0.05867	0.1657	0.017649	6.077e-21	35559
Ferkingstad	4831_4_SELL_sL_Selectin	rs148956203	chr1	169692243	TAATTTAATTTAATTTAATTTAATTTAT	NA	0.05036	-0.0505	0.019686	0.010308	35559
Ferkingstad	4834_61_EPHA2_Epithelial_cell_kinase	rs779038614	chr1	16148450	T	C	0.00288	2.5344	0.079199	1e-200	35559
Ferkingstad	4842_62_GPC3_Glypican_3	rs3058487	chrX	134090928	TTGTGTGTGTGTGTGTGTGTGT	NA	0.16445	0.0854	0.009933	8.138e-18	35559
Ferkingstad	4866_59_NTRK2_TrkB	rs546163040	chr9	84773405	G	A	0.0014	-1.0825	0.108062	1.278e-23	35559
Ferkingstad	4874_3_ANG_Angiogenin	rs28535078	chr14	20676917	A	G	0.22107	0.5563	0.007423	1e-200	35559
Ferkingstad	4876_32_F9_Coagulation_Factor_IX	rs772966694	chrX	139562870	T	A	0.00811	-0.362	0.043999	1.912e-16	35559
Ferkingstad	4908_6_ENG_Endoglin	rs117980424	chr9	127791943	T	C	0.00378	2.0632	0.069609	4.589e-193	35559
Ferkingstad	4909_68_LGALS8_Galectin_8	rs370852798	chr1	236543605	T	C	0.00309	-0.53	0.068833	1.363e-14	35559
Ferkingstad	4911_49_GSTP1_Glutathione_S_transferase_Pi	rs1254123	chr11	67567341	C	T	0.46937	-0.1262	0.007962	1.398e-56	35559
Ferkingstad	4920_10_LYZ_Lysozyme	rs4761234	chr12	69338325	C	T	0.48598	-0.4897	0.006332	1e-200	35559
Ferkingstad	4924_32_MMP1_MMP_1	rs534191	chr11	102800966	T	C	0.44854	0.4334	0.005944	1e-200	35559
Ferkingstad	4925_54_MMP13_MMP_13	rs142601143	chr11	102949141	C	T	0.00116	2.0521	0.121704	8.651e-64	35559
Ferkingstad	4929_55_SHBG_SHBG	rs858519	chr17	7628647	C	T	0.52997	0.1691	0.008188	9.519e-95	35559
Ferkingstad	4930_21_STC1_Stanniocalcin_1	rs776446817	chr8	23834609	CATATATGTATATATATATATATATATATATATATATATATATAT	NA	0.01176	-0.027	0.036743	0.462441	35559
Ferkingstad	4930_21_STC1_Stanniocalcin_1	rs117641395	chr8	23834609	TATATATATATATATATATATAC	NA	0.08446	-0.0324	0.014596	0.026434	35559
Ferkingstad	4930_21_STC1_Stanniocalcin_1	rs1238867623	chr8	23834609	TATATATATATATATATATATATAC	NA	0.00199	0.3299	0.092343	0.0003535	35559
Ferkingstad	4930_21_STC1_Stanniocalcin_1	rs10573085,rs34767073	chr8	23834609	TATATATATATATATATAT	NA	0.30791	-0.0103	0.008918	0.248115	35559
Ferkingstad	4960_72_ANXA1_annexin_I	rs7357731	chr9	73175019	A	G	0.974	-0.3368	0.025326	2.361e-40	35559
Ferkingstad	4964_67_ERAP1_ARTS1	rs469367	chr5	96787352	G	A	0.79036	-1.1332	0.00458	1e-200	35559
Ferkingstad	4968_50_CAPG_CAPG	rs62623452	chr2	85402143	T	C	0.01704	-1.2126	0.025151	1e-200	35559
Ferkingstad	4969_2_CA1_Carbonic_anhydrase_I	rs117634905	chr8	85629747	G	A	0.00789	-1.0942	0.045695	1.019e-126	35559
Ferkingstad	4971_1_CTSZ_CATZ	rs199825459	chr20	58997654	G	A	0.01776	-1.722	0.023647	1e-200	35559
Ferkingstad	4978_54_DBNL_DBNL	rs56665454	chr7	44037871	T	C	0.35519	0.0716	0.008425	1.915e-17	35559
Ferkingstad	4979_34_DPT_DERM	rs1018454	chr1	168728523	C	A	0.55146	0.341	0.006615	1e-200	35559
Ferkingstad	4982_54_PI3_Elafin	rs17332620	chr20	45148865	T	C	0.20122	0.3382	0.010174	1e-200	35559
Ferkingstad	4984_83_ESD_Esterase_D	rs2298087	chr13	46777268	C	T	0.08957	-0.3585	0.013851	1.032e-147	35559
Ferkingstad	4991_12_GPC5_GPC5	rs342706	chr13	91764804	C	T	0.25489	-0.5466	0.007177	1e-200	35559
Ferkingstad	5000_52_LGALS3BP_LG3BP	rs3826311	chr17	78975444	C	T	0.20273	0.1991	0.010442	4.791e-81	35559
Ferkingstad	5005_4_MAPK12_MK12	rs3817818	chr22	50260902	G	C	0.57255	-0.2159	0.008187	3.015e-153	35559
Ferkingstad	5006_71_MAPK13_MK13	rs10447396	chr6	36145821	A	G	0.24445	0.1156	0.009245	7.041e-36	35559
Ferkingstad	5012_67_AK1_Myokinase__human	rs9919018	chr9	127880476	A	G	0.24427	-0.0601	0.009451	2.027e-10	35559
Ferkingstad	5015_15_PLA2G7_PAFAH	rs144983904	chr6	46716515	T	C	0.00352	-1.9177	0.074278	5.58e-147	35559
Ferkingstad	5018_68_PRDX6_Peroxiredoxin_6	rs142289742	chr1	173468074	T	TA	0.14748	0.1228	0.011447	7.51e-27	35559
Ferkingstad	5028_59_CD163_sCD163	rs11054546	chr12	7574463	A	NA	0.00568	-0.1208	0.055619	0.029861	35559
Ferkingstad	5029_3_FAP_SEPR	rs1476165463	chr2	162248642	CA	NA	0.01595	0.7816	0.033484	1.636e-120	35559
Ferkingstad	5034_79_PRSS2_Trypsin_2	rs1799886	chr7	142800839	C	T	0.41013	0.2038	0.008582	1.192e-124	35559
Ferkingstad	5036_50_TNFAIP6_TSG_6	rs2278089	chr2	151290158	T	G	0.57105	-0.5175	0.005873	1e-200	35559
Ferkingstad	5060_62_CD274_B7_H1	rs1411262	chr9	5459419	T	C	0.25993	-0.2424	0.00887	1.907e-164	35559
Ferkingstad	5061_27_ICOSLG_B7_H2	rs56124762	chr21	44238591	G	A	0.25396	-0.0798	0.009203	4.284e-18	35559
Ferkingstad	5063_12_CD244_CD244	rs115868021	chr1	160841584	G	C	0.01603	-0.3661	0.031593	4.738e-31	35559
Ferkingstad	5066_134_CD300C_CLM6	rs72844326	chr17	74462952	G	T	0.04222	-0.6071	0.020092	1.447e-200	35559
Ferkingstad	5069_9_CD55_DAF	rs61822669	chr1	207247869	A	G	0.2592	-0.4136	0.007351	1e-200	35559
Ferkingstad	5076_53_EPHA10_EPHAA	rs12074120	chr1	37731729	G	T	0.27252	0.078	0.008841	1.122e-18	35559
Ferkingstad	5078_82_EPHB6_EphB6	rs1349048103,rs200971425,rs386718772,rs550707591,rs7789303	chr7	142854781	CAGGA	NA	0.70411	0.2471	0.008973	6.057e-167	35559
Ferkingstad	5085_18_IL20RA_IL_20_Ra	rs1167852	chr6	137017711	T	A	0.73622	-0.0622	0.009041	5.994e-12	35559
Ferkingstad	5087_5_IL22RA2_IL_22BP	rs765343687	chr6	137051869	C	CCAAA	0.00349	-1.3161	0.071239	3.322e-76	35559
Ferkingstad	5089_11_IL7R_IL_7_Ra	rs36085985	chr5	35880754	GTTTGTTTGTTTGTTTGTTTGT	NA	0.0576	0.0195	0.016863	0.247528	35559
Ferkingstad	5089_11_IL7R_IL_7_Ra	rs149842758	chr5	35880754	TTGTTTGTTTGTTTGTTTGTTTGT	NA	0.0004	0.0983	0.196488	0.616874	35559
Ferkingstad	5089_11_IL7R_IL_7_Ra	rs57428547	chr5	35880754	TTTTGTTTGTTTGTTTGTTTGT	NA	0.05583	0.0672	0.017404	0.0001128	35559
Ferkingstad	5089_11_IL7R_IL_7_Ra	rs10058572	chr5	35880754	TTTTTGTTTGTTTGTTTGTTTGT	NA	0.65347	-0.0794	0.008314	1.293e-21	35559
Ferkingstad	5090_49_LILRB1_ILT_2	rs138131257	chr19	54572135	G	A	0.06592	-1.6081	0.009854	1e-200	35559
Ferkingstad	5091_28_LILRB2_ILT_4	rs383925	chr19	54279666	C	T	0.80525	1.0315	0.007207	1e-200	35559
Ferkingstad	5092_51_JAG1_JAG1	rs927357990	chr20	10530242	A	C	0.00053	2.5637	0.213904	4.243e-33	35559
Ferkingstad	5095_21_KIR2DL4_KI2L4	rs685323	chr19	54795911	C	A	0.37077	-0.2677	0.008425	1e-200	35559
Ferkingstad	5097_14_KIR3DS1_KI3S1	rs62124099	chr19	54819067	G	A	0.17588	0.0808	0.010464	1.146e-14	35559
Ferkingstad	5103_30_CD200R1_MO2R1	rs62263730	chr3	112859161	A	G	0.3474	0.1152	0.008424	1.429e-42	35559
Ferkingstad	5105_2_RTN4R_Nogo_Receptor	rs75765	chr22	20187436	T	C	0.73006	-0.2929	0.009608	1e-200	35559
Ferkingstad	5107_7_NOTCH1_Notch_1	rs749880322	chr9	136394249	G	T	0.00029	2.3562	0.222666	3.621e-26	35559
Ferkingstad	5108_72_NOTCH3_Notch_3	rs775743128	chr19	15215012	A	G	0.0007	-2.0901	0.155893	5.483e-41	35559
Ferkingstad	5109_24_NRCAM_Nr_CAM	rs1034826	chr7	108443160	C	T	0.22809	-0.0679	0.009752	3.345e-12	35559
Ferkingstad	5112_73_CD200_OX2G	rs7619941	chr3	112337567	G	A	0.9323	0.128	0.015789	5.183e-16	35559
Ferkingstad	5128_53_SLAMF6_SLAF6	rs12137007	chr1	160493616	G	A	0.17654	-0.2124	0.010478	2.341e-91	35559
Ferkingstad	5129_12_SCARF1_SREC_I	rs2272011	chr17	1638896	A	G	0.54729	-0.3946	0.006847	1e-200	35559
Ferkingstad	5131_15_TNFRSF19_TAJ	rs11367807	chr13	23592986	GTTTTTTTTT	NA	0.18903	-0.049	0.010235	1.69e-06	35559
Ferkingstad	5131_15_TNFRSF19_TAJ	rs5802243,rs780221619	chr13	23592986	GTTTTTTTTTTT	NA	0.2877	0.1056	0.008762	1.896e-33	35559
Ferkingstad	5132_71_IL27RA_TCCR	rs35026308	chr19	14042481	C	T	0.16882	-1.0213	0.008049	1e-200	35559
Ferkingstad	5134_52_HAVCR2_TIMD3	rs6873659	chr5	157102841	G	A	0.83263	-0.6497	0.008145	1e-200	35559
Ferkingstad	5202_4_PPID_PPID	rs17843929	chr4	158715961	T	C	0.2608	0.2657	0.009163	7.002e-185	35559
Ferkingstad	5227_60_PDK1_PDK1	rs141274555	chr2	172537700	CGGCTGCCATCCCATCTGGGAAGTGAGGAGCGCCTCTTCCTGGCCACCATCCCATCTGGGAAGTGAGGAGCG	NA	0.11721	-0.2152	0.01229	1.184e-68	35559
Ferkingstad	5227_60_PDK1_PDK1	rs1372954877	chr2	172537700	CGGCTGCCATCCCATCTGGGAAGTGAGGAGCGCCTCTTCCTGGCCGCCATCCCATCTGGGAAGTGAGGAGCA	NA	0.00014	-0.7676	0.567575	0.176241	35559
Ferkingstad	5227_60_PDK1_PDK1	rs879305933	chr2	172537700	CGGCTGCCATCCCATCTGGGAAGTGAGGAGCG	NA	0.04828	-0.1999	0.018564	4.857e-27	35559
Ferkingstad	5238_26_PPIE_PPIE	rs7520588	chr1	39748853	A	T	0.42629	-0.2873	0.008201	1e-200	35559
Ferkingstad	5275_28_VAV1_VAV	rs36097961	chr19	6850756	T	C	0.09873	-0.1123	0.013589	1.405e-16	35559
Ferkingstad	5301_7_CCL11_Eotaxin	rs1989357	chr17	34227435	T	A	0.39124	-0.1157	0.008288	2.707e-44	35559
Ferkingstad	5337_64_CD86_B7_2	rs560975501	chr3	122108695	G	A	0.00349	0.5792	0.066525	3.133e-18	35559
Ferkingstad	5346_24_CPNE1_CPNE1	rs143646210	chr20	35612055	A	G	0.09569	-1.0782	0.010195	1e-200	35559
Ferkingstad	5349_69_DLL1_DLL1	rs9356631	chr6	170278382	G	A	0.41702	0.0983	0.008374	8.024e-32	35559
Ferkingstad	5355_69_TNFSF14_LIGHT	rs413141	chr19	6675978	G	A	0.85806	-0.1741	0.011604	6.928e-51	35559
Ferkingstad	5357_60_NLGN4X_NLGNX	rs12013076	chrX	6002689	C	G	0.21464	0.0579	0.0086	1.666e-11	35559
Ferkingstad	5358_3_OMD_OMD	rs398011471,rs59779881,rs751927479	chr9	92348115	TT	NA	0.42626	0.0649	0.008435	1.426e-14	35559
Ferkingstad	5363_51_SEMA3E_Semaphorin_3E	rs61729612	chr7	83408415	G	C	0.14658	-1.0552	0.006597	1e-200	35559
Ferkingstad	5400_52_LEPR_sLeptin_R	rs61781309	chr1	65617112	A	G	0.16956	-1.3941	0.005234	1e-200	35559
Ferkingstad	5404_53_TNFRSF21_DR6	rs6458555	chr6	47309833	A	G	0.35173	0.1141	0.008595	3.231e-40	35559
Ferkingstad	5430_66_SIRPA_SHPS1	rs6136377	chr20	1915642	G	A	0.35955	-1.2634	0.004361	1e-200	35559
Ferkingstad	5443_62_NPPA_ANP	rs145488887	chr1	11767739	C	T	0.04607	0.1306	0.018844	4.186e-12	35559
Ferkingstad	5451_1_ALCAM_ALCAM	rs77228368	chr3	105513153	G	C	0.03607	0.3005	0.022678	4.454e-40	35559
Ferkingstad	5452_71_ASGR1_ASGR1	rs1325424663	chr17	7167716	AA	NA	0.49681	0.092	0.008386	5.325e-28	35559
Ferkingstad	5456_59_CNDP1_CNDP1	rs17817077	chr18	74542308	A	G	0.38947	0.2854	0.008612	1e-200	35559
Ferkingstad	5457_5_COLEC12_COLEC12	rs145828426	chr18	334837	A	G	0.00304	2.0067	0.071928	2.755e-171	35559
Ferkingstad	5463_22_GAS1_GAS1	rs4878043	chr9	87072939	T	C	0.57732	0.0843	0.008368	7.196e-24	35559
Ferkingstad	5465_32_HS6ST1_H6ST1	rs840870	chr2	128308686	T	G	0.56827	-0.1533	0.008176	1.935e-78	35559
Ferkingstad	5475_10_PRKCB_PKC_B_II	rs34911734,rs565160427	chr16	23876582	GAA	NA	0.61627	-0.0673	0.008328	6.415e-16	35559
Ferkingstad	5475_10_PRKCB_PKC_B_II	rs559113194	chr16	23876582	G	NA	0.06821	-0.0131	0.015887	0.409601	35559
Ferkingstad	5478_50_FOLH1_PSMA	rs56223026	chr11	49215709	CAAAAAAAAAAAAAAG	NA	0.03582	0.3708	0.02214	5.882e-63	35559
Ferkingstad	5478_50_FOLH1_PSMA	rs553068274	chr11	49215709	CAAAAAAAAAAAAA	NA	0.27705	-0.0249	0.009328	0.007596	35559
Ferkingstad	5487_7_SLAMF7_SLAF7	rs11581248	chr1	160750284	T	C	0.12707	-1.2752	0.007129	1e-200	35559
Ferkingstad	5491_12_SPOCK2_Testican_2	rs1245548	chr10	72086126	A	G	0.45859	0.1888	0.008221	1.014e-116	35559
Ferkingstad	5509_7_EGF_EGF	rs115396821	chr4	109969118	A	G	0.01227	-0.5293	0.036755	5.119e-47	35559
Ferkingstad	5542_22_NRP1_NRP1	rs2506150	chr10	33194380	A	G	0.33107	-0.301	0.008641	1e-200	35559
Ferkingstad	5581_28_FGL1_FGL1	rs2073562	chr8	17885420	G	A	0.68464	0.5253	0.006528	1e-200	35559
Ferkingstad	5586_66_MINPP1_MINP1	rs59980852	chr10	87515989	T	C	0.43946	-0.0948	0.008201	6.602e-31	35559
Ferkingstad	5598_3_GREM2_GREM2	rs764807134	chr1	240432331	G	A	0.00049	-1.4364	0.17777	6.471e-16	35559
Ferkingstad	5601_2_PGLYRP2_PGRP_L	rs140755383	chr19	15474182	A	C	0.16408	-0.3539	0.010993	1e-200	35559
Ferkingstad	5604_30_HPSE_HPSE	rs11732892	chr4	83309860	AAAATTTTTTTTA	NA	0.77759	0.133	0.009597	1.128e-43	35559
Ferkingstad	5605_77_MFNG_MFNG	rs530065571	chr22	37475672	ACTCCCCTCCCCAGCCTG	NA	0.00096	-0.1515	0.130899	0.247115	35559
Ferkingstad	5605_77_MFNG_MFNG	rs116906616	chr22	37475672	ACTCCCGTCCCCAGCCTGCACTCCCCTCCCCAGCCTG	NA	0.01961	-0.6069	0.027912	8.009e-105	35559
Ferkingstad	5609_92_FAM19A5_F19A5	rs772611234	chr22	48646728	T	C	0.00215	-0.5891	0.087436	1.611e-11	35559
Ferkingstad	5610_32_FAM171A1_CJ038	rs138799489	chr10	15254801	T	G	0.00506	0.6371	0.055645	2.366e-30	35559
Ferkingstad	5615_62_FAM172A_F172A	rs13165400	chr5	93755721	A	G	0.09572	0.0968	0.013653	1.343e-12	35559
Ferkingstad	5620_13_PAM_AMD	rs41300805	chr5	103025380	C	G	0.15727	0.7017	0.007534	1e-200	35559
Ferkingstad	5621_64_THSD1_THSD1	rs41292808	chr13	52397382	T	C	0.02959	1.4692	0.019061	1e-200	35559
Ferkingstad	5628_21_SEMA3G_SEM3G	rs13091025	chr3	52433308	C	A	0.11366	-0.2814	0.01294	7.4e-105	35559
Ferkingstad	5630_48_CD300A_CM35H	rs2272111	chr17	74473827	A	G	0.19797	-0.6849	0.007456	1e-200	35559
Ferkingstad	5631_83_MLN_MOTI	rs11275240,rs147391762	chr6	33809033	AATAGCATCCCTGCGGCTGAGTTTTACA	NA	0.57067	-0.4452	0.005734	1e-200	35559
Ferkingstad	5632_6_CRTAC1_CRAC1	rs684225	chr10	97882605	A	C	0.48516	-0.3464	0.006306	1e-200	35559
Ferkingstad	5634_39_POFUT1_OFUT1	rs35968884	chr20	32231020	A	G	0.00402	2.4541	0.05357	1e-200	35559
Ferkingstad	5636_10_MFAP4_MFAP4	rs139356332	chr17	19385973	C	G	0.02455	-0.6543	0.02692	1.721e-130	35559
Ferkingstad	5637_81_NTNG1_NTNG1	rs115668827	chr1	107135646	C	G	0.06717	1.3226	0.011984	1e-200	35559
Ferkingstad	5638_23_COLGALT1_GT251	rs553507948	chr19	17581396	A	NA	0.00083	-0.2382	0.129061	0.064945	35559
Ferkingstad	5638_23_COLGALT1_GT251	rs748616335	chr19	17581396	TCG	NA	0.00086	2.9108	0.150693	3.931e-83	35559
Ferkingstad	5644_60_RNASE4_RNAS4	rs143247343	chr14	20699483	T	C	0.00546	-2.1024	0.04505	1e-200	35559
Ferkingstad	5646_20_RNASE6_RNAS6	rs60393995,rs796410349	chr14	20780101	C	NA	0.25266	1.0068	0.006314	1e-200	35559
Ferkingstad	5646_20_RNASE6_RNAS6	rs80151191	chr14	20780101	TA	NA	0.15361	-0.2259	0.012367	1.538e-74	35559
Ferkingstad	5648_28_CTRB2_CTRB2	rs8048956	chr16	75221068	C	G	0.8028	-0.8591	0.006361	1e-200	35559
Ferkingstad	5649_83_PSG4_PSG4	rs62116515	chr19	43205663	C	T	0.61642	-0.655	0.005954	1e-200	35559
Ferkingstad	5651_50_PSG7_PSG7	rs1209671921	chr19	42935542	A	G	0.85201	-0.1587	0.010877	3.245e-48	35559
Ferkingstad	5656_53_ENDOU_PP11	rs10875688	chr12	47740575	AGT	NA	0.29219	0.0662	0.008669	2.229e-14	35559
Ferkingstad	5656_53_ENDOU_PP11	rs539125821	chr12	47740575	G	NA	0.00341	0.0639	0.071249	0.369794	35559
Ferkingstad	5680_54_OBP2B_OBP2B	rs3761822	chr9	133210436	A	G	0.80032	0.3741	0.01115	1e-200	35559
Ferkingstad	5682_13_VASN_VASN	rs746313383	chr16	4382567	A	G	0.0005	-1.8487	0.188794	1.217e-22	35559
Ferkingstad	5687_5_PRKCSH_GLU2B	rs11557488	chr19	11447460	A	G	0.2142	0.1132	0.009695	1.682e-31	35559
Ferkingstad	5688_65_CBLN4_CBLN4	rs7351418	chr20	55721241	T	C	0.34464	0.1538	0.008695	5.192e-70	35559
Ferkingstad	5691_2_CRISPLD2_CRLD2	rs190984919	chr16	84865188	T	C	0.01126	-1.1136	0.041397	2.166e-159	35559
Ferkingstad	5701_81_CLEC3B_Tetranectin	rs35377303,rs397776260	chr3	45047341	TGCG	NA	0.36331	0.0804	0.008381	8.524e-22	35559
Ferkingstad	5701_81_CLEC3B_Tetranectin	rs10686147,rs35377303	chr3	45047341	TGTGCG	NA	0.24192	0.0882	0.009484	1.405e-20	35559
Ferkingstad	5701_81_CLEC3B_Tetranectin	rs35377303	chr3	45047341	TGTGTGCG	NA	0.07636	0.0853	0.015078	1.537e-08	35559
Ferkingstad	5704_74_GZMM_Granzyme_M	rs759359247	chr19	549562	GGCAGGCCCTGCTCCCCTCG	NA	0.00062	0.1307	0.206771	0.527322	35559
Ferkingstad	5704_74_GZMM_Granzyme_M	rs778685093	chr19	549562	G	NA	0.00913	0.4349	0.042542	1.566e-24	35559
Ferkingstad	5722_78_PRCP_Prolylcarboxypeptidase	rs2229437	chr11	82853252	G	T	0.16215	0.2154	0.011168	6.782e-83	35559
Ferkingstad	5727_35_B3GALTL_B3GLT	rs2025727	chr13	31311017	A	G	0.76703	0.2736	0.009285	7.593e-191	35559
Ferkingstad	5728_60_FCRL1_FCRL1	rs4971154	chr1	157802090	T	C	0.53543	-0.3789	0.006086	1e-200	35559
Ferkingstad	5731_1_SPINK6_ISK6	rs12186491	chr5	148213934	A	C	0.93668	0.9662	0.012814	1e-200	35559
Ferkingstad	5734_13_PVRL4_nectin_4	rs34990628	chr1	161097295	T	C	0.15898	-0.0784	0.01073	2.741e-13	35559
Ferkingstad	5735_54_C1GALT1C1_C1GLC	rs149340486	chrX	120626865	T	C	0.01259	-1.5817	0.025871	1e-200	35559
Ferkingstad	5737_61_SEMA4D_SEM4D	rs186851142	chr9	89376371	AA	NA	0.07755	-1.1862	0.010782	1e-200	35559
Ferkingstad	5740_17_ROBO1_ROBO1	rs3836363,rs397711245	chr3	78725375	T	TA	0.78701	-0.223	0.01012	1.343e-107	35559
Ferkingstad	5742_14_ACP6_PPA6	rs2153463	chr1	147652507	G	T	0.73621	0.9522	0.005684	1e-200	35559
Ferkingstad	5744_12_MENT_CA056	rs587603472	chr1	151048273	T	TAGTC	0.00356	-1.8719	0.072498	5.275e-147	35559
Ferkingstad	5749_53_CLPS_COL	rs10653763,rs33923874,rs66703038	chr6	35797677	TTA	T	0.56765	0.3991	0.006743	1e-200	35559
Ferkingstad	5763_67_DEFB104A_HBD_4	rs2740124	chr8	7830407	C	G	0.5443	-0.2153	0.008127	1.253e-154	35559
Ferkingstad	5798_3_BID_BID	rs183393610	chr22	17769676	A	G	0.00982	-0.4688	0.041064	3.468e-30	35559
Ferkingstad	5810_25_TDGF1_Cripto	rs80045772	chr3	46577748	A	T	0.27107	1.3155	0.003952	1e-200	35559
Ferkingstad	5813_58_EPO_Epo	rs221790	chr7	100680659	C	G	0.58961	0.0691	0.008295	8.034e-17	35559
Ferkingstad	5825_49_IFNGR1_IFN_g_R1	rs377227464	chr6	137206273	C	T	0.00385	-0.6412	0.067387	1.814e-21	35559
Ferkingstad	5834_18_IL9_IL_9	rs34989279,rs397699744	chr5	136182233	GAAA	NA	0.28457	0.0867	0.00881	7.491e-23	35559
Ferkingstad	5837_49_LIFR_LIF_sR	rs74856317	chr5	38485869	C	T	0.00629	1.1954	0.051163	9.854e-121	35559
Ferkingstad	5864_10_ALDOA_aldolase_A	rs752587498	chr16	30067543	A	G	0.00115	-1.0563	0.134556	4.152e-15	35559
Ferkingstad	5867_60_ARG1_ARGI1	rs2781668	chr6	131576138	T	C	0.1932	-0.1115	0.009949	3.744e-29	35559
Ferkingstad	5900_11_HINT1_HINT1	rs1234378068,rs550611466	chr5	131107478	TAAAAAAAAA	NA	0.0009	-0.1652	0.128212	0.197574	35559
Ferkingstad	5900_11_HINT1_HINT1	rs10597544,rs878983395	chr5	131107478	TAAAAAAAA	NA	0.22038	0.0968	0.009644	1.045e-23	35559
Ferkingstad	5918_5_PSME1_PSME1	rs3742500	chr14	24142769	T	G	0.25046	0.0592	0.009225	1.386e-10	35559
Ferkingstad	5939_42_TNFSF12_TWEAK	rs80067372	chr17	7549435	A	G	0.30552	0.3664	0.007301	1e-200	35559
Ferkingstad	5947_90_THPO_Tpo	rs372687062	chr3	183389654	CT	NA	0.00282	-0.5003	0.076736	7.043e-11	35559
Ferkingstad	5963_9_DMKN_Dermokine	rs796417527	chr19	35519170	AAA	NA	0.09581	0.0017	0.014389	0.90595	35559
Ferkingstad	5963_9_DMKN_Dermokine	rs537677041	chr19	35519170	AAAAAAAAC	NA	0.02886	-0.0296	0.02461	0.22907	35559
Ferkingstad	5963_9_DMKN_Dermokine	rs532803327	chr19	35519170	AA	NA	0.2664	0.0577	0.009351	6.802e-10	35559
Ferkingstad	5963_9_DMKN_Dermokine	rs1477173291,rs761429939	chr19	35519170	AAAC	NA	0.12093	-0.0576	0.012649	5.275e-06	35559
Ferkingstad	5963_9_DMKN_Dermokine	rs750238557	chr19	35519170	C	NA	0.22621	-0.03	0.0098	0.002205	35559
Ferkingstad	6039_24_CRHBP_CRHBP	rs143920110,rs36029083,rs763002628,rs796153282	chr5	76912882	CAG	NA	0.72357	-0.5428	0.007088	1e-200	35559
Ferkingstad	6049_64_PTPRS_PTPRS	rs55763631	chr19	5293572	A	C	0.06933	0.1985	0.016553	3.936e-33	35559
Ferkingstad	6060_2_PIP_PIP	rs73170678	chr7	143139110	T	A	0.13752	0.5985	0.009054	1e-200	35559
Ferkingstad	6227_1_KLK10_kallikrein_10	rs2569454	chr19	51019947	C	T	0.58305	0.6107	0.006584	1e-200	35559
Ferkingstad	6234_74_VIT_VITRN	rs1468810	chr2	36766797	A	C	0.59522	-0.3593	0.006727	1e-200	35559
Ferkingstad	6247_9_SIRPB1_SIRB1	rs12480515	chr20	1558519	T	C	0.25012	0.9156	0.00553	1e-200	35559
Ferkingstad	6252_62_SCGB3A1_Secretoglobin_family_3A_member_1	rs200868132	chr5	180590693	ATG	NA	0.00115	-2.4541	0.124728	3.493e-86	35559
Ferkingstad	6255_74_CPXM1_CPXM1	rs910832875	chr20	2800100	CTGTGAGTGCACTGTGTGTGCGCGCA	NA	0.00025	-0.1399	0.311551	0.6534	35559
Ferkingstad	6255_74_CPXM1_CPXM1	rs139033775	chr20	2800100	CTGTGAGTGTGAGTGTGCGCGCGCA	NA	0.01503	-0.2431	0.034817	2.905e-12	35559
Ferkingstad	6255_74_CPXM1_CPXM1	rs117029624	chr20	2800100	CTGTGAGTGTGAGTGTGCGCGCGTGTGCACTGTGTGTGCGCGCA	NA	0.00068	0.0183	0.195739	0.925513	35559
Ferkingstad	6255_74_CPXM1_CPXM1	rs67159741	chr20	2800100	CTGTGAGTGTGAGTGTG	NA	0.09628	-0.5014	0.014017	1e-200	35559
Ferkingstad	6342_10_NPNT_Nephronectin	rs34712979	chr4	105897896	A	G	0.24399	-0.1964	0.009233	2.055e-100	35559
Ferkingstad	6359_50_POMGNT2_AGO61	rs2936818	chr3	43081474	A	NA	0.4652	-0.3313	0.006474	1e-200	35559
Ferkingstad	6364_7_TAPBPL_TPSNR	rs2041388	chr12	6453670	A	G	0.26534	1.3258	0.003943	1e-200	35559
Ferkingstad	6366_38_TXNDC15_TXD15	rs3733897	chr5	134887903	G	A	0.12569	0.4729	0.009435	1e-200	35559
Ferkingstad	6367_66_FMOD_fibromodulin	rs149886220	chr1	203342399	T	C	0.00812	-0.8573	0.04517	2.534e-80	35559
Ferkingstad	6375_75_XXYLT1_XXLT1	rs12695049	chr3	195268211	T	C	0.53295	0.1953	0.00815	6.932e-127	35559
Ferkingstad	6379_62_ADAMTSL2_ATL2	rs11534419	chr9	133523101	T	C	0.39288	0.1118	0.008717	1.176e-37	35559
Ferkingstad	6382_17_MANBA_MANBA	rs223492	chr4	102753951	C	G	0.34019	0.4445	0.00661	1e-200	35559
Ferkingstad	6383_90_TLL1_TLL1	rs1903176	chr4	165742950	A	T	0.36206	-0.0586	0.008644	1.205e-11	35559
Ferkingstad	6385_63_VWA1_VWA1	rs115503338	chr1	1434243	A	G	0.02391	-1.2384	0.021993	1e-200	35559
Ferkingstad	6392_7_WISP2_WISP_2	rs2296530	chr20	44720094	ACGGGG	NA	0.32061	0.1193	0.00927	6.723e-38	35559
Ferkingstad	6404_20_C1QL1_C1QRF	rs10603237,rs60399635	chr17	44947090	CAGAG	NA	0.46841	-0.2023	0.008135	1.606e-136	35559
Ferkingstad	6408_2_INHBC_INHBC	rs746556156	chr12	57449732	G	NA	0.00149	-1.777	0.099635	3.774e-71	35559
Ferkingstad	6409_57_ADGRF5_GP116	rs397802490,rs58917843	chr6	46854900	GA	G	0.96698	1.4914	0.015163	1e-200	35559
Ferkingstad	6425_87_MMP19_MMP19	rs141023737	chr12	55837984	G	A	0.00205	-1.6124	0.082982	4.242e-84	35559
Ferkingstad	6434_18_AOC2_Amine_oxidase	rs34230945	chr17	42844639	G	A	0.03431	0.1693	0.021036	8.41e-16	35559
Ferkingstad	6444_15_PSG3_PSG3	rs2355433	chr19	43174936	C	NA	0.00244	-0.4106	0.08319	7.987e-07	35559
Ferkingstad	6448_36_SEMA3C_Sema_E	rs917191	chr7	80941555	C	G	0.58373	0.1075	0.008266	1.156e-38	35559
Ferkingstad	6455_52_HAPLN4_HPLN4	rs10403273	chr19	19262159	G	C	0.15273	0.1125	0.01092	6.872e-25	35559
Ferkingstad	6461_54_APOC3_Apo_C_III	rs192489212	chr11	117349713	C	A	0.00214	-2.2006	0.086228	1.165e-143	35559
Ferkingstad	6462_12_TIMP4_TIMP_4	rs184262	chr3	12093240	G	A	0.83929	0.4228	0.011237	1e-200	35559
Ferkingstad	6467_65_POGLUT1_KTEL1	rs10575462,rs374968294	chr3	119449165	G	GTTAATT	0.06567	0.3989	0.0161	1.632e-135	35559
Ferkingstad	6470_19_FBLN1_fibulin_1	rs136730	chr22	45527947	G	A	0.99673	1.2637	0.070679	1.706e-71	35559
Ferkingstad	6471_53_CFHR4_FHR4	rs10494745	chr1	196918327	A	G	0.16481	-0.9659	0.005568	1e-200	35559
Ferkingstad	6472_40_PMEL_GP100	rs997717440	chr12	55960538	TTTTTTTGTTTT	NA	0.00245	-0.0247	0.085344	0.772263	35559
Ferkingstad	6472_40_PMEL_GP100	rs1450401108	chr12	55960538	TTTT	NA	0.01098	-0.0096	0.041892	0.818743	35559
Ferkingstad	6478_2_IGLON5_IGLO5	rs148108087	chr19	51278201	A	G	0.05342	0.2048	0.018247	3.126e-29	35559
Ferkingstad	6485_59_IGLL1_IGLL1	rs9624216	chr22	23580365	A	G	0.09707	-0.6045	0.010409	1e-200	35559
Ferkingstad	6493_9_CPZ_CBPZ	rs13127468	chr4	8597931	A	C	0.42431	-0.0672	0.00802	5.353e-17	35559
Ferkingstad	6507_16_NCAM2_NCAM2	rs2826851	chr21	21463626	G	A	0.26627	0.4587	0.007223	1e-200	35559
Ferkingstad	6521_35_NPTX2_NPTX2	rs13308423	chr7	98654561	G	A	0.70339	0.1187	0.00905	2.649e-39	35559
Ferkingstad	6525_17_DUSP13_DUSP13	rs145951301	chr10	75094854	G	A	0.00496	1.2169	0.057391	8.855e-100	35559
Ferkingstad	6527_1_TRIL_TRIL	rs568200286	chr7	28963282	C	A	0.00909	0.3666	0.044233	1.152e-16	35559
Ferkingstad	6544_33_NELL1_NELL1	rs8176786	chr11	20937848	T	C	0.06299	1.0654	0.012451	1e-200	35559
Ferkingstad	6550_4_ICAM4_ICAM4	rs766820266	chr19	10287832	G	A	0.00501	-1.3069	0.057067	4.535e-116	35559
Ferkingstad	6551_94_SERPINA12_Vaspin	rs17091005	chr14	94522070	C	T	0.24239	0.5477	0.007721	1e-200	35559
Ferkingstad	6557_50_LRRC15_LRC15	rs58182031	chr3	194366591	A	G	0.11794	0.4608	0.012867	1e-200	35559
Ferkingstad	6558_5_COLEC10_COL10	rs72682447	chr8	119126314	C	NA	0.0105	-0.2749	0.039484	3.346e-12	35559
Ferkingstad	6572_10_LRRTM4_LRRT4	rs1922804	chr2	77467668	A	T	0.3135	-0.0534	0.008648	6.621e-10	35559
Ferkingstad	6574_11_FAIM3_FAIM3	rs72758947	chr1	206913708	G	A	0.16131	-0.1586	0.011544	5.966e-43	35559
Ferkingstad	6617_12_FCRL6_FCRL6	rs57198275	chr1	159815106	A	G	0.1824	-0.1518	0.01048	1.512e-47	35559
Ferkingstad	6620_82_LINGO1_LIGO1	rs140800112,rs1428671677	chr15	77520223	ATAAATAAATAAAAC	NA	0.3225	-0.0343	0.008717	8.323e-05	35559
Ferkingstad	6620_82_LINGO1_LIGO1	rs200325367,rs752623166,rs869215358	chr15	77520223	ATAAATAAATAAATAAAAC	NA	0.27455	0.0896	0.009131	9.91e-23	35559
Ferkingstad	6620_82_LINGO1_LIGO1	rs143112312,rs537792397,rs747046301	chr15	77520223	ATAAATAAATAAATAAATAAAAC	NA	0.22264	-0.0316	0.009813	0.001281	35559
Ferkingstad	6620_82_LINGO1_LIGO1	rs568556446	chr15	77520223	ATAAATAAATAAATAAATAAATAAATAAAAC	NA	0.051	-0.0368	0.018663	0.048627	35559
Ferkingstad	6626_81_CHST12_CHSTC	rs6952433	chr7	2357003	G	A	0.78617	-0.2047	0.009862	1.051e-95	35559
Ferkingstad	6627_25_PNLIPRP1_LIPR1	rs2915766	chr10	116593741	T	C	0.52608	0.1466	0.008283	4.352e-70	35559
Ferkingstad	6629_3_DEFB1_HBD_1	rs2978870	chr8	6873741	AAGATCAT	NA	0.32731	0.1253	0.008778	3.138e-46	35559
Ferkingstad	6649_51_NTN1_NET1	rs72809986	chr17	9080705	A	G	0.16179	-0.4706	0.009389	1e-200	35559
Ferkingstad	6706_18_ALPPL2_PPBN	rs12328730	chr2	232386656	T	C	0.35559	0.0522	0.008084	1.064e-10	35559
Ferkingstad	6713_4_LRP11_LRP11	rs7763718	chr6	149865398	G	T	0.38943	0.8162	0.005061	1e-200	35559
Ferkingstad	6715_63_ALPPL2_PPBN	rs12478529	chr2	232421944	T	C	0.224	0.1958	0.009598	1.676e-92	35559
Ferkingstad	6899_37_PCBD2_PHS2	rs572123056	chr5	134165299	C	T	0.00959	-0.3018	0.040929	1.66e-13	35559
Ferkingstad	6920_1_GFRAL_GFRAL	rs72988065	chr6	55619783	G	A	0.18929	0.1684	0.010249	1.158e-60	35559
Ferkingstad	6923_1_PLOD2_PLOD2	rs148118826	chr3	146106560	A	G	0.00338	-0.8011	0.069204	5.463e-31	35559
Ferkingstad	6925_26_SNX8_SNX8	rs2398666	chr7	2313965	G	A	0.81735	-0.1277	0.010616	2.517e-33	35559
Ferkingstad	6927_7_NDST1_NDST1	rs6863373	chr5	150530369	T	C	0.44916	0.1343	0.008357	4.078e-58	35559
Ferkingstad	6930_95_ST8SIA6_SIA8F	rs45462798	chr10	17453620	A	T	0.03592	-0.1285	0.02119	1.326e-09	35559
Ferkingstad	6947_4_ST3GAL6_SIA10	rs9838706	chr3	98821639	CAGAC	NA	0.057	-1.7193	0.010493	1e-200	35559
Ferkingstad	6955_68_SNX1_SNX1	rs77404765	chr15	64300071	C	T	0.01934	0.4359	0.029517	2.362e-49	35559
Ferkingstad	6965_19_CNTNAP2_CNTP2	rs111637549,rs60677365,rs765991891	chr7	145669693	TAC	NA	0.7125	-0.4549	0.007016	1e-200	35559
Ferkingstad	6969_14_WFDC5_WFDC5	rs35456522	chr20	45098802	C	G	0.27453	-0.0585	0.00894	5.99e-11	35559
Ferkingstad	6984_6_IGSF8_IGSF8	rs12408242	chr1	160092144	C	T	0.17984	0.1629	0.010345	7.195e-56	35559
Ferkingstad	6998_106_ASPH_HAAH	rs112800350	chr8	61779251	T	C	0.03568	-0.2424	0.021085	1.377e-30	35559
Ferkingstad	7003_4_GALNT10_GLT10	rs745537109	chr5	153561256	C	T	0.00036	1.709	0.195593	2.383e-18	35559
Ferkingstad	7009_8_CD72_CD72	rs34791102	chr9	35612981	A	G	0.06974	0.2264	0.015734	6.05e-47	35559
Ferkingstad	7019_13_SEMA7A_Semaphorin_7A	rs767152274	chr15	74748492	T	C	0.00061	-2.0579	0.154083	1.096e-40	35559
Ferkingstad	7049_2_ADAM23_ADAM_23	rs575681189	chr2	206443491	C	NA	0.0787	-0.8951	0.011302	1e-200	35559
Ferkingstad	7049_2_ADAM23_ADAM_23	rs1005474640	chr2	206443491	CGCGCGTCCCCGCGCCGCTCGCTCCT	NA	0.00059	-0.4665	0.158785	0.003304	35559
Ferkingstad	7059_14_LILRA6_LIRA6	rs199865602	chr19	54220507	A	G	0.08254	1.5092	0.008538	1e-200	35559
Ferkingstad	7065_1_G6B_G6B	rs1383103148	chr6	31456514	CAAGAGGGAGAGGGGAGAGGGGAGAGGGGAGAGGGGAGAGGGGAGA	NA	0.00151	-0.6678	0.090399	1.499e-13	35559
Ferkingstad	7083_74_MATN4_MATN4	rs9784191	chr20	45310450	G	A	0.2551	-0.2493	0.00923	1.143e-160	35559
Ferkingstad	7096_30_RMDN1_RMD1	rs13267858	chr8	86498640	GCATAGTGGT	NA	0.29	-0.2691	0.008736	1e-200	35559
Ferkingstad	7096_30_RMDN1_RMD1	rs373098043	chr8	86498640	GCG	NA	0.09855	-0.1749	0.013343	2.961e-39	35559
Ferkingstad	7099_33_FSTL5_FSTL5	rs745517151	chr4	162163962	A	AGTACCAGC	0.00089	1.6158	0.134548	3.184e-33	35559
Ferkingstad	7110_2_DNAJB11_DJB11	rs368623534,rs71925975	chr3	186576634	AAAAGAA	NA	0.07297	-0.2352	0.015601	2.318e-51	35559
Ferkingstad	7110_2_DNAJB11_DJB11	rs779732746	chr3	186576634	GAAAGAAGTAAGAATCACT	NA	0.00137	-0.1139	0.097334	0.241921	35559
Ferkingstad	7128_9_VWA2_VWA2	rs5788055	chr10	114145339	TATTTTTTC	NA	0.3135	-0.0057	0.009037	0.528193	35559
Ferkingstad	7139_14_SLITRK4_SLIK4	rs5907450	chrX	143634328	G	C	0.51332	-0.2197	0.007393	4.479e-194	35559
Ferkingstad	7140_1_CELA2A_ELA2A	rs78880003	chr1	15414434	T	C	0.06114	-0.2027	0.017514	5.619e-31	35559
Ferkingstad	7141_21_MGAT4B_MGT4B	rs112938505	chr5	179806172	A	G	0.01708	-1.2323	0.025838	1e-200	35559
Ferkingstad	7145_1_ITIH3_ITIH3	rs2071044	chr3	52813585	T	C	0.46731	0.4812	0.005959	1e-200	35559
Ferkingstad	7156_2_FUT10_FUT10	rs62510527	chr8	33469884	T	C	0.59812	-0.6803	0.0052	1e-200	35559
Ferkingstad	7161_25_H6PD_G6PE	rs11121349	chr1	9235735	C	G	0.4211	-0.462	0.00563	1e-200	35559
Ferkingstad	7173_141_TMEM132C_T132C	rs117965239	chr12	128616212	G	NA	0.02016	-0.8708	0.029373	3.795e-193	35559
Ferkingstad	7179_69_NFASC_NFASC	rs6667532	chr1	204979531	G	NA	0.08467	0.5321	0.014545	1e-200	35559
Ferkingstad	7185_29_GP5_GPV	rs10638925,rs3838959	chr3	194399020	CCATAAA	NA	0.22852	-0.1187	0.009635	7.054e-35	35559
Ferkingstad	7192_37_IFNLR1_CRF2_12	rs139958347	chr1	24187233	C	G	0.04778	-0.4386	0.018864	1.4e-119	35559
Ferkingstad	7198_197_FAM20B_FA20B	rs548629159	chr1	179026247	AGGCACC	NA	0.01072	0.4323	0.039922	2.519e-27	35559
Ferkingstad	7206_20_FBP1_F16P1	rs2460137	chr9	94579214	C	T	0.93039	0.1852	0.015754	6.569e-32	35559
Ferkingstad	7208_60_MGAT4C_MGT4C	rs148652337	chr12	86017128	CTTAAAAAAAACG	NA	0.00831	0.0202	0.042229	0.632405	35559
Ferkingstad	7208_60_MGAT4C_MGT4C	rs76261988	chr12	86017128	TTAAAAAAAAACG	NA	0.08148	0.0914	0.014253	1.428e-10	35559
Ferkingstad	7208_60_MGAT4C_MGT4C	rs968288784	chr12	86017128	TTTAAAAAAAAACG	NA	0.00192	0.1386	0.086953	0.110946	35559
Ferkingstad	7210_25_APLP1_Amyloid_like_protein_1	rs776145418	chr19	36075121	A	G	0.00132	-0.9789	0.108569	1.944e-19	35559
Ferkingstad	7211_2_RNASE1_RNase_1	rs12897030	chr14	20814883	T	C	0.70351	0.2193	0.009009	7.192e-131	35559
Ferkingstad	7218_87_ATP1B2_AT1B2	rs1050528	chr17	7651218	CGGGGGGT	NA	0.5401	-0.3077	0.008402	1e-200	35559
Ferkingstad	7227_75_COCH_COCH	rs28400019	chr14	30874288	A	G	0.11945	0.4379	0.012908	1e-200	35559
Ferkingstad	7228_2_ST6GALNAC6_SIA7F	rs879446196	chr9	127897512	C	G	0.02724	0.3559	0.025039	7.495e-46	35559
Ferkingstad	7244_16_IGFLR1_TM149	rs12459634	chr19	35739273	C	T	0.14147	-0.6298	0.009425	1e-200	35559
Ferkingstad	7251_64_C1QTNF3_C1QT3	rs840390	chr5	34018518	A	G	0.13114	-0.1854	0.011973	4.423e-54	35559
Ferkingstad	7266_4_SERPINA9_SPA9	rs11850199	chr14	94476326	A	C	0.2485	-0.1806	0.009518	2.731e-80	35559
Ferkingstad	7551_33_LRRC32_LRC32	rs754516349	chr11	76503537	A	G	0.00166	-0.997	0.10424	1.128e-21	35559
Ferkingstad	7628_40_CRELD1_CREL1	rs4234585	chr3	9939437	A	G	0.26656	-0.8782	0.005709	1e-200	35559
Ferkingstad	7648_9_MYBPC1_MYPC1	rs3817552	chr12	101651385	G	C	0.1536	-0.1064	0.011489	2.019e-20	35559
Ferkingstad	7761_125_CHKB_CHKB	rs138205828	chr22	50582633	C	T	0.01656	-0.8498	0.031058	7.83e-165	35559
Ferkingstad	7769_29_SH3BP2_3BP2	rs7695151	chr4	2770803	T	C	0.44185	0.2567	0.007927	1e-200	35559
Ferkingstad	7773_20_KIR2DL2_KI2L2	rs11667854	chr19	54761378	G	C	0.29451	0.0515	0.008357	7.169e-10	35559
Ferkingstad	7778_104_C9orf89_BINCA	rs188791736	chr9	93110721	T	C	0.00018	2.707	0.303602	4.822e-19	35559
Ferkingstad	7779_86_CHST11_CHSTB	rs1650132	chr12	104587879	G	A	0.48102	-0.2752	0.008126	1e-200	35559
Ferkingstad	7806_33_B4GALT7_B4GT7	rs1375412113	chr5	177683553	A	G	0.01403	-1.1274	0.03585	1e-200	35559
Ferkingstad	7808_5_GLCE_GLCE	rs28638321	chr15	69258831	C	T	0.23544	-0.6191	0.006937	1e-200	35559
Ferkingstad	7810_20_C1QTNF5_C1QTNF5	rs9640	chr11	119339269	A	T	0.13479	0.2796	0.012133	1.647e-117	35559
Ferkingstad	7822_11_HRASLS2_HRSL2	rs4963424	chr11	63559149	T	A	0.33104	-0.0522	0.008322	3.552e-10	35559
Ferkingstad	7841_84_ESAM_ESAM	rs61753651	chr11	124756673	A	G	0.00531	-1.4406	0.055201	3.905e-150	35559
Ferkingstad	7849_3_QPCT_Glutaminyl_cyclase	rs4384764	chr2	37363141	A	G	0.28728	0.2206	0.009194	3.192e-127	35559
Ferkingstad	7856_51_FAM151A_F151A	rs373739034	chr1	54610459	ACCAGC	NA	0.03025	-0.7064	0.024414	4.386e-184	35559
Ferkingstad	7857_22_NTS_NEUT	rs752750259	chr12	85387855	A	C	0.00134	-0.8559	0.118042	4.142e-13	35559
Ferkingstad	7861_9_ROR2_ROR2	rs10820918	chr9	91924171	G	A	0.31376	0.1481	0.008581	9.61e-67	35559
Ferkingstad	7863_50_PGRMC1_PGRC1	rs147630867	chrX	119243160	G	A	0.00395	0.5329	0.057994	3.971e-20	35559
Ferkingstad	7866_11_DNAJC30_DJC30	rs1031493877	chr7	73677121	GTTCCCTGCCA	NA	0.0009	-0.0895	0.131464	0.496	35559
Ferkingstad	7871_16_TMEM132A_T132A	rs555835	chr11	60921973	C	T	0.66804	0.533	0.006698	1e-200	35559
Ferkingstad	7897_75_DLG3_DLG3	rs5980943	chrX	70471885	A	G	0.19193	-0.3052	0.009288	1e-200	35559
Ferkingstad	7916_10_S100A7_S100A7	rs3014837	chr1	153458930	G	C	0.94603	-1.8252	0.012646	1e-200	35559
Ferkingstad	7921_65_FJX1_FJX1	rs10768174	chr11	36057706	A	G	0.59501	-0.1802	0.008352	3.124e-103	35559
Ferkingstad	7923_41_SEMA4C_SEM4C	rs149174129	chr2	96861401	C	G	0.00937	-1.2402	0.040539	1e-200	35559
Ferkingstad	7926_13_SPINT3_SPIT3	rs6032259	chr20	45512691	G	A	0.50487	0.3025	0.007066	1e-200	35559
Ferkingstad	7928_183_TPST1_TPST1	rs12537083	chr7	66248677	TTGTG	NA	0.27771	-0.2602	0.009263	1.331e-173	35559
Ferkingstad	7933_75_ADAM22_ADA22	rs2279542	chr7	87935182	G	C	0.48272	-0.2768	0.008086	1e-200	35559
Ferkingstad	7935_26_LARGE_LARGE	rs3210587	chr22	33920089	A	G	0.34409	0.113	0.008533	4.925e-40	35559
Ferkingstad	7945_10_SEMA6A_Semaphorin_6A	rs3733724	chr5	116444274	AAAT	NA	0.08723	0.1923	0.014897	4.032e-38	35559
Ferkingstad	7947_19_ENTHD2_AP4AT	rs61745945	chr17	81231621	A	G	0.02227	-0.2176	0.026548	2.476e-16	35559
Ferkingstad	7948_129_GLTPD2_GLTD2	rs8078118	chr17	4786743	A	C	0.35579	0.1937	0.008716	2.05e-109	35559
Ferkingstad	7950_142_BTNL9_BTNL9	rs138692142	chr5	180922778	T	C	0.00733	-0.2823	0.046812	1.635e-09	35559
Ferkingstad	7957_2_SCG3_SCG3	rs34102168,rs397762083,rs398078187	chr15	51690652	C	NA	0.80524	0.4731	0.008124	1e-200	35559
Ferkingstad	7968_15_CRTAM_CRTAM	rs2370794	chr11	122844074	G	A	0.32715	0.2309	0.008805	1.434e-151	35559
Ferkingstad	7970_315_ART3_NAR3	rs56062839,rs796735590	chr4	76109245	C	NA	0.39001	0.2586	0.008412	1e-200	35559
Ferkingstad	7980_72_B3GNT2_B3GN2	rs4073090	chr2	62336639	G	A	0.44746	0.1595	0.008093	1.848e-86	35559
Ferkingstad	7981_230_B3GALT6_B3GT6	rs60252802	chr1	1231507	C	T	0.14506	-0.0705	0.011265	3.892e-10	35559
Ferkingstad	7994_41_ERO1LB_ERO1B	rs2477599	chr1	236249930	A	T	0.57881	-0.1665	0.008117	1.627e-93	35559
Ferkingstad	7999_23_ENTPD1_CD39	rs568155412	chr10	95705491	GTTGTTG	NA	0.00116	0.3411	0.10771	0.001541	35559
Ferkingstad	7999_23_ENTPD1_CD39	rs11597849	chr10	95705491	TTTTTTG	NA	0.42277	0.1429	0.008142	5.867e-69	35559
Ferkingstad	8000_17_KIR2DL5A_KI2LA	rs144268808	chr19	54834899	A	C	0.12512	1.3877	0.008354	1e-200	35559
Ferkingstad	8004_15_GAPDHS_G3PT	rs547935835	chr19	35581466	A	NA	0.00544	-0.3549	0.05415	5.6e-11	35559
Ferkingstad	8005_1_MXRA7_MXRA7	rs7219390	chr17	76688776	C	T	0.40914	-0.2843	0.008055	1e-200	35559
Ferkingstad	8006_12_DNAJB12_DJB12	rs9416018	chr10	72340884	A	G	0.66848	-0.0833	0.008666	7.088e-22	35559
Ferkingstad	8013_9_LMAN2L_LMA2L	rs574525057	chr2	96737199	T	C	0.00572	-0.7708	0.051186	3.018e-51	35559
Ferkingstad	8024_64_TPST2_TPST2	rs2283824	chr22	26528490	A	G	0.35117	0.1493	0.008588	1.083e-67	35559
Ferkingstad	8028_22_SPINK5_SPINK5	rs150640655,rs553831150	chr5	148121657	AAAAT	NA	0.66413	0.1254	0.008653	1.375e-47	35559
Ferkingstad	8035_6_C1orf198_CA198	rs56148170	chr1	230872285	G	A	0.12962	0.1438	0.011993	3.994e-33	35559
Ferkingstad	8039_41_FAM177A1_F177A	rs4007475	chr14	35046384	GGCGCGAGGCGGGCGCTGCGGGT	NA	0.86386	-0.7457	0.008817	1e-200	35559
Ferkingstad	8042_88_SPINK9_ISK9	rs758498799	chr5	148220705	G	A	0.0016	-0.9507	0.099877	1.753e-21	35559
Ferkingstad	8043_153_COMP_COMP	rs12974746	chr19	18795739	G	A	0.03789	-0.5422	0.021966	1.606e-134	35559
Ferkingstad	8044_90_XG_XG	rs5939319	chrX	2782116	A	G	0.13979	0.1977	0.01008	1.184e-85	35559
Ferkingstad	8053_16_DNAJB14_DJB14	rs55797991	chr4	99850238	T	C	0.12331	-0.0839	0.012025	3.007e-12	35559
Ferkingstad	8059_1_THPO_Tpo	rs535950824	chr3	184184677	A	G	0.00309	-0.5169	0.070819	2.901e-13	35559
Ferkingstad	8065_245_PATE4_PATE4	rs665677	chr11	125882266	G	A	0.74794	-0.127	0.009066	1.392e-44	35559
Ferkingstad	8068_43_KIAA1161_K1161	rs4879780	chr9	34367518	G	A	0.61381	0.1202	0.008012	7.085e-51	35559
Ferkingstad	8080_24_MSMP_PSMP	rs10758322	chr9	35776193	T	C	0.41831	0.0624	0.008408	1.156e-13	35559
Ferkingstad	8097_77_LIPN_LIPN	rs10509554	chr10	88766035	T	C	0.32389	0.7772	0.005602	1e-200	35559
Ferkingstad	8099_42_SPON2_SPON2	rs112867513	chr4	1175462	CGGTGGGCCCAGGCTGGGGGCTCTCCAGCTAGGATGTAGGGCGGT	NA	0.12538	0.3609	0.012059	8.248e-197	35559
Ferkingstad	8099_42_SPON2_SPON2	rs62293577	chr4	1175462	CGGTGGGCCCAGGCTGGGGGGTCCCCAGCTAGGATGTAGGGCGGT	NA	0.12612	0.2287	0.011923	5.296e-82	35559
Ferkingstad	8100_15_ADM2_ADM2	rs753656827	chr22	50482715	CGCCAACACTTGGGCCCCCGAAG	NA	0.00029	-0.426	0.257395	0.097915	35559
Ferkingstad	8100_15_ADM2_ADM2	rs3840963,rs72438078	chr22	50482715	CGCCA	NA	0.12155	0.1944	0.012422	3.31e-55	35559
Ferkingstad	8219_14_ZG16_ZG16	rs684286	chr16	29764626	G	A	0.99989	-3.7392	0.462336	6.084e-16	35559
Ferkingstad	8225_86_EPHB2_EPHB2	rs2043970	chr1	22735452	GAAGAAGAAGAAGC	NA	0.08194	-0.4596	0.014846	1e-200	35559
Ferkingstad	8229_1_GXYLT1_GXLT1	rs560905337	chr12	42144454	GGCCCGCGACGCCGGCGCTTCTCACGGCGCCGCGTCCGCC	NA	0.00631	-0.4294	0.051511	7.684e-17	35559
Ferkingstad	8229_1_GXYLT1_GXLT1	rs1030172848	chr12	42144454	GGCTCACGGCGCCGCGTCCGCC	NA	0.00037	0.9286	0.227012	4.304e-05	35559
Ferkingstad	8229_1_GXYLT1_GXLT1	rs549907912	chr12	42144454	G	NA	0.01325	1.675	0.027224	1e-200	35559
Ferkingstad	8231_122_FLT1_VEGF_sR1	rs375425640	chr13	28468224	T	G	0.00176	0.84	0.105371	1.563e-15	35559
Ferkingstad	8233_2_ITIH5_ITIH5	rs12761343	chr10	7667407	G	C	0.65571	0.341	0.00918	1e-200	35559
Ferkingstad	8235_48_CHGB_SCG1	rs36054946	chr20	5886044	C	T	0.01431	-0.2873	0.034784	1.461e-16	35559
Ferkingstad	8243_55_SPINK1_TATI	rs7725017	chr5	147838260	A	C	0.60947	-0.1133	0.008007	1.872e-45	35559
Ferkingstad	8250_2_PTPRJ_PTPRJ	rs770948796	chr11	49718788	G	A	0.00188	2.4119	0.093774	6.903e-146	35559
Ferkingstad	8252_2_NOTUM_NOTUM	rs763497311	chr17	81954950	TCCTCTCTCTCTCTCTTTCTCTCTCTCTC	NA	0.48196	0.0127	0.008229	0.122738	35559
Ferkingstad	8252_2_NOTUM_NOTUM	rs776727369	chr17	81954950	TCCTCTCTCTCTTTCTCTCTCTCTC	NA	0.00035	-0.289	0.200491	0.149455	35559
Ferkingstad	8252_2_NOTUM_NOTUM	rs112379605,rs770870923	chr17	81954950	TCTCCTCTCTCTCTTTCTCTCTCTCTC	NA	0.08158	-0.2346	0.014772	8.491e-57	35559
Ferkingstad	8252_2_NOTUM_NOTUM	rs1368680248	chr17	81954950	TCTCTCCTCTCTCTCTTTCTCTCTCTCTC	NA	0.00097	0.2072	0.128175	0.105977	35559
Ferkingstad	8252_2_NOTUM_NOTUM	rs1206066975	chr17	81954950	TCTCTCTCTCCTCTCTCTCTCTCTCTCTC	NA	0.00149	0.0262	0.097789	0.788759	35559
Ferkingstad	8252_2_NOTUM_NOTUM	rs556604262	chr17	81954950	TCTCTCTCTCCTCTCTCTCTTTCTCTCTCTCTA	NA	0.00063	0.1773	0.156502	0.257259	35559
Ferkingstad	8255_34_MRVI1_MRVI1	rs4910165	chr11	10652497	G	C	0.65505	-0.1096	0.008313	1.072e-39	35559
Ferkingstad	8258_22_UXS1_UXS1	rs868514047	chr2	106194295	ACAATGCGCGGCGGCGGCGGCGGCAGCGACCCC	NA	0.00326	0.1847	0.071482	0.00977	35559
Ferkingstad	8258_22_UXS1_UXS1	rs769332823	chr2	106194295	ACAATGCGCGGCGGCGGCGGCGGCAGCGGCCCG	NA	0.01795	-0.0564	0.030146	0.061359	35559
Ferkingstad	8258_22_UXS1_UXS1	rs1403587919	chr2	106194295	ACAATGCGCGGCGGCGGCGGCGGCAGCGGCGGCAGCGGCCCC	NA	0.00298	0.1745	0.069189	0.011667	35559
Ferkingstad	8258_22_UXS1_UXS1	rs1477254739	chr2	106194295	ACAATGCGCGGCGGCGGCGGCGGCGGCGGCAGCGGCCCC	NA	0.00578	0.2418	0.052658	4.393e-06	35559
Ferkingstad	8258_22_UXS1_UXS1	rs78870678	chr2	106194295	ACAATGCGCGGCGGCGTCGGCGGCAGCGGCCCC	NA	0.10832	0.1674	0.013035	9.551e-38	35559
Ferkingstad	8265_225_TMPO_LAP2B	rs779002417	chr12	98531705	C	A	0.00024	-1.4893	0.247229	1.702e-09	35559
Ferkingstad	8269_327_ARSK_ARSK	rs149766065	chr5	95591539	T	C	0.00262	-0.9958	0.07891	1.651e-36	35559
Ferkingstad	8274_64_STX7_Syntaxin_7	rs3813356	chr6	132513379	T	C	0.37468	-0.1171	0.008241	7.987e-46	35559
Ferkingstad	8289_8_GPNMB_GPNMB	rs140122424	chr7	23246910	T	C	0.00342	-1.9154	0.070747	2.006e-161	35559
Ferkingstad	8296_117_KDELC2_KDEL2	rs74911261	chr11	108486410	A	G	0.02	-1.0197	0.028545	1e-200	35559
Ferkingstad	8297_8_DNAJC10_DJC10	rs559486433	chr2	182854317	C	T	0.00428	-0.8062	0.058797	8.667e-43	35559
Ferkingstad	8299_66_LILRA4_LIRA4	rs2241384,rs534566751	chr19	54338670	GGGT	NA	0.81776	0.5075	0.008494	1e-200	35559
Ferkingstad	8300_82_PEX14_PEX14	rs33999128,rs56383935	chr1	10483931	AATTC	A	0.50804	0.051	0.007993	1.768e-10	35559
Ferkingstad	8303_102_C12orf10_MYG1	rs777161707	chr12	53299904	A	G	0.0011	-0.9859	0.118431	8.458e-17	35559
Ferkingstad	8304_50_TNFRSF11B_OPG	rs11300005	chr8	119088959	C	CT	0.43707	0.1513	0.00825	3.943e-75	35559
Ferkingstad	8309_12_HYAL1_HYAL1	rs116482870	chr3	50302191	T	C	0.04773	-0.2397	0.018978	1.434e-36	35559
Ferkingstad	8310_6_ZG16B_U773	rs9925556	chr16	2830104	T	C	0.71418	0.1845	0.008531	9.963e-104	35559
Ferkingstad	8327_26_DPEP2_DPEP2	rs139093943	chr16	67332953	G	A	0.00199	-1.7351	0.093365	4.33e-77	35559
Ferkingstad	8336_267_GRAMD1C_GRM1C	rs750809685	chr3	113913126	G	A	0.00381	1.3519	0.061449	2.864e-107	35559
Ferkingstad	8337_65_PTPRU_PTPRU	rs41266213	chr1	29306974	ATGGCTCAGCCCAGCCC	NA	0.05534	0.1422	0.017984	2.633e-15	35559
Ferkingstad	8337_65_PTPRU_PTPRU	rs3835409,rs67244862	chr1	29306974	GTGGCTCAGCCCAGCCCAGCCC	NA	0.29494	-0.1393	0.009041	1.438e-53	35559
Ferkingstad	8337_65_PTPRU_PTPRU	rs1029445168	chr1	29306974	GTGGCTCAGCCCAGCCT	NA	0.00018	-0.2082	0.280233	0.45751	35559
Ferkingstad	8345_27_GPX7_GPX7	rs11205979	chr1	52610744	C	T	0.86514	-0.7111	0.009407	1e-200	35559
Ferkingstad	8346_9_DPP7_DPP2	rs10747049	chr9	137114298	C	G	0.76393	0.4769	0.007751	1e-200	35559
Ferkingstad	8351_17_PRSS57_PRS57	rs9304936	chr19	689590	G	C	0.69177	0.4903	0.006983	1e-200	35559
Ferkingstad	8356_88_OXT_NEU1	rs877172	chr20	3069244	G	T	0.33172	0.3649	0.007019	1e-200	35559
Ferkingstad	8360_169_NCR1_NKp46	rs2278428	chr19	54906696	A	C	0.89967	0.4433	0.013182	1e-200	35559
Ferkingstad	8364_74_UST_UST	rs184021971	chr6	148754255	T	C	0.00813	-0.9315	0.046589	6.194e-89	35559
Ferkingstad	8376_25_LHB_LSHB	rs79785970	chr19	49014074	G	C	0.12745	-0.4379	0.011722	1e-200	35559
Ferkingstad	8394_56_RNASE2_RNase_2	rs2233859	chr14	20891649	A	C	0.46752	0.1431	0.007837	1.736e-74	35559
Ferkingstad	8397_147_QSOX2_QSOX2	rs10858248	chr9	136216478	G	A	0.53567	-0.3346	0.005823	1e-200	35559
Ferkingstad	8398_277_RARRES1_RAR_responsive_protein_TIG1	rs73015669	chr3	158738529	A	C	0.15723	1.2992	0.00555	1e-200	35559
Ferkingstad	8402_22_CYTL1_CYTL1	rs561351605	chr4	5024914	CA	NA	0.00653	-0.0502	0.050607	0.321221	35559
Ferkingstad	8402_22_CYTL1_CYTL1	rs9998211	chr4	5024914	C	NA	0.18988	0.4522	0.008753	1e-200	35559
Ferkingstad	8403_18_FASN_Fatty_acid_synthase	rs62078747	chr17	82097330	G	C	0.60786	-0.1535	0.008382	6.448e-75	35559
Ferkingstad	8464_31_RSPO4_RSPO4	rs75904281	chr20	963194	T	C	0.01413	-0.391	0.03463	1.455e-29	35559
Ferkingstad	8468_19_KLK3_PSA	rs2659051	chr19	50842312	G	C	0.82209	0.0657	0.010296	1.758e-10	35559
Ferkingstad	8469_41_IGFBP2_IGFBP_2	rs4674100	chr2	216615701	A	G	0.2564	-0.0568	0.009402	1.53e-09	35559
Ferkingstad	8479_4_MMP10_MMP_10	rs486055	chr11	102779693	T	C	0.16549	-0.3796	0.011153	1e-200	35559
Ferkingstad	8480_29_EFEMP1_FBLN3	rs55867135	chr2	55875131	TATATATATATAAATCATAT	NA	0.05766	-0.0553	0.017632	0.001711	35559
Ferkingstad	8480_29_EFEMP1_FBLN3	rs538928162	chr2	55875131	TATATATATATAAATTATGT	NA	0.00014	0.0348	0.279829	0.901029	35559
Ferkingstad	8480_29_EFEMP1_FBLN3	rs1029222416	chr2	55875131	TATATATATATAAATTAT	NA	0.00719	-0.074	0.049292	0.133289	35559
Ferkingstad	8480_29_EFEMP1_FBLN3	rs55673402	chr2	55875131	TATATATATATATATAAATTATAT	NA	0.00202	0.0101	0.093392	0.91388	35559
Ferkingstad	8484_24_LEP_Leptin	rs774055408	chr7	128254624	A	C	0.00213	-0.6472	0.094155	6.253e-12	35559
Ferkingstad	8535_102_DMKN_Dermokine	rs773160478	chr19	35498877	G	GGAA	0.00045	1.4084	0.172581	3.328e-16	35559
Ferkingstad	8606_39_GPNMB_GPNMB	rs2268748	chr7	23273551	GC	NA	0.05456	0.745	0.01471	1e-200	35559
Ferkingstad	8660_5_OLFML3_OLFL3	rs4381184	chr1	113947147	C	A	0.70129	0.0931	0.009095	1.37e-24	35559
Ferkingstad	8664_36_PKDCC_PKDCC	rs34372645	chr2	42054172	A	G	0.02775	0.2534	0.025215	9.222e-24	35559
Ferkingstad	8687_26_TMEM106B_T106B	rs13237518	chr7	12229967	A	NA	0.40194	-0.1116	0.008033	6.972e-44	35559
Ferkingstad	8697_38_GPC1_Glypican_1	rs1126920	chr2	240466062	T	C	0.09829	0.6338	0.011144	1e-200	35559
Ferkingstad	8759_29_A4GALT_a1_4_Galactosyltransferase	rs5751348	chr22	42717787	A	NA	0.483	-0.3144	0.006497	1e-200	35559
Ferkingstad	8768_4_BCL10_Bcl_10	rs1390357590,rs397860737	chr1	85323968	CAA	NA	0.34001	0.0588	0.008626	9.341e-12	35559
Ferkingstad	8773_172_EMILIN3_EMIL3	rs61739314	chr20	41361737	C	G	0.03861	-0.6712	0.021514	1e-200	35559
Ferkingstad	8778_3_NOG_Noggin	rs76164057	chr17	56763503	G	A	0.01406	1.2598	0.03543	1e-200	35559
Ferkingstad	8786_6_FAM171B_F171B	rs1123176	chr2	186742744	C	T	0.15665	-0.1865	0.010802	8.649e-67	35559
Ferkingstad	8794_13_DPEP1_DPEP1	rs258341	chr16	89624734	C	T	0.63812	0.4832	0.006435	1e-200	35559
Ferkingstad	8795_48_TFRC_TR	rs11391478	chr3	196075884	AGGGGGGG	NA	0.0002	0.469	0.299516	0.117382	35559
Ferkingstad	8795_48_TFRC_TR	rs564629951	chr3	196075884	GCGGGGGG	NA	0.00455	0.0695	0.060809	0.253074	35559
Ferkingstad	8795_48_TFRC_TR	rs200009621	chr3	196075884	GGGCGGGG	NA	0.00045	0.2207	0.187628	0.239489	35559
Ferkingstad	8795_48_TFRC_TR	rs74199047	chr3	196075884	GGGGGGC	NA	0.08277	0.0184	0.014836	0.214895	35559
Ferkingstad	8814_33_PSAPL1_SAPL1	rs35791045	chr4	7425380	G	A	0.17813	0.4446	0.008893	1e-200	35559
Ferkingstad	8841_65_CILP2_CILP2	rs766002166	chr19	19545609	A	G	0.00128	-1.3368	0.11232	1.16e-32	35559
Ferkingstad	8842_16_GRAMD1C_GRM1C	rs199523688	chr3	113904610	GTTTTTTTTTTTC	NA	0.34514	0.3528	0.007173	1e-200	35559
Ferkingstad	8859_51_CA11_CAH11	rs2303147	chr19	48639768	C	T	0.83835	-0.1823	0.010722	7.981e-65	35559
Ferkingstad	8866_53_QPCTL_QPCTL	rs17850756	chr19	45703004	A	NA	0.27928	-0.2941	0.009215	1e-200	35559
Ferkingstad	8874_53_CLN5_CLN5	rs700363	chr13	77001261	A	G	0.08986	-0.172	0.013697	3.614e-36	35559
Ferkingstad	8877_22_EVA1C_F176C	rs34028712	chr21	32513268	C	T	0.41258	0.0694	0.008052	6.757e-18	35559
Ferkingstad	8885_6_CACNA2D3_CA2D3	rs147781318	chr3	54122380	A	NA	0.40395	0.2158	0.00863	5.458e-138	35559
Ferkingstad	8890_9_TMEM132B_T132B	rs3825381	chr12	125652317	T	C	0.25837	-0.1682	0.009447	6.446e-71	35559
Ferkingstad	8892_14_PEAR1_PEAR1	rs12566888	chr1	156899255	T	G	0.063	-0.1026	0.016492	4.933e-10	35559
Ferkingstad	8893_29_PARP1_PARP	rs1279733990,rs200131037	chr1	226349525	CGGCTAATTTTTTTTTTCT	NA	0.16535	-0.0523	0.010712	1.049e-06	35559
Ferkingstad	8894_80_HNRNPAB_hnRNP_A_B	rs148914345	chr5	178206871	T	A	0.00493	-0.5296	0.055437	1.258e-21	35559
Ferkingstad	8900_28_NEO1_NEO1	rs62016793	chr15	73051855	G	C	0.44509	-0.1712	0.008296	1.26e-94	35559
Ferkingstad	8909_77_GNPDA1_GNPI1	rs7730740	chr5	142013141	CGGAGGAGTTC	NA	0.18602	0.1777	0.010369	7.868e-66	35559
Ferkingstad	8916_32_STIM1_STIM1	rs1869085	chr11	3883134	C	A	0.32545	-0.0951	0.008509	5.351e-29	35559
Ferkingstad	8923_94_GALNT16_GLTL1	rs12100668	chr14	69326758	A	G	0.59231	0.1685	0.008336	7.319e-91	35559
Ferkingstad	8925_25_RRM2B_RIR2B	rs28999668	chr8	102238962	GGTCCGCTG	NA	0.06303	0.3087	0.016201	6.052e-81	35559
Ferkingstad	8925_25_RRM2B_RIR2B	rs72554091	chr8	102238962	T	NA	0.10158	-0.0352	0.013379	0.008514	35559
Ferkingstad	8932_1_ENTPD6_ENTP6	rs6050446	chr20	25214873	G	A	0.96837	0.3418	0.023645	2.305e-47	35559
Ferkingstad	8956_96_SCARF2_SREC_II	rs738087	chr22	20421260	G	A	0.78348	0.1556	0.009868	5.159e-56	35559
Ferkingstad	8957_72_ERLEC1_XTP3B	rs111746812,rs553563271	chr2	53736700	G	NA	0.15496	-0.1005	0.010937	3.972e-20	35559
Ferkingstad	8958_51_CHL1_CHL1	rs13077895	chr3	51395	G	A	0.35544	-0.2291	0.008612	6.138e-156	35559
Ferkingstad	8963_8_VTI1B_Vti1_rp1	rs556708606	chr14	67713582	CA	C	0.02442	-0.1617	0.026361	8.564e-10	35559
Ferkingstad	8970_9_RIPK2_RIPK2	rs160438	chr8	89643912	G	A	0.1329	0.0844	0.011811	8.951e-13	35559
Ferkingstad	8973_23_FCRL4_FCRL4	rs11582663	chr1	157589332	T	C	0.17147	-1.1318	0.006194	1e-200	35559
Ferkingstad	8974_172_COL15A1_COFA1	rs398087456,rs80063371	chr9	98880082	GCTCCTGCCCAAC	NA	0.24565	0.1766	0.009658	1.098e-74	35559
Ferkingstad	8974_172_COL15A1_COFA1	rs10988060	chr9	98880082	GGCTCCTGCCCAGC	NA	0.01141	0.0715	0.039366	0.069326	35559
Ferkingstad	8992_1_TMEM2_TMEM2	rs3043657,rs72612993	chr9	71654297	CACACACACAC	NA	0.25098	0.0693	0.009237	6.28e-14	35559
Ferkingstad	8992_1_TMEM2_TMEM2	rs67418422,rs67944154,rs763930469	chr9	71654297	CACACACAC	NA	0.44956	0.0844	0.008035	8.233e-26	35559
Ferkingstad	9002_36_SERPINA11_SPA11	rs72631635	chr14	94455724	T	G	0.16187	-0.2965	0.011076	7.358e-158	35559
Ferkingstad	9005_16_PLXNA1_PLXA1	rs4679138	chr3	126992227	A	G	0.69635	0.2543	0.008833	2.948e-182	35559
Ferkingstad	9015_1_PRG3_PRG3	rs71470267	chr11	57404193	ATCTCTATAAATAAATAAATAAATAAATAAATAAATAAATAAATAAATAAATAAAT	NA	0.13415	-0.0032	0.01204	0.79041	35559
Ferkingstad	9015_1_PRG3_PRG3	rs71061505,rs71470267	chr11	57404193	ATCTCTATAAATAAATAAATAAATAAATAAATAAATAAATAAATAAAT	NA	0.44603	-0.069	0.008211	4.326e-17	35559
Ferkingstad	9017_58_LCT_LPH	rs4988235	chr2	135851076	A	G	0.8293	1.0524	0.006999	1e-200	35559
Ferkingstad	9018_38_PCDH10_PCD10	rs397878352,rs569399463,rs5862056	chr4	133111946	CAAGATTA	NA	0.43493	-0.137	0.008097	3.225e-64	35559
Ferkingstad	9018_38_PCDH10_PCD10	rs568531604	chr4	133111946	CAAGATT	NA	0.00571	0.0719	0.054902	0.190329	35559
Ferkingstad	9021_1_HAVCR1_TIM_1	rs13173581	chr5	157042797	T	C	0.27202	-0.3722	0.007317	1e-200	35559
Ferkingstad	9026_40_BTNL8_BTNL8	rs2387717	chr5	180938097	GGAGATGAATCAGAAGA	NA	0.51589	0.1512	0.007969	2.821e-80	35559
Ferkingstad	9076_25_PENK_PENK	rs2576575	chr8	56448734	T	C	0.45413	-0.4765	0.006156	1e-200	35559
Ferkingstad	9090_9_SYTL4_SYTL4	rs8780	chrX	100674535	C	G	0.34437	-0.1103	0.007488	4.097e-49	35559
Ferkingstad	9092_33_ANGPTL1_ANGL1	rs10718126	chr1	178929896	C	CA	0.37882	0.0747	0.008235	1.179e-19	35559
Ferkingstad	9094_5_CLEC4C_CLC4C	rs11055602	chr12	7751515	G	T	0.42611	0.8292	0.005214	1e-200	35559
Ferkingstad	9126_171_NT5DC3_NT5D3	rs954921	chr12	103779852	C	T	0.378	0.1674	0.00795	2.002e-98	35559
Ferkingstad	9172_69_MMP8_MMP_8	rs35231465	chr11	102713404	A	G	0.02267	-0.6843	0.027199	1.127e-139	35559
Ferkingstad	9173_21_PGM1_PGM1	rs61765292	chr1	63647788	G	A	0.17958	0.1158	0.010345	4.38e-29	35559
Ferkingstad	9175_48_DSCAM_DSCAM	rs78111814	chr21	40688572	C	T	0.05813	0.3257	0.017102	7.311e-81	35559
Ferkingstad	9183_7_IFNAR1_IFN_a_b_R1	rs142890975	chr21	33341168	T	C	0.01951	-1.6968	0.023469	1e-200	35559
Ferkingstad	9185_15_TFF1_TFF1	rs3761376	chr21	42366929	A	G	0.24806	-0.3748	0.007805	1e-200	35559
Ferkingstad	9191_8_TFF2_Trefoil_factor_2	rs77505241	chr21	42349233	C	T	0.18653	-0.1112	0.010475	2.507e-26	35559
Ferkingstad	9197_4_LGALS9_LEG9	rs9896600	chr17	27655521	G	A	0.23504	-0.1368	0.009533	1.066e-46	35559
Ferkingstad	9204_33_POMC_Corticotropin_lipotropin	rs201519174	chr2	25161456	C	G	0.00459	0.9348	0.058528	2.009e-57	35559
Ferkingstad	9211_19_SERPINF1_PEDF	rs62088172	chr17	1762959	T	C	0.33841	-0.2851	0.008725	1e-200	35559
Ferkingstad	9212_22_CTSF_CATF	rs1791679	chr11	66570403	A	NA	0.30466	0.1843	0.008743	1.207e-98	35559
Ferkingstad	9213_24_FTCD_FTCD	rs61735836	chr21	46152973	T	C	0.04398	0.8885	0.016562	1e-200	35559
Ferkingstad	9216_100_PLXNB2_PLXB2	rs28379706	chr22	50289633	C	T	0.38482	0.4535	0.006527	1e-200	35559
Ferkingstad	9223_11_MANF_ARMET	rs1383251	chr3	51329409	A	G	0.86721	0.0864	0.01185	3.072e-13	35559
Ferkingstad	9231_23_IMPAD1_IMPA3	rs112433249	chr8	56964017	C	T	0.01441	-1.7507	0.027106	1e-200	35559
Ferkingstad	9233_71_TFPI2_TFPI__2	rs62466701	chr7	93956351	C	T	0.06581	0.1089	0.016163	1.612e-11	35559
Ferkingstad	9234_8_TWSG1_TWSG1	rs150364938	chr18	9177316	T	C	0.00305	-1.2965	0.073139	2.62e-70	35559
Ferkingstad	9241_40_SIRPG_SIRPG	rs6043409	chr20	1635560	G	A	0.68223	0.1514	0.008573	8.456e-70	35559
Ferkingstad	9244_27_PPT1_PPT1	rs4660386	chr1	40094562	C	T	0.70054	-0.1574	0.00879	1.052e-71	35559
Ferkingstad	9248_36_MYDGF_CS010	rs368362738	chr19	4658019	A	G	0.00042	1.689	0.18474	6.099e-20	35559
Ferkingstad	9249_17_TMEM9_TMEM9	rs4915486	chr1	201141835	T	C	0.33706	0.0656	0.008296	2.62e-15	35559
Ferkingstad	9251_28_MAN2B2_MA2B2	rs11943337	chr4	6600251	G	C	0.42172	0.7687	0.006261	1e-200	35559
Ferkingstad	9256_78_NPTX1_NPTX1	rs62069681	chr17	80650902	C	T	0.12752	0.5015	0.009703	1e-200	35559
Ferkingstad	9257_14_TACO1_TACO1	rs138066238	chr17	63607269	A	T	0.0061	-0.5889	0.052709	5.545e-29	35559
Ferkingstad	9263_57_SIAE_SIAE	rs78778622	chr11	124660768	C	T	0.08792	-0.2011	0.014347	1.23e-44	35559
Ferkingstad	9264_11_CTSO_CATO	rs2334114	chr4	155935041	A	C	0.22887	-0.1756	0.009569	3.196e-75	35559
Ferkingstad	9265_10_GLIPR1_GLIP1	rs36098052,rs397705215	chr12	75486801	GGGGTCTGGGGGTG	NA	0.39894	-0.086	0.008091	2.168e-26	35559
Ferkingstad	9266_1_TREM1_sTREM_1	rs4424081	chr6	41308053	G	A	0.70039	-0.3225	0.008907	1e-200	35559
Ferkingstad	9267_2_CPA4_CBPA4	rs34587586	chr7	130298758	T	G	0.34534	-1.197	0.003839	1e-200	35559
Ferkingstad	9278_9_EPYC_Epiphycan	rs138862128	chr10	44380811	G	A	0.00035	-2.2122	0.264378	5.882e-17	35559
Ferkingstad	9282_12_CRISP2_CRIS2	rs555247	chr6	49742392	A	G	0.49407	0.5647	0.005119	1e-200	35559
Ferkingstad	9288_7_FKBP7_FKBP7	rs3214535,rs397839972	chr2	178479275	CA	C	0.22795	0.3023	0.009385	1e-200	35559
Ferkingstad	9312_8_AZGP1_AZGP1	rs2525546	chr7	99954321	T	C	0.31224	-0.2378	0.008863	1.394e-158	35559
Ferkingstad	9313_27_CBLN1_CBLN1	rs117724608	chr16	49475047	A	G	0.01239	-0.6972	0.038183	1.748e-74	35559
Ferkingstad	9314_9_PSG5_PSG5	rs10403905	chr19	43133313	C	T	0.29964	0.4264	0.006847	1e-200	35559
Ferkingstad	9316_67_WFDC1_WFDC1	rs400345	chr16	84294888	T	C	0.21005	-0.44	0.008297	1e-200	35559
Ferkingstad	9321_400_NMB_NMB	rs11633788	chr15	84761911	A	T	0.3321	-0.1402	0.008501	4.117e-61	35559
Ferkingstad	9322_15_RCN1_RCN1	rs79314307	chr11	32089698	CTT	C	0.13233	-0.1728	0.011479	3.3e-51	35559
Ferkingstad	9329_28_TREML1_TRML1	rs148032261	chr6	41048698	A	G	0.00853	0.7229	0.044355	1.018e-59	35559
Ferkingstad	9335_28_PSG9_PSG9	rs8103567	chr19	43206311	A	NA	0.0469	0.1458	0.018815	9.251e-15	35559
Ferkingstad	9337_43_TAC1_TKN1	rs146825722,rs57579252	chr7	97748836	CAA	NA	0.18662	-0.1981	0.010435	2.331e-80	35559
Ferkingstad	9339_204_FKBP2_FKBP2	rs4672	chr11	64242407	A	G	0.0878	-0.0854	0.014087	1.342e-09	35559
Ferkingstad	9340_17_FKBP14_FKB14	rs746450465	chr7	30635781	G	A	0.00123	-0.7929	0.110597	7.541e-13	35559
Ferkingstad	9343_16_IL2RB_IL_2_sRb	rs228953	chr22	37135396	A	G	0.47515	0.0968	0.008213	4.594e-32	35559
Ferkingstad	9348_1_C1RL_C1RL1	rs191448232	chr12	7102090	C	G	0.00535	-1.9903	0.055489	1e-200	35559
Ferkingstad	9350_3_FSTL4_FSTL4	rs17683306	chr5	133316589	T	C	0.08905	-0.0945	0.01403	1.634e-11	35559
Ferkingstad	9357_4_CREG1_CREG1	rs7513428	chr1	167546035	C	T	0.84647	-0.2171	0.011292	2.247e-82	35559
Ferkingstad	9359_9_DLK2_EGFL9	rs2125739	chr6	43445127	C	T	0.24693	-0.1848	0.009445	3.076e-85	35559
Ferkingstad	9360_33_EDIL3_EDIL3	rs10434639	chr5	83914528	G	A	0.35296	-0.0639	0.008561	8.405e-14	35559
Ferkingstad	9370_69_GGH_GGH	rs74329104	chr8	63018637	A	G	0.07475	0.6264	0.011677	1e-200	35559
Ferkingstad	9380_2_PLA2G12B_sPLA_2__XIII	rs3829126	chr10	72954419	T	G	0.09779	-0.1494	0.013719	1.282e-27	35559
Ferkingstad	9383_24_CHI3L2_CH3L2	rs11556868	chr1	111235703	T	C	0.1316	0.0853	0.011852	6.139e-13	35559
Ferkingstad	9384_17_CAMP_Cathelicidin_peptide	rs1295739027	chr3	48057614	TAAATAAATAAATAAATAAAAAGAAAAAAAAGAAAAAAAAAAAA	NA	0.0044	-1.0916	0.062507	2.711e-68	35559
Ferkingstad	9388_18_MCEE_MCEE	rs6740268	chr2	71118834	G	T	0.17505	-0.0824	0.010198	6.472e-16	35559
Ferkingstad	9391_60_PCSK1N_PCSK1	rs1195849058	chrX	48862397	CAAA	NA	0.44306	-0.1333	0.007207	2.269e-76	35559
Ferkingstad	9391_60_PCSK1N_PCSK1	rs368016768	chrX	48862397	CA	NA	0.07877	0.0359	0.013257	0.006771	35559
Ferkingstad	9391_60_PCSK1N_PCSK1	rs782596415	chrX	48862397	C	NA	0.00081	0.1686	0.099704	0.090836	35559
Ferkingstad	9394_19_CPQ_Aminopeptidase	rs148684432	chr8	97029409	A	G	0.02033	-1.5688	0.021268	1e-200	35559
Ferkingstad	9398_30_GALP_GALP	rs139011716	chr19	56178262	A	G	0.01914	0.2271	0.028703	2.529e-15	35559
Ferkingstad	9409_11_TPSAB1_TRYB1	rs113690116	chr16	1322068	CCA	NA	0.0208	1.9383	0.019509	1e-200	35559
Ferkingstad	9416_77_CPM_CBPM	rs1908671	chr12	69039624	C	G	0.29306	-0.1013	0.009055	4.74e-29	35559
Ferkingstad	9468_8_LMAN2_Lectin__mannose_binding_2	rs12657206	chr5	177330947	ACAAGGAAGACAAGATCA	NA	0.10432	0.0211	0.013554	0.119546	35559
Ferkingstad	9468_8_LMAN2_Lectin__mannose_binding_2	rs71588653	chr5	177330947	ACGAGGAAGTGGGAAGGACACC	NA	0.38077	0.0948	0.008521	9.437e-29	35559
Ferkingstad	9470_15_METTL24_MET24	rs142431542	chr6	110351295	A	G	0.01147	-0.7451	0.036168	2.689e-94	35559
Ferkingstad	9478_69_PRPSAP1_KPRA	rs588360	chr17	76333872	ATTCA	NA	0.17019	-0.0286	0.010774	0.00794	35559
Ferkingstad	9478_69_PRPSAP1_KPRA	rs141801364	chr17	76333872	ATTCATTCATTCT	NA	0.00342	-0.0075	0.075011	0.920356	35559
Ferkingstad	9478_69_PRPSAP1_KPRA	rs141801364,rs58262193	chr17	76333872	ATTCATTCT	NA	0.58217	-0.0537	0.008213	6.209e-11	35559
Ferkingstad	9478_69_PRPSAP1_KPRA	rs1186054643	chr17	76333872	ATTCTTTCT	NA	0.00057	-0.0771	0.171421	0.652877	35559
Ferkingstad	9482_110_NUDT9_NUDT9	rs35766329	chr4	87437284	TAATTTT	NA	0.37796	0.0701	0.008366	5.349e-17	35559
Ferkingstad	9482_110_NUDT9_NUDT9	rs1491272140,rs398083275,rs70957246	chr4	87437284	TAATTTTTT	NA	0.07837	0.1281	0.015164	2.972e-17	35559
Ferkingstad	9484_75_DSG2_Desmoglein_2	rs9304098	chr18	31503667	T	G	0.45421	-0.1905	0.008195	1.584e-119	35559
Ferkingstad	9525_1_PTK7_PTK7	rs3828755	chr6	43147482	G	A	0.4627	0.0837	0.008156	1.043e-24	35559
Ferkingstad	9545_156_GZMK_Granzyme_K	rs10471928	chr5	55002903	C	T	0.56333	0.1435	0.008142	1.598e-69	35559
Ferkingstad	9557_5_MANSC1_MANS1	rs3825259	chr12	12343701	G	A	0.09551	0.3843	0.013982	2.695e-166	35559
Ferkingstad	9574_11_BIN1_BIN1	rs35103166	chr2	127124606	C	T	0.34953	0.1306	0.008389	1.197e-54	35559
Ferkingstad	9578_263_MANSC4_MANS4	rs12370269	chr12	27771725	G	A	0.21699	0.5717	0.007996	1e-200	35559
Ferkingstad	9580_5_LAMC2_Laminin_gamma_2	rs2276543	chr1	183186170	A	G	0.23971	0.6188	0.007143	1e-200	35559
Ferkingstad	9595_11_B4GALT2_B4GT2	rs3762423	chr1	43979995	C	T	0.03043	-0.5491	0.022861	1.737e-127	35559
Ferkingstad	9638_2_TIGIT_TIGIT	rs73238029	chr3	114295233	C	A	0.24423	0.0828	0.009066	6.686e-20	35559
Ferkingstad	9713_67_PDGFRL_PGFRL	rs2427709	chr8	17595419	T	C	0.93581	0.6285	0.013631	1e-200	35559
Ferkingstad	9715_15_IGSF3_IGSF3	rs113856068	chr1	116602362	TAA	NA	0.40687	-0.11	0.008452	1.005e-38	35559
Ferkingstad	9744_139_DNAJA4_DNJA4	rs113578462	chr15	78245513	CTCCCCCC	NA	0.00084	-0.2287	0.120667	0.058052	35559
Ferkingstad	9744_139_DNAJA4_DNJA4	rs34689922	chr15	78245513	CTCCCCC	NA	0.30491	-0.0691	0.008639	1.254e-15	35559
Ferkingstad	9744_139_DNAJA4_DNJA4	rs113297481,rs1491272119,rs1491463198,rs542501676	chr15	78245513	CTCCCCCGG	NA	0.05557	-0.0226	0.01742	0.194514	35559
Ferkingstad	9747_48_MARK3_MARK3	rs11160753	chr14	103541163	T	C	0.71935	0.056	0.00878	1.794e-10	35559
Ferkingstad	9754_33_NQO2_Quinone_reductase_2	rs4149358	chr6	3003736	G	A	0.37754	-0.9278	0.005638	1e-200	35559
Ferkingstad	9759_13_IDO1_INDO	rs201285786	chr8	39923390	CGAGACTCCGTCTCAA	NA	0.31018	0.0595	0.008557	3.559e-12	35559
Ferkingstad	9765_4_NDE1_NDE1	rs7206272	chr16	15632436	C	A	0.22061	0.0787	0.009553	1.742e-16	35559
Ferkingstad	9769_48_DNER_DNER	rs62193248	chr2	229732201	T	A	0.34052	-0.1848	0.008665	6.325e-101	35559
Ferkingstad	9772_153_NLGN2_NLGN2	rs1027461663	chr17	7404795	AGGCGGGTGCGAGCGGGGGGTGCGAGCGGGGGGTGTC	NA	0.00312	-0.0128	0.076333	0.86683	35559
Ferkingstad	9772_153_NLGN2_NLGN2	rs571021513	chr17	7404795	AGGCGGGTGCGAGCGGGGGGTGTG	NA	0.10092	-0.2053	0.013487	2.511e-52	35559
Ferkingstad	9790_28_BRSK2_BR_serine_threonine_kinase_2	rs4255564	chr11	1384495	T	C	0.78542	-0.1739	0.009808	2.476e-70	35559
Ferkingstad	9793_145_IGDCC4_IGDC4	rs35223184	chr15	65400920	T	C	0.01511	1.3417	0.02585	1e-200	35559
Ferkingstad	9796_4_CEL_CEL	rs592267	chr9	133065586	T	C	0.02368	0.9701	0.027683	1e-200	35559
Ferkingstad	9816_37_ISOC1_ISOC1	rs2526256	chr5	128919363	C	T	0.39026	0.1614	0.008212	5.413e-86	35559
Ferkingstad	9826_135_FHIT_Fragile_histidine_triad_protein	rs138373635	chr3	59984396	CGGGGGGGCTCTGG	NA	0.15291	-0.0285	0.01119	0.010867	35559
Ferkingstad	9826_135_FHIT_Fragile_histidine_triad_protein	rs11411678	chr3	59984396	GGGGGGCGCTCTGG	NA	0.14635	-0.0743	0.011426	7.883e-11	35559
Ferkingstad	9826_135_FHIT_Fragile_histidine_triad_protein	rs202099394	chr3	59984396	GGGGGGGGCTCTGG	NA	0.03993	-0.1158	0.020834	2.725e-08	35559
Ferkingstad	9832_33_HGD_HGD	rs2042482	chr3	120675205	T	A	0.73967	0.1233	0.009284	2.975e-40	35559
Ferkingstad	9834_62_ADH1B_ADH1B	rs1229984	chr4	99318162	C	T	0.99586	0.4338	0.062374	3.531e-12	35559
Ferkingstad	9837_60_NQO1_NAD_P_H_dehydrogenase	rs2161631	chr16	69523045	A	C	0.17038	-0.8614	0.007564	1e-200	35559
Ferkingstad	9838_4_SMAD1_SMAD1	rs34180190	chr4	145455828	A	G	0.59272	-0.05	0.008308	1.761e-09	35559
Ferkingstad	9839_148_TIRAP_Tirap	rs8177399	chr11	126290931	T	C	0.01581	-0.5654	0.031509	5.322e-72	35559
Ferkingstad	9841_197_PAICS_Multifunctional_protein_ADE2	rs138933625	chr4	56448446	G	C	0.03342	-0.1926	0.021659	5.974e-19	35559
Ferkingstad	9843_5_ACTN1_ACTN1	rs147824601	chr14	68883007	T	C	0.00108	0.8448	0.123516	7.943e-12	35559
Ferkingstad	9848_22_CCNH_Cyclin_H	rs2230641	chr5	87399457	G	A	0.20218	-0.0963	0.009848	1.387e-22	35559
Ferkingstad	9863_1_TPM4_Tropomyosin_4	rs8104011	chr19	16085954	A	G	0.01898	-0.244	0.029091	4.965e-17	35559
Ferkingstad	9867_23_FBP2_F16P2	rs573212	chr9	94587384	G	C	0.88771	0.1999	0.012662	3.837e-56	35559
Ferkingstad	9876_20_ALDOC_aldolase_C	rs141921160	chr17	28576910	T	C	0.01035	-0.6133	0.038951	7.372e-56	35559
Ferkingstad	9877_28_CRKL_CRKL	rs117003805	chr22	20951558	G	A	0.00896	-0.3129	0.042866	2.89e-13	35559
Ferkingstad	9883_29_GLO1_Glyoxalase_I	rs777974212	chr6	38682871	G	A	0.00066	-1.9272	0.154272	8.232e-36	35559
Ferkingstad	9884_8_PPIL1_PPIL1	rs12194408	chr6	36871822	G	C	0.04139	-1.3205	0.016071	1e-200	35559
Ferkingstad	9886_28_XRCC4_XRCC4	rs7736592	chr5	83348245	A	G	0.11983	0.1538	0.012232	2.933e-36	35559
Ferkingstad	9901_28_EGLN1_EGLN1	rs187721652	chr1	231605333	C	T	0.02815	0.5548	0.023687	2.533e-121	35559
Ferkingstad	9906_21_SPOCK3_TICN3	rs71620429	chr4	167218704	CACAG	NA	0.0347	-0.3273	0.022024	5.885e-50	35559
Ferkingstad	9906_21_SPOCK3_TICN3	rs62353586	chr4	167218704	CATAA	NA	0.03191	0.949	0.01752	1e-200	35559
Ferkingstad	9906_21_SPOCK3_TICN3	rs7692597	chr4	167218704	TATAG	NA	0.00884	0.012	0.044575	0.787768	35559
Ferkingstad	9916_146_LRRC4B_LRC4B	rs1372445762,rs765034662	chr19	50545739	TTA	NA	0.13106	-0.0341	0.011702	0.003567	35559
Ferkingstad	9940_35_DUSP28_DUS28	rs532600172	chr2	240560857	C	NA	0.02027	-0.9721	0.028899	1e-200	35559
Ferkingstad	9940_35_DUSP28_DUS28	rs774507085	chr2	240560857	CGCGCGCGCCCGGCGTGTCAGAGCT	NA	0.00272	-0.0996	0.080248	0.21455	35559
Ferkingstad	9950_229_LAG3_LAG_3	rs3782735	chr12	6775910	A	G	0.61726	0.1291	0.008523	7.85e-52	35559
Ferkingstad	9960_2_TBC1D5_TBCD5	rs749857979	chr3	17199441	C	T	0.00139	-0.9428	0.126995	1.137e-13	35559
Ferkingstad	9962_1_CDHR5_MUCDL	rs12360820	chr11	620927	C	A	0.82225	0.0702	0.010525	2.566e-11	35559
Ferkingstad	9964_10_MYZAP_MYZAP	rs4774967	chr15	57563562	T	G	0.34582	0.0716	0.00817	1.889e-18	35559
Ferkingstad	9981_18_KIAA1467_K1467	rs117172138	chr12	13040880	T	C	0.02006	0.5231	0.027856	1.123e-78	35559
Ferkingstad	9986_14_NPW_Neuropeptide_W	rs12921264	chr16	2020432	A	G	0.1837	-0.5382	0.008206	1e-200	35559
Ferkingstad	9995_6_DUT_DUT	rs919129	chr15	48383030	A	G	0.86197	0.0811	0.011398	1.115e-12	35559

## Sheet: ST4
GWAS	Trait	SNP	Chromosome	Position (build 37)	Effect Allele	Non-Effect Allele	Effect Allele Frequency	Effect	Standard Error	P-value	Cases	Controls
OMara	endometrioid-cancer	rs3184504	12	111884608	C	T	0.519822	0.104512	0.017948	5.77932e-09	8758	46126
OMara	endometrioid-cancer	rs7981863	13	73812141	T	C	0.265982	-0.160546	0.0205021	4.85099e-15	8758	46126
OMara	endometrioid-cancer	rs113998067	1	38073356	C	T	0.0481754	0.240746	0.0432382	2.57829e-08	8758	46126
OMara	endometrioid-cancer	rs937213	15	40322124	C	T	0.426577	0.110421	0.0179027	6.92432e-10	8758	46126
OMara	endometrioid-cancer	rs2414098	15	51537806	C	T	0.639894	0.126906	0.018744	1.28355e-11	8758	46126
OMara	endometrioid-cancer	rs11263763	17	36103565	A	G	0.547543	0.140509	0.0182168	1.22768e-14	8758	46126
OMara	endometrioid-cancer	rs882380	17	46294236	A	C	0.608645	0.105061	0.0184545	1.24873e-08	8758	46126
OMara	endometrioid-cancer	rs28628347	6	126004194	G	A	0.584084	0.114028	0.0182141	3.83888e-10	8758	46126
OMara	endometrioid-cancer	rs1740828	6	21649085	A	G	0.485476	-0.145057	0.0201445	5.98581e-13	8758	46126
OMara	endometrioid-cancer	rs9639594	7	29179186	A	G	0.222122	0.129583	0.023151	2.17721e-08	8758	46126
OMara	endometrioid-cancer	rs4733613	8	129599278	G	C	0.862502	-0.180363	0.0257659	2.55859e-12	8758	46126
OMara	nonendometrioid-cancer	rs150248856	1	189801742	C	T	0.0127054	0.984494	0.188883	1.86639e-07	1230	35447
[truncated: 22 more rows]

## Sheet: ST5
ST5	Association between plasma proteins and endometrial cancer risk - Univariable MR and colocalization
[truncated: 7,372 more rows]

[truncated: 9 more sheets: ST6, ST7, ST8, ST9, ST10, ST11, ST12, ST13, ST14]
